# Supplementary material for: The Dutch Microbiome Project defines factors that shape the healthy gut microbiome
Source: bioRxiv or medRxiv preprint supplement (doi:10.1101/2020.11.27.401125), 2020-11-27
Supplement: Supplementary file [file media-2.pdf]

## Supplementary Figures

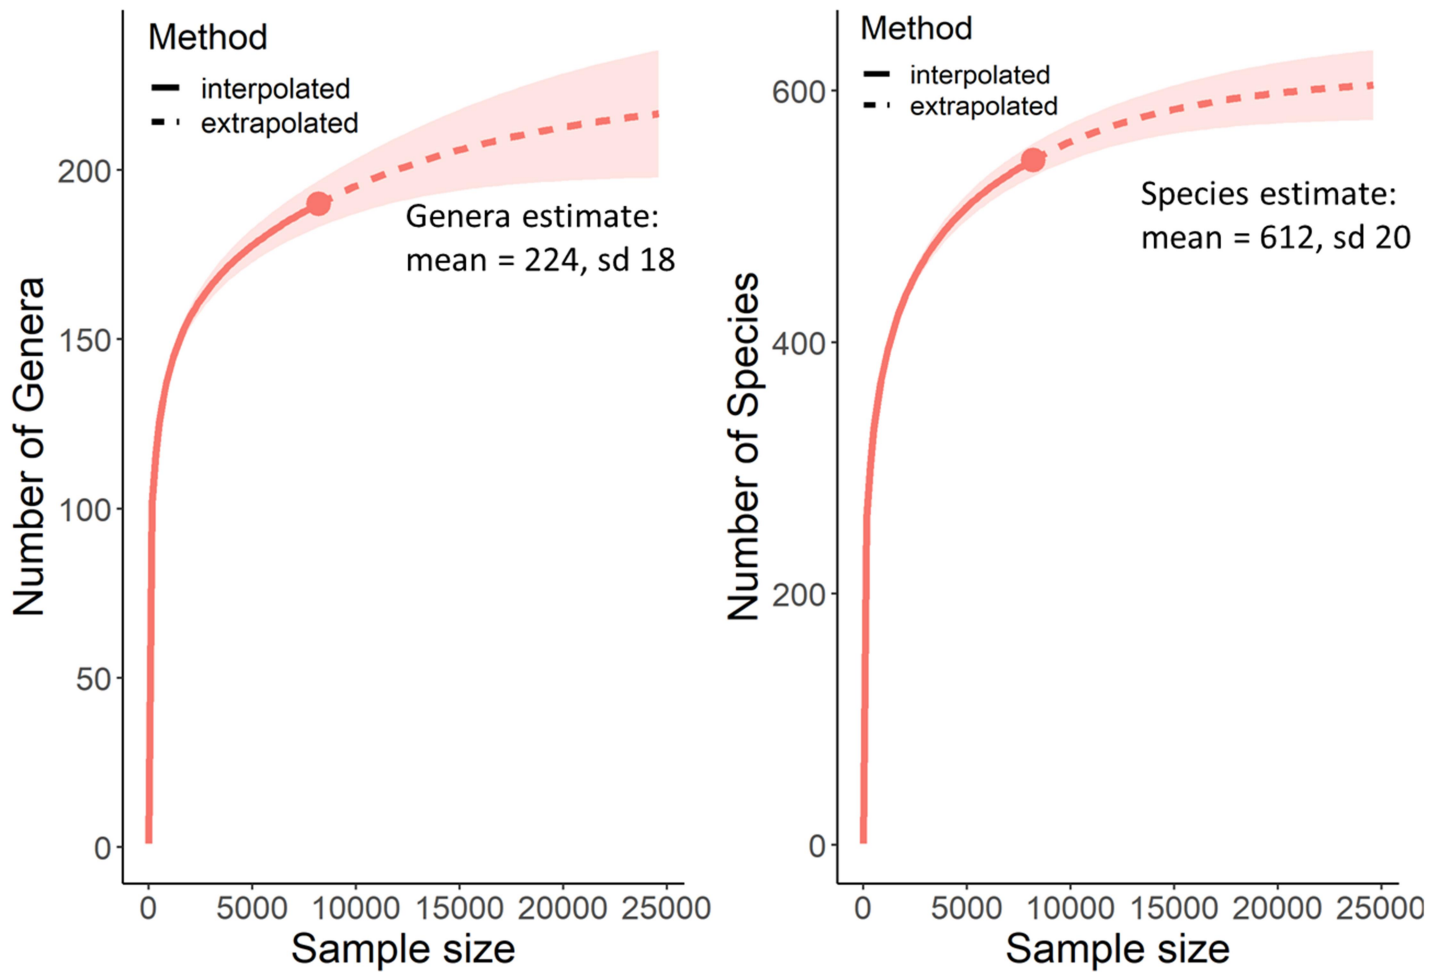

**Supplementary figure 1: Estimation of total number of species and genera in the DMP population**

Figure shows rarefaction and extrapolation sampling curve for species and genera richness calculated using Hill numbers implemented in *iNEXT* package for R. Extrapolated part of rarefaction curve is shown dotted. Standard deviation of the estimate is shaded, and asymptotic richness estimate is shown on the plots.

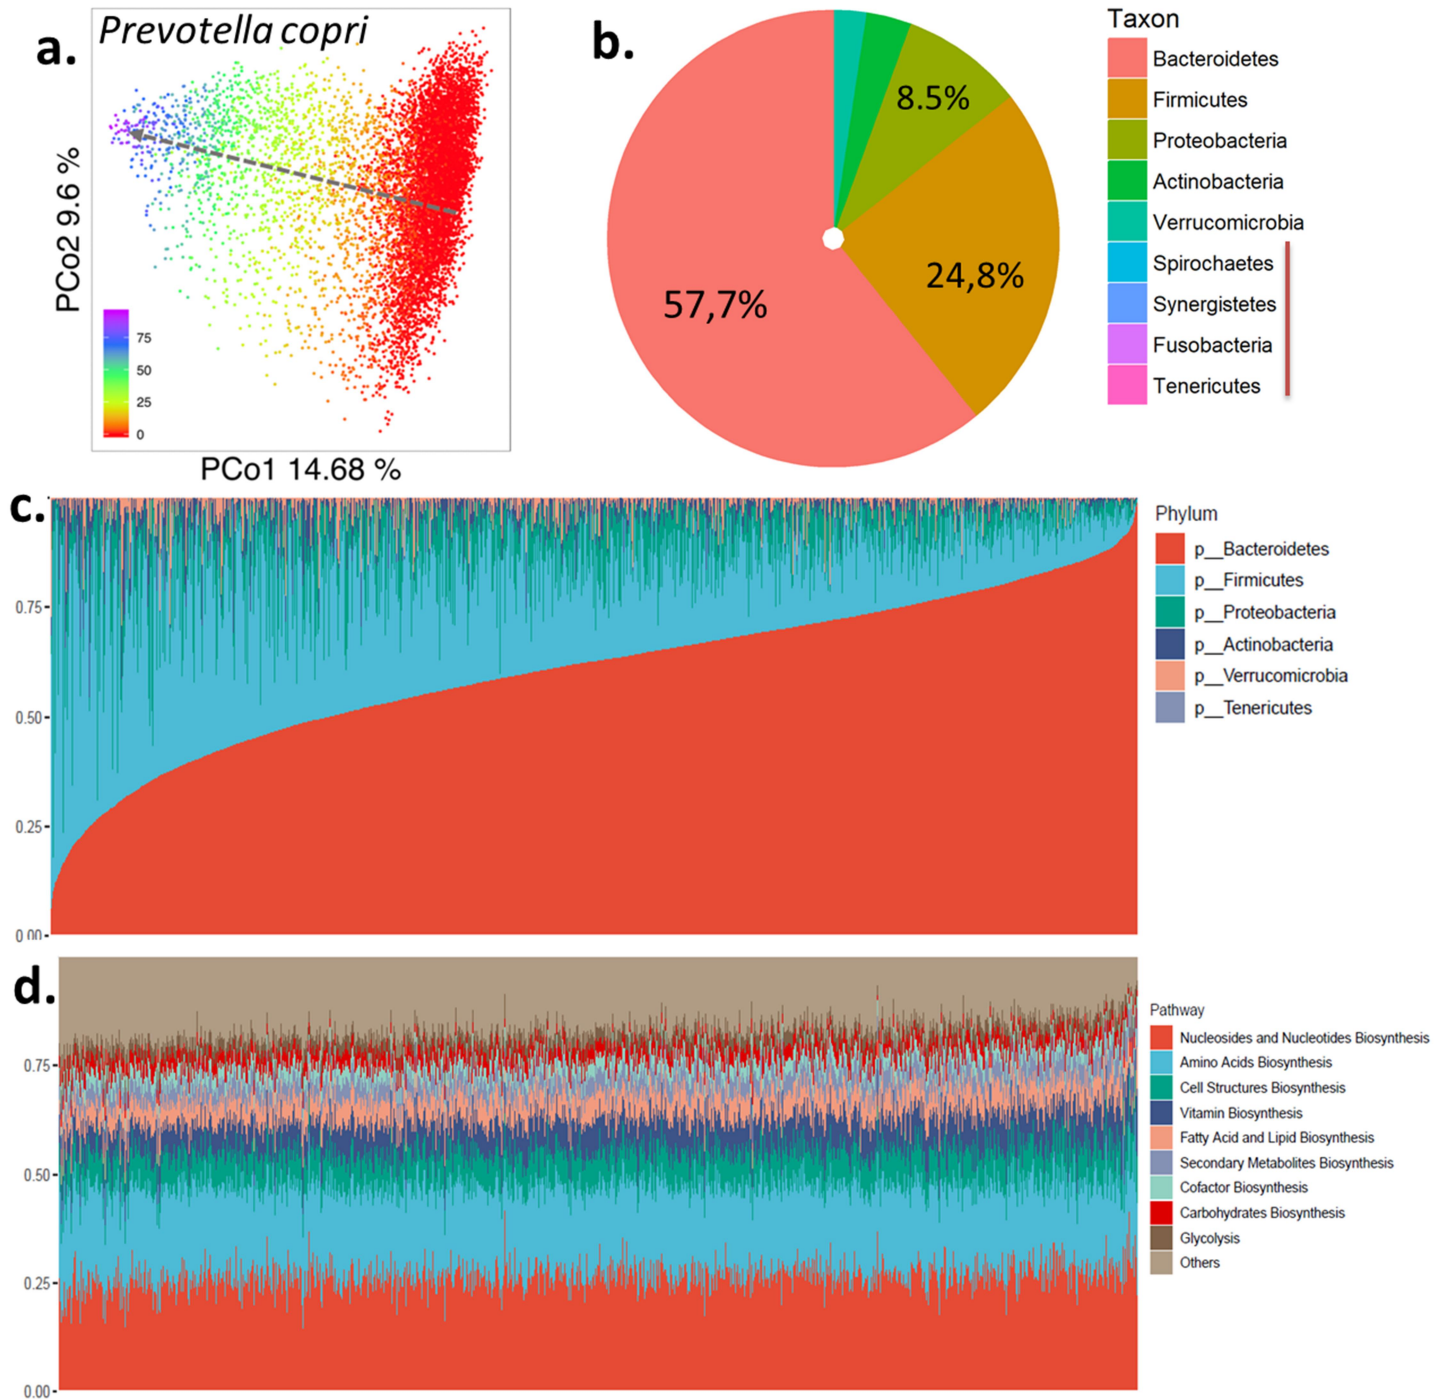

**Supplementary figure 2: Overview of DMP microbiome composition and function**

**a**, First two principal coordinates of the Bray-Curtis distance matrix calculated on microbial species of DMP cohort, colored by the relative abundance of *Prevotella copri* bacterium. **b**, Average relative abundances of bacterial phyla in the DMP cohort. **c**, Phylum-level composition of all samples in the cohort, sorted by abundance of phylum Bacteroidetes, with samples displayed as vertical lines. **d**, Relative abundances of top ten MetaCyc pathways of all samples, with samples displayed as vertical lines.

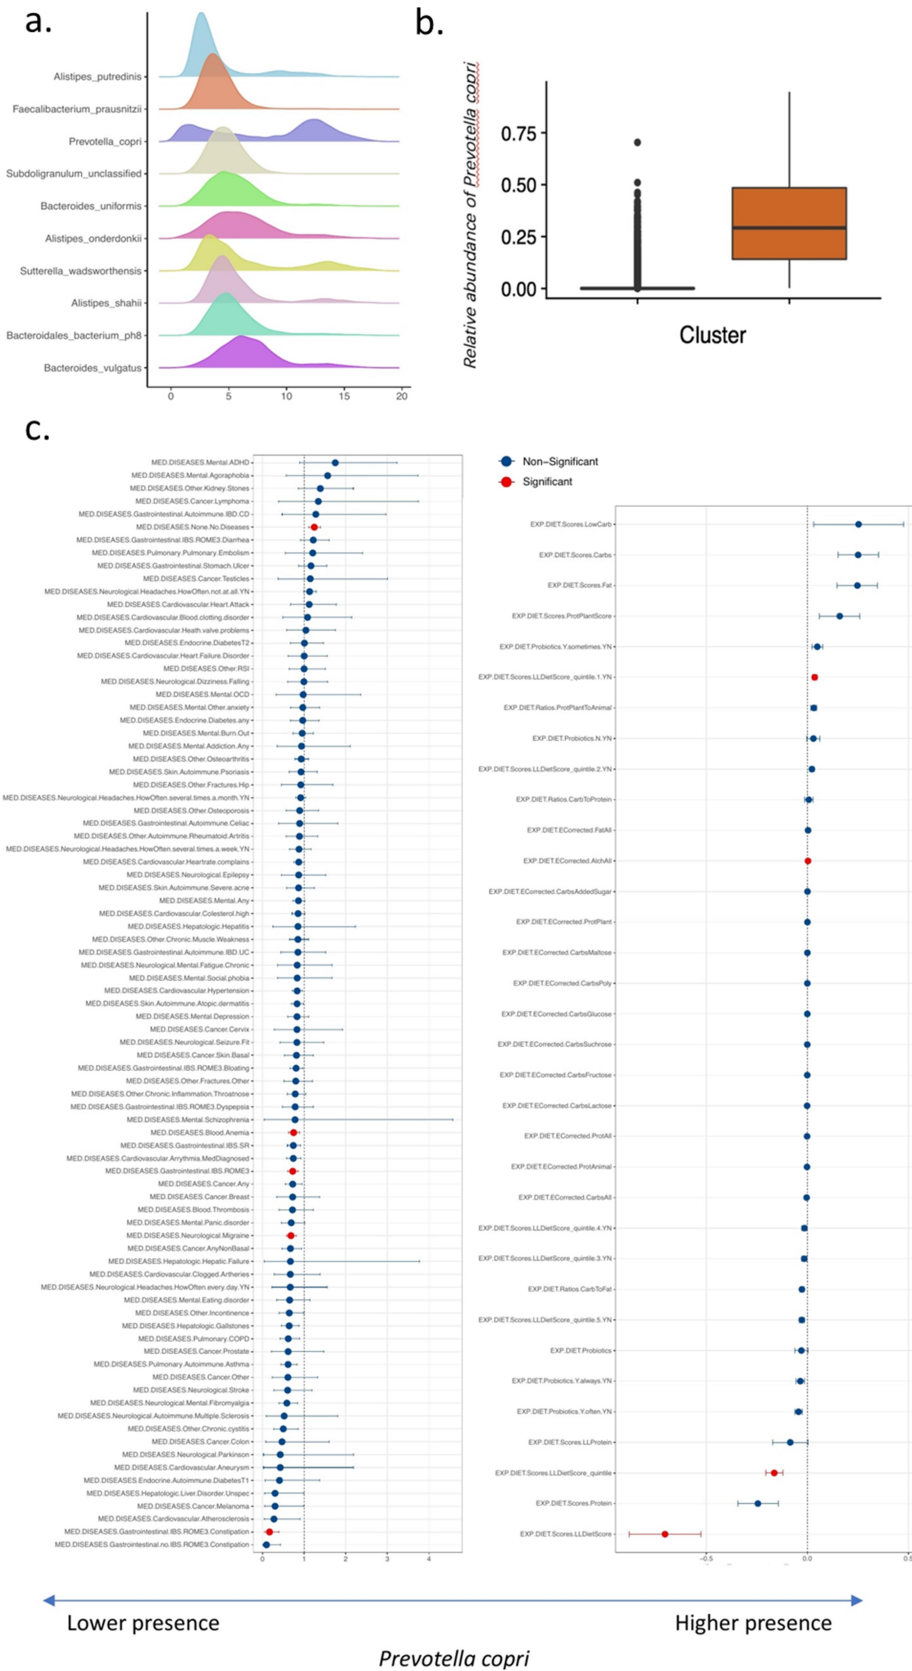

**Supplementary figure 3: Clusters determined by bi-modally distributed *Prevotella copri***

**a**, Density plots of top ten bacterial species by relative abundance. **b**, First two principal coordinates of the Bray-Curtis distance matrix calculated on microbial species of DMP cohort, colored clusters assigned based on relative abundance of *P. copri*. **c**. Association of *P. copri* with metadata.

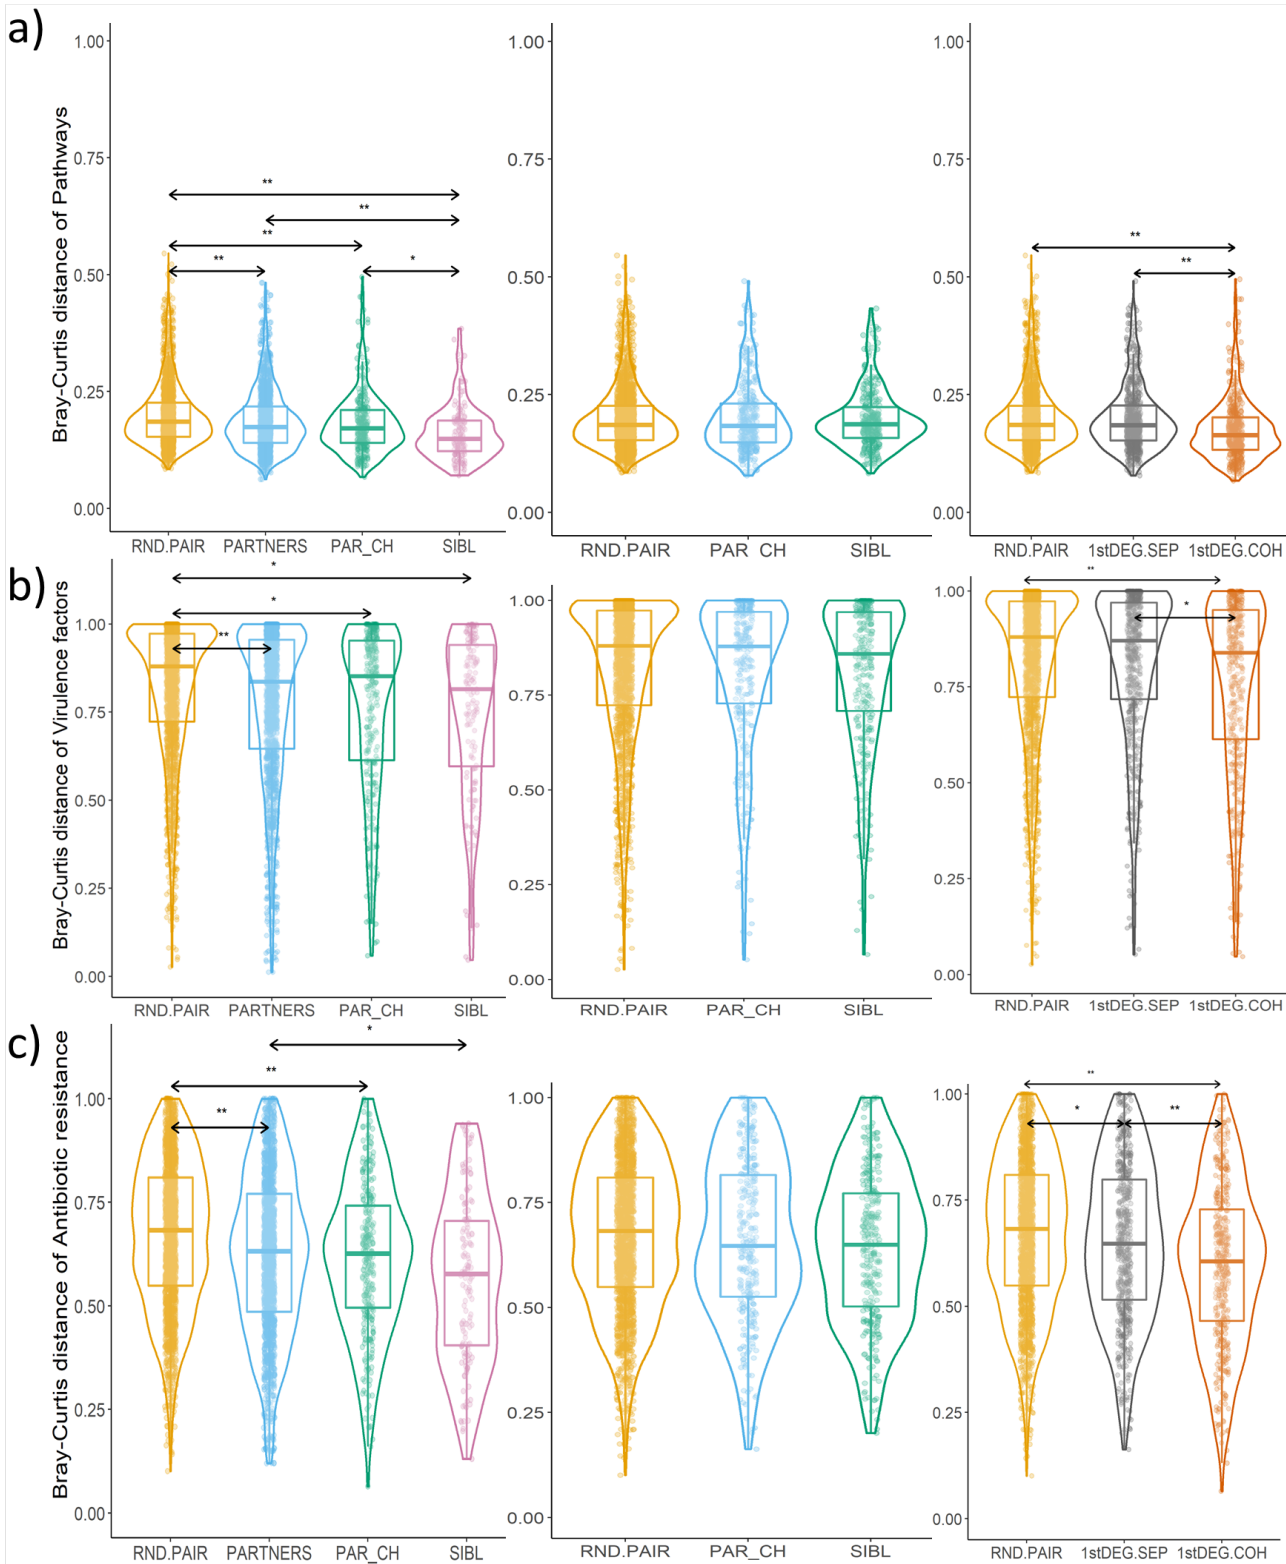

**Supplementary figure 4: Bray-curtis distances of microbiome features of cohabiting and non-cohabiting participants**

Pairwise microbiome Bray-Curtis dissimilarity comparisons of groups of random, non-cohabiting, pairs (RND.PAIR) compared to cohabitating partners (PARTNERS), cohabiting parent-child pairs (PAR\_CH) and cohabiting siblings (SIBL); non-cohabiting random pairs, parent-child pairs and sibling pairs; and random pairs compared to non-cohabiting 1<sup>st</sup> degree relatives (1stDEG.SEP) and cohabiting 1<sup>st</sup> degree relatives (1stDEG.COH). **a**, MetaCyc pathways, **b**, Virulence factor gene families, and **c**, antibiotic resistance gene families. Significantly different groups are marked with \*\* for FDR < 1.0e-5 or \* for FDR < 0.05.



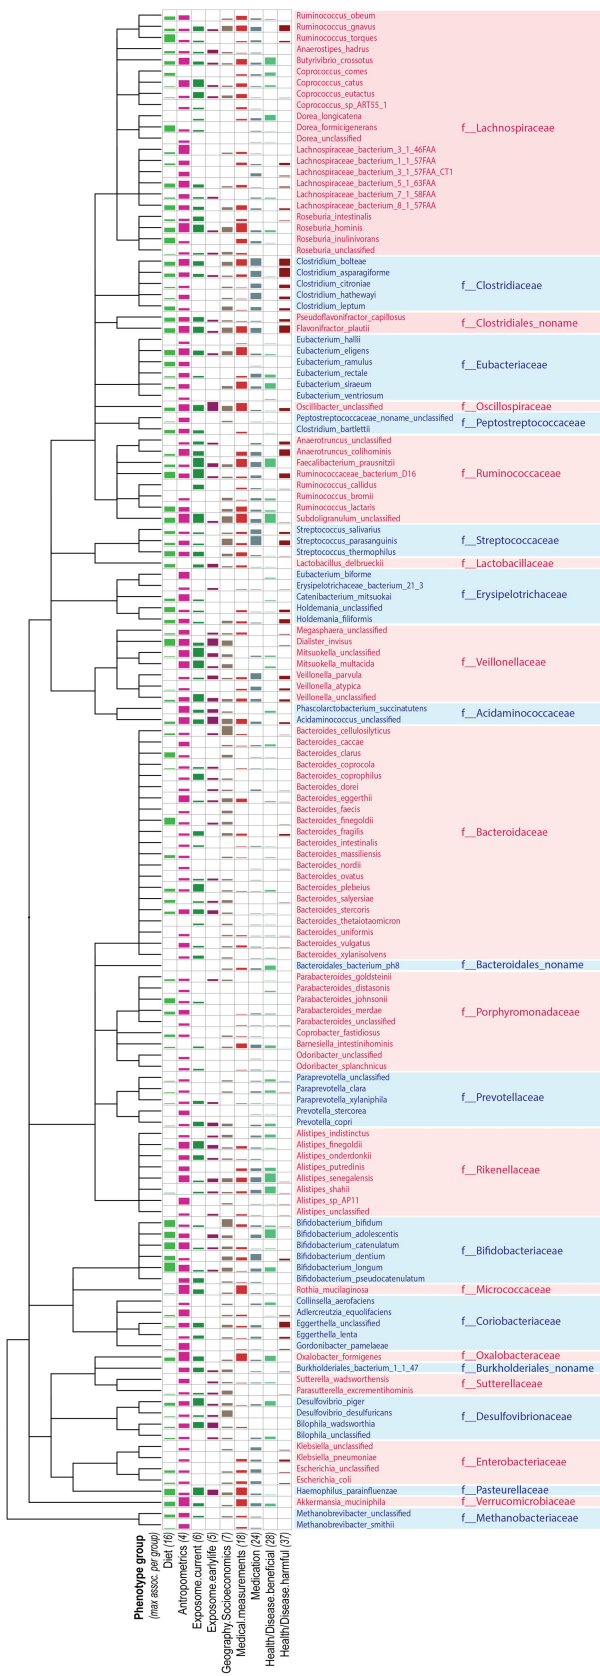

**Supplementary figure 5: Overview of microbiome-phenotype associations**

Figure shows a number of study-wide significant associations ( $FDR < 0.05$ ) per phenotype group, clustered by taxonomy, with bar sizes representing the number of associations relative to maximal number of associations for the phenotype group.

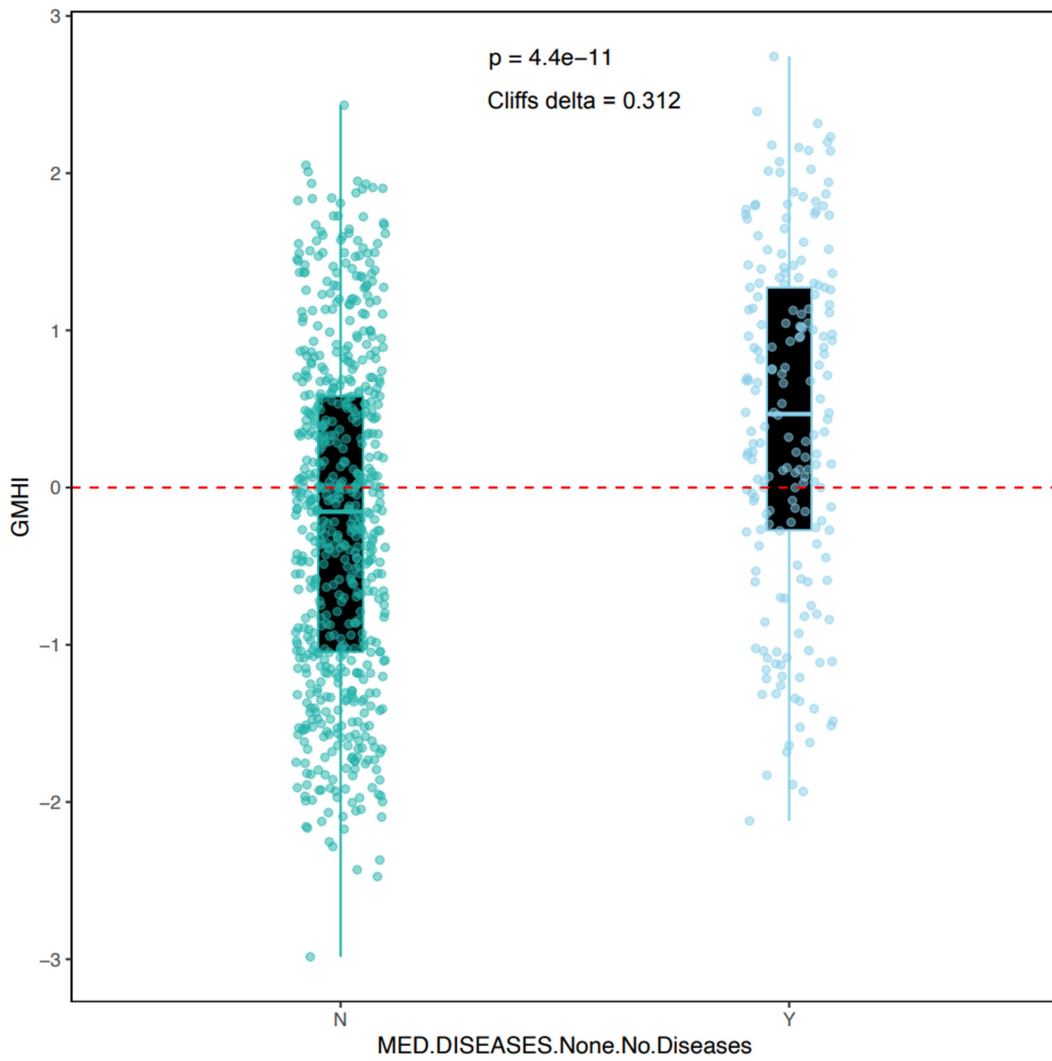

**Supplementary figure 6: Gut Microbiome Health Index calculated for DMP cohort**

Figure shows box-plots of Gut Microbiome Health Index (GMHI) for healthy participants of DMP cohort samples (Y) vs participants who reported one or more diseases (N).

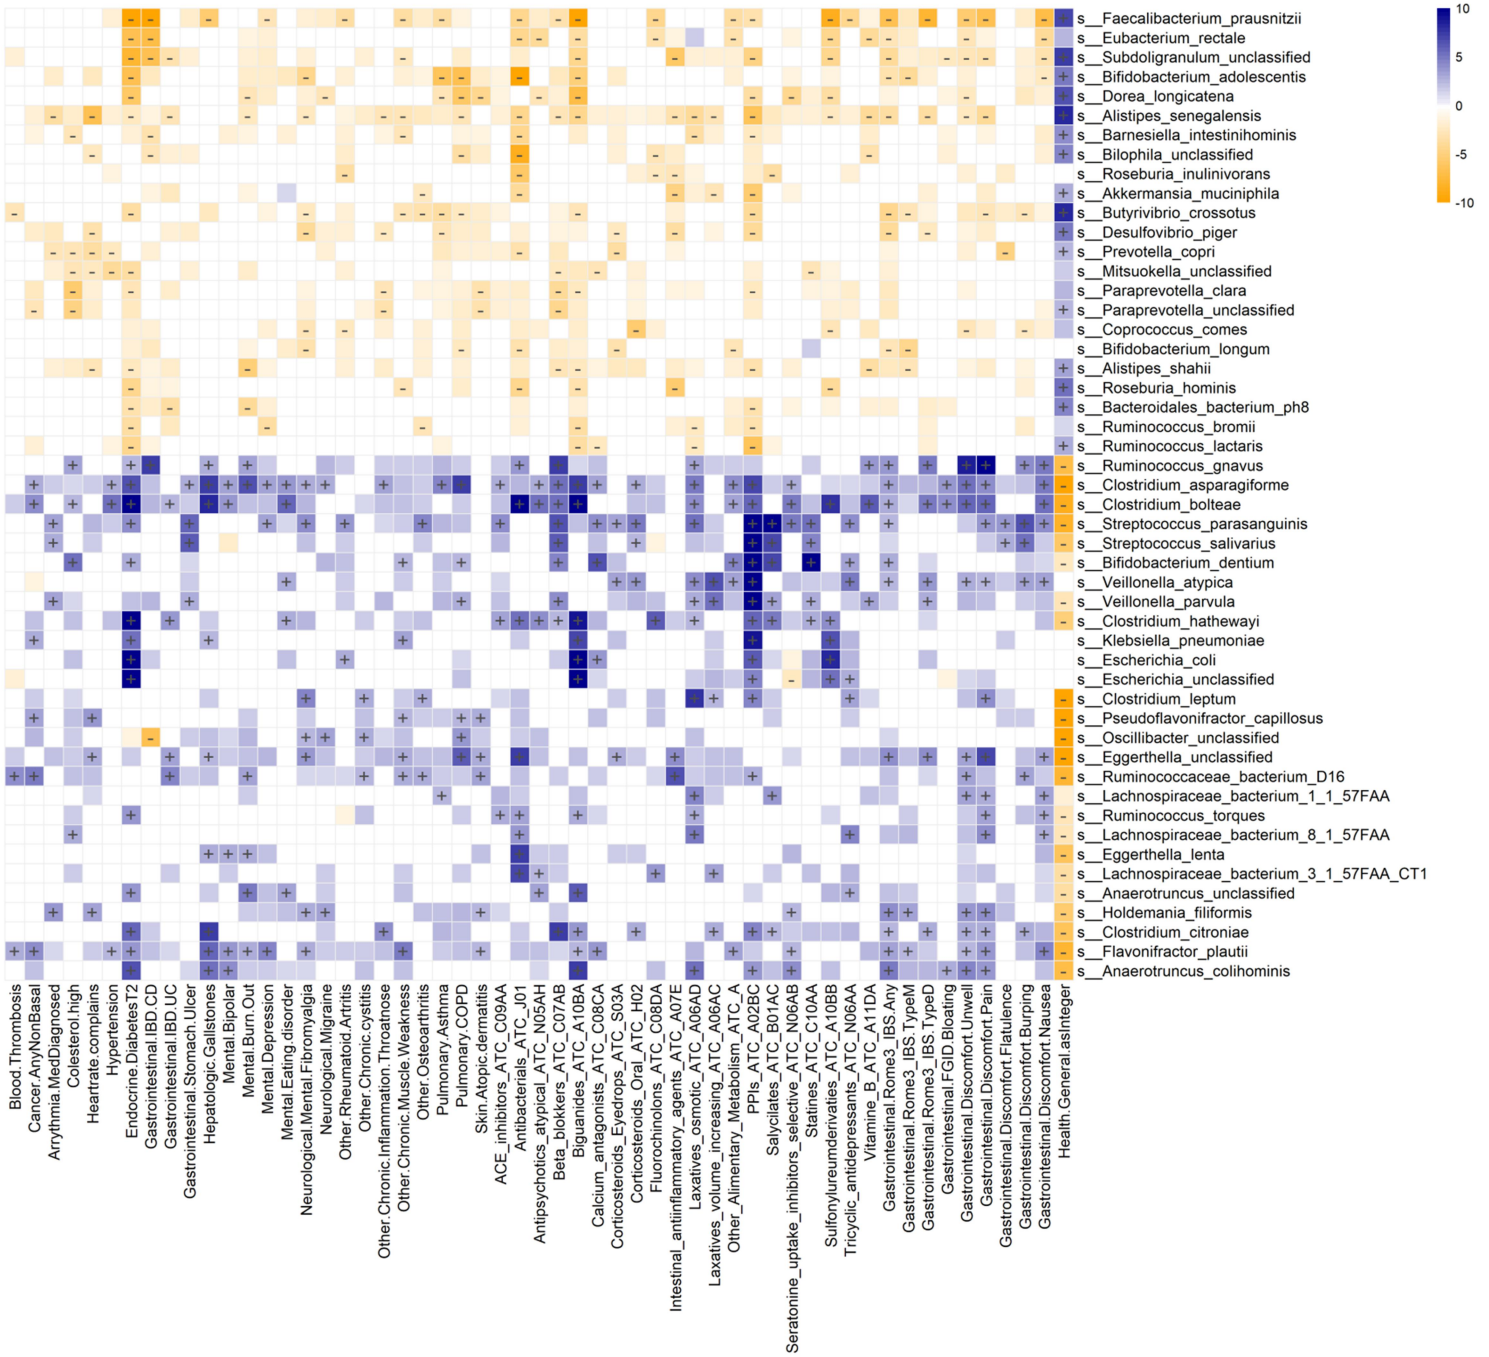

**Figure S7: Microbiome associations with diseases and medication use**

Heatmap displays microbiome-phenotype associations, with microbial species clustered by association p-value using hierarchical clustering and colored by the direction of association. Study-wide significant associations (FDR < 0.05) are marked with +/-, while colored associations without label mark nominally significant associations (p-value < 0.05).

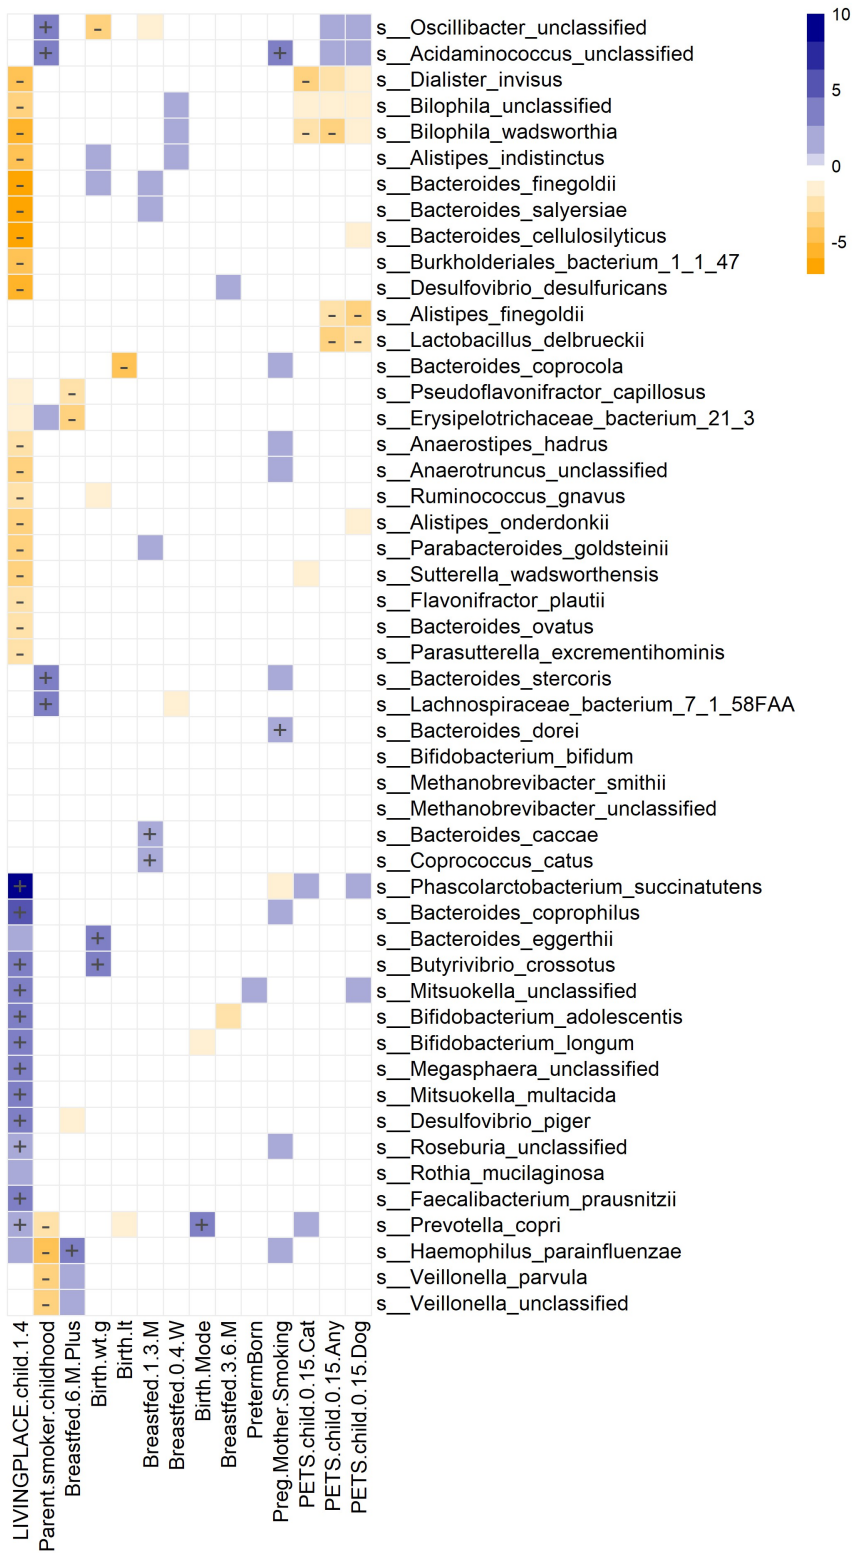

**Figure S8: Microbiome association with early-life exposures**

Heatmap displays microbiome-phenotype associations, with microbial species clustered by association p-value using hierarchical clustering and colored by the direction of association. Study-wide significant associations ( $FDR < 0.05$ ) are marked with +/-, while colored associations without label mark nominally significant associations ( $p\text{-value} < 0.05$ ).

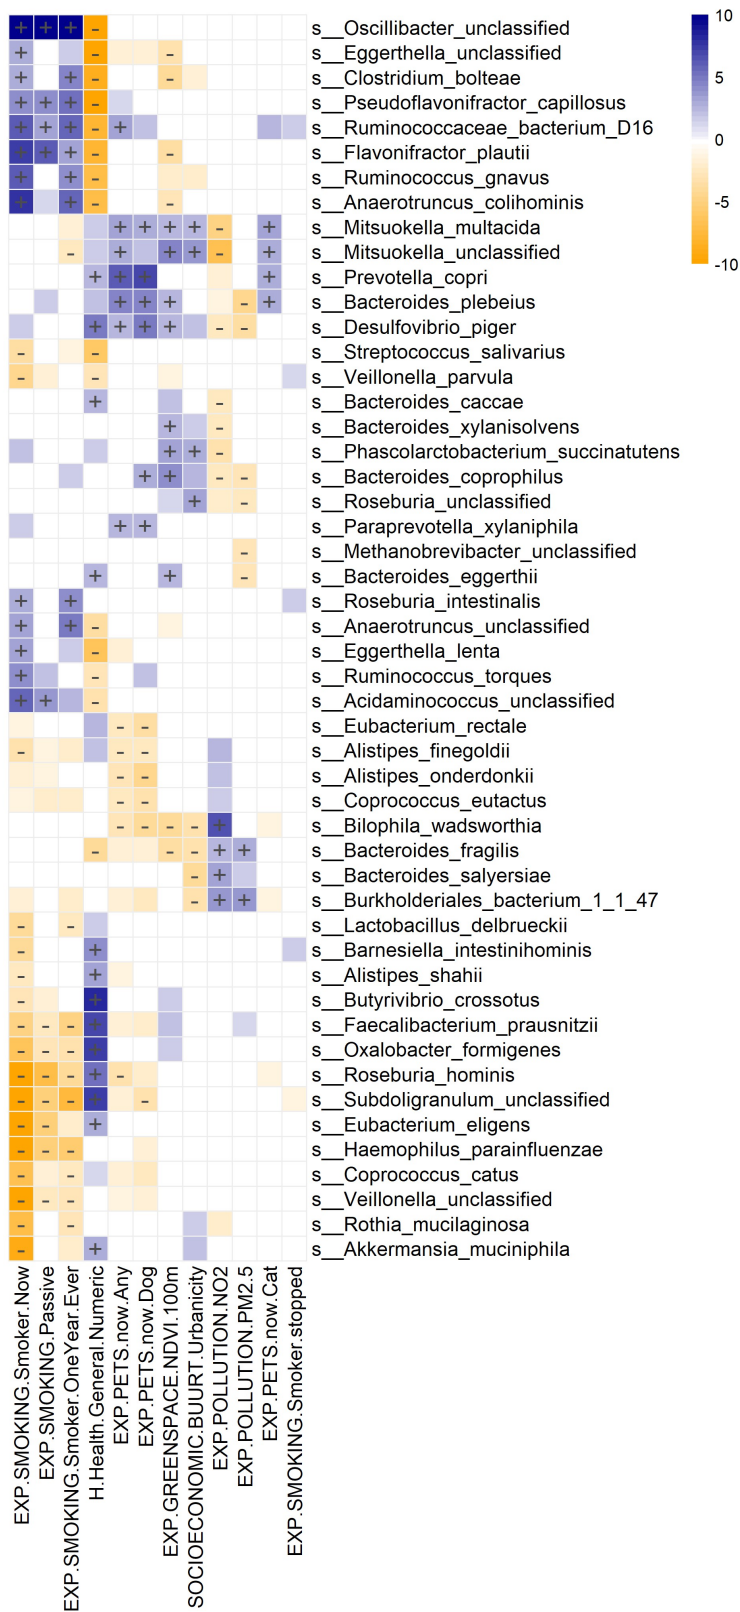

**Figure S9: Microbiome association with smoking, pollutants and greenspace**

Heatmap displays microbiome-phenotype associations, with microbial species clustered by association p-value using hierarchical clustering and colored by the direction of association. Study-wide significant associations (FDR < 0.05) are marked with +/-, while colored associations without label mark nominally significant associations (p-value < 0.05).



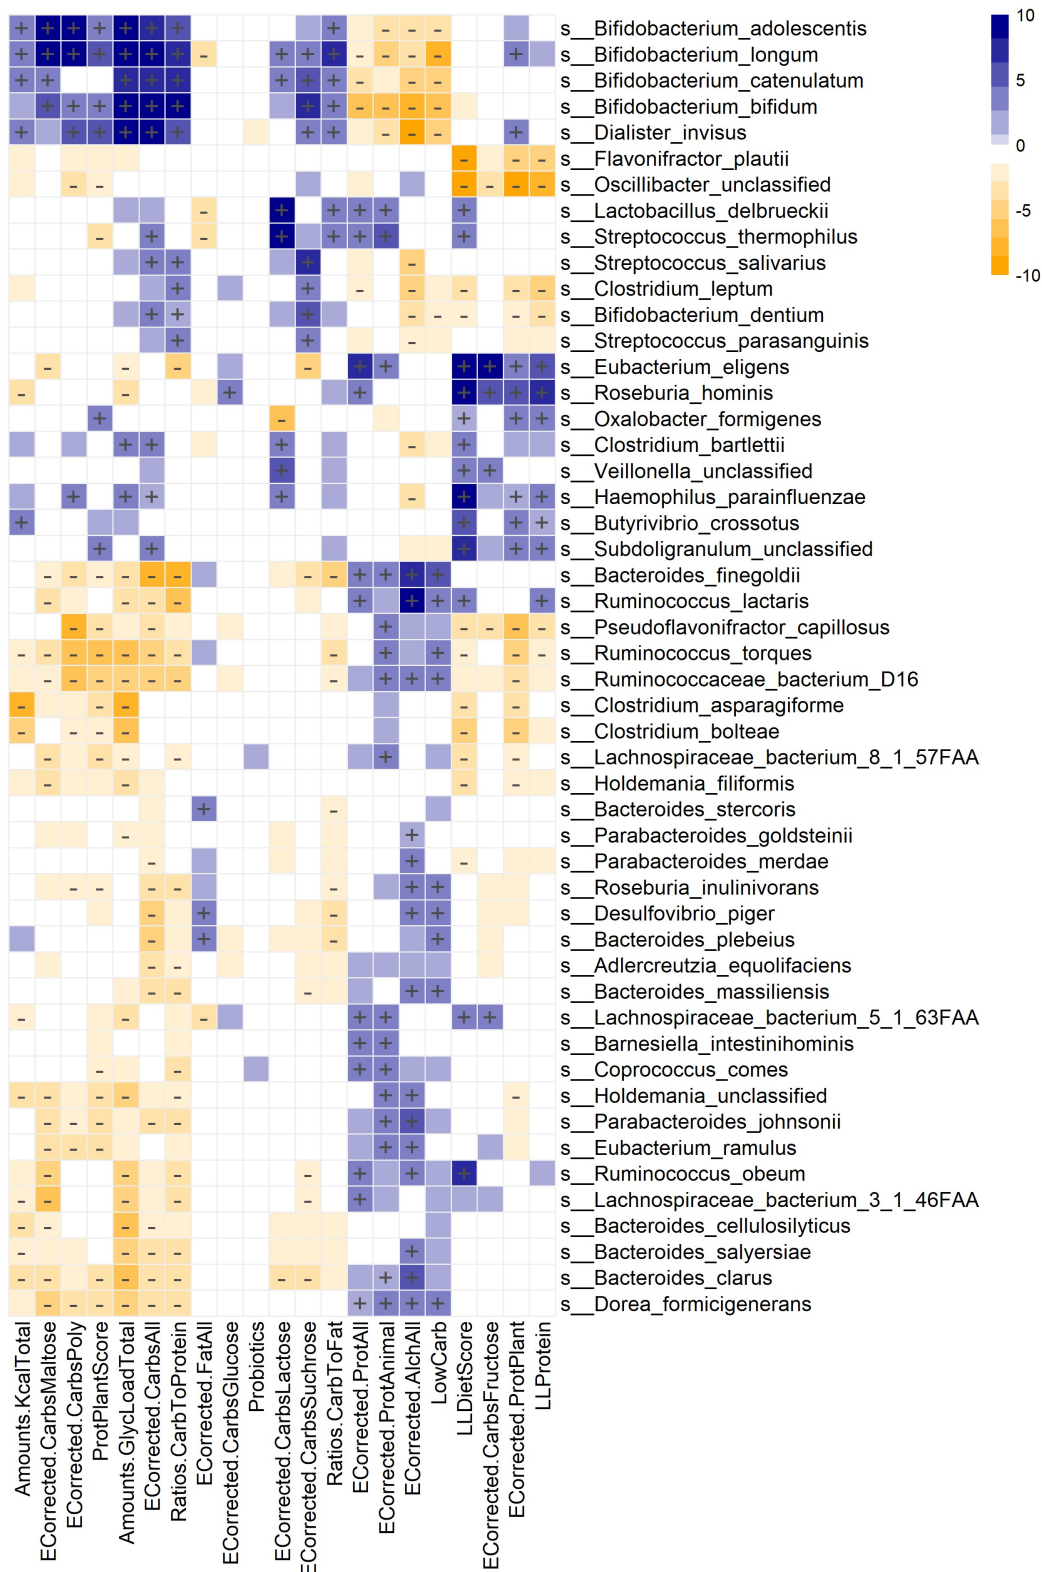

**Figure S10: Microbiome association with diet**

Heatmap displays microbiome-phenotype associations, with microbial species clustered by association p-value using hierarchical clustering and colored by the direction of association. Study-wide significant associations (FDR < 0.05) are marked with +/-, while colored associations without label mark nominally significant associations (p-value < 0.05).
