# Supplementary material for: The Dutch Microbiome Project defines factors that shape the healthy gut microbiome
Source: bioRxiv preprint, doi:10.1101/2020.11.27.401125, version 1 (2020-11-27)
Supplement: Supplementary Tables [file 401125_file04.xlsx]

## Sheet: Data_description
Table	Description
S1A	summary statistics of microbiome data (taxa)
S1B	summary statistics of microbiome data (pathways)
S1C	summary statistics of microbiome data (antibiotic resistance genes)
S1D	summary statistics of microbiome data (virulence factors)
S1E	species co-abundance network and keystone taxa
S1F	pathways co-abundance network and keystone pathways
S2A	summary statistics of metadata (categorical variables)
S2B	summary statistics of metadata (numerical variables)
S2C	correlations between metadata variables
S2D	metadata groups
S3A	results of association analysis: phenotypes VS microbiome alpha diversity
S3B	results of association analysis: phenotypes VS relative abundances of microbial taxa
S3C	results of association analysis: phenotypes VS biochemical pathways encoded in microbiome (MetaCyc classification)
S3D	results of association analysis: phenotypes VS antibiotic resistance gene families (CARD classification)
S3E	results of association analysis: phenotypes VS virulence factor gene families (VFDB classification)
S3F	summary of association results: numbers of associations per phenotype group
S3G	summary of association results: numbers of associations per phenotype
S3H	summary of association results: numbers of associations per microbiome feature
S4A	microbiome composition (species level) beta-diversity variance explained by phenotypes
S4B	microbiome function (MetaCyc pathways) beta-diversity variance explained by phenotypes
S4C	microbiome composition and function beta-diversity variance explained by phenotype groups, multivariate analysis
S5	microbiome heritablility
S6A	lasso-regression microbiome model for prediction of health and diseases
S6B	predictions of diseases from microbiome features
S6C	microbiome patterns shared across diseases
S7	microbiome-disease-medication models
S8	Diet comparison between T-5 years and current collection time
S9	Correlation of microbiome features with top 2 principal coordinates
S10	Replication of Healthy Microbiome signals with Gut Microbiome Health Index study

## Sheet: S1A
Supplementary Table: Summary statistics of microbiome data (taxa)
Taxon	Taxon_shortname	Taxonomic_level	Mean.Ab	SD.Ab	Min.Ab	Q1.Ab	Median.Ab	Q3.Ab	Max.Ab	Prevalence	Core microbe	Core microbe in [1]	Core microbe in [2] (FGFP)	Core microbe in [3] (TwinsUK)	Core microbe in [4] (LLDeep)	Core microbiome in [5] (HMP)
k__Bacteria|p__Acidobacteria|c__Acidobacteriia	c__Acidobacteriia	C	2.01847e-08	1.83103e-06	0	0	0	0	0.0001661	0.000121521
k__Eukaryota|p__Apicomplexa|c__Aconoidasida	c__Aconoidasida	C	1.0802e-07	5.26383e-06	0	0	0	0	0.0003556	0.000729129
k__Bacteria|p__Actinobacteria|c__Actinobacteria	c__Actinobacteria	C	0.031426	0.0432049	0	0.0073851	0.0177382	0.0377707	0.500554	0.99842
k__Bacteria|p__Proteobacteria|c__Alphaproteobacteria	c__Alphaproteobacteria	C	1.15491e-05	0.000196488	0	0	0	0	0.0106203	0.0150687
k__Bacteria|p__Firmicutes|c__Bacilli	c__Bacilli	C	0.00117734	0.00449958	0	0	3.65e-05	0.0007073	0.168679	0.537489
k__Bacteria|p__Bacteroidetes|c__Bacteroidetes_noname	c__Bacteroidetes_noname	C	4.74007e-07	2.25256e-05	0	0	0	0	0.0018217	0.00133674
k__Bacteria|p__Bacteroidetes|c__Bacteroidia	c__Bacteroidia	C	0.604682	0.175309	0	0.494666	0.626029	0.733833	0.991516	0.999878
k__Bacteria|p__Proteobacteria|c__Betaproteobacteria	c__Betaproteobacteria	C	0.0555785	0.0671573	0	0.0053635	0.031808	0.0820614	0.626725	0.980435
k__Bacteria|p__Candidatus_Saccharibacteria|c__Candidatus_Saccharibacteria_noname	c__Candidatus_Saccharibacteria_noname	C	3.48937e-07	1.33301e-05	0	0	0	0	0.0010889	0.00230891
k__Bacteria|p__Firmicutes|c__Clostridia	c__Clostridia	C	0.227685	0.143545	0.0005516	0.121406	0.195166	0.302279	0.982459	1
k__Eukaryota|p__Apicomplexa|c__Coccidia	c__Coccidia	C	1.57249e-08	1.31781e-06	0	0	0	0	0.0001191	0.000243043
k__Bacteria|p__Cyanobacteria|c__Cyanobacteria_noname	c__Cyanobacteria_noname	C	1.04022e-08	9.43627e-07	0	0	0	0	8.56e-05	0.000121521
k__Bacteria|p__Deferribacteres|c__Deferribacteres	c__Deferribacteres	C	9.77032e-09	8.86304e-07	0	0	0	0	8.04e-05	0.000121521
k__Bacteria|p__Deinococcus_Thermus|c__Deinococci	c__Deinococci	C	2.67469e-08	2.42631e-06	0	0	0	0	0.0002201	0.000121521
k__Bacteria|p__Proteobacteria|c__Deltaproteobacteria	c__Deltaproteobacteria	C	0.018554	0.018848	0	0.0046353	0.0140504	0.0263384	0.225693	0.90898
k__Bacteria|p__Proteobacteria|c__Epsilonproteobacteria	c__Epsilonproteobacteria	C	1.00043e-05	0.00034869	0	0	0	0	0.0258161	0.00874954
k__Bacteria|p__Firmicutes|c__Erysipelotrichia	c__Erysipelotrichia	C	0.000568303	0.00205416	0	0	0.0001131	0.0004438	0.0707051	0.695224
k__Eukaryota|p__Eukaryota_noname|c__Eukaryota_noname	c__Eukaryota_noname	C	1.60429e-06	0.000126912	0	0	0	0	0.0114875	0.00145826
k__Eukaryota|p__Ascomycota|c__Eurotiomycetes	c__Eurotiomycetes	C	2.50157e-06	5.32947e-05	0	0	0	0	0.0019905	0.00352412
k__Bacteria|p__Fusobacteria|c__Fusobacteriia	c__Fusobacteriia	C	2.19843e-05	0.000797892	0	0	0	0	0.040867	0.00498238
k__Bacteria|p__Proteobacteria|c__Gammaproteobacteria	c__Gammaproteobacteria	C	0.0143512	0.0624499	0	0.0001508	0.0008075	0.0035267	0.833565	0.830356
k__Archaea|p__Euryarchaeota|c__Halobacteria	c__Halobacteria	C	1.09519e-06	5.2274e-05	0	0	0	0	0.0043287	0.00133674
k__Archaea|p__Euryarchaeota|c__Methanobacteria	c__Methanobacteria	C	5.21432e-05	0.00110197	0	0	0	0	0.0888851	0.093693
k__Archaea|p__Euryarchaeota|c__Methanomicrobia	c__Methanomicrobia	C	1.38401e-06	6.20794e-05	0	0	0	0	0.0039706	0.00133674
k__Bacteria|p__Tenericutes|c__Mollicutes	c__Mollicutes	C	1.30128e-05	0.000191781	0	0	0	0	0.0062634	0.0119091
k__Bacteria|p__Firmicutes|c__Negativicutes	c__Negativicutes	C	0.0187686	0.0309399	0	0.0007698	0.0081321	0.0234925	0.547559	0.839713
k__Eukaryota|p__Ascomycota|c__Saccharomycetes	c__Saccharomycetes	C	1.11385e-05	0.000117242	0	0	0	0	0.0051959	0.0348767
k__Eukaryota|p__Ascomycota|c__Schizosaccharomycetes	c__Schizosaccharomycetes	C	1.33733e-06	6.26146e-05	0	0	0	0	0.0048664	0.00109369
k__Eukaryota|p__Ascomycota|c__Sordariomycetes	c__Sordariomycetes	C	2.57941e-07	1.0879e-05	0	0	0	0	0.0008138	0.00218739
k__Bacteria|p__Spirochaetes|c__Spirochaetia	c__Spirochaetia	C	0.000241165	0.00739239	0	0	0	0	0.396368	0.00935715
k__Bacteria|p__Synergistetes|c__Synergistia	c__Synergistia	C	4.15271e-05	0.00136546	0	0	0	0	0.0959154	0.00583303
k__Bacteria|p__Thermotogae|c__Thermotogae	c__Thermotogae	C	3.71248e-08	3.36773e-06	0	0	0	0	0.0003055	0.000121521
k__Eukaryota|p__Basidiomycota|c__Tremellomycetes	c__Tremellomycetes	C	2.81565e-08	2.55419e-06	0	0	0	0	0.0002317	0.000121521
k__Bacteria|p__Verrucomicrobia|c__Verrucomicrobiae	c__Verrucomicrobiae	C	0.0223958	0.0445957	0	4.6e-05	0.0040927	0.025468	0.726547	0.781991
k__Viruses|p__Viruses_noname|c__Viruses_noname	c__Viruses_noname	C	0.00440073	0.0211261	0	0	0	0.0007317	0.473541	0.408069
k__Bacteria|p__Proteobacteria|c__Alphaproteobacteria|o__Rhodospirillales|f__Acetobacteraceae	f__Acetobacteraceae	F	8.06789e-06	0.000186685	0	0	0	0	0.0106203	0.00303804
k__Bacteria|p__Firmicutes|c__Negativicutes|o__Selenomonadales|f__Acidaminococcaceae	f__Acidaminococcaceae	F	0.0107747	0.0243702	0	0	0	0.0118591	0.310683	0.35387
k__Bacteria|p__Acidobacteria|c__Acidobacteriia|o__Acidobacteriales|f__Acidobacteriaceae	f__Acidobacteriaceae	F	2.01847e-08	1.83103e-06	0	0	0	0	0.0001661	0.000121521
k__Bacteria|p__Actinobacteria|c__Actinobacteria|o__Actinobacteria_noname|f__Actinobacteria_noname	f__Actinobacteria_noname	F	1.10098e-08	7.84388e-07	0	0	0	0	6.72e-05	0.000243043
k__Bacteria|p__Actinobacteria|c__Actinobacteria|o__Actinomycetales|f__Actinomycetaceae	f__Actinomycetaceae	F	1.44063e-05	0.000127322	0	0	0	0	0.0042142	0.0644064
k__Viruses|p__Viruses_noname|c__Viruses_noname|o__Viruses_noname|f__Adenoviridae	f__Adenoviridae	F	3.06945e-06	0.000159244	0	0	0	0	0.0101544	0.00194434
k__Bacteria|p__Firmicutes|c__Bacilli|o__Lactobacillales|f__Aerococcaceae	f__Aerococcaceae	F	1.9565e-08	1.05007e-06	0	0	0	0	6.82e-05	0.000364564
k__Bacteria|p__Proteobacteria|c__Gammaproteobacteria|o__Aeromonadales|f__Aeromonadaceae	f__Aeromonadaceae	F	1.31417e-05	0.000639827	0	0	0	0	0.0519934	0.00133674
k__Bacteria|p__Proteobacteria|c__Betaproteobacteria|o__Burkholderiales|f__Alcaligenaceae	f__Alcaligenaceae	F	3.36177e-06	0.000274444	0	0	0	0	0.0248614	0.000972172
k__Viruses|p__Viruses_noname|c__Viruses_noname|o__Tymovirales|f__Alphaflexiviridae	f__Alphaflexiviridae	F	0	0	0	0	0	0	0	0
k__Bacteria|p__Proteobacteria|c__Alphaproteobacteria|o__Alphaproteobacteria_noname|f__Alphaproteobacteria_noname	f__Alphaproteobacteria_noname	F	2.00147e-06	5.15869e-05	0	0	0	0	0.0042217	0.00777737
k__Bacteria|p__Proteobacteria|c__Alphaproteobacteria|o__Rickettsiales|f__Anaplasmataceae	f__Anaplasmataceae	F	1.80338e-08	1.16812e-06	0	0	0	0	0.0001003	0.000364564
k__Viruses|p__Viruses_noname|c__Viruses_noname|o__Viruses_noname|f__Anelloviridae	f__Anelloviridae	F	1.3117e-07	1.1899e-05	0	0	0	0	0.0010794	0.000121521
k__Eukaryota|p__Ascomycota|c__Eurotiomycetes|o__Eurotiales|f__Aspergillaceae	f__Aspergillaceae	F	2.50157e-06	5.32947e-05	0	0	0	0	0.0019905	0.00352412
k__Bacteria|p__Firmicutes|c__Bacilli|o__Bacillales|f__Bacillaceae	f__Bacillaceae	F	3.0029e-06	0.000161079	0	0	0	0	0.0144081	0.0034026
k__Bacteria|p__Firmicutes|c__Bacilli|o__Bacillales|f__Bacillales_noname	f__Bacillales_noname	F	7.70932e-08	5.97168e-06	0	0	0	0	0.0005371	0.000364564
k__Bacteria|p__Bacteroidetes|c__Bacteroidia|o__Bacteroidales|f__Bacteroidaceae	f__Bacteroidaceae	F	0.185997	0.156763	0	0.0689013	0.137844	0.258659	0.95863	0.998906
k__Bacteria|p__Bacteroidetes|c__Bacteroidia|o__Bacteroidales|f__Bacteroidales_noname	f__Bacteroidales_noname	F	0.0418079	0.0494884	0	0.0082691	0.0259645	0.0566391	0.484246	0.924171
k__Bacteria|p__Bacteroidetes|c__Bacteroidetes_noname|o__Bacteroidetes_noname|f__Bacteroidetes_noname	f__Bacteroidetes_noname	F	5.27889e-08	4.78869e-06	0	0	0	0	0.0004344	0.000121521
k__Viruses|p__Viruses_noname|c__Viruses_noname|o__Tymovirales|f__Betaflexiviridae	f__Betaflexiviridae	F	0	0	0	0	0	0	0	0
k__Bacteria|p__Actinobacteria|c__Actinobacteria|o__Bifidobacteriales|f__Bifidobacteriaceae	f__Bifidobacteriaceae	F	0.0233394	0.0379534	0	0.0031552	0.0110241	0.0273751	0.491354	0.938267
k__Bacteria|p__Spirochaetes|c__Spirochaetia|o__Spirochaetales|f__Brachyspiraceae	f__Brachyspiraceae	F	2.70978e-06	0.00015238	0	0	0	0	0.0136416	0.00741281
k__Bacteria|p__Actinobacteria|c__Actinobacteria|o__Actinomycetales|f__Brevibacteriaceae	f__Brevibacteriaceae	F	2.80204e-07	1.2941e-05	0	0	0	0	0.0008585	0.000607607
k__Bacteria|p__Proteobacteria|c__Betaproteobacteria|o__Burkholderiales|f__Burkholderiaceae	f__Burkholderiaceae	F	1.36567e-06	4.16048e-05	0	0	0	0	0.003265	0.00558999
k__Bacteria|p__Proteobacteria|c__Betaproteobacteria|o__Burkholderiales|f__Burkholderiales_noname	f__Burkholderiales_noname	F	0.000591482	0.0021261	0	0	0	0.0001922	0.0750831	0.424353
k__Bacteria|p__Proteobacteria|c__Epsilonproteobacteria|o__Campylobacterales|f__Campylobacteraceae	f__Campylobacteraceae	F	5.39555e-06	0.000193893	0	0	0	0	0.014092	0.00607607
k__Bacteria|p__Candidatus_Saccharibacteria|c__Candidatus_Saccharibacteria_noname|o__Candidatus_Saccharibacteria_noname|f__Candidatus_Saccharibacteria_noname	f__Candidatus_Saccharibacteria_noname	F	3.48937e-07	1.33301e-05	0	0	0	0	0.0010889	0.00230891
k__Bacteria|p__Proteobacteria|c__Gammaproteobacteria|o__Cardiobacteriales|f__Cardiobacteriaceae	f__Cardiobacteriaceae	F	1.65998e-08	1.00085e-06	0	0	0	0	6.89e-05	0.000364564
k__Bacteria|p__Firmicutes|c__Bacilli|o__Lactobacillales|f__Carnobacteriaceae	f__Carnobacteriaceae	F	5.56544e-07	1.16783e-05	0	0	0	0	0.0006146	0.00449629
k__Viruses|p__Viruses_noname|c__Viruses_noname|o__Viruses_noname|f__Caulimoviridae	f__Caulimoviridae	F	5.82817e-08	5.28696e-06	0	0	0	0	0.0004796	0.000121521
k__Viruses|p__Viruses_noname|c__Viruses_noname|o__Viruses_noname|f__Circoviridae	f__Circoviridae	F	3.1241e-06	6.03544e-05	0	0	0	0	0.0036586	0.00461782
k__Bacteria|p__Firmicutes|c__Clostridia|o__Clostridiales|f__Clostridiaceae	f__Clostridiaceae	F	0.00121377	0.00515968	0	0	0	0.0003251	0.124782	0.494349
k__Bacteria|p__Firmicutes|c__Clostridia|o__Clostridiales|f__Clostridiales_Family_XI_Incertae_Sedis	f__Clostridiales_Family_XI_Incertae_Sedis	F	8.92332e-08	3.64694e-06	0	0	0	0	0.0002179	0.00085065
k__Bacteria|p__Firmicutes|c__Clostridia|o__Clostridiales|f__Clostridiales_Family_XIII_Incertae_Sedis	f__Clostridiales_Family_XIII_Incertae_Sedis	F	9.03755e-08	3.62155e-06	0	0	0	0	0.0002709	0.000972172
k__Bacteria|p__Firmicutes|c__Clostridia|o__Clostridiales|f__Clostridiales_noname	f__Clostridiales_noname	F	0.000648524	0.00362182	0	0	7.26e-05	0.0003986	0.1778	0.61344
k__Bacteria|p__Proteobacteria|c__Betaproteobacteria|o__Burkholderiales|f__Comamonadaceae	f__Comamonadaceae	F	9.82392e-07	2.23606e-05	0	0	0	0	0.000865	0.00267347
k__Bacteria|p__Actinobacteria|c__Actinobacteria|o__Coriobacteriales|f__Coriobacteriaceae	f__Coriobacteriaceae	F	0.00794714	0.00992863	0	0.0023622	0.0051543	0.009984	0.195359	0.993073
k__Bacteria|p__Actinobacteria|c__Actinobacteria|o__Actinomycetales|f__Corynebacteriaceae	f__Corynebacteriaceae	F	6.67068e-07	2.53596e-05	0	0	0	0	0.0017547	0.00157978
k__Eukaryota|p__Apicomplexa|c__Coccidia|o__Eucoccidiorida|f__Cryptosporidiidae	f__Cryptosporidiidae	F	1.57249e-08	1.31781e-06	0	0	0	0	0.0001191	0.000243043
k__Eukaryota|p__Ascomycota|c__Saccharomycetes|o__Saccharomycetales|f__Debaryomycetaceae	f__Debaryomycetaceae	F	1.86706e-07	1.21913e-05	0	0	0	0	0.0009147	0.000243043
k__Bacteria|p__Deferribacteres|c__Deferribacteres|o__Deferribacterales|f__Deferribacteraceae	f__Deferribacteraceae	F	9.77032e-09	8.86304e-07	0	0	0	0	8.04e-05	0.000121521
k__Bacteria|p__Deinococcus_Thermus|c__Deinococci|o__Deinococcales|f__Deinococcaceae	f__Deinococcaceae	F	2.67469e-08	2.42631e-06	0	0	0	0	0.0002201	0.000121521
k__Bacteria|p__Actinobacteria|c__Actinobacteria|o__Actinomycetales|f__Dermabacteraceae	f__Dermabacteraceae	F	6.8611e-08	6.22397e-06	0	0	0	0	0.0005646	0.000121521
k__Bacteria|p__Actinobacteria|c__Actinobacteria|o__Actinomycetales|f__Dermatophilaceae	f__Dermatophilaceae	F	1.27408e-06	3.18591e-05	0	0	0	0	0.001428	0.00230891
k__Bacteria|p__Proteobacteria|c__Deltaproteobacteria|o__Desulfovibrionales|f__Desulfovibrionaceae	f__Desulfovibrionaceae	F	0.018554	0.018848	0	0.0046353	0.0140504	0.0263384	0.225693	0.90898
k__Viruses|p__Viruses_noname|c__Viruses_noname|o__Viruses_noname|f__Endornaviridae	f__Endornaviridae	F	3.15655e-05	0.000634002	0	0	0	0	0.0231089	0.00595455
k__Bacteria|p__Proteobacteria|c__Gammaproteobacteria|o__Enterobacteriales|f__Enterobacteriaceae	f__Enterobacteriaceae	F	0.0135209	0.0619895	0	0	0.0004389	0.0023146	0.833565	0.745048
k__Bacteria|p__Firmicutes|c__Bacilli|o__Lactobacillales|f__Enterococcaceae	f__Enterococcaceae	F	2.70301e-06	6.34583e-05	0	0	0	0	0.0030688	0.00789889
k__Bacteria|p__Firmicutes|c__Erysipelotrichia|o__Erysipelotrichales|f__Erysipelotrichaceae	f__Erysipelotrichaceae	F	0.000568303	0.00205416	0	0	0.0001131	0.0004438	0.0707051	0.695224
k__Bacteria|p__Proteobacteria|c__Alphaproteobacteria|o__Sphingomonadales|f__Erythrobacteraceae	f__Erythrobacteraceae	F	2.63702e-09	1.69443e-07	0	0	0	0	1.15e-05	0.000243043
k__Bacteria|p__Firmicutes|c__Clostridia|o__Clostridiales|f__Eubacteriaceae	f__Eubacteriaceae	F	0.0325451	0.0464572	0	0.0067623	0.0166786	0.0395987	0.620434	0.992952
k__Eukaryota|p__Eukaryota_noname|c__Eukaryota_noname|o__Eukaryota_noname|f__Eukaryota_noname	f__Eukaryota_noname	F	2.80836e-08	1.67559e-06	0	0	0	0	0.0001102	0.000364564
k__Viruses|p__Viruses_noname|c__Viruses_noname|o__Viruses_noname|f__Flaviviridae	f__Flaviviridae	F	5.3275e-08	2.46434e-06	0	0	0	0	0.0001296	0.000486086
k__Bacteria|p__Fusobacteria|c__Fusobacteriia|o__Fusobacteriales|f__Fusobacteriaceae	f__Fusobacteriaceae	F	2.19747e-05	0.000797465	0	0	0	0	0.040867	0.00498238
k__Viruses|p__Viruses_noname|c__Viruses_noname|o__Viruses_noname|f__Geminiviridae	f__Geminiviridae	F	4.92349e-06	0.000145881	0	0	0	0	0.0095056	0.0034026
k__Eukaryota|p__Apicomplexa|c__Aconoidasida|o__Haemosporida|f__Haemosporida_noname	f__Haemosporida_noname	F	1.0802e-07	5.26383e-06	0	0	0	0	0.0003556	0.000729129
k__Archaea|p__Euryarchaeota|c__Halobacteria|o__Halobacteriales|f__Halobacteriaceae	f__Halobacteriaceae	F	1.09519e-06	5.2274e-05	0	0	0	0	0.0043287	0.00133674
k__Bacteria|p__Proteobacteria|c__Gammaproteobacteria|o__Oceanospirillales|f__Halomonadaceae	f__Halomonadaceae	F	4.88662e-07	1.68013e-05	0	0	0	0	0.0008036	0.000972172
k__Bacteria|p__Proteobacteria|c__Epsilonproteobacteria|o__Campylobacterales|f__Helicobacteraceae	f__Helicobacteraceae	F	4.60874e-06	0.000289896	0	0	0	0	0.0258161	0.00267347
k__Viruses|p__Viruses_noname|c__Viruses_noname|o__Viruses_noname|f__Hepadnaviridae	f__Hepadnaviridae	F	8.34104e-06	0.000132359	0	0	0	0	0.005394	0.00802042
k__Viruses|p__Viruses_noname|c__Viruses_noname|o__Herpesvirales|f__Herpesviridae	f__Herpesviridae	F	1.3038e-07	1.17263e-05	0	0	0	0	0.0010637	0.000243043
k__Eukaryota|p__Eukaryota_noname|c__Eukaryota_noname|o__Eukaryota_noname|f__Hexamitidae	f__Hexamitidae	F	1.64734e-07	8.12986e-06	0	0	0	0	0.0006127	0.00085065
k__Bacteria|p__Proteobacteria|c__Alphaproteobacteria|o__Rhizobiales|f__Hyphomicrobiaceae	f__Hyphomicrobiaceae	F	1.38522e-07	6.51498e-06	0	0	0	0	0.0003765	0.000486086
k__Viruses|p__Viruses_noname|c__Viruses_noname|o__Picornavirales|f__Iflaviridae	f__Iflaviridae	F	9.49326e-08	4.77668e-06	0	0	0	0	0.0003737	0.000607607
k__Bacteria|p__Firmicutes|c__Clostridia|o__Clostridiales|f__Lachnospiraceae	f__Lachnospiraceae	F	0.0274933	0.0481421	0	0.0058997	0.0129301	0.0280217	0.728402	0.999635
k__Bacteria|p__Firmicutes|c__Bacilli|o__Lactobacillales|f__Lactobacillaceae	f__Lactobacillaceae	F	0.000515309	0.0034655	0	0	0	0	0.165404	0.219589
k__Bacteria|p__Fusobacteria|c__Fusobacteriia|o__Fusobacteriales|f__Leptotrichiaceae	f__Leptotrichiaceae	F	9.53943e-09	8.65359e-07	0	0	0	0	7.85e-05	0.000121521
k__Bacteria|p__Firmicutes|c__Bacilli|o__Lactobacillales|f__Leuconostocaceae	f__Leuconostocaceae	F	2.88432e-06	9.74893e-05	0	0	0	0	0.006175	0.00473934
k__Viruses|p__Viruses_noname|c__Viruses_noname|o__Viruses_noname|f__Luteoviridae	f__Luteoviridae	F	7.98609e-06	0.000531404	0	0	0	0	0.0419318	0.000243043
k__Archaea|p__Euryarchaeota|c__Methanobacteria|o__Methanobacteriales|f__Methanobacteriaceae	f__Methanobacteriaceae	F	5.21432e-05	0.00110197	0	0	0	0	0.0888851	0.093693
k__Archaea|p__Euryarchaeota|c__Methanomicrobia|o__Methanomicrobia_noname|f__Methanomicrobia_noname	f__Methanomicrobia_noname	F	1.01198e-06	5.05516e-05	0	0	0	0	0.0039706	0.00121521
k__Archaea|p__Euryarchaeota|c__Methanomicrobia|o__Methanomicrobiales|f__Methanomicrobiaceae	f__Methanomicrobiaceae	F	3.72026e-07	3.36719e-05	0	0	0	0	0.0030545	0.000243043
k__Bacteria|p__Proteobacteria|c__Alphaproteobacteria|o__Rhizobiales|f__Methylobacteriaceae	f__Methylobacteriaceae	F	1.17103e-06	3.14031e-05	0	0	0	0	0.0020906	0.00279499
k__Bacteria|p__Actinobacteria|c__Actinobacteria|o__Actinomycetales|f__Micrococcaceae	f__Micrococcaceae	F	0.000100712	0.000587769	0	0	0	5.1e-06	0.0353303	0.251549
k__Viruses|p__Viruses_noname|c__Viruses_noname|o__Viruses_noname|f__Microviridae	f__Microviridae	F	4.26467e-07	3.86865e-05	0	0	0	0	0.0035094	0.000121521
k__Bacteria|p__Proteobacteria|c__Gammaproteobacteria|o__Pseudomonadales|f__Moraxellaceae	f__Moraxellaceae	F	1.18121e-05	0.000296613	0	0	0	0	0.0227755	0.0115445
k__Bacteria|p__Tenericutes|c__Mollicutes|o__Mycoplasmatales|f__Mycoplasmataceae	f__Mycoplasmataceae	F	1.30128e-05	0.000191781	0	0	0	0	0.0062634	0.0119091
k__Viruses|p__Viruses_noname|c__Viruses_noname|o__Caudovirales|f__Myoviridae	f__Myoviridae	F	5.1113e-05	0.00139259	0	0	0	0	0.0709653	0.00887107
k__Eukaryota|p__Ascomycota|c__Sordariomycetes|o__Hypocreales|f__Nectriaceae	f__Nectriaceae	F	2.57941e-07	1.0879e-05	0	0	0	0	0.0008138	0.00218739
k__Bacteria|p__Proteobacteria|c__Betaproteobacteria|o__Neisseriales|f__Neisseriaceae	f__Neisseriaceae	F	1.74088e-06	6.81301e-05	0	0	0	0	0.0058747	0.00498238
k__Viruses|p__Viruses_noname|c__Viruses_noname|o__Viruses_noname|f__Orthomyxoviridae	f__Orthomyxoviridae	F	4.21031e-06	0.00036119	0	0	0	0	0.0327455	0.000607607
k__Bacteria|p__Cyanobacteria|c__Cyanobacteria_noname|o__Oscillatoriales|f__Oscillatoriales_noname	f__Oscillatoriales_noname	F	1.04022e-08	9.43627e-07	0	0	0	0	8.56e-05	0.000121521
k__Bacteria|p__Firmicutes|c__Clostridia|o__Clostridiales|f__Oscillospiraceae	f__Oscillospiraceae	F	0.0155735	0.0205382	0	0.0044502	0.0096354	0.0198103	0.762409	0.997083
k__Bacteria|p__Proteobacteria|c__Betaproteobacteria|o__Burkholderiales|f__Oxalobacteraceae	f__Oxalobacteraceae	F	0.000291266	0.00126327	0	0	0	0.0001402	0.0374903	0.361283
k__Viruses|p__Viruses_noname|c__Viruses_noname|o__Mononegavirales|f__Paramyxoviridae	f__Paramyxoviridae	F	1.16427e-05	0.000436053	0	0	0	0	0.0244772	0.00121521
k__Viruses|p__Viruses_noname|c__Viruses_noname|o__Viruses_noname|f__Parvoviridae	f__Parvoviridae	F	9.79021e-06	0.000325403	0	0	0	0	0.0166586	0.0017013
k__Bacteria|p__Proteobacteria|c__Gammaproteobacteria|o__Pasteurellales|f__Pasteurellaceae	f__Pasteurellaceae	F	0.000654581	0.0058709	0	0	0	0.0001482	0.341881	0.324098
k__Bacteria|p__Firmicutes|c__Clostridia|o__Clostridiales|f__Peptostreptococcaceae	f__Peptostreptococcaceae	F	8.30618e-05	0.000601781	0	0	0	0	0.0387581	0.127233
k__Viruses|p__Viruses_noname|c__Viruses_noname|o__Caudovirales|f__Podoviridae	f__Podoviridae	F	2.74323e-05	0.0012269	0	0	0	0	0.104169	0.0215093
k__Viruses|p__Viruses_noname|c__Viruses_noname|o__Viruses_noname|f__Polyomaviridae	f__Polyomaviridae	F	2.81388e-06	0.000161974	0	0	0	0	0.0140018	0.000729129
k__Bacteria|p__Bacteroidetes|c__Bacteroidia|o__Bacteroidales|f__Porphyromonadaceae	f__Porphyromonadaceae	F	0.0475029	0.0383582	0	0.0219992	0.0388095	0.0619211	0.62592	0.991615
k__Viruses|p__Viruses_noname|c__Viruses_noname|o__Viruses_noname|f__Potyviridae	f__Potyviridae	F	1.50376e-06	6.76073e-05	0	0	0	0	0.0057698	0.00182282
k__Bacteria|p__Bacteroidetes|c__Bacteroidia|o__Bacteroidales|f__Prevotellaceae	f__Prevotellaceae	F	0.0870734	0.165146	0	0.0001229	0.013139	0.0745021	0.948746	0.851501
k__Bacteria|p__Actinobacteria|c__Actinobacteria|o__Actinomycetales|f__Propionibacteriaceae	f__Propionibacteriaceae	F	2.20288e-05	0.000161754	0	0	0	0	0.0071301	0.0516466
k__Bacteria|p__Proteobacteria|c__Gammaproteobacteria|o__Alteromonadales|f__Pseudoalteromonadaceae	f__Pseudoalteromonadaceae	F	2.8436e-09	2.57954e-07	0	0	0	0	2.34e-05	0.000121521
k__Bacteria|p__Proteobacteria|c__Gammaproteobacteria|o__Pseudomonadales|f__Pseudomonadaceae	f__Pseudomonadaceae	F	0.000113841	0.00219413	0	0	0	0	0.116671	0.0460566
k__Bacteria|p__Actinobacteria|c__Actinobacteria|o__Actinomycetales|f__Pseudonocardiaceae	f__Pseudonocardiaceae	F	3.35156e-08	3.04033e-06	0	0	0	0	0.0002758	0.000121521
k__Viruses|p__Viruses_noname|c__Viruses_noname|o__Viruses_noname|f__Reoviridae	f__Reoviridae	F	2.36977e-06	0.000137306	0	0	0	0	0.0120135	0.00085065
k__Viruses|p__Viruses_noname|c__Viruses_noname|o__Viruses_noname|f__Retroviridae	f__Retroviridae	F	0.0002422	0.00395271	0	0	0	0	0.291776	0.0753433
k__Bacteria|p__Proteobacteria|c__Alphaproteobacteria|o__Rhizobiales|f__Rhizobiaceae	f__Rhizobiaceae	F	3.16199e-08	2.29722e-06	0	0	0	0	0.0001993	0.000243043
k__Bacteria|p__Proteobacteria|c__Alphaproteobacteria|o__Rhodobacterales|f__Rhodobacteraceae	f__Rhodobacteraceae	F	6.33127e-09	5.74334e-07	0	0	0	0	5.21e-05	0.000121521
k__Bacteria|p__Proteobacteria|c__Alphaproteobacteria|o__Rhizobiales|f__Rhodobiaceae	f__Rhodobiaceae	F	3.90084e-09	3.5386e-07	0	0	0	0	3.21e-05	0.000121521
k__Bacteria|p__Bacteroidetes|c__Bacteroidetes_noname|o__Bacteroidetes_Order_II_Incertae_sedis|f__Rhodothermaceae	f__Rhodothermaceae	F	4.21218e-07	2.20117e-05	0	0	0	0	0.0018217	0.00121521
k__Bacteria|p__Proteobacteria|c__Alphaproteobacteria|o__Rickettsiales|f__Rickettsiaceae	f__Rickettsiaceae	F	9.21619e-08	8.36036e-06	0	0	0	0	0.0007584	0.000121521
k__Bacteria|p__Bacteroidetes|c__Bacteroidia|o__Bacteroidales|f__Rikenellaceae	f__Rikenellaceae	F	0.242301	0.143654	0	0.136476	0.227512	0.333247	0.926851	0.998785
k__Bacteria|p__Actinobacteria|c__Actinobacteria|o__Rubrobacterales|f__Rubrobacteraceae	f__Rubrobacteraceae	F	2.26516e-08	2.05481e-06	0	0	0	0	0.0001864	0.000121521
k__Bacteria|p__Firmicutes|c__Clostridia|o__Clostridiales|f__Ruminococcaceae	f__Ruminococcaceae	F	0.150128	0.105525	0.00016	0.0713272	0.124592	0.202384	0.706799	1
k__Eukaryota|p__Ascomycota|c__Saccharomycetes|o__Saccharomycetales|f__Saccharomycetaceae	f__Saccharomycetaceae	F	1.05302e-05	0.000109497	0	0	0	0	0.0051959	0.0346336
k__Eukaryota|p__Ascomycota|c__Saccharomycetes|o__Saccharomycetales|f__Saccharomycetales_noname	f__Saccharomycetales_noname	F	4.21667e-07	3.18901e-05	0	0	0	0	0.0028475	0.000364564
k__Eukaryota|p__Ascomycota|c__Schizosaccharomycetes|o__Schizosaccharomycetales|f__Schizosaccharomycetaceae	f__Schizosaccharomycetaceae	F	1.33733e-06	6.26146e-05	0	0	0	0	0.0048664	0.00109369
k__Viruses|p__Viruses_noname|c__Viruses_noname|o__Caudovirales|f__Siphoviridae	f__Siphoviridae	F	0.00397783	0.0205291	0	0	0	0.000179	0.473541	0.323976
k__Bacteria|p__Proteobacteria|c__Alphaproteobacteria|o__Sphingomonadales|f__Sphingomonadaceae	f__Sphingomonadaceae	F	1.54575e-08	1.40221e-06	0	0	0	0	0.0001272	0.000121521
k__Bacteria|p__Spirochaetes|c__Spirochaetia|o__Spirochaetales|f__Spirochaetaceae	f__Spirochaetaceae	F	0.000238456	0.00739058	0	0	0	0	0.396368	0.00206586
k__Bacteria|p__Firmicutes|c__Bacilli|o__Bacillales|f__Staphylococcaceae	f__Staphylococcaceae	F	8.37e-06	0.000119537	0	0	0	0	0.0061066	0.0153117
k__Bacteria|p__Firmicutes|c__Bacilli|o__Lactobacillales|f__Streptococcaceae	f__Streptococcaceae	F	0.000644417	0.00254484	0	0	0	0.0003028	0.0666985	0.445012
k__Bacteria|p__Proteobacteria|c__Gammaproteobacteria|o__Aeromonadales|f__Succinivibrionaceae	f__Succinivibrionaceae	F	3.44176e-05	0.000728195	0	0	0	0	0.0574506	0.0212663
k__Bacteria|p__Proteobacteria|c__Betaproteobacteria|o__Burkholderiales|f__Sutterellaceae	f__Sutterellaceae	F	0.0546883	0.067557	0	0.002961	0.0311936	0.0818765	0.626725	0.969377
k__Bacteria|p__Synergistetes|c__Synergistia|o__Synergistales|f__Synergistaceae	f__Synergistaceae	F	4.15271e-05	0.00136546	0	0	0	0	0.0959154	0.00583303
k__Viruses|p__Viruses_noname|c__Viruses_noname|o__Viruses_noname|f__Tectiviridae	f__Tectiviridae	F	1.06805e-06	9.68871e-05	0	0	0	0	0.008789	0.000121521
k__Bacteria|p__Thermotogae|c__Thermotogae|o__Thermotogales|f__Thermotogaceae	f__Thermotogaceae	F	3.71248e-08	3.36773e-06	0	0	0	0	0.0003055	0.000121521
k__Viruses|p__Viruses_noname|c__Viruses_noname|o__Viruses_noname|f__Totiviridae	f__Totiviridae	F	0	0	0	0	0	0	0	0
k__Eukaryota|p__Basidiomycota|c__Tremellomycetes|o__Tremellales|f__Tremellaceae	f__Tremellaceae	F	2.81565e-08	2.55419e-06	0	0	0	0	0.0002317	0.000121521
k__Eukaryota|p__Eukaryota_noname|c__Eukaryota_noname|o__Kinetoplastida|f__Trypanosomatidae	f__Trypanosomatidae	F	1.41147e-06	0.000126642	0	0	0	0	0.0114875	0.000243043
k__Bacteria|p__Firmicutes|c__Negativicutes|o__Selenomonadales|f__Veillonellaceae	f__Veillonellaceae	F	0.00799391	0.019415	0	0	0.0014461	0.0086308	0.547559	0.687568
k__Bacteria|p__Verrucomicrobia|c__Verrucomicrobiae|o__Verrucomicrobiales|f__Verrucomicrobiaceae	f__Verrucomicrobiaceae	F	0.0223958	0.0445957	0	4.6e-05	0.0040927	0.025468	0.726547	0.781991
k__Bacteria|p__Proteobacteria|c__Gammaproteobacteria|o__Vibrionales|f__Vibrionaceae	f__Vibrionaceae	F	1.11676e-06	4.00514e-05	0	0	0	0	0.003232	0.00279499
k__Viruses|p__Viruses_noname|c__Viruses_noname|o__Viruses_noname|f__Viruses_noname	f__Viruses_noname	F	8.85094e-06	0.000415997	0	0	0	0	0.0335808	0.00182282
k__Bacteria|p__Proteobacteria|c__Gammaproteobacteria|o__Xanthomonadales|f__Xanthomonadaceae	f__Xanthomonadaceae	F	9.19565e-07	5.56262e-05	0	0	0	0	0.0048546	0.00109369
k__Bacteria|p__Firmicutes|c__Bacilli|o__Lactobacillales|f__Aerococcaceae|g__Abiotrophia	g__Abiotrophia	G	6.57431e-09	5.96381e-07	0	0	0	0	5.41e-05	0.000121521
k__Bacteria|p__Proteobacteria|c__Alphaproteobacteria|o__Rhodospirillales|f__Acetobacteraceae|g__Acetobacter	g__Acetobacter	G	7.91867e-06	0.000184813	0	0	0	0	0.0106203	0.00303804
k__Bacteria|p__Proteobacteria|c__Betaproteobacteria|o__Burkholderiales|f__Alcaligenaceae|g__Achromobacter	g__Achromobacter	G	5.75039e-08	4.49237e-06	0	0	0	0	0.0004011	0.000243043
k__Bacteria|p__Firmicutes|c__Negativicutes|o__Selenomonadales|f__Acidaminococcaceae|g__Acidaminococcaceae_unclassified	g__Acidaminococcaceae_unclassified	G	5.85282e-05	0.000550084	0	0	0	0	0.0152258	0.031231
k__Bacteria|p__Firmicutes|c__Negativicutes|o__Selenomonadales|f__Acidaminococcaceae|g__Acidaminococcus	g__Acidaminococcus	G	0.00233692	0.0128572	0	0	0	0	0.284364	0.118362
k__Bacteria|p__Acidobacteria|c__Acidobacteriia|o__Acidobacteriales|f__Acidobacteriaceae|g__Acidobacteriaceae_unclassified	g__Acidobacteriaceae_unclassified	G	2.01847e-08	1.83103e-06	0	0	0	0	0.0001661	0.000121521
k__Bacteria|p__Proteobacteria|c__Gammaproteobacteria|o__Pseudomonadales|f__Moraxellaceae|g__Acinetobacter	g__Acinetobacter	G	1.18011e-05	0.000296612	0	0	0	0	0.0227755	0.0113015
k__Bacteria|p__Proteobacteria|c__Gammaproteobacteria|o__Pasteurellales|f__Pasteurellaceae|g__Actinobacillus	g__Actinobacillus	G	1.29211e-05	0.00102666	0	0	0	0	0.0930967	0.00522542
k__Bacteria|p__Actinobacteria|c__Actinobacteria|o__Actinobacteria_noname|f__Actinobacteria_noname|g__Actinobacteria_noname	g__Actinobacteria_noname	G	1.10098e-08	7.84388e-07	0	0	0	0	6.72e-05	0.000243043
k__Bacteria|p__Actinobacteria|c__Actinobacteria|o__Actinomycetales|f__Actinomycetaceae|g__Actinobaculum	g__Actinobaculum	G	3.2908e-08	2.98521e-06	0	0	0	0	0.0002708	0.000121521
k__Bacteria|p__Actinobacteria|c__Actinobacteria|o__Actinomycetales|f__Actinomycetaceae|g__Actinomyces	g__Actinomyces	G	1.4344e-05	0.000126695	0	0	0	0	0.0042142	0.0641633
k__Bacteria|p__Actinobacteria|c__Actinobacteria|o__Coriobacteriales|f__Coriobacteriaceae|g__Adlercreutzia	g__Adlercreutzia	G	0.000265558	0.000842259	0	0	0	0.0002202	0.0379789	0.450115
k__Bacteria|p__Firmicutes|c__Bacilli|o__Lactobacillales|f__Aerococcaceae|g__Aerococcus	g__Aerococcus	G	1.29906e-08	8.64378e-07	0	0	0	0	6.82e-05	0.000243043
k__Bacteria|p__Proteobacteria|c__Gammaproteobacteria|o__Aeromonadales|f__Aeromonadaceae|g__Aeromonas	g__Aeromonas	G	1.31417e-05	0.000639827	0	0	0	0	0.0519934	0.00133674
k__Bacteria|p__Proteobacteria|c__Gammaproteobacteria|o__Pasteurellales|f__Pasteurellaceae|g__Aggregatibacter	g__Aggregatibacter	G	1.23892e-06	4.05011e-05	0	0	0	0	0.0032655	0.00546847
k__Bacteria|p__Verrucomicrobia|c__Verrucomicrobiae|o__Verrucomicrobiales|f__Verrucomicrobiaceae|g__Akkermansia	g__Akkermansia	G	0.0223958	0.0445957	0	4.6e-05	0.0040927	0.025468	0.726547	0.781991
k__Bacteria|p__Proteobacteria|c__Betaproteobacteria|o__Burkholderiales|f__Comamonadaceae|g__Alicycliphilus	g__Alicycliphilus	G	3.07996e-07	1.28506e-05	0	0	0	0	0.000865	0.000729129
k__Bacteria|p__Bacteroidetes|c__Bacteroidia|o__Bacteroidales|f__Rikenellaceae|g__Alistipes	g__Alistipes	G	0.242301	0.143654	0	0.136476	0.227512	0.333247	0.926851	0.998785
k__Viruses|p__Viruses_noname|c__Viruses_noname|o__Tymovirales|f__Alphaflexiviridae|g__Allexivirus	g__Allexivirus	G	0	0	0	0	0	0	0	0
k__Bacteria|p__Bacteroidetes|c__Bacteroidia|o__Bacteroidales|f__Prevotellaceae|g__Alloprevotella	g__Alloprevotella	G	8.18082e-08	4.78099e-06	0	0	0	0	0.0003982	0.000486086
k__Bacteria|p__Actinobacteria|c__Actinobacteria|o__Bifidobacteriales|f__Bifidobacteriaceae|g__Alloscardovia	g__Alloscardovia	G	1.02268e-06	3.36969e-05	0	0	0	0	0.0021104	0.00303804
k__Bacteria|p__Proteobacteria|c__Alphaproteobacteria|o__Alphaproteobacteria_noname|f__Alphaproteobacteria_noname|g__Alphaproteobacteria_noname	g__Alphaproteobacteria_noname	G	6.60348e-08	5.23257e-06	0	0	0	0	0.0004719	0.000364564
k__Viruses|p__Viruses_noname|c__Viruses_noname|o__Viruses_noname|f__Retroviridae|g__Alpharetrovirus	g__Alpharetrovirus	G	4.17475e-07	1.39602e-05	0	0	0	0	0.0007921	0.00109369
k__Bacteria|p__Actinobacteria|c__Actinobacteria|o__Actinomycetales|f__Pseudonocardiaceae|g__Amycolatopsis	g__Amycolatopsis	G	3.35156e-08	3.04033e-06	0	0	0	0	0.0002758	0.000121521
k__Bacteria|p__Firmicutes|c__Negativicutes|o__Selenomonadales|f__Veillonellaceae|g__Anaeroglobus	g__Anaeroglobus	G	2.54343e-06	0.000201976	0	0	0	0	0.0182136	0.000607607
k__Bacteria|p__Firmicutes|c__Clostridia|o__Clostridiales|f__Lachnospiraceae|g__Anaerostipes	g__Anaerostipes	G	2.46237e-05	0.000159313	0	0	0	0	0.006526	0.0981893
k__Bacteria|p__Firmicutes|c__Clostridia|o__Clostridiales|f__Ruminococcaceae|g__Anaerotruncus	g__Anaerotruncus	G	8.28658e-05	0.000360433	0	0	0	0	0.0145563	0.185928
k__Bacteria|p__Proteobacteria|c__Epsilonproteobacteria|o__Campylobacterales|f__Campylobacteraceae|g__Arcobacter	g__Arcobacter	G	5.57443e-07	3.67077e-05	0	0	0	0	0.0032058	0.000486086
k__Bacteria|p__Cyanobacteria|c__Cyanobacteria_noname|o__Oscillatoriales|f__Oscillatoriales_noname|g__Arthrospira	g__Arthrospira	G	1.04022e-08	9.43627e-07	0	0	0	0	8.56e-05	0.000121521
k__Eukaryota|p__Ascomycota|c__Eurotiomycetes|o__Eurotiales|f__Aspergillaceae|g__Aspergillaceae_unclassified	g__Aspergillaceae_unclassified	G	2.49727e-06	5.32935e-05	0	0	0	0	0.0019905	0.0034026
k__Bacteria|p__Actinobacteria|c__Actinobacteria|o__Coriobacteriales|f__Coriobacteriaceae|g__Atopobium	g__Atopobium	G	5.09211e-07	1.66932e-05	0	0	0	0	0.0012673	0.00328108
k__Bacteria|p__Firmicutes|c__Bacilli|o__Bacillales|f__Bacillaceae|g__Bacillus	g__Bacillus	G	2.9896e-06	0.000161074	0	0	0	0	0.0144081	0.00328108
k__Bacteria|p__Bacteroidetes|c__Bacteroidia|o__Bacteroidales|f__Bacteroidales_noname|g__Bacteroidales_noname	g__Bacteroidales_noname	G	0.0418079	0.0494884	0	0.0082691	0.0259645	0.0566391	0.484246	0.924171
k__Bacteria|p__Bacteroidetes|c__Bacteroidia|o__Bacteroidales|f__Bacteroidaceae|g__Bacteroides	g__Bacteroides	G	0.185997	0.156763	0	0.0689013	0.137844	0.258659	0.95863	0.998906
k__Bacteria|p__Bacteroidetes|c__Bacteroidetes_noname|o__Bacteroidetes_noname|f__Bacteroidetes_noname|g__Bacteroidetes_noname	g__Bacteroidetes_noname	G	5.27889e-08	4.78869e-06	0	0	0	0	0.0004344	0.000121521
k__Bacteria|p__Bacteroidetes|c__Bacteroidia|o__Bacteroidales|f__Porphyromonadaceae|g__Barnesiella	g__Barnesiella	G	0.0150968	0.0189236	0	0.0022617	0.008643	0.0206706	0.203943	0.884069
k__Viruses|p__Viruses_noname|c__Viruses_noname|o__Viruses_noname|f__Geminiviridae|g__Becurtovirus	g__Becurtovirus	G	2.2799e-06	0.00012724	0	0	0	0	0.0095056	0.000364564
k__Viruses|p__Viruses_noname|c__Viruses_noname|o__Viruses_noname|f__Retroviridae|g__Betaretrovirus	g__Betaretrovirus	G	1.27302e-05	0.000358131	0	0	0	0	0.0211474	0.00315956
k__Bacteria|p__Actinobacteria|c__Actinobacteria|o__Bifidobacteriales|f__Bifidobacteriaceae|g__Bifidobacterium	g__Bifidobacterium	G	0.0233334	0.0379521	0	0.003148	0.0110188	0.0273751	0.491354	0.937295
k__Bacteria|p__Proteobacteria|c__Deltaproteobacteria|o__Desulfovibrionales|f__Desulfovibrionaceae|g__Bilophila	g__Bilophila	G	0.0143625	0.0166125	0	0.0015531	0.0095964	0.0211536	0.216581	0.888079
k__Bacteria|p__Firmicutes|c__Clostridia|o__Clostridiales|f__Lachnospiraceae|g__Blautia	g__Blautia	G	0.00126402	0.00331236	0	0.0001186	0.0005535	0.0013066	0.126551	0.855876
k__Viruses|p__Viruses_noname|c__Viruses_noname|o__Viruses_noname|f__Parvoviridae|g__Bocavirus	g__Bocavirus	G	4.14522e-07	3.76029e-05	0	0	0	0	0.0034111	0.000121521
k__Bacteria|p__Proteobacteria|c__Betaproteobacteria|o__Burkholderiales|f__Alcaligenaceae|g__Bordetella	g__Bordetella	G	3.30427e-06	0.000274407	0	0	0	0	0.0248614	0.000729129
k__Bacteria|p__Spirochaetes|c__Spirochaetia|o__Spirochaetales|f__Brachyspiraceae|g__Brachyspira	g__Brachyspira	G	2.70978e-06	0.00015238	0	0	0	0	0.0136416	0.00741281
k__Bacteria|p__Actinobacteria|c__Actinobacteria|o__Actinomycetales|f__Brevibacteriaceae|g__Brevibacterium	g__Brevibacterium	G	2.80204e-07	1.2941e-05	0	0	0	0	0.0008585	0.000607607
k__Bacteria|p__Firmicutes|c__Erysipelotrichia|o__Erysipelotrichales|f__Erysipelotrichaceae|g__Bulleidia	g__Bulleidia	G	7.23053e-09	6.55909e-07	0	0	0	0	5.95e-05	0.000121521
k__Bacteria|p__Proteobacteria|c__Betaproteobacteria|o__Burkholderiales|f__Burkholderiaceae|g__Burkholderia	g__Burkholderia	G	2.32057e-07	1.43037e-05	0	0	0	0	0.0011953	0.000364564
k__Bacteria|p__Proteobacteria|c__Betaproteobacteria|o__Burkholderiales|f__Burkholderiales_noname|g__Burkholderiales_noname	g__Burkholderiales_noname	G	0.000591295	0.00212612	0	0	0	0.0001906	0.0750831	0.423988
k__Bacteria|p__Firmicutes|c__Clostridia|o__Clostridiales|f__Clostridiaceae|g__Butyricicoccus	g__Butyricicoccus	G	6.62495e-06	0.000386487	0	0	0	0	0.034508	0.00534694
k__Bacteria|p__Bacteroidetes|c__Bacteroidia|o__Bacteroidales|f__Porphyromonadaceae|g__Butyricimonas	g__Butyricimonas	G	8.14003e-06	0.000199461	0	0	0	0	0.0127137	0.00960019
k__Bacteria|p__Firmicutes|c__Clostridia|o__Clostridiales|f__Lachnospiraceae|g__Butyrivibrio	g__Butyrivibrio	G	0.00998253	0.0428784	0	0	0	0	0.7194	0.183497
k__Viruses|p__Viruses_noname|c__Viruses_noname|o__Caudovirales|f__Siphoviridae|g__C2likevirus	g__C2likevirus	G	0.00144087	0.0123154	0	0	0	0	0.473541	0.224936
k__Bacteria|p__Proteobacteria|c__Epsilonproteobacteria|o__Campylobacterales|f__Campylobacteraceae|g__Campylobacter	g__Campylobacter	G	4.83811e-06	0.000190401	0	0	0	0	0.014092	0.00558999
k__Eukaryota|p__Ascomycota|c__Saccharomycetes|o__Saccharomycetales|f__Saccharomycetales_noname|g__Candida	g__Candida	G	4.21667e-07	3.18901e-05	0	0	0	0	0.0028475	0.000364564
k__Bacteria|p__Proteobacteria|c__Alphaproteobacteria|o__Alphaproteobacteria_noname|f__Alphaproteobacteria_noname|g__Candidatus_Pelagibacter	g__Candidatus_Pelagibacter	G	1.93544e-06	5.13234e-05	0	0	0	0	0.0042217	0.00741281
k__Bacteria|p__Candidatus_Saccharibacteria|c__Candidatus_Saccharibacteria_noname|o__Candidatus_Saccharibacteria_noname|f__Candidatus_Saccharibacteria_noname|g__Candidatus_Saccharibacteria_noname	g__Candidatus_Saccharibacteria_noname	G	1.75428e-07	1.10525e-05	0	0	0	0	0.0009544	0.000486086
k__Bacteria|p__Candidatus_Saccharibacteria|c__Candidatus_Saccharibacteria_noname|o__Candidatus_Saccharibacteria_noname|f__Candidatus_Saccharibacteria_noname|g__Candidatus_Saccharibacteria_noname_unclassified	g__Candidatus_Saccharibacteria_noname_unclassified	G	1.73496e-07	4.21701e-06	0	0	0	0	0.0001486	0.00230891
k__Bacteria|p__Proteobacteria|c__Gammaproteobacteria|o__Cardiobacteriales|f__Cardiobacteriaceae|g__Cardiobacteriaceae_unclassified	g__Cardiobacteriaceae_unclassified	G	1.65998e-08	1.00085e-06	0	0	0	0	6.89e-05	0.000364564
k__Viruses|p__Viruses_noname|c__Viruses_noname|o__Tymovirales|f__Betaflexiviridae|g__Carlavirus	g__Carlavirus	G	0	0	0	0	0	0	0	0
k__Bacteria|p__Firmicutes|c__Erysipelotrichia|o__Erysipelotrichales|f__Erysipelotrichaceae|g__Catenibacterium	g__Catenibacterium	G	0.000101078	0.000810773	0	0	0	0	0.0331785	0.0945437
k__Viruses|p__Viruses_noname|c__Viruses_noname|o__Viruses_noname|f__Caulimoviridae|g__Cavemovirus	g__Cavemovirus	G	5.82817e-08	5.28696e-06	0	0	0	0	0.0004796	0.000121521
k__Bacteria|p__Fusobacteria|c__Fusobacteriia|o__Fusobacteriales|f__Fusobacteriaceae|g__Cetobacterium	g__Cetobacterium	G	6.82464e-08	6.1909e-06	0	0	0	0	0.0005616	0.000121521
k__Bacteria|p__Proteobacteria|c__Gammaproteobacteria|o__Enterobacteriales|f__Enterobacteriaceae|g__Citrobacter	g__Citrobacter	G	0.000305023	0.00944273	0	0	0	0	0.631839	0.022603
k__Bacteria|p__Firmicutes|c__Clostridia|o__Clostridiales|f__Clostridiaceae|g__Clostridiaceae_noname	g__Clostridiaceae_noname	G	9.90509e-06	0.000160137	0	0	0	0	0.0104875	0.028436
k__Bacteria|p__Firmicutes|c__Clostridia|o__Clostridiales|f__Clostridiales_Family_XIII_Incertae_Sedis|g__Clostridiales_Family_XIII_Incertae_Sedis_unclassified	g__Clostridiales_Family_XIII_Incertae_Sedis_unclassified	G	9.03755e-08	3.62155e-06	0	0	0	0	0.0002709	0.000972172
k__Bacteria|p__Firmicutes|c__Clostridia|o__Clostridiales|f__Clostridiales_noname|g__Clostridiales_noname	g__Clostridiales_noname	G	0.000320084	0.00330764	0	0	0	0	0.1778	0.0684166
k__Bacteria|p__Firmicutes|c__Clostridia|o__Clostridiales|f__Clostridiaceae|g__Clostridium	g__Clostridium	G	0.00119724	0.00509213	0	0	0	0.0003155	0.124782	0.487666
k__Bacteria|p__Actinobacteria|c__Actinobacteria|o__Coriobacteriales|f__Coriobacteriaceae|g__Collinsella	g__Collinsella	G	0.00735638	0.00962122	0	0.0019695	0.0046735	0.009323	0.19413	0.932313
k__Bacteria|p__Proteobacteria|c__Betaproteobacteria|o__Burkholderiales|f__Comamonadaceae|g__Comamonas	g__Comamonas	G	5.43954e-07	1.62926e-05	0	0	0	0	0.0008488	0.00145826
k__Bacteria|p__Firmicutes|c__Erysipelotrichia|o__Erysipelotrichales|f__Erysipelotrichaceae|g__Coprobacillus	g__Coprobacillus	G	6.48869e-06	0.000101757	0	0	0	0	0.0049587	0.017256
k__Bacteria|p__Bacteroidetes|c__Bacteroidia|o__Bacteroidales|f__Porphyromonadaceae|g__Coprobacter	g__Coprobacter	G	0.000424411	0.00128379	0	0	0	0.0003588	0.0459036	0.484141
k__Bacteria|p__Firmicutes|c__Clostridia|o__Clostridiales|f__Lachnospiraceae|g__Coprococcus	g__Coprococcus	G	0.00276381	0.00747445	0	7.37e-05	0.0004535	0.0017396	0.220663	0.825981
k__Bacteria|p__Actinobacteria|c__Actinobacteria|o__Coriobacteriales|f__Coriobacteriaceae|g__Coriobacteriaceae_noname	g__Coriobacteriaceae_noname	G	6.42245e-05	0.00082316	0	0	0	0	0.0479476	0.0478795
k__Bacteria|p__Actinobacteria|c__Actinobacteria|o__Actinomycetales|f__Corynebacteriaceae|g__Corynebacterium	g__Corynebacterium	G	6.67068e-07	2.53596e-05	0	0	0	0	0.0017547	0.00157978
k__Bacteria|p__Proteobacteria|c__Gammaproteobacteria|o__Enterobacteriales|f__Enterobacteriaceae|g__Cronobacter	g__Cronobacter	G	1.59903e-05	0.000673543	0	0	0	0	0.0526376	0.00255195
k__Bacteria|p__Actinobacteria|c__Actinobacteria|o__Coriobacteriales|f__Coriobacteriaceae|g__Cryptobacterium	g__Cryptobacterium	G	2.0322e-07	1.27362e-05	0	0	0	0	0.0010755	0.00085065
k__Eukaryota|p__Apicomplexa|c__Coccidia|o__Eucoccidiorida|f__Cryptosporidiidae|g__Cryptosporidium	g__Cryptosporidium	G	1.57249e-08	1.31781e-06	0	0	0	0	0.0001191	0.000243043
k__Eukaryota|p__Ascomycota|c__Saccharomycetes|o__Saccharomycetales|f__Debaryomycetaceae|g__Debaryomycetaceae_unclassified	g__Debaryomycetaceae_unclassified	G	1.86706e-07	1.21913e-05	0	0	0	0	0.0009147	0.000243043
k__Bacteria|p__Deinococcus_Thermus|c__Deinococci|o__Deinococcales|f__Deinococcaceae|g__Deinococcus	g__Deinococcus	G	2.67469e-08	2.42631e-06	0	0	0	0	0.0002201	0.000121521
k__Bacteria|p__Proteobacteria|c__Betaproteobacteria|o__Burkholderiales|f__Comamonadaceae|g__Delftia	g__Delftia	G	1.05942e-07	7.75387e-06	0	0	0	0	0.0006916	0.000364564
k__Viruses|p__Viruses_noname|c__Viruses_noname|o__Viruses_noname|f__Parvoviridae|g__Dependovirus	g__Dependovirus	G	1.0254e-07	6.60779e-06	0	0	0	0	0.0004628	0.000243043
k__Bacteria|p__Actinobacteria|c__Actinobacteria|o__Actinomycetales|f__Dermabacteraceae|g__Dermabacteraceae_unclassified	g__Dermabacteraceae_unclassified	G	6.8611e-08	6.22397e-06	0	0	0	0	0.0005646	0.000121521
k__Bacteria|p__Actinobacteria|c__Actinobacteria|o__Actinomycetales|f__Dermatophilaceae|g__Dermatophilaceae_unclassified	g__Dermatophilaceae_unclassified	G	1.27408e-06	3.18591e-05	0	0	0	0	0.001428	0.00230891
k__Bacteria|p__Proteobacteria|c__Deltaproteobacteria|o__Desulfovibrionales|f__Desulfovibrionaceae|g__Desulfovibrio	g__Desulfovibrio	G	0.00419158	0.0085611	0	0	0	0.0054697	0.131274	0.405153
k__Bacteria|p__Firmicutes|c__Negativicutes|o__Selenomonadales|f__Veillonellaceae|g__Dialister	g__Dialister	G	0.0058814	0.0161378	0	0	0	0.0059342	0.547486	0.433589
k__Bacteria|p__Firmicutes|c__Clostridia|o__Clostridiales|f__Lachnospiraceae|g__Dorea	g__Dorea	G	0.00100407	0.00201194	0	0.0001493	0.0004376	0.0010681	0.0442064	0.891603
k__Bacteria|p__Bacteroidetes|c__Bacteroidia|o__Bacteroidales|f__Porphyromonadaceae|g__Dysgonomonas	g__Dysgonomonas	G	1.22992e-06	5.01629e-05	0	0	0	0	0.0029306	0.000972172
k__Bacteria|p__Actinobacteria|c__Actinobacteria|o__Coriobacteriales|f__Coriobacteriaceae|g__Eggerthella	g__Eggerthella	G	0.000184824	0.000943807	0	0	0	1.21e-05	0.0378967	0.261271
k__Bacteria|p__Proteobacteria|c__Betaproteobacteria|o__Neisseriales|f__Neisseriaceae|g__Eikenella	g__Eikenella	G	8.67104e-07	6.5573e-05	0	0	0	0	0.0058747	0.000729129
k__Viruses|p__Viruses_noname|c__Viruses_noname|o__Viruses_noname|f__Endornaviridae|g__Endornavirus	g__Endornavirus	G	3.15655e-05	0.000634002	0	0	0	0	0.0231089	0.00595455
k__Bacteria|p__Proteobacteria|c__Gammaproteobacteria|o__Pseudomonadales|f__Moraxellaceae|g__Enhydrobacter	g__Enhydrobacter	G	1.09855e-08	7.66178e-07	0	0	0	0	6.45e-05	0.000243043
k__Eukaryota|p__Eukaryota_noname|c__Eukaryota_noname|o__Eukaryota_noname|f__Eukaryota_noname|g__Entamoeba	g__Entamoeba	G	2.80836e-08	1.67559e-06	0	0	0	0	0.0001102	0.000364564
k__Bacteria|p__Proteobacteria|c__Gammaproteobacteria|o__Enterobacteriales|f__Enterobacteriaceae|g__Enterobacter	g__Enterobacter	G	0.000340867	0.00751413	0	0	0	0	0.390301	0.0353627
k__Bacteria|p__Proteobacteria|c__Gammaproteobacteria|o__Enterobacteriales|f__Enterobacteriaceae|g__Enterobacteriaceae_noname	g__Enterobacteriaceae_noname	G	2.04501e-06	9.72776e-05	0	0	0	0	0.0073039	0.00303804
k__Bacteria|p__Firmicutes|c__Bacilli|o__Lactobacillales|f__Enterococcaceae|g__Enterococcus	g__Enterococcus	G	2.70301e-06	6.34583e-05	0	0	0	0	0.0030688	0.00789889
k__Bacteria|p__Actinobacteria|c__Actinobacteria|o__Coriobacteriales|f__Coriobacteriaceae|g__Enterorhabdus	g__Enterorhabdus	G	3.84421e-06	0.000156634	0	0	0	0	0.0132006	0.00522542
k__Viruses|p__Viruses_noname|c__Viruses_noname|o__Caudovirales|f__Podoviridae|g__Epsilon15likevirus	g__Epsilon15likevirus	G	6.145e-06	9.37198e-05	0	0	0	0	0.0063276	0.0181067
k__Eukaryota|p__Ascomycota|c__Saccharomycetes|o__Saccharomycetales|f__Saccharomycetaceae|g__Eremothecium	g__Eremothecium	G	0	0	0	0	0	0	0	0
k__Bacteria|p__Firmicutes|c__Erysipelotrichia|o__Erysipelotrichales|f__Erysipelotrichaceae|g__Erysipelotrichaceae_noname	g__Erysipelotrichaceae_noname	G	0.000336048	0.00174005	0	0	0	0.0001127	0.0706521	0.371734
k__Bacteria|p__Proteobacteria|c__Alphaproteobacteria|o__Sphingomonadales|f__Erythrobacteraceae|g__Erythrobacteraceae_unclassified	g__Erythrobacteraceae_unclassified	G	2.63702e-09	1.69443e-07	0	0	0	0	1.15e-05	0.000243043
k__Bacteria|p__Proteobacteria|c__Gammaproteobacteria|o__Enterobacteriales|f__Enterobacteriaceae|g__Escherichia	g__Escherichia	G	0.0107353	0.053947	0	0	0.0003716	0.0018798	0.833565	0.723903
k__Bacteria|p__Firmicutes|c__Clostridia|o__Clostridiales|f__Eubacteriaceae|g__Eubacterium	g__Eubacterium	G	0.0325451	0.0464573	0	0.0067623	0.0166786	0.0395987	0.620434	0.992952
k__Bacteria|p__Firmicutes|c__Bacilli|o__Bacillales|f__Bacillales_noname|g__Exiguobacterium	g__Exiguobacterium	G	6.52692e-08	5.92082e-06	0	0	0	0	0.0005371	0.000121521
k__Bacteria|p__Firmicutes|c__Clostridia|o__Clostridiales|f__Ruminococcaceae|g__Faecalibacterium	g__Faecalibacterium	G	0.0854067	0.0718329	0	0.0348113	0.0663509	0.114541	0.682581	0.998663
k__Eukaryota|p__Basidiomycota|c__Tremellomycetes|o__Tremellales|f__Tremellaceae|g__Filobasidiella	g__Filobasidiella	G	2.81565e-08	2.55419e-06	0	0	0	0	0.0002317	0.000121521
k__Viruses|p__Viruses_noname|c__Viruses_noname|o__Viruses_noname|f__Flaviviridae|g__Flavivirus	g__Flavivirus	G	3.75258e-08	2.00825e-06	0	0	0	0	0.0001296	0.000364564
k__Bacteria|p__Firmicutes|c__Clostridia|o__Clostridiales|f__Clostridiales_noname|g__Flavonifractor	g__Flavonifractor	G	0.000161317	0.000977487	0	0	0	6.25e-05	0.0542157	0.335764
k__Bacteria|p__Synergistetes|c__Synergistia|o__Synergistales|f__Synergistaceae|g__Fretibacterium	g__Fretibacterium	G	1.59558e-08	1.44741e-06	0	0	0	0	0.0001313	0.000121521
k__Eukaryota|p__Ascomycota|c__Sordariomycetes|o__Hypocreales|f__Nectriaceae|g__Fusarium	g__Fusarium	G	2.57941e-07	1.0879e-05	0	0	0	0	0.0008138	0.00218739
k__Bacteria|p__Fusobacteria|c__Fusobacteriia|o__Fusobacteriales|f__Fusobacteriaceae|g__Fusobacterium	g__Fusobacterium	G	2.19065e-05	0.000797443	0	0	0	0	0.040867	0.00486086
k__Viruses|p__Viruses_noname|c__Viruses_noname|o__Viruses_noname|f__Retroviridae|g__Gammaretrovirus	g__Gammaretrovirus	G	0.000227862	0.00392077	0	0	0	0	0.291579	0.0715761
k__Bacteria|p__Actinobacteria|c__Actinobacteria|o__Bifidobacteriales|f__Bifidobacteriaceae|g__Gardnerella	g__Gardnerella	G	9.1084e-07	3.32653e-05	0	0	0	0	0.0023263	0.00303804
k__Bacteria|p__Firmicutes|c__Bacilli|o__Bacillales|f__Bacillales_noname|g__Gemella	g__Gemella	G	1.1824e-08	7.7877e-07	0	0	0	0	6e-05	0.000243043
k__Eukaryota|p__Eukaryota_noname|c__Eukaryota_noname|o__Eukaryota_noname|f__Hexamitidae|g__Giardia	g__Giardia	G	1.64734e-07	8.12986e-06	0	0	0	0	0.0006127	0.00085065
k__Bacteria|p__Proteobacteria|c__Alphaproteobacteria|o__Rhodospirillales|f__Acetobacteraceae|g__Gluconacetobacter	g__Gluconacetobacter	G	1.49253e-07	4.57739e-06	0	0	0	0	0.0002175	0.00121521
k__Bacteria|p__Actinobacteria|c__Actinobacteria|o__Coriobacteriales|f__Coriobacteriaceae|g__Gordonibacter	g__Gordonibacter	G	4.32005e-05	0.000216116	0	0	0	0	0.0066429	0.151051
k__Bacteria|p__Firmicutes|c__Bacilli|o__Lactobacillales|f__Carnobacteriaceae|g__Granulicatella	g__Granulicatella	G	5.56544e-07	1.16783e-05	0	0	0	0	0.0006146	0.00449629
k__Viruses|p__Viruses_noname|c__Viruses_noname|o__Viruses_noname|f__Circoviridae|g__Gyrovirus	g__Gyrovirus	G	3.1241e-06	6.03544e-05	0	0	0	0	0.0036586	0.00461782
k__Bacteria|p__Proteobacteria|c__Gammaproteobacteria|o__Pasteurellales|f__Pasteurellaceae|g__Haemophilus	g__Haemophilus	G	0.000628871	0.00485079	0	0	0	0.0001422	0.320107	0.321667
k__Bacteria|p__Proteobacteria|c__Gammaproteobacteria|o__Enterobacteriales|f__Enterobacteriaceae|g__Hafnia	g__Hafnia	G	3.47589e-06	0.000290006	0	0	0	0	0.0262906	0.00157978
k__Archaea|p__Euryarchaeota|c__Halobacteria|o__Halobacteriales|f__Halobacteriaceae|g__Halobacterium	g__Halobacterium	G	8.05687e-09	7.3087e-07	0	0	0	0	6.63e-05	0.000121521
k__Archaea|p__Euryarchaeota|c__Halobacteria|o__Halobacteriales|f__Halobacteriaceae|g__Halococcus	g__Halococcus	G	4.56921e-09	4.1449e-07	0	0	0	0	3.76e-05	0.000121521
k__Bacteria|p__Proteobacteria|c__Gammaproteobacteria|o__Oceanospirillales|f__Halomonadaceae|g__Halomonas	g__Halomonas	G	4.88662e-07	1.68013e-05	0	0	0	0	0.0008036	0.000972172
k__Archaea|p__Euryarchaeota|c__Halobacteria|o__Halobacteriales|f__Halobacteriaceae|g__Halonotius	g__Halonotius	G	2.38182e-08	2.16064e-06	0	0	0	0	0.000196	0.000121521
k__Archaea|p__Euryarchaeota|c__Halobacteria|o__Halobacteriales|f__Halobacteriaceae|g__Haloquadratum	g__Haloquadratum	G	9.61696e-07	4.25362e-05	0	0	0	0	0.0034181	0.00133674
k__Archaea|p__Euryarchaeota|c__Halobacteria|o__Halobacteriales|f__Halobacteriaceae|g__Halorubrum	g__Halorubrum	G	9.70349e-08	7.04232e-06	0	0	0	0	0.0006106	0.000243043
k__Bacteria|p__Proteobacteria|c__Epsilonproteobacteria|o__Campylobacterales|f__Helicobacteraceae|g__Helicobacter	g__Helicobacter	G	4.59233e-06	0.000289893	0	0	0	0	0.0258161	0.00255195
k__Bacteria|p__Firmicutes|c__Erysipelotrichia|o__Erysipelotrichales|f__Erysipelotrichaceae|g__Holdemania	g__Holdemania	G	0.000116176	0.000274454	0	0	0	0.0001251	0.0052086	0.458622
k__Bacteria|p__Proteobacteria|c__Alphaproteobacteria|o__Rhizobiales|f__Hyphomicrobiaceae|g__Hyphomicrobiaceae_unclassified	g__Hyphomicrobiaceae_unclassified	G	1.38522e-07	6.51498e-06	0	0	0	0	0.0003765	0.000486086
k__Viruses|p__Viruses_noname|c__Viruses_noname|o__Picornavirales|f__Iflaviridae|g__Iflaviridae_noname	g__Iflaviridae_noname	G	9.49326e-08	4.77668e-06	0	0	0	0	0.0003737	0.000607607
k__Viruses|p__Viruses_noname|c__Viruses_noname|o__Viruses_noname|f__Orthomyxoviridae|g__Influenzavirus_A	g__Influenzavirus_A	G	4.21031e-06	0.00036119	0	0	0	0	0.0327455	0.000607607
k__Bacteria|p__Synergistetes|c__Synergistia|o__Synergistales|f__Synergistaceae|g__Jonquetella	g__Jonquetella	G	1.30307e-07	5.27898e-06	0	0	0	0	0.0003656	0.000972172
k__Viruses|p__Viruses_noname|c__Viruses_noname|o__Viruses_noname|f__Anelloviridae|g__Kappatorquevirus	g__Kappatorquevirus	G	1.3117e-07	1.1899e-05	0	0	0	0	0.0010794	0.000121521
k__Bacteria|p__Proteobacteria|c__Gammaproteobacteria|o__Enterobacteriales|f__Enterobacteriaceae|g__Klebsiella	g__Klebsiella	G	0.00203177	0.0227223	0	0	0	0	0.700041	0.0895613
k__Bacteria|p__Actinobacteria|c__Actinobacteria|o__Actinomycetales|f__Micrococcaceae|g__Kocuria	g__Kocuria	G	5.41986e-08	4.91656e-06	0	0	0	0	0.000446	0.000121521
k__Bacteria|p__Firmicutes|c__Clostridia|o__Clostridiales|f__Lachnospiraceae|g__Lachnospiraceae_noname	g__Lachnospiraceae_noname	G	0.00197842	0.00441672	0	0.000285	0.0007829	0.0019778	0.138736	0.967918
k__Bacteria|p__Firmicutes|c__Bacilli|o__Lactobacillales|f__Lactobacillaceae|g__Lactobacillus	g__Lactobacillus	G	0.000515126	0.0034655	0	0	0	0	0.165404	0.219225
k__Bacteria|p__Firmicutes|c__Bacilli|o__Lactobacillales|f__Streptococcaceae|g__Lactococcus	g__Lactococcus	G	3.84367e-05	0.000614084	0	0	0	0	0.0290391	0.0456921
k__Viruses|p__Viruses_noname|c__Viruses_noname|o__Caudovirales|f__Siphoviridae|g__Lambdalikevirus	g__Lambdalikevirus	G	3.8923e-06	0.000162952	0	0	0	0	0.0081378	0.000607607
k__Bacteria|p__Proteobacteria|c__Betaproteobacteria|o__Burkholderiales|f__Burkholderiaceae|g__Lautropia	g__Lautropia	G	1.13361e-06	3.90754e-05	0	0	0	0	0.003265	0.00522542
k__Eukaryota|p__Eukaryota_noname|c__Eukaryota_noname|o__Kinetoplastida|f__Trypanosomatidae|g__Leishmania	g__Leishmania	G	1.41147e-06	0.000126642	0	0	0	0	0.0114875	0.000243043
k__Bacteria|p__Fusobacteria|c__Fusobacteriia|o__Fusobacteriales|f__Leptotrichiaceae|g__Leptotrichiaceae_unclassified	g__Leptotrichiaceae_unclassified	G	9.53943e-09	8.65359e-07	0	0	0	0	7.85e-05	0.000121521
k__Bacteria|p__Firmicutes|c__Bacilli|o__Lactobacillales|f__Leuconostocaceae|g__Leuconostoc	g__Leuconostoc	G	1.64715e-06	5.49106e-05	0	0	0	0	0.0031782	0.00388869
k__Bacteria|p__Proteobacteria|c__Betaproteobacteria|o__Burkholderiales|f__Comamonadaceae|g__Limnohabitans	g__Limnohabitans	G	2.44987e-08	1.84732e-06	0	0	0	0	0.0001631	0.000243043
k__Bacteria|p__Firmicutes|c__Bacilli|o__Bacillales|f__Bacillaceae|g__Lysinibacillus	g__Lysinibacillus	G	1.33066e-08	1.20709e-06	0	0	0	0	0.0001095	0.000121521
k__Bacteria|p__Firmicutes|c__Clostridia|o__Clostridiales|f__Lachnospiraceae|g__Marvinbryantia	g__Marvinbryantia	G	1.58415e-07	7.86061e-06	0	0	0	0	0.0006416	0.000972172
k__Viruses|p__Viruses_noname|c__Viruses_noname|o__Viruses_noname|f__Adenoviridae|g__Mastadenovirus	g__Mastadenovirus	G	3.06945e-06	0.000159244	0	0	0	0	0.0101544	0.00194434
k__Viruses|p__Viruses_noname|c__Viruses_noname|o__Viruses_noname|f__Geminiviridae|g__Mastrevirus	g__Mastrevirus	G	2.64359e-06	7.14371e-05	0	0	0	0	0.0050928	0.00303804
k__Bacteria|p__Firmicutes|c__Negativicutes|o__Selenomonadales|f__Veillonellaceae|g__Megamonas	g__Megamonas	G	0.000185056	0.00151775	0	0	0	0	0.041368	0.0499453
k__Bacteria|p__Firmicutes|c__Negativicutes|o__Selenomonadales|f__Veillonellaceae|g__Megasphaera	g__Megasphaera	G	0.000641333	0.00577374	0	0	0	0	0.249566	0.0605177
k__Archaea|p__Euryarchaeota|c__Methanobacteria|o__Methanobacteriales|f__Methanobacteriaceae|g__Methanobrevibacter	g__Methanobrevibacter	G	5.21032e-05	0.00110167	0	0	0	0	0.0888851	0.093693
k__Archaea|p__Euryarchaeota|c__Methanomicrobia|o__Methanomicrobiales|f__Methanomicrobiaceae|g__Methanoculleus	g__Methanoculleus	G	3.71187e-07	3.36718e-05	0	0	0	0	0.0030545	0.000121521
k__Archaea|p__Euryarchaeota|c__Methanomicrobia|o__Methanomicrobiales|f__Methanomicrobiaceae|g__Methanofollis	g__Methanofollis	G	8.38498e-10	7.60634e-08	0	0	0	0	6.9e-06	0.000121521
k__Archaea|p__Euryarchaeota|c__Methanomicrobia|o__Methanomicrobia_noname|f__Methanomicrobia_noname|g__Methanomassiliicoccus	g__Methanomassiliicoccus	G	1.01198e-06	5.05516e-05	0	0	0	0	0.0039706	0.00121521
k__Archaea|p__Euryarchaeota|c__Methanobacteria|o__Methanobacteriales|f__Methanobacteriaceae|g__Methanosphaera	g__Methanosphaera	G	3.99198e-08	3.62128e-06	0	0	0	0	0.0003285	0.000121521
k__Bacteria|p__Proteobacteria|c__Alphaproteobacteria|o__Rhizobiales|f__Methylobacteriaceae|g__Methylobacterium	g__Methylobacterium	G	1.17103e-06	3.14031e-05	0	0	0	0	0.0020906	0.00279499
k__Viruses|p__Viruses_noname|c__Viruses_noname|o__Viruses_noname|f__Microviridae|g__Microvirus	g__Microvirus	G	4.26467e-07	3.86865e-05	0	0	0	0	0.0035094	0.000121521
k__Bacteria|p__Firmicutes|c__Negativicutes|o__Selenomonadales|f__Veillonellaceae|g__Mitsuokella	g__Mitsuokella	G	0.000898715	0.00620621	0	0	0	0	0.281497	0.119577
k__Bacteria|p__Actinobacteria|c__Actinobacteria|o__Actinomycetales|f__Actinomycetaceae|g__Mobiluncus	g__Mobiluncus	G	1.08033e-08	9.80005e-07	0	0	0	0	8.89e-05	0.000121521
k__Bacteria|p__Proteobacteria|c__Gammaproteobacteria|o__Enterobacteriales|f__Enterobacteriaceae|g__Morganella	g__Morganella	G	1.08096e-06	4.4819e-05	0	0	0	0	0.0029243	0.00145826
k__Bacteria|p__Deferribacteres|c__Deferribacteres|o__Deferribacterales|f__Deferribacteraceae|g__Mucispirillum	g__Mucispirillum	G	9.77032e-09	8.86304e-07	0	0	0	0	8.04e-05	0.000121521
k__Viruses|p__Viruses_noname|c__Viruses_noname|o__Caudovirales|f__Myoviridae|g__Mulikevirus	g__Mulikevirus	G	7.88227e-06	0.000600108	0	0	0	0	0.0543513	0.00413173
k__Bacteria|p__Tenericutes|c__Mollicutes|o__Mycoplasmatales|f__Mycoplasmataceae|g__Mycoplasma	g__Mycoplasma	G	1.30128e-05	0.000191781	0	0	0	0	0.0062634	0.0119091
k__Viruses|p__Viruses_noname|c__Viruses_noname|o__Caudovirales|f__Myoviridae|g__Myoviridae_noname	g__Myoviridae_noname	G	1.2265e-05	0.000755256	0	0	0	0	0.0641026	0.000607607
k__Eukaryota|p__Ascomycota|c__Saccharomycetes|o__Saccharomycetales|f__Saccharomycetaceae|g__Nakaseomyces	g__Nakaseomyces	G	1.21021e-06	3.07067e-05	0	0	0	0	0.0019105	0.00473934
k__Eukaryota|p__Ascomycota|c__Saccharomycetes|o__Saccharomycetales|f__Saccharomycetaceae|g__Naumovozyma	g__Naumovozyma	G	8.21363e-08	3.42496e-06	0	0	0	0	0.0001843	0.000729129
k__Bacteria|p__Proteobacteria|c__Betaproteobacteria|o__Neisseriales|f__Neisseriaceae|g__Neisseria	g__Neisseria	G	8.73776e-07	1.61541e-05	0	0	0	0	0.0006094	0.00437477
k__Bacteria|p__Bacteroidetes|c__Bacteroidia|o__Bacteroidales|f__Porphyromonadaceae|g__Odoribacter	g__Odoribacter	G	0.00796848	0.0102181	0	0.0023568	0.0059617	0.010616	0.228434	0.880666
k__Bacteria|p__Actinobacteria|c__Actinobacteria|o__Coriobacteriales|f__Coriobacteriaceae|g__Olsenella	g__Olsenella	G	5.81067e-06	0.000133029	0	0	0	0	0.0112023	0.0347551
k__Viruses|p__Viruses_noname|c__Viruses_noname|o__Viruses_noname|f__Hepadnaviridae|g__Orthohepadnavirus	g__Orthohepadnavirus	G	8.34104e-06	0.000132359	0	0	0	0	0.005394	0.00802042
k__Viruses|p__Viruses_noname|c__Viruses_noname|o__Viruses_noname|f__Reoviridae|g__Oryzavirus	g__Oryzavirus	G	2.36977e-06	0.000137306	0	0	0	0	0.0120135	0.00085065
k__Bacteria|p__Firmicutes|c__Clostridia|o__Clostridiales|f__Oscillospiraceae|g__Oscillibacter	g__Oscillibacter	G	0.0155735	0.0205382	0	0.0044502	0.0096354	0.0198103	0.762409	0.997083
k__Bacteria|p__Proteobacteria|c__Betaproteobacteria|o__Burkholderiales|f__Oxalobacteraceae|g__Oxalobacter	g__Oxalobacter	G	0.000291266	0.00126327	0	0	0	0.0001402	0.0374903	0.361283
k__Viruses|p__Viruses_noname|c__Viruses_noname|o__Caudovirales|f__Podoviridae|g__P22likevirus	g__P22likevirus	G	3.37657e-06	0.000254564	0	0	0	0	0.0229915	0.00255195
k__Viruses|p__Viruses_noname|c__Viruses_noname|o__Caudovirales|f__Myoviridae|g__P2likeviruses	g__P2likeviruses	G	1.23626e-05	0.000794653	0	0	0	0	0.0709653	0.00145826
k__Bacteria|p__Proteobacteria|c__Gammaproteobacteria|o__Enterobacteriales|f__Enterobacteriaceae|g__Pantoea	g__Pantoea	G	1.49401e-06	0.000103645	0	0	0	0	0.0087763	0.000364564
k__Bacteria|p__Bacteroidetes|c__Bacteroidia|o__Bacteroidales|f__Porphyromonadaceae|g__Parabacteroides	g__Parabacteroides	G	0.0239929	0.02762	0	0.0085502	0.0168263	0.0304857	0.62592	0.964151
k__Bacteria|p__Proteobacteria|c__Alphaproteobacteria|o__Rhodobacterales|f__Rhodobacteraceae|g__Paracoccus	g__Paracoccus	G	6.33127e-09	5.74334e-07	0	0	0	0	5.21e-05	0.000121521
k__Bacteria|p__Bacteroidetes|c__Bacteroidia|o__Bacteroidales|f__Prevotellaceae|g__Paraprevotella	g__Paraprevotella	G	0.0112345	0.0206094	0	0	2.33e-05	0.0163028	0.448982	0.509904
k__Bacteria|p__Actinobacteria|c__Actinobacteria|o__Bifidobacteriales|f__Bifidobacteriaceae|g__Parascardovia	g__Parascardovia	G	8.30502e-07	4.45822e-05	0	0	0	0	0.0038067	0.00182282
k__Bacteria|p__Proteobacteria|c__Betaproteobacteria|o__Burkholderiales|f__Sutterellaceae|g__Parasutterella	g__Parasutterella	G	0.000538382	0.0016738	0	0	1.54e-05	0.0002683	0.0321051	0.525823
k__Bacteria|p__Proteobacteria|c__Alphaproteobacteria|o__Rhizobiales|f__Rhodobiaceae|g__Parvibaculum	g__Parvibaculum	G	3.90084e-09	3.5386e-07	0	0	0	0	3.21e-05	0.000121521
k__Bacteria|p__Firmicutes|c__Clostridia|o__Clostridiales|f__Clostridiales_Family_XI_Incertae_Sedis|g__Parvimonas	g__Parvimonas	G	8.92332e-08	3.64694e-06	0	0	0	0	0.0002179	0.00085065
k__Viruses|p__Viruses_noname|c__Viruses_noname|o__Viruses_noname|f__Parvoviridae|g__Parvoviridae_noname	g__Parvoviridae_noname	G	9.11182e-06	0.000323037	0	0	0	0	0.0166586	0.000972172
k__Viruses|p__Viruses_noname|c__Viruses_noname|o__Viruses_noname|f__Parvoviridae|g__Parvovirus	g__Parvovirus	G	1.6132e-07	9.45033e-06	0	0	0	0	0.0007205	0.000364564
k__Bacteria|p__Proteobacteria|c__Gammaproteobacteria|o__Pasteurellales|f__Pasteurellaceae|g__Pasteurella	g__Pasteurella	G	1.15496e-05	0.000937317	0	0	0	0	0.0849894	0.00558999
k__Bacteria|p__Proteobacteria|c__Gammaproteobacteria|o__Enterobacteriales|f__Enterobacteriaceae|g__Pectobacterium	g__Pectobacterium	G	1.3896e-07	7.8366e-06	0	0	0	0	0.000541	0.000364564
k__Bacteria|p__Firmicutes|c__Bacilli|o__Lactobacillales|f__Lactobacillaceae|g__Pediococcus	g__Pediococcus	G	1.83546e-07	1.25278e-05	0	0	0	0	0.00112	0.000729129
k__Eukaryota|p__Ascomycota|c__Eurotiomycetes|o__Eurotiales|f__Aspergillaceae|g__Penicillium	g__Penicillium	G	4.30186e-09	3.90238e-07	0	0	0	0	3.54e-05	0.000121521
k__Bacteria|p__Firmicutes|c__Clostridia|o__Clostridiales|f__Peptostreptococcaceae|g__Peptostreptococcaceae_noname	g__Peptostreptococcaceae_noname	G	8.30339e-05	0.00060178	0	0	0	0	0.0387581	0.127111
k__Bacteria|p__Firmicutes|c__Clostridia|o__Clostridiales|f__Peptostreptococcaceae|g__Peptostreptococcus	g__Peptostreptococcus	G	2.78649e-08	2.52773e-06	0	0	0	0	0.0002293	0.000121521
k__Viruses|p__Viruses_noname|c__Viruses_noname|o__Viruses_noname|f__Flaviviridae|g__Pestivirus	g__Pestivirus	G	1.57492e-08	1.42867e-06	0	0	0	0	0.0001296	0.000121521
k__Bacteria|p__Firmicutes|c__Negativicutes|o__Selenomonadales|f__Acidaminococcaceae|g__Phascolarctobacterium	g__Phascolarctobacterium	G	0.00837929	0.019922	0	0	0	0.0053225	0.309916	0.284846
k__Viruses|p__Viruses_noname|c__Viruses_noname|o__Caudovirales|f__Podoviridae|g__Phikmvlikevirus	g__Phikmvlikevirus	G	4.77956e-07	4.33572e-05	0	0	0	0	0.0039331	0.000121521
k__Eukaryota|p__Apicomplexa|c__Aconoidasida|o__Haemosporida|f__Haemosporida_noname|g__Plasmodium	g__Plasmodium	G	1.0802e-07	5.26383e-06	0	0	0	0	0.0003556	0.000729129
k__Bacteria|p__Proteobacteria|c__Gammaproteobacteria|o__Enterobacteriales|f__Enterobacteriaceae|g__Plesiomonas	g__Plesiomonas	G	7.3851e-07	4.85713e-05	0	0	0	0	0.0042055	0.000486086
k__Viruses|p__Viruses_noname|c__Viruses_noname|o__Caudovirales|f__Podoviridae|g__Podoviridae_noname	g__Podoviridae_noname	G	9.41572e-07	5.34837e-05	0	0	0	0	0.0038561	0.000364564
k__Viruses|p__Viruses_noname|c__Viruses_noname|o__Viruses_noname|f__Luteoviridae|g__Polerovirus	g__Polerovirus	G	7.98609e-06	0.000531404	0	0	0	0	0.0419318	0.000243043
k__Viruses|p__Viruses_noname|c__Viruses_noname|o__Viruses_noname|f__Polyomaviridae|g__Polyomavirus	g__Polyomavirus	G	2.81388e-06	0.000161974	0	0	0	0	0.0140018	0.000729129
k__Bacteria|p__Bacteroidetes|c__Bacteroidia|o__Bacteroidales|f__Porphyromonadaceae|g__Porphyromonas	g__Porphyromonas	G	1.07091e-05	0.000204367	0	0	0	0	0.0121036	0.0222384
k__Viruses|p__Viruses_noname|c__Viruses_noname|o__Viruses_noname|f__Potyviridae|g__Potyvirus	g__Potyvirus	G	1.50376e-06	6.76073e-05	0	0	0	0	0.0057698	0.00182282
k__Bacteria|p__Bacteroidetes|c__Bacteroidia|o__Bacteroidales|f__Prevotellaceae|g__Prevotella	g__Prevotella	G	0.0758388	0.16357	0	1.47e-05	0.0002763	0.0464908	0.947085	0.766679
k__Bacteria|p__Actinobacteria|c__Actinobacteria|o__Actinomycetales|f__Propionibacteriaceae|g__Propionibacteriaceae_unclassified	g__Propionibacteriaceae_unclassified	G	1.62449e-05	0.000113754	0	0	0	0	0.0048555	0.0416819
k__Bacteria|p__Actinobacteria|c__Actinobacteria|o__Actinomycetales|f__Propionibacteriaceae|g__Propionibacterium	g__Propionibacterium	G	5.78395e-06	9.33163e-05	0	0	0	0	0.0034996	0.0153117
k__Bacteria|p__Proteobacteria|c__Gammaproteobacteria|o__Enterobacteriales|f__Enterobacteriaceae|g__Proteus	g__Proteus	G	6.45765e-07	3.63059e-05	0	0	0	0	0.0030415	0.000972172
k__Bacteria|p__Proteobacteria|c__Gammaproteobacteria|o__Enterobacteriales|f__Enterobacteriaceae|g__Providencia	g__Providencia	G	8.06295e-08	5.55317e-06	0	0	0	0	0.0004615	0.000243043
k__Bacteria|p__Cyanobacteria|c__Cyanobacteria_noname|o__Oscillatoriales|f__Oscillatoriales_noname|g__Pseudanabaena	g__Pseudanabaena	G	0	0	0	0	0	0	0	0
k__Bacteria|p__Proteobacteria|c__Gammaproteobacteria|o__Alteromonadales|f__Pseudoalteromonadaceae|g__Pseudoalteromonas	g__Pseudoalteromonas	G	2.8436e-09	2.57954e-07	0	0	0	0	2.34e-05	0.000121521
k__Bacteria|p__Firmicutes|c__Clostridia|o__Clostridiales|f__Clostridiales_noname|g__Pseudoflavonifractor	g__Pseudoflavonifractor	G	0.000167123	0.000677948	0	0	0	0.0001651	0.0476163	0.448414
k__Bacteria|p__Proteobacteria|c__Gammaproteobacteria|o__Pseudomonadales|f__Pseudomonadaceae|g__Pseudomonas	g__Pseudomonas	G	0.000113841	0.00219413	0	0	0	0	0.116671	0.0460566
k__Bacteria|p__Firmicutes|c__Clostridia|o__Clostridiales|f__Eubacteriaceae|g__Pseudoramibacter	g__Pseudoramibacter	G	1.77421e-08	1.60946e-06	0	0	0	0	0.000146	0.000121521
k__Bacteria|p__Synergistetes|c__Synergistia|o__Synergistales|f__Synergistaceae|g__Pyramidobacter	g__Pyramidobacter	G	1.6796e-06	4.56215e-05	0	0	0	0	0.002791	0.00291651
k__Bacteria|p__Proteobacteria|c__Gammaproteobacteria|o__Enterobacteriales|f__Enterobacteriaceae|g__Raoultella	g__Raoultella	G	6.46604e-05	0.00412082	0	0	0	0	0.368565	0.00595455
k__Viruses|p__Viruses_noname|c__Viruses_noname|o__Mononegavirales|f__Paramyxoviridae|g__Respirovirus	g__Respirovirus	G	2.22358e-06	0.00014386	0	0	0	0	0.0103574	0.000243043
k__Viruses|p__Viruses_noname|c__Viruses_noname|o__Viruses_noname|f__Retroviridae|g__Retroviridae_noname	g__Retroviridae_noname	G	1.19075e-06	3.21612e-05	0	0	0	0	0.0020131	0.00243043
k__Bacteria|p__Proteobacteria|c__Alphaproteobacteria|o__Rhizobiales|f__Rhizobiaceae|g__Rhizobium	g__Rhizobium	G	3.16199e-08	2.29722e-06	0	0	0	0	0.0001993	0.000243043
k__Bacteria|p__Proteobacteria|c__Alphaproteobacteria|o__Rickettsiales|f__Rickettsiaceae|g__Rickettsia	g__Rickettsia	G	9.21619e-08	8.36036e-06	0	0	0	0	0.0007584	0.000121521
k__Bacteria|p__Firmicutes|c__Clostridia|o__Clostridiales|f__Lachnospiraceae|g__Roseburia	g__Roseburia	G	0.0104735	0.0146841	0	0.0026753	0.0059856	0.0127294	0.269038	0.99599
k__Viruses|p__Viruses_noname|c__Viruses_noname|o__Herpesvirales|f__Herpesviridae|g__Roseolovirus	g__Roseolovirus	G	1.118e-09	1.01418e-07	0	0	0	0	9.2e-06	0.000121521
k__Bacteria|p__Actinobacteria|c__Actinobacteria|o__Actinomycetales|f__Micrococcaceae|g__Rothia	g__Rothia	G	0.000100657	0.000587741	0	0	0	5.1e-06	0.0353303	0.251549
k__Bacteria|p__Actinobacteria|c__Actinobacteria|o__Rubrobacterales|f__Rubrobacteraceae|g__Rubrobacter	g__Rubrobacter	G	2.26516e-08	2.05481e-06	0	0	0	0	0.0001864	0.000121521
k__Viruses|p__Viruses_noname|c__Viruses_noname|o__Mononegavirales|f__Paramyxoviridae|g__Rubulavirus	g__Rubulavirus	G	9.41909e-06	0.000411689	0	0	0	0	0.0244772	0.000972172
k__Bacteria|p__Firmicutes|c__Clostridia|o__Clostridiales|f__Ruminococcaceae|g__Ruminococcaceae_noname	g__Ruminococcaceae_noname	G	0.000134205	0.00094973	0	0	0	0	0.0512773	0.201604
k__Bacteria|p__Firmicutes|c__Clostridia|o__Clostridiales|f__Ruminococcaceae|g__Ruminococcus	g__Ruminococcus	G	0.00760663	0.0133522	0	0.0007707	0.0035934	0.0090719	0.326214	0.870215
k__Eukaryota|p__Ascomycota|c__Saccharomycetes|o__Saccharomycetales|f__Saccharomycetaceae|g__Saccharomyces	g__Saccharomyces	G	7.86336e-06	9.01416e-05	0	0	0	0	0.0051959	0.0325677
k__Eukaryota|p__Ascomycota|c__Saccharomycetes|o__Saccharomycetales|f__Saccharomycetaceae|g__Saccharomycetaceae_unclassified	g__Saccharomycetaceae_unclassified	G	1.37454e-06	2.04049e-05	0	0	0	0	0.0009082	0.00729129
k__Bacteria|p__Bacteroidetes|c__Bacteroidetes_noname|o__Bacteroidetes_Order_II_Incertae_sedis|f__Rhodothermaceae|g__Salinibacter	g__Salinibacter	G	4.21218e-07	2.20117e-05	0	0	0	0	0.0018217	0.00121521
k__Bacteria|p__Proteobacteria|c__Gammaproteobacteria|o__Enterobacteriales|f__Enterobacteriaceae|g__Salmonella	g__Salmonella	G	5.21382e-06	0.0004064	0	0	0	0	0.0366771	0.00243043
k__Bacteria|p__Actinobacteria|c__Actinobacteria|o__Bifidobacteriales|f__Bifidobacteriaceae|g__Scardovia	g__Scardovia	G	3.18374e-06	4.54677e-05	0	0	0	0	0.0015349	0.011423
k__Eukaryota|p__Ascomycota|c__Schizosaccharomycetes|o__Schizosaccharomycetales|f__Schizosaccharomycetaceae|g__Schizosaccharomyces	g__Schizosaccharomyces	G	1.33733e-06	6.26146e-05	0	0	0	0	0.0048664	0.00109369
k__Viruses|p__Viruses_noname|c__Viruses_noname|o__Caudovirales|f__Myoviridae|g__Schizot4likevirus	g__Schizot4likevirus	G	6.76978e-06	0.000189387	0	0	0	0	0.010958	0.00218739
k__Bacteria|p__Firmicutes|c__Negativicutes|o__Selenomonadales|f__Veillonellaceae|g__Selenomonas	g__Selenomonas	G	0.000115423	0.00311419	0	0	0	0	0.179714	0.00449629
k__Bacteria|p__Proteobacteria|c__Gammaproteobacteria|o__Enterobacteriales|f__Enterobacteriaceae|g__Serratia	g__Serratia	G	4.77656e-06	0.000262377	0	0	0	0	0.0224072	0.00157978
k__Bacteria|p__Proteobacteria|c__Gammaproteobacteria|o__Enterobacteriales|f__Enterobacteriaceae|g__Shigella	g__Shigella	G	1.13115e-06	7.55916e-05	0	0	0	0	0.0067612	0.000972172
k__Bacteria|p__Firmicutes|c__Clostridia|o__Clostridiales|f__Lachnospiraceae|g__Shuttleworthia	g__Shuttleworthia	G	1.035e-07	9.38887e-06	0	0	0	0	0.0008517	0.000121521
k__Viruses|p__Viruses_noname|c__Viruses_noname|o__Herpesvirales|f__Herpesviridae|g__Simplexvirus	g__Simplexvirus	G	1.29262e-07	1.17259e-05	0	0	0	0	0.0010637	0.000121521
k__Viruses|p__Viruses_noname|c__Viruses_noname|o__Caudovirales|f__Siphoviridae|g__Siphoviridae_noname	g__Siphoviridae_noname	G	0.00235344	0.0148758	0	0	0	0	0.421446	0.122737
k__Bacteria|p__Actinobacteria|c__Actinobacteria|o__Coriobacteriales|f__Coriobacteriaceae|g__Slackia	g__Slackia	G	2.25861e-05	0.000213066	0	0	0	0	0.0098431	0.0497023
k__Bacteria|p__Firmicutes|c__Erysipelotrichia|o__Erysipelotrichales|f__Erysipelotrichaceae|g__Solobacterium	g__Solobacterium	G	1.78637e-07	1.62048e-05	0	0	0	0	0.00147	0.000121521
k__Viruses|p__Viruses_noname|c__Viruses_noname|o__Caudovirales|f__Podoviridae|g__Sp6likevirus	g__Sp6likevirus	G	2.0158e-07	1.82861e-05	0	0	0	0	0.0016588	0.000121521
k__Bacteria|p__Proteobacteria|c__Alphaproteobacteria|o__Sphingomonadales|f__Sphingomonadaceae|g__Sphingobium	g__Sphingobium	G	1.54575e-08	1.40221e-06	0	0	0	0	0.0001272	0.000121521
k__Bacteria|p__Firmicutes|c__Bacilli|o__Bacillales|f__Staphylococcaceae|g__Staphylococcus	g__Staphylococcus	G	8.37e-06	0.000119537	0	0	0	0	0.0061066	0.0153117
k__Bacteria|p__Proteobacteria|c__Gammaproteobacteria|o__Xanthomonadales|f__Xanthomonadaceae|g__Stenotrophomonas	g__Stenotrophomonas	G	9.19565e-07	5.56262e-05	0	0	0	0	0.0048546	0.00109369
k__Bacteria|p__Firmicutes|c__Clostridia|o__Clostridiales|f__Lachnospiraceae|g__Stomatobaculum	g__Stomatobaculum	G	1.98844e-06	3.76154e-05	0	0	0	0	0.0018574	0.00947867
k__Bacteria|p__Firmicutes|c__Bacilli|o__Lactobacillales|f__Streptococcaceae|g__Streptococcus	g__Streptococcus	G	0.00060598	0.00239665	0	0	0	0.0002806	0.0554315	0.433589
k__Bacteria|p__Firmicutes|c__Clostridia|o__Clostridiales|f__Ruminococcaceae|g__Subdoligranulum	g__Subdoligranulum	G	0.0568976	0.057309	0	0.0189094	0.0385108	0.0753469	0.552682	0.999878
k__Bacteria|p__Proteobacteria|c__Gammaproteobacteria|o__Aeromonadales|f__Succinivibrionaceae|g__Succinatimonas	g__Succinatimonas	G	3.44176e-05	0.000728195	0	0	0	0	0.0574506	0.0212663
k__Bacteria|p__Proteobacteria|c__Betaproteobacteria|o__Burkholderiales|f__Sutterellaceae|g__Sutterella	g__Sutterella	G	0.0445613	0.0683299	0	0	0.0075363	0.0691343	0.626725	0.720379
k__Bacteria|p__Proteobacteria|c__Betaproteobacteria|o__Burkholderiales|f__Sutterellaceae|g__Sutterellaceae_unclassified	g__Sutterellaceae_unclassified	G	0.00958866	0.0237436	0	0	0	0.0053409	0.370735	0.397011
k__Bacteria|p__Synergistetes|c__Synergistia|o__Synergistales|f__Synergistaceae|g__Synergistes	g__Synergistes	G	3.97013e-05	0.00136464	0	0	0	0	0.0959154	0.00194434
k__Viruses|p__Viruses_noname|c__Viruses_noname|o__Caudovirales|f__Myoviridae|g__T4likevirus	g__T4likevirus	G	1.18334e-05	0.000581345	0	0	0	0	0.0353153	0.000607607
k__Viruses|p__Viruses_noname|c__Viruses_noname|o__Caudovirales|f__Siphoviridae|g__T5likevirus	g__T5likevirus	G	9.40555e-05	0.00539803	0	0	0	0	0.455367	0.000972172
k__Viruses|p__Viruses_noname|c__Viruses_noname|o__Caudovirales|f__Podoviridae|g__T7likevirus	g__T7likevirus	G	1.62896e-05	0.00119459	0	0	0	0	0.104169	0.000243043
k__Bacteria|p__Bacteroidetes|c__Bacteroidia|o__Bacteroidales|f__Porphyromonadaceae|g__Tannerella	g__Tannerella	G	2.05578e-07	1.67945e-05	0	0	0	0	0.001513	0.000243043
k__Viruses|p__Viruses_noname|c__Viruses_noname|o__Viruses_noname|f__Tectiviridae|g__Tectivirus	g__Tectivirus	G	1.06805e-06	9.68871e-05	0	0	0	0	0.008789	0.000121521
k__Bacteria|p__Thermotogae|c__Thermotogae|o__Thermotogales|f__Thermotogaceae|g__Thermosipho	g__Thermosipho	G	3.71248e-08	3.36773e-06	0	0	0	0	0.0003055	0.000121521
k__Bacteria|p__Proteobacteria|c__Betaproteobacteria|o__Burkholderiales|f__Burkholderiales_noname|g__Thiomonas	g__Thiomonas	G	1.86924e-07	1.02569e-05	0	0	0	0	0.0007389	0.000364564
k__Viruses|p__Viruses_noname|c__Viruses_noname|o__Viruses_noname|f__Totiviridae|g__Totivirus	g__Totivirus	G	0	0	0	0	0	0	0	0
k__Bacteria|p__Spirochaetes|c__Spirochaetia|o__Spirochaetales|f__Spirochaetaceae|g__Treponema	g__Treponema	G	0.000238456	0.00739058	0	0	0	0	0.396368	0.00206586
k__Viruses|p__Viruses_noname|c__Viruses_noname|o__Caudovirales|f__Siphoviridae|g__Tunalikevirus	g__Tunalikevirus	G	8.54668e-05	0.0042064	0	0	0	0	0.351102	0.00133674
k__Bacteria|p__Firmicutes|c__Erysipelotrichia|o__Erysipelotrichales|f__Erysipelotrichaceae|g__Turicibacter	g__Turicibacter	G	8.32607e-06	0.000105422	0	0	0	0	0.0038636	0.0204156
k__Bacteria|p__Actinobacteria|c__Actinobacteria|o__Actinomycetales|f__Actinomycetaceae|g__Varibaculum	g__Varibaculum	G	1.8532e-08	1.68111e-06	0	0	0	0	0.0001525	0.000121521
k__Bacteria|p__Firmicutes|c__Negativicutes|o__Selenomonadales|f__Veillonellaceae|g__Veillonella	g__Veillonella	G	0.000269439	0.00202471	0	0	0	6.85e-05	0.136324	0.330295
k__Bacteria|p__Proteobacteria|c__Gammaproteobacteria|o__Vibrionales|f__Vibrionaceae|g__Vibrio	g__Vibrio	G	1.11676e-06	4.00514e-05	0	0	0	0	0.003232	0.00279499
k__Viruses|p__Viruses_noname|c__Viruses_noname|o__Viruses_noname|f__Viruses_noname|g__Viruses_noname	g__Viruses_noname	G	8.85094e-06	0.000415997	0	0	0	0	0.0335808	0.00182282
k__Bacteria|p__Firmicutes|c__Bacilli|o__Lactobacillales|f__Leuconostocaceae|g__Weissella	g__Weissella	G	1.23717e-06	7.28532e-05	0	0	0	0	0.006175	0.000972172
k__Bacteria|p__Proteobacteria|c__Alphaproteobacteria|o__Rickettsiales|f__Anaplasmataceae|g__Wolbachia	g__Wolbachia	G	1.80338e-08	1.16812e-06	0	0	0	0	0.0001003	0.000364564
k__Bacteria|p__Proteobacteria|c__Epsilonproteobacteria|o__Campylobacterales|f__Helicobacteraceae|g__Wolinella	g__Wolinella	G	1.64054e-08	1.4882e-06	0	0	0	0	0.000135	0.000121521
k__Bacteria|p__Proteobacteria|c__Gammaproteobacteria|o__Enterobacteriales|f__Enterobacteriaceae|g__Yersinia	g__Yersinia	G	6.46638e-06	0.000256391	0	0	0	0	0.0184101	0.00194434
k__Viruses|p__Viruses_noname|c__Viruses_noname|o__Caudovirales|f__Siphoviridae|g__Yualikevirus	g__Yualikevirus	G	9.95868e-08	9.0339e-06	0	0	0	0	0.0008195	0.000121521
k__Archaea	k__Archaea	K	5.46223e-05	0.00110491	0	0	0	0	0.0888851	0.0957589
k__Bacteria	k__Bacteria	K	0.995528	0.0211796	0.526459	0.999078	1	1	1	1
k__Eukaryota	k__Eukaryota	K	1.69916e-05	0.000215652	0	0	0	0	0.0149567	0.0436262
k__Viruses	k__Viruses	O	0.00440073	0.0211261	0	0	0	0.0007317	0.473541	0.408069
k__Bacteria|p__Acidobacteria|c__Acidobacteriia|o__Acidobacteriales	o__Acidobacteriales	O	2.01847e-08	1.83103e-06	0	0	0	0	0.0001661	0.000121521
k__Bacteria|p__Actinobacteria|c__Actinobacteria|o__Actinobacteria_noname	o__Actinobacteria_noname	O	1.10098e-08	7.84388e-07	0	0	0	0	6.72e-05	0.000243043
k__Bacteria|p__Actinobacteria|c__Actinobacteria|o__Actinomycetales	o__Actinomycetales	O	0.000139471	0.000670222	0	0	0	4.52e-05	0.0358455	0.306599
k__Bacteria|p__Proteobacteria|c__Gammaproteobacteria|o__Aeromonadales	o__Aeromonadales	O	4.75593e-05	0.000968887	0	0	0	0	0.0574506	0.022603
k__Bacteria|p__Proteobacteria|c__Alphaproteobacteria|o__Alphaproteobacteria_noname	o__Alphaproteobacteria_noname	O	2.00147e-06	5.15869e-05	0	0	0	0	0.0042217	0.00777737
k__Bacteria|p__Proteobacteria|c__Gammaproteobacteria|o__Alteromonadales	o__Alteromonadales	O	2.8436e-09	2.57954e-07	0	0	0	0	2.34e-05	0.000121521
k__Bacteria|p__Firmicutes|c__Bacilli|o__Bacillales	o__Bacillales	O	1.145e-05	0.000200667	0	0	0	0	0.0144081	0.0188358
k__Bacteria|p__Bacteroidetes|c__Bacteroidia|o__Bacteroidales	o__Bacteroidales	O	0.604682	0.175309	0	0.494666	0.626029	0.733833	0.991516	0.999878
k__Bacteria|p__Bacteroidetes|c__Bacteroidetes_noname|o__Bacteroidetes_noname	o__Bacteroidetes_noname	O	5.27889e-08	4.78869e-06	0	0	0	0	0.0004344	0.000121521
k__Bacteria|p__Bacteroidetes|c__Bacteroidetes_noname|o__Bacteroidetes_Order_II_Incertae_sedis	o__Bacteroidetes_Order_II_Incertae_sedis	O	4.21218e-07	2.20117e-05	0	0	0	0	0.0018217	0.00121521
k__Bacteria|p__Actinobacteria|c__Actinobacteria|o__Bifidobacteriales	o__Bifidobacteriales	O	0.0233394	0.0379534	0	0.0031552	0.0110241	0.0273751	0.491354	0.938267
k__Bacteria|p__Proteobacteria|c__Betaproteobacteria|o__Burkholderiales	o__Burkholderiales	O	0.0555768	0.0671577	0	0.0053635	0.0317833	0.0820614	0.626725	0.980435
k__Bacteria|p__Proteobacteria|c__Epsilonproteobacteria|o__Campylobacterales	o__Campylobacterales	O	1.00043e-05	0.00034869	0	0	0	0	0.0258161	0.00874954
k__Bacteria|p__Candidatus_Saccharibacteria|c__Candidatus_Saccharibacteria_noname|o__Candidatus_Saccharibacteria_noname	o__Candidatus_Saccharibacteria_noname	O	3.48937e-07	1.33301e-05	0	0	0	0	0.0010889	0.00230891
k__Bacteria|p__Proteobacteria|c__Gammaproteobacteria|o__Cardiobacteriales	o__Cardiobacteriales	O	1.65998e-08	1.00085e-06	0	0	0	0	6.89e-05	0.000364564
k__Viruses|p__Viruses_noname|c__Viruses_noname|o__Caudovirales	o__Caudovirales	O	0.00405637	0.0206215	0	0	0	0.0002342	0.473541	0.343177
k__Bacteria|p__Firmicutes|c__Clostridia|o__Clostridiales	o__Clostridiales	O	0.227685	0.143545	0.0005516	0.121406	0.195166	0.302279	0.982459	1
k__Bacteria|p__Actinobacteria|c__Actinobacteria|o__Coriobacteriales	o__Coriobacteriales	O	0.00794714	0.00992863	0	0.0023622	0.0051543	0.009984	0.195359	0.993073
k__Bacteria|p__Deferribacteres|c__Deferribacteres|o__Deferribacterales	o__Deferribacterales	O	9.77032e-09	8.86304e-07	0	0	0	0	8.04e-05	0.000121521
k__Bacteria|p__Deinococcus_Thermus|c__Deinococci|o__Deinococcales	o__Deinococcales	O	2.67469e-08	2.42631e-06	0	0	0	0	0.0002201	0.000121521
k__Bacteria|p__Proteobacteria|c__Deltaproteobacteria|o__Desulfovibrionales	o__Desulfovibrionales	O	0.018554	0.018848	0	0.0046353	0.0140504	0.0263384	0.225693	0.90898
k__Bacteria|p__Proteobacteria|c__Gammaproteobacteria|o__Enterobacteriales	o__Enterobacteriales	O	0.0135209	0.0619895	0	0	0.0004389	0.0023146	0.833565	0.745048
k__Bacteria|p__Firmicutes|c__Erysipelotrichia|o__Erysipelotrichales	o__Erysipelotrichales	O	0.000568303	0.00205416	0	0	0.0001131	0.0004438	0.0707051	0.695224
k__Eukaryota|p__Apicomplexa|c__Coccidia|o__Eucoccidiorida	o__Eucoccidiorida	O	1.57249e-08	1.31781e-06	0	0	0	0	0.0001191	0.000243043
k__Eukaryota|p__Eukaryota_noname|c__Eukaryota_noname|o__Eukaryota_noname	o__Eukaryota_noname	O	1.92818e-07	8.30018e-06	0	0	0	0	0.0006127	0.00121521
k__Eukaryota|p__Ascomycota|c__Eurotiomycetes|o__Eurotiales	o__Eurotiales	O	2.50157e-06	5.32947e-05	0	0	0	0	0.0019905	0.00352412
k__Bacteria|p__Fusobacteria|c__Fusobacteriia|o__Fusobacteriales	o__Fusobacteriales	O	2.19843e-05	0.000797892	0	0	0	0	0.040867	0.00498238
k__Eukaryota|p__Apicomplexa|c__Aconoidasida|o__Haemosporida	o__Haemosporida	O	1.0802e-07	5.26383e-06	0	0	0	0	0.0003556	0.000729129
k__Archaea|p__Euryarchaeota|c__Halobacteria|o__Halobacteriales	o__Halobacteriales	O	1.09519e-06	5.2274e-05	0	0	0	0	0.0043287	0.00133674
k__Viruses|p__Viruses_noname|c__Viruses_noname|o__Herpesvirales	o__Herpesvirales	O	1.3038e-07	1.17263e-05	0	0	0	0	0.0010637	0.000243043
k__Eukaryota|p__Ascomycota|c__Sordariomycetes|o__Hypocreales	o__Hypocreales	O	2.57941e-07	1.0879e-05	0	0	0	0	0.0008138	0.00218739
k__Eukaryota|p__Eukaryota_noname|c__Eukaryota_noname|o__Kinetoplastida	o__Kinetoplastida	O	1.41147e-06	0.000126642	0	0	0	0	0.0114875	0.000243043
k__Bacteria|p__Firmicutes|c__Bacilli|o__Lactobacillales	o__Lactobacillales	O	0.00116589	0.00449388	0	0	2.93e-05	0.0006842	0.168679	0.528983
k__Archaea|p__Euryarchaeota|c__Methanobacteria|o__Methanobacteriales	o__Methanobacteriales	O	5.21432e-05	0.00110197	0	0	0	0	0.0888851	0.093693
k__Archaea|p__Euryarchaeota|c__Methanomicrobia|o__Methanomicrobia_noname	o__Methanomicrobia_noname	O	1.01198e-06	5.05516e-05	0	0	0	0	0.0039706	0.00121521
k__Archaea|p__Euryarchaeota|c__Methanomicrobia|o__Methanomicrobiales	o__Methanomicrobiales	O	3.72026e-07	3.36719e-05	0	0	0	0	0.0030545	0.000243043
k__Viruses|p__Viruses_noname|c__Viruses_noname|o__Mononegavirales	o__Mononegavirales	O	1.16427e-05	0.000436053	0	0	0	0	0.0244772	0.00121521
k__Bacteria|p__Tenericutes|c__Mollicutes|o__Mycoplasmatales	o__Mycoplasmatales	O	1.30128e-05	0.000191781	0	0	0	0	0.0062634	0.0119091
k__Bacteria|p__Proteobacteria|c__Betaproteobacteria|o__Neisseriales	o__Neisseriales	O	1.74088e-06	6.81301e-05	0	0	0	0	0.0058747	0.00498238
k__Bacteria|p__Proteobacteria|c__Gammaproteobacteria|o__Oceanospirillales	o__Oceanospirillales	O	4.88662e-07	1.68013e-05	0	0	0	0	0.0008036	0.000972172
k__Bacteria|p__Cyanobacteria|c__Cyanobacteria_noname|o__Oscillatoriales	o__Oscillatoriales	O	1.04022e-08	9.43627e-07	0	0	0	0	8.56e-05	0.000121521
k__Bacteria|p__Proteobacteria|c__Gammaproteobacteria|o__Pasteurellales	o__Pasteurellales	O	0.000654581	0.0058709	0	0	0	0.0001482	0.341881	0.324098
k__Viruses|p__Viruses_noname|c__Viruses_noname|o__Picornavirales	o__Picornavirales	O	9.49326e-08	4.77668e-06	0	0	0	0	0.0003737	0.000607607
k__Bacteria|p__Proteobacteria|c__Gammaproteobacteria|o__Pseudomonadales	o__Pseudomonadales	O	0.000125653	0.00221374	0	0	0	0	0.116671	0.0567505
k__Bacteria|p__Proteobacteria|c__Alphaproteobacteria|o__Rhizobiales	o__Rhizobiales	O	1.34508e-06	3.2923e-05	0	0	0	0	0.0020906	0.00328108
k__Bacteria|p__Proteobacteria|c__Alphaproteobacteria|o__Rhodobacterales	o__Rhodobacterales	O	6.33127e-09	5.74334e-07	0	0	0	0	5.21e-05	0.000121521
k__Bacteria|p__Proteobacteria|c__Alphaproteobacteria|o__Rhodospirillales	o__Rhodospirillales	O	8.06789e-06	0.000186685	0	0	0	0	0.0106203	0.00303804
k__Bacteria|p__Proteobacteria|c__Alphaproteobacteria|o__Rickettsiales	o__Rickettsiales	O	1.10196e-07	8.44137e-06	0	0	0	0	0.0007584	0.000486086
k__Bacteria|p__Actinobacteria|c__Actinobacteria|o__Rubrobacterales	o__Rubrobacterales	O	2.26516e-08	2.05481e-06	0	0	0	0	0.0001864	0.000121521
k__Eukaryota|p__Ascomycota|c__Saccharomycetes|o__Saccharomycetales	o__Saccharomycetales	O	1.11385e-05	0.000117242	0	0	0	0	0.0051959	0.0348767
k__Eukaryota|p__Ascomycota|c__Schizosaccharomycetes|o__Schizosaccharomycetales	o__Schizosaccharomycetales	O	1.33733e-06	6.26146e-05	0	0	0	0	0.0048664	0.00109369
k__Bacteria|p__Firmicutes|c__Negativicutes|o__Selenomonadales	o__Selenomonadales	O	0.0187686	0.0309399	0	0.0007698	0.0081321	0.0234925	0.547559	0.839713
k__Bacteria|p__Proteobacteria|c__Alphaproteobacteria|o__Sphingomonadales	o__Sphingomonadales	O	1.80945e-08	1.41238e-06	0	0	0	0	0.0001272	0.000364564
k__Bacteria|p__Spirochaetes|c__Spirochaetia|o__Spirochaetales	o__Spirochaetales	O	0.000241165	0.00739239	0	0	0	0	0.396368	0.00935715
k__Bacteria|p__Synergistetes|c__Synergistia|o__Synergistales	o__Synergistales	O	4.15271e-05	0.00136546	0	0	0	0	0.0959154	0.00583303
k__Bacteria|p__Thermotogae|c__Thermotogae|o__Thermotogales	o__Thermotogales	O	3.71248e-08	3.36773e-06	0	0	0	0	0.0003055	0.000121521
k__Eukaryota|p__Basidiomycota|c__Tremellomycetes|o__Tremellales	o__Tremellales	O	2.81565e-08	2.55419e-06	0	0	0	0	0.0002317	0.000121521
k__Viruses|p__Viruses_noname|c__Viruses_noname|o__Tymovirales	o__Tymovirales	O	0	0	0	0	0	0	0	0
k__Bacteria|p__Verrucomicrobia|c__Verrucomicrobiae|o__Verrucomicrobiales	o__Verrucomicrobiales	O	0.0223958	0.0445957	0	4.6e-05	0.0040927	0.025468	0.726547	0.781991
k__Bacteria|p__Proteobacteria|c__Gammaproteobacteria|o__Vibrionales	o__Vibrionales	O	1.11676e-06	4.00514e-05	0	0	0	0	0.003232	0.00279499
k__Viruses|p__Viruses_noname|c__Viruses_noname|o__Viruses_noname	o__Viruses_noname	O	0.000332486	0.00410491	0	0	0	0	0.291776	0.100012
k__Bacteria|p__Proteobacteria|c__Gammaproteobacteria|o__Xanthomonadales	o__Xanthomonadales	O	9.19565e-07	5.56262e-05	0	0	0	0	0.0048546	0.00109369
k__Bacteria|p__Acidobacteria	p__Acidobacteria	P	2.01847e-08	1.83103e-06	0	0	0	0	0.0001661	0.000121521
k__Bacteria|p__Actinobacteria	p__Actinobacteria	P	0.031426	0.0432049	0	0.0073851	0.0177382	0.0377707	0.500554	0.99842
k__Eukaryota|p__Apicomplexa	p__Apicomplexa	P	1.23745e-07	5.42596e-06	0	0	0	0	0.0003556	0.000972172
k__Eukaryota|p__Ascomycota	p__Ascomycota	P	1.52354e-05	0.000143967	0	0	0	0	0.0051959	0.0413173
k__Bacteria|p__Bacteroidetes	p__Bacteroidetes	P	0.604683	0.175309	0	0.494666	0.626029	0.733833	0.991516	0.999878
k__Eukaryota|p__Basidiomycota	p__Basidiomycota	P	2.81565e-08	2.55419e-06	0	0	0	0	0.0002317	0.000121521
k__Bacteria|p__Candidatus_Saccharibacteria	p__Candidatus_Saccharibacteria	P	3.48937e-07	1.33301e-05	0	0	0	0	0.0010889	0.00230891
k__Bacteria|p__Cyanobacteria	p__Cyanobacteria	P	1.04022e-08	9.43627e-07	0	0	0	0	8.56e-05	0.000121521
k__Bacteria|p__Deferribacteres	p__Deferribacteres	P	9.77032e-09	8.86304e-07	0	0	0	0	8.04e-05	0.000121521
k__Bacteria|p__Deinococcus_Thermus	p__Deinococcus_Thermus	P	2.67469e-08	2.42631e-06	0	0	0	0	0.0002201	0.000121521
k__Eukaryota|p__Eukaryota_noname	p__Eukaryota_noname	P	1.60429e-06	0.000126912	0	0	0	0	0.0114875	0.00145826
k__Archaea|p__Euryarchaeota	p__Euryarchaeota	P	5.46223e-05	0.00110491	0	0	0	0	0.0888851	0.0957589
k__Bacteria|p__Firmicutes	p__Firmicutes	P	0.2482	0.149756	0.0005516	0.136924	0.213789	0.326152	0.983039	1
k__Bacteria|p__Fusobacteria	p__Fusobacteria	P	2.19843e-05	0.000797892	0	0	0	0	0.040867	0.00498238
k__Bacteria|p__Proteobacteria	p__Proteobacteria	P	0.0885053	0.0900157	0	0.029416	0.0613419	0.119317	0.848763	0.997691
k__Bacteria|p__Spirochaetes	p__Spirochaetes	P	0.000241165	0.00739239	0	0	0	0	0.396368	0.00935715
k__Bacteria|p__Synergistetes	p__Synergistetes	P	4.15271e-05	0.00136546	0	0	0	0	0.0959154	0.00583303
k__Bacteria|p__Tenericutes	p__Tenericutes	P	1.30128e-05	0.000191781	0	0	0	0	0.0062634	0.0119091
k__Bacteria|p__Thermotogae	p__Thermotogae	P	3.71248e-08	3.36773e-06	0	0	0	0	0.0003055	0.000121521
k__Bacteria|p__Verrucomicrobia	p__Verrucomicrobia	P	0.0223958	0.0445957	0	4.6e-05	0.0040927	0.025468	0.726547	0.781991
k__Viruses|p__Viruses_noname	p__Viruses_noname	P	0.00440073	0.0211261	0	0	0	0.0007317	0.473541	0.408069
k__Bacteria|p__Firmicutes|c__Clostridia|o__Clostridiales|f__Ruminococcaceae|g__Subdoligranulum|s__Subdoligranulum_unclassified	s__Subdoligranulum_unclassified	S	0.056785	0.0571611	0	0.0189068	0.0384524	0.0751756	0.552682	0.999878	Y	at Species level	at Family level (Clostridiaceae)	at Family level (Clostridiaceae)	Replicates at Family level (Clostridiaceae)	Replicates at Family level (Clostridiaceae)
k__Bacteria|p__Firmicutes|c__Clostridia|o__Clostridiales|f__Ruminococcaceae|g__Faecalibacterium|s__Faecalibacterium_prausnitzii	s__Faecalibacterium_prausnitzii	S	0.0854067	0.0718329	0	0.0348113	0.0663509	0.114541	0.682581	0.998663	Y	at Species level	at Genus level	at Genus level	at Species level	at Genus level
k__Bacteria|p__Firmicutes|c__Clostridia|o__Clostridiales|f__Oscillospiraceae|g__Oscillibacter|s__Oscillibacter_unclassified	s__Oscillibacter_unclassified	S	0.0155161	0.0204755	0	0.0044318	0.0095912	0.019758	0.762409	0.997083	Y	at Order level (Clostridiales)	at Order level (Clostridiales)	at Genus level	at Genus level	at Genus level
k__Bacteria|p__Bacteroidetes|c__Bacteroidia|o__Bacteroidales|f__Bacteroidaceae|g__Bacteroides|s__Bacteroides_uniformis	s__Bacteroides_uniformis	S	0.0521612	0.0702365	0	0.0090179	0.0263468	0.0666151	0.727296	0.986025	Y	at Species level	at Genus level	at Genus level	at Genus level	at Genus level
k__Bacteria|p__Bacteroidetes|c__Bacteroidia|o__Bacteroidales|f__Rikenellaceae|g__Alistipes|s__Alistipes_putredinis	s__Alistipes_putredinis	S	0.120529	0.0936541	0	0.0402178	0.114336	0.182213	0.6127	0.9808	Y	at Species level	at Genus level	at order level (Bacteroidales)	at Genus level	at order level (Bacteroidales)
k__Bacteria|p__Firmicutes|c__Clostridia|o__Clostridiales|f__Eubacteriaceae|g__Eubacterium|s__Eubacterium_rectale	s__Eubacterium_rectale	S	0.0172837	0.0312714	0	0.0022757	0.007504	0.0201273	0.6178	0.961721	Y	at Genus level (Eubacterium)	at Genus level	at Family level (Clostridiaceae)	at Genus level	at Family level (Clostridiaceae)
k__Bacteria|p__Bacteroidetes|c__Bacteroidia|o__Bacteroidales|f__Bacteroidaceae|g__Bacteroides|s__Bacteroides_vulgatus	s__Bacteroides_vulgatus	S	0.0259041	0.0478357	0	0.0028702	0.0095799	0.0271704	0.692646	0.960262	Y	at Species level	at Genus level	at Genus level	at Genus level	at Genus level
k__Bacteria|p__Bacteroidetes|c__Bacteroidia|o__Bacteroidales|f__Rikenellaceae|g__Alistipes|s__Alistipes_onderdonkii	s__Alistipes_onderdonkii	S	0.045283	0.0817125	0	0.0033902	0.0148623	0.0504744	0.781941	0.954429	Y	at Genus level (Alistipes sp.)	at Genus level	at order level (Bacteroidales)	at Genus level	at order level (Bacteroidales)
k__Bacteria|p__Bacteroidetes|c__Bacteroidia|o__Bacteroidales|f__Rikenellaceae|g__Alistipes|s__Alistipes_shahii	s__Alistipes_shahii	S	0.0434043	0.0459721	0	0.010462	0.0313484	0.0615758	0.801633	0.953579	Y	at Genus level (Alistipes sp.)	at Genus level	at order level (Bacteroidales)	at Genus level	at order level (Bacteroidales)
k__Bacteria|p__Firmicutes|c__Clostridia|o__Clostridiales|f__Lachnospiraceae|g__Lachnospiraceae_noname|s__Lachnospiraceae_bacterium_7_1_58FAA	s__Lachnospiraceae_bacterium_7_1_58FAA	S	0.00105018	0.00281819	0	0.0001273	0.000339	0.0008691	0.0940426	0.943371
k__Bacteria|p__Bacteroidetes|c__Bacteroidia|o__Bacteroidales|f__Bacteroidales_noname|g__Bacteroidales_noname|s__Bacteroidales_bacterium_ph8	s__Bacteroidales_bacterium_ph8	S	0.0418079	0.0494884	0	0.0082691	0.0259645	0.0566391	0.484246	0.924171
k__Bacteria|p__Actinobacteria|c__Actinobacteria|o__Coriobacteriales|f__Coriobacteriaceae|g__Collinsella|s__Collinsella_aerofaciens	s__Collinsella_aerofaciens	S	0.00719538	0.00927152	0	0.0018874	0.0045743	0.0091758	0.170906	0.912748
k__Bacteria|p__Bacteroidetes|c__Bacteroidia|o__Bacteroidales|f__Bacteroidaceae|g__Bacteroides|s__Bacteroides_dorei	s__Bacteroides_dorei	S	0.0184682	0.0473833	0	0.0004144	0.003697	0.0141676	0.657544	0.896707
k__Bacteria|p__Bacteroidetes|c__Bacteroidia|o__Bacteroidales|f__Bacteroidaceae|g__Bacteroides|s__Bacteroides_ovatus	s__Bacteroides_ovatus	S	0.00716041	0.01938	0	0.0002974	0.0016992	0.0060137	0.344993	0.892332
k__Bacteria|p__Proteobacteria|c__Deltaproteobacteria|o__Desulfovibrionales|f__Desulfovibrionaceae|g__Bilophila|s__Bilophila_unclassified	s__Bilophila_unclassified	S	0.0133966	0.0155618	0	0.0014951	0.0089067	0.0197566	0.194298	0.886499
k__Bacteria|p__Bacteroidetes|c__Bacteroidia|o__Bacteroidales|f__Porphyromonadaceae|g__Barnesiella|s__Barnesiella_intestinihominis	s__Barnesiella_intestinihominis	S	0.0150968	0.0189236	0	0.0022617	0.008643	0.0206706	0.203943	0.884069
k__Bacteria|p__Firmicutes|c__Clostridia|o__Clostridiales|f__Lachnospiraceae|g__Roseburia|s__Roseburia_hominis	s__Roseburia_hominis	S	0.00344801	0.00679681	0	0.000232	0.0011141	0.0036431	0.0922494	0.87702
k__Bacteria|p__Bacteroidetes|c__Bacteroidia|o__Bacteroidales|f__Rikenellaceae|g__Alistipes|s__Alistipes_finegoldii	s__Alistipes_finegoldii	S	0.00684905	0.0150779	0	0.000276	0.0019962	0.0070404	0.380231	0.86742
k__Bacteria|p__Actinobacteria|c__Actinobacteria|o__Bifidobacteriales|f__Bifidobacteriaceae|g__Bifidobacterium|s__Bifidobacterium_longum	s__Bifidobacterium_longum	S	0.00557531	0.010951	0	0.0005004	0.0023542	0.0062082	0.204725	0.860493
k__Bacteria|p__Firmicutes|c__Clostridia|o__Clostridiales|f__Lachnospiraceae|g__Roseburia|s__Roseburia_inulinivorans	s__Roseburia_inulinivorans	S	0.00235731	0.00481633	0	0.0001291	0.0007883	0.0024666	0.102418	0.828533
k__Bacteria|p__Bacteroidetes|c__Bacteroidia|o__Bacteroidales|f__Rikenellaceae|g__Alistipes|s__Alistipes_senegalensis	s__Alistipes_senegalensis	S	0.00355388	0.00588421	0	5.7e-05	0.0013037	0.0047566	0.145813	0.825374
k__Bacteria|p__Actinobacteria|c__Actinobacteria|o__Bifidobacteriales|f__Bifidobacteriaceae|g__Bifidobacterium|s__Bifidobacterium_adolescentis	s__Bifidobacterium_adolescentis	S	0.0154502	0.0304369	0	0.0005817	0.0053393	0.0167358	0.481636	0.820391
k__Bacteria|p__Firmicutes|c__Clostridia|o__Clostridiales|f__Eubacteriaceae|g__Eubacterium|s__Eubacterium_eligens	s__Eubacterium_eligens	S	0.00263826	0.00549682	0	0.0001431	0.0009272	0.0028308	0.140116	0.816624
k__Bacteria|p__Bacteroidetes|c__Bacteroidia|o__Bacteroidales|f__Porphyromonadaceae|g__Parabacteroides|s__Parabacteroides_distasonis	s__Parabacteroides_distasonis	S	0.00457944	0.0109166	0	0.0001114	0.0014503	0.0046443	0.275896	0.806052
k__Bacteria|p__Bacteroidetes|c__Bacteroidia|o__Bacteroidales|f__Bacteroidaceae|g__Bacteroides|s__Bacteroides_thetaiotaomicron	s__Bacteroides_thetaiotaomicron	S	0.00417879	0.0121657	0	8.65e-05	0.0012706	0.0041053	0.378023	0.7939
k__Bacteria|p__Verrucomicrobia|c__Verrucomicrobiae|o__Verrucomicrobiales|f__Verrucomicrobiaceae|g__Akkermansia|s__Akkermansia_muciniphila	s__Akkermansia_muciniphila	S	0.0223958	0.0445957	0	4.6e-05	0.0040927	0.025468	0.726547	0.781991
k__Bacteria|p__Bacteroidetes|c__Bacteroidia|o__Bacteroidales|f__Porphyromonadaceae|g__Parabacteroides|s__Parabacteroides_merdae	s__Parabacteroides_merdae	S	0.011485	0.0166765	0	8.65e-05	0.0061054	0.0156589	0.248321	0.765221
k__Bacteria|p__Bacteroidetes|c__Bacteroidia|o__Bacteroidales|f__Porphyromonadaceae|g__Odoribacter|s__Odoribacter_splanchnicus	s__Odoribacter_splanchnicus	S	0.0073906	0.00795503	0	0.0021364	0.0058801	0.0103809	0.217706	0.76279
k__Bacteria|p__Bacteroidetes|c__Bacteroidia|o__Bacteroidales|f__Prevotellaceae|g__Prevotella|s__Prevotella_copri	s__Prevotella_copri	S	0.0705738	0.158213	0	7.5e-06	0.000242	0.0327735	0.941133	0.754891
k__Bacteria|p__Firmicutes|c__Clostridia|o__Clostridiales|f__Lachnospiraceae|g__Dorea|s__Dorea_longicatena	s__Dorea_longicatena	S	0.000720061	0.00173974	0	0	0.0002309	0.0007112	0.0370995	0.749909
k__Bacteria|p__Firmicutes|c__Clostridia|o__Clostridiales|f__Lachnospiraceae|g__Blautia|s__Ruminococcus_obeum	s__Ruminococcus_obeum	S	0.000357448	0.00097763	0	0	0.0001405	0.0004087	0.054867	0.747357
k__Bacteria|p__Firmicutes|c__Clostridia|o__Clostridiales|f__Eubacteriaceae|g__Eubacterium|s__Eubacterium_siraeum	s__Eubacterium_siraeum	S	0.0120936	0.0325271	0	0	0.0009179	0.007496	0.480224	0.743711
k__Bacteria|p__Firmicutes|c__Clostridia|o__Clostridiales|f__Lachnospiraceae|g__Coprococcus|s__Coprococcus_comes	s__Coprococcus_comes	S	0.000599383	0.00124966	0	0	0.0002156	0.0006547	0.0261591	0.739215
k__Bacteria|p__Bacteroidetes|c__Bacteroidia|o__Bacteroidales|f__Bacteroidaceae|g__Bacteroides|s__Bacteroides_caccae	s__Bacteroides_caccae	S	0.00654815	0.0129718	0	0	0.002685	0.0078629	0.41348	0.733017
k__Bacteria|p__Proteobacteria|c__Deltaproteobacteria|o__Desulfovibrionales|f__Desulfovibrionaceae|g__Bilophila|s__Bilophila_wadsworthia	s__Bilophila_wadsworthia	S	0.000955079	0.0017454	0	0	0.0003411	0.0012137	0.0347383	0.721351
k__Bacteria|p__Proteobacteria|c__Betaproteobacteria|o__Burkholderiales|f__Sutterellaceae|g__Sutterella|s__Sutterella_wadsworthensis	s__Sutterella_wadsworthensis	S	0.0444052	0.0681603	0	0	0.0073807	0.0689325	0.626725	0.719164
k__Bacteria|p__Bacteroidetes|c__Bacteroidia|o__Bacteroidales|f__Bacteroidaceae|g__Bacteroides|s__Bacteroides_xylanisolvens	s__Bacteroides_xylanisolvens	S	0.00137443	0.00625974	0	0	0.000215	0.0009592	0.279737	0.700936
k__Bacteria|p__Bacteroidetes|c__Bacteroidia|o__Bacteroidales|f__Rikenellaceae|g__Alistipes|s__Alistipes_indistinctus	s__Alistipes_indistinctus	S	0.00529578	0.0135108	0	0	0.0009851	0.0044387	0.331262	0.691579
k__Bacteria|p__Firmicutes|c__Clostridia|o__Clostridiales|f__Lachnospiraceae|g__Roseburia|s__Roseburia_intestinalis	s__Roseburia_intestinalis	S	0.00345726	0.00999626	0	0	0.000542	0.0030173	0.230432	0.686961
k__Bacteria|p__Bacteroidetes|c__Bacteroidia|o__Bacteroidales|f__Bacteroidaceae|g__Bacteroides|s__Bacteroides_stercoris	s__Bacteroides_stercoris	S	0.0186609	0.0511807	0	0	0.0001938	0.011407	0.620339	0.659983
k__Bacteria|p__Firmicutes|c__Clostridia|o__Clostridiales|f__Ruminococcaceae|g__Ruminococcus|s__Ruminococcus_bromii	s__Ruminococcus_bromii	S	0.00524873	0.0110855	0	0	0.001751	0.0062763	0.326214	0.654515
k__Bacteria|p__Proteobacteria|c__Gammaproteobacteria|o__Enterobacteriales|f__Enterobacteriaceae|g__Escherichia|s__Escherichia_unclassified	s__Escherichia_unclassified	S	0.00441576	0.0230518	0	0	0.0001854	0.0008935	0.450313	0.642241
k__Bacteria|p__Firmicutes|c__Clostridia|o__Clostridiales|f__Lachnospiraceae|g__Coprococcus|s__Coprococcus_catus	s__Coprococcus_catus	S	0.000213953	0.000447706	0	0	5.85e-05	0.000252	0.0124521	0.612954
k__Bacteria|p__Firmicutes|c__Clostridia|o__Clostridiales|f__Lachnospiraceae|g__Blautia|s__Ruminococcus_torques	s__Ruminococcus_torques	S	0.000702604	0.00172016	0	0	0.0002646	0.000774	0.0401813	0.566533
k__Bacteria|p__Firmicutes|c__Clostridia|o__Clostridiales|f__Ruminococcaceae|g__Ruminococcus|s__Ruminococcus_lactaris	s__Ruminococcus_lactaris	S	0.00105234	0.00270061	0	0	6.68e-05	0.000981	0.0484996	0.531535
k__Bacteria|p__Firmicutes|c__Clostridia|o__Clostridiales|f__Lachnospiraceae|g__Dorea|s__Dorea_formicigenerans	s__Dorea_formicigenerans	S	0.00018385	0.000538239	0	0	1.6e-05	0.0001778	0.0166733	0.531292
k__Bacteria|p__Proteobacteria|c__Betaproteobacteria|o__Burkholderiales|f__Sutterellaceae|g__Parasutterella|s__Parasutterella_excrementihominis	s__Parasutterella_excrementihominis	S	0.000538382	0.0016738	0	0	1.54e-05	0.0002683	0.0321051	0.525823
k__Bacteria|p__Proteobacteria|c__Gammaproteobacteria|o__Enterobacteriales|f__Enterobacteriaceae|g__Escherichia|s__Escherichia_coli	s__Escherichia_coli	S	0.00628242	0.0328635	0	0	6.66e-05	0.0009345	0.582397	0.520841
k__Bacteria|p__Bacteroidetes|c__Bacteroidia|o__Bacteroidales|f__Prevotellaceae|g__Paraprevotella|s__Paraprevotella_unclassified	s__Paraprevotella_unclassified	S	0.00854136	0.0158221	0	0	2.33e-05	0.0121541	0.290565	0.509904
k__Bacteria|p__Bacteroidetes|c__Bacteroidia|o__Bacteroidales|f__Porphyromonadaceae|g__Parabacteroides|s__Parabacteroides_unclassified	s__Parabacteroides_unclassified	S	0.00656411	0.0162682	0	0	4.33e-05	0.0068488	0.39808	0.501884
k__Bacteria|p__Bacteroidetes|c__Bacteroidia|o__Bacteroidales|f__Porphyromonadaceae|g__Coprobacter|s__Coprobacter_fastidiosus	s__Coprobacter_fastidiosus	S	0.000424411	0.00128379	0	0	0	0.0003588	0.0459036	0.484141
k__Bacteria|p__Firmicutes|c__Clostridia|o__Clostridiales|f__Eubacteriaceae|g__Eubacterium|s__Eubacterium_hallii	s__Eubacterium_hallii	S	0.000150319	0.000448151	0	0	0	0.0001524	0.0196919	0.478916
k__Bacteria|p__Firmicutes|c__Clostridia|o__Clostridiales|f__Eubacteriaceae|g__Eubacterium|s__Eubacterium_ramulus	s__Eubacterium_ramulus	S	0.000224916	0.000823538	0	0	0	0.0001795	0.0245075	0.465913
k__Bacteria|p__Bacteroidetes|c__Bacteroidia|o__Bacteroidales|f__Prevotellaceae|g__Paraprevotella|s__Paraprevotella_clara	s__Paraprevotella_clara	S	0.00236365	0.00470261	0	0	0	0.0033395	0.129151	0.458865
k__Bacteria|p__Bacteroidetes|c__Bacteroidia|o__Bacteroidales|f__Bacteroidaceae|g__Bacteroides|s__Bacteroides_cellulosilyticus	s__Bacteroides_cellulosilyticus	S	0.00600595	0.0203504	0	0	0	0.0024292	0.477175	0.455705
k__Bacteria|p__Actinobacteria|c__Actinobacteria|o__Coriobacteriales|f__Coriobacteriaceae|g__Adlercreutzia|s__Adlercreutzia_equolifaciens	s__Adlercreutzia_equolifaciens	S	0.000265558	0.000842259	0	0	0	0.0002202	0.0379789	0.450115
k__Bacteria|p__Firmicutes|c__Clostridia|o__Clostridiales|f__Clostridiales_noname|g__Pseudoflavonifractor|s__Pseudoflavonifractor_capillosus	s__Pseudoflavonifractor_capillosus	S	0.000167123	0.000677948	0	0	0	0.0001651	0.0476163	0.448414
k__Bacteria|p__Bacteroidetes|c__Bacteroidia|o__Bacteroidales|f__Bacteroidaceae|g__Bacteroides|s__Bacteroides_massiliensis	s__Bacteroides_massiliensis	S	0.00985944	0.0257293	0	0	0	0.0076105	0.461934	0.441974
k__Bacteria|p__Proteobacteria|c__Betaproteobacteria|o__Burkholderiales|f__Burkholderiales_noname|g__Burkholderiales_noname|s__Burkholderiales_bacterium_1_1_47	s__Burkholderiales_bacterium_1_1_47	S	0.000591295	0.00212612	0	0	0	0.0001906	0.0750831	0.423988
k__Bacteria|p__Bacteroidetes|c__Bacteroidia|o__Bacteroidales|f__Bacteroidaceae|g__Bacteroides|s__Bacteroides_fragilis	s__Bacteroides_fragilis	S	0.00303542	0.0151058	0	0	0	0.0012388	0.796634	0.40892
k__Bacteria|p__Firmicutes|c__Clostridia|o__Clostridiales|f__Lachnospiraceae|g__Lachnospiraceae_noname|s__Lachnospiraceae_bacterium_3_1_46FAA	s__Lachnospiraceae_bacterium_3_1_46FAA	S	0.0004656	0.00187123	0	0	0	0.0002402	0.0533589	0.39774
k__Bacteria|p__Firmicutes|c__Negativicutes|o__Selenomonadales|f__Veillonellaceae|g__Dialister|s__Dialister_invisus	s__Dialister_invisus	S	0.005348	0.0157384	0	0	0	0.0050272	0.547486	0.394823
k__Bacteria|p__Bacteroidetes|c__Bacteroidia|o__Bacteroidales|f__Rikenellaceae|g__Alistipes|s__Alistipes_sp_AP11	s__Alistipes_sp_AP11	S	0.00780632	0.0170969	0	0	0	0.0096498	0.28135	0.388747
k__Bacteria|p__Firmicutes|c__Clostridia|o__Clostridiales|f__Lachnospiraceae|g__Roseburia|s__Roseburia_unclassified	s__Roseburia_unclassified	S	0.00121096	0.00398453	0	0	0	0.0007439	0.114268	0.378418
k__Bacteria|p__Firmicutes|c__Clostridia|o__Clostridiales|f__Ruminococcaceae|g__Ruminococcus|s__Ruminococcus_callidus	s__Ruminococcus_callidus	S	0.000688171	0.00236791	0	0	0	0.0002592	0.0659697	0.36663
k__Bacteria|p__Proteobacteria|c__Betaproteobacteria|o__Burkholderiales|f__Oxalobacteraceae|g__Oxalobacter|s__Oxalobacter_formigenes	s__Oxalobacter_formigenes	S	0.000291266	0.00126327	0	0	0	0.0001402	0.0374903	0.361283
k__Bacteria|p__Bacteroidetes|c__Bacteroidia|o__Bacteroidales|f__Bacteroidaceae|g__Bacteroides|s__Bacteroides_eggerthii	s__Bacteroides_eggerthii	S	0.00833767	0.0321302	0	0	0	0.0008387	0.61297	0.353263
k__Bacteria|p__Firmicutes|c__Clostridia|o__Clostridiales|f__Eubacteriaceae|g__Eubacterium|s__Eubacterium_ventriosum	s__Eubacterium_ventriosum	S	0.000152202	0.00059009	0	0	0	8.11e-05	0.0200908	0.340139
k__Bacteria|p__Proteobacteria|c__Deltaproteobacteria|o__Desulfovibrionales|f__Desulfovibrionaceae|g__Desulfovibrio|s__Desulfovibrio_piger	s__Desulfovibrio_piger	S	0.00404936	0.00855831	0	0	0	0.0051298	0.131274	0.338437
k__Bacteria|p__Firmicutes|c__Clostridia|o__Clostridiales|f__Clostridiales_noname|g__Flavonifractor|s__Flavonifractor_plautii	s__Flavonifractor_plautii	S	0.000161317	0.000977487	0	0	0	6.25e-05	0.0542157	0.335764
k__Bacteria|p__Bacteroidetes|c__Bacteroidia|o__Bacteroidales|f__Prevotellaceae|g__Paraprevotella|s__Paraprevotella_xylaniphila	s__Paraprevotella_xylaniphila	S	0.000329475	0.0020526	0	0	0	0.0001005	0.0593081	0.331024
k__Bacteria|p__Firmicutes|c__Clostridia|o__Clostridiales|f__Clostridiaceae|g__Clostridium|s__Clostridium_leptum	s__Clostridium_leptum	S	0.000278834	0.00215522	0	0	0	6.72e-05	0.124782	0.325921
k__Bacteria|p__Firmicutes|c__Negativicutes|o__Selenomonadales|f__Veillonellaceae|g__Veillonella|s__Veillonella_unclassified	s__Veillonella_unclassified	S	0.000139572	0.000746996	0	0	0	6.06e-05	0.0398238	0.325799
k__Bacteria|p__Proteobacteria|c__Gammaproteobacteria|o__Pasteurellales|f__Pasteurellaceae|g__Haemophilus|s__Haemophilus_parainfluenzae	s__Haemophilus_parainfluenzae	S	0.000588503	0.00439622	0	0	0	0.0001333	0.320107	0.3179
k__Bacteria|p__Firmicutes|c__Erysipelotrichia|o__Erysipelotrichales|f__Erysipelotrichaceae|g__Holdemania|s__Holdemania_unclassified	s__Holdemania_unclassified	S	4.60249e-05	0.000146473	0	0	0	2.75e-05	0.0042626	0.314376
k__Bacteria|p__Firmicutes|c__Clostridia|o__Clostridiales|f__Lachnospiraceae|g__Dorea|s__Dorea_unclassified	s__Dorea_unclassified	S	0.00010016	0.000445033	0	0	0	5.16e-05	0.0145817	0.295419
k__Bacteria|p__Firmicutes|c__Erysipelotrichia|o__Erysipelotrichales|f__Erysipelotrichaceae|g__Holdemania|s__Holdemania_filiformis	s__Holdemania_filiformis	S	7.01515e-05	0.000214186	0	0	0	3.5e-05	0.0047247	0.292745
k__Bacteria|p__Firmicutes|c__Negativicutes|o__Selenomonadales|f__Acidaminococcaceae|g__Phascolarctobacterium|s__Phascolarctobacterium_succinatutens	s__Phascolarctobacterium_succinatutens	S	0.00837929	0.019922	0	0	0	0.0053225	0.309916	0.284846
k__Bacteria|p__Firmicutes|c__Erysipelotrichia|o__Erysipelotrichales|f__Erysipelotrichaceae|g__Erysipelotrichaceae_noname|s__Eubacterium_biforme	s__Eubacterium_biforme	S	0.000275186	0.00131478	0	0	0	2.78e-05	0.0367662	0.266497
k__Bacteria|p__Actinobacteria|c__Actinobacteria|o__Bifidobacteriales|f__Bifidobacteriaceae|g__Bifidobacterium|s__Bifidobacterium_bifidum	s__Bifidobacterium_bifidum	S	0.00168103	0.00498741	0	0	0	0.0002364	0.0980691	0.266253
k__Bacteria|p__Firmicutes|c__Bacilli|o__Lactobacillales|f__Streptococcaceae|g__Streptococcus|s__Streptococcus_thermophilus	s__Streptococcus_thermophilus	S	0.00030912	0.00171866	0	0	0	2.78e-05	0.0554315	0.264795
k__Bacteria|p__Firmicutes|c__Clostridia|o__Clostridiales|f__Lachnospiraceae|g__Lachnospiraceae_noname|s__Lachnospiraceae_bacterium_8_1_57FAA	s__Lachnospiraceae_bacterium_8_1_57FAA	S	0.00019028	0.000792862	0	0	0	0	0.0280045	0.246324
k__Bacteria|p__Actinobacteria|c__Actinobacteria|o__Coriobacteriales|f__Coriobacteriaceae|g__Eggerthella|s__Eggerthella_unclassified	s__Eggerthella_unclassified	S	0.000166309	0.000860681	0	0	0	0	0.037753	0.244015
k__Bacteria|p__Actinobacteria|c__Actinobacteria|o__Actinomycetales|f__Micrococcaceae|g__Rothia|s__Rothia_mucilaginosa	s__Rothia_mucilaginosa	S	9.60873e-05	0.00056908	0	0	0	0	0.0337354	0.243529
k__Bacteria|p__Bacteroidetes|c__Bacteroidia|o__Bacteroidales|f__Bacteroidaceae|g__Bacteroides|s__Bacteroides_finegoldii	s__Bacteroides_finegoldii	S	0.00137685	0.00627301	0	0	0	0	0.178871	0.238911
k__Bacteria|p__Bacteroidetes|c__Bacteroidia|o__Bacteroidales|f__Bacteroidaceae|g__Bacteroides|s__Bacteroides_plebeius	s__Bacteroides_plebeius	S	0.00736824	0.0337034	0	0	0	0	0.769236	0.228703
k__Bacteria|p__Bacteroidetes|c__Bacteroidia|o__Bacteroidales|f__Bacteroidaceae|g__Bacteroides|s__Bacteroides_clarus	s__Bacteroides_clarus	S	0.0011323	0.0052657	0	0	0	0	0.153576	0.228217
k__Viruses|p__Viruses_noname|c__Viruses_noname|o__Caudovirales|f__Siphoviridae|g__C2likevirus|s__C2likevirus_unclassified	s__C2likevirus_unclassified	S	0.00144031	0.0123151	0	0	0	0	0.473541	0.224936
k__Bacteria|p__Firmicutes|c__Bacilli|o__Lactobacillales|f__Streptococcaceae|g__Streptococcus|s__Streptococcus_salivarius	s__Streptococcus_salivarius	S	0.000126622	0.000685067	0	0	0	0	0.0236423	0.219954
k__Bacteria|p__Bacteroidetes|c__Bacteroidia|o__Bacteroidales|f__Bacteroidaceae|g__Bacteroides|s__Bacteroides_intestinalis	s__Bacteroides_intestinalis	S	0.00163114	0.0110338	0	0	0	0	0.711158	0.209381
k__Bacteria|p__Bacteroidetes|c__Bacteroidia|o__Bacteroidales|f__Porphyromonadaceae|g__Parabacteroides|s__Parabacteroides_goldsteinii	s__Parabacteroides_goldsteinii	S	0.000483727	0.00275837	0	0	0	0	0.108966	0.207559
k__Bacteria|p__Firmicutes|c__Bacilli|o__Lactobacillales|f__Streptococcaceae|g__Streptococcus|s__Streptococcus_parasanguinis	s__Streptococcus_parasanguinis	S	0.000146881	0.000901023	0	0	0	0	0.0342265	0.20525
k__Bacteria|p__Bacteroidetes|c__Bacteroidia|o__Bacteroidales|f__Bacteroidaceae|g__Bacteroides|s__Bacteroides_coprocola	s__Bacteroides_coprocola	S	0.00499749	0.0251167	0	0	0	0	0.528988	0.203062
k__Bacteria|p__Firmicutes|c__Clostridia|o__Clostridiales|f__Ruminococcaceae|g__Ruminococcaceae_noname|s__Ruminococcaceae_bacterium_D16	s__Ruminococcaceae_bacterium_D16	S	0.000134205	0.00094973	0	0	0	0	0.0512773	0.201604
k__Bacteria|p__Bacteroidetes|c__Bacteroidia|o__Bacteroidales|f__Bacteroidaceae|g__Bacteroides|s__Bacteroides_faecis	s__Bacteroides_faecis	S	0.000853441	0.00446318	0	0	0	0	0.124507	0.197715
k__Bacteria|p__Bacteroidetes|c__Bacteroidia|o__Bacteroidales|f__Porphyromonadaceae|g__Parabacteroides|s__Parabacteroides_johnsonii	s__Parabacteroides_johnsonii	S	0.000845287	0.00527973	0	0	0	0	0.289175	0.19091
k__Bacteria|p__Bacteroidetes|c__Bacteroidia|o__Bacteroidales|f__Bacteroidaceae|g__Bacteroides|s__Bacteroides_salyersiae	s__Bacteroides_salyersiae	S	0.00115152	0.00492742	0	0	0	0	0.0909917	0.184227
k__Bacteria|p__Firmicutes|c__Clostridia|o__Clostridiales|f__Lachnospiraceae|g__Butyrivibrio|s__Butyrivibrio_crossotus	s__Butyrivibrio_crossotus	S	0.00995698	0.0428434	0	0	0	0	0.7194	0.182404
k__Bacteria|p__Firmicutes|c__Clostridia|o__Clostridiales|f__Clostridiaceae|g__Clostridium|s__Clostridium_asparagiforme	s__Clostridium_asparagiforme	S	8.72851e-05	0.000612415	0	0	0	0	0.0225971	0.171588
k__Bacteria|p__Firmicutes|c__Clostridia|o__Clostridiales|f__Lachnospiraceae|g__Lachnospiraceae_noname|s__Lachnospiraceae_bacterium_1_1_57FAA	s__Lachnospiraceae_bacterium_1_1_57FAA	S	0.000192007	0.00252301	0	0	0	0	0.132895	0.168307
k__Bacteria|p__Firmicutes|c__Bacilli|o__Lactobacillales|f__Lactobacillaceae|g__Lactobacillus|s__Lactobacillus_delbrueckii	s__Lactobacillus_delbrueckii	S	0.000422687	0.00334835	0	0	0	0	0.165404	0.159072
k__Bacteria|p__Actinobacteria|c__Actinobacteria|o__Coriobacteriales|f__Coriobacteriaceae|g__Gordonibacter|s__Gordonibacter_pamelaeae	s__Gordonibacter_pamelaeae	S	4.32005e-05	0.000216116	0	0	0	0	0.0066429	0.151051
k__Bacteria|p__Actinobacteria|c__Actinobacteria|o__Bifidobacteriales|f__Bifidobacteriaceae|g__Bifidobacterium|s__Bifidobacterium_catenulatum	s__Bifidobacterium_catenulatum	S	0.000209325	0.00123491	0	0	0	0	0.0511813	0.149714
k__Bacteria|p__Firmicutes|c__Clostridia|o__Clostridiales|f__Lachnospiraceae|g__Lachnospiraceae_noname|s__Lachnospiraceae_bacterium_5_1_63FAA	s__Lachnospiraceae_bacterium_5_1_63FAA	S	3.20689e-05	0.000176543	0	0	0	0	0.0057576	0.144489
k__Bacteria|p__Firmicutes|c__Clostridia|o__Clostridiales|f__Lachnospiraceae|g__Coprococcus|s__Coprococcus_sp_ART55_1	s__Coprococcus_sp_ART55_1	S	0.00178261	0.006786	0	0	0	0	0.213617	0.139993
k__Bacteria|p__Bacteroidetes|c__Bacteroidia|o__Bacteroidales|f__Bacteroidaceae|g__Bacteroides|s__Bacteroides_nordii	s__Bacteroides_nordii	S	8.20252e-05	0.00059226	0	0	0	0	0.0263928	0.130514
k__Bacteria|p__Firmicutes|c__Clostridia|o__Clostridiales|f__Ruminococcaceae|g__Anaerotruncus|s__Anaerotruncus_colihominis	s__Anaerotruncus_colihominis	S	3.40547e-05	0.00024132	0	0	0	0	0.0145563	0.128448
k__Bacteria|p__Firmicutes|c__Negativicutes|o__Selenomonadales|f__Veillonellaceae|g__Veillonella|s__Veillonella_parvula	s__Veillonella_parvula	S	6.28903e-05	0.000519308	0	0	0	0	0.0283344	0.127719
k__Bacteria|p__Bacteroidetes|c__Bacteroidia|o__Bacteroidales|f__Rikenellaceae|g__Alistipes|s__Alistipes_unclassified	s__Alistipes_unclassified	S	0.00847363	0.0400151	0	0	0	0	0.781205	0.124073
k__Bacteria|p__Bacteroidetes|c__Bacteroidia|o__Bacteroidales|f__Porphyromonadaceae|g__Odoribacter|s__Odoribacter_unclassified	s__Odoribacter_unclassified	S	7.80795e-05	0.000440532	0	0	0	0	0.0236061	0.116661
k__Viruses|p__Viruses_noname|c__Viruses_noname|o__Caudovirales|f__Siphoviridae|g__Siphoviridae_noname|s__Lactococcus_phage_P680	s__Lactococcus_phage_P680	S	0.00200334	0.0121815	0	0	0	0	0.362314	0.115324
k__Bacteria|p__Firmicutes|c__Clostridia|o__Clostridiales|f__Ruminococcaceae|g__Anaerotruncus|s__Anaerotruncus_unclassified	s__Anaerotruncus_unclassified	S	4.88112e-05	0.000229826	0	0	0	0	0.0077441	0.107668
k__Bacteria|p__Firmicutes|c__Negativicutes|o__Selenomonadales|f__Veillonellaceae|g__Mitsuokella|s__Mitsuokella_unclassified	s__Mitsuokella_unclassified	S	0.000487956	0.00316891	0	0	0	0	0.131011	0.105967
k__Bacteria|p__Proteobacteria|c__Deltaproteobacteria|o__Desulfovibrionales|f__Desulfovibrionaceae|g__Desulfovibrio|s__Desulfovibrio_desulfuricans	s__Desulfovibrio_desulfuricans	S	0.000142214	0.000952677	0	0	0	0	0.0354704	0.104265
k__Bacteria|p__Firmicutes|c__Clostridia|o__Clostridiales|f__Lachnospiraceae|g__Blautia|s__Ruminococcus_gnavus	s__Ruminococcus_gnavus	S	0.000203179	0.00245233	0	0	0	0	0.125169	0.100255
k__Bacteria|p__Bacteroidetes|c__Bacteroidia|o__Bacteroidales|f__Bacteroidaceae|g__Bacteroides|s__Bacteroides_coprophilus	s__Bacteroides_coprophilus	S	0.00343997	0.0167079	0	0	0	0	0.371091	0.0981893
k__Bacteria|p__Firmicutes|c__Clostridia|o__Clostridiales|f__Clostridiaceae|g__Clostridium|s__Clostridium_bolteae	s__Clostridium_bolteae	S	6.25757e-05	0.000782424	0	0	0	0	0.0352311	0.0973387
k__Bacteria|p__Firmicutes|c__Negativicutes|o__Selenomonadales|f__Veillonellaceae|g__Mitsuokella|s__Mitsuokella_multacida	s__Mitsuokella_multacida	S	0.000410759	0.00476639	0	0	0	0	0.281497	0.0970956
k__Bacteria|p__Firmicutes|c__Clostridia|o__Clostridiales|f__Lachnospiraceae|g__Anaerostipes|s__Anaerostipes_hadrus	s__Anaerostipes_hadrus	S	2.35476e-05	0.000156361	0	0	0	0	0.006526	0.0958804
k__Bacteria|p__Firmicutes|c__Erysipelotrichia|o__Erysipelotrichales|f__Erysipelotrichaceae|g__Catenibacterium|s__Catenibacterium_mitsuokai	s__Catenibacterium_mitsuokai	S	0.000101078	0.000810773	0	0	0	0	0.0331785	0.0945437
k__Bacteria|p__Bacteroidetes|c__Bacteroidia|o__Bacteroidales|f__Prevotellaceae|g__Prevotella|s__Prevotella_stercorea	s__Prevotella_stercorea	S	0.00509837	0.0346411	0	0	0	0	0.677072	0.0889537
k__Bacteria|p__Actinobacteria|c__Actinobacteria|o__Coriobacteriales|f__Coriobacteriaceae|g__Eggerthella|s__Eggerthella_lenta	s__Eggerthella_lenta	S	1.41392e-05	0.000112182	0	0	0	0	0.0049912	0.0857941
k__Bacteria|p__Actinobacteria|c__Actinobacteria|o__Bifidobacteriales|f__Bifidobacteriaceae|g__Bifidobacterium|s__Bifidobacterium_pseudocatenulatum	s__Bifidobacterium_pseudocatenulatum	S	0.000131249	0.000968441	0	0	0	0	0.0309717	0.085065
k__Bacteria|p__Firmicutes|c__Erysipelotrichia|o__Erysipelotrichales|f__Erysipelotrichaceae|g__Erysipelotrichaceae_noname|s__Erysipelotrichaceae_bacterium_21_3	s__Erysipelotrichaceae_bacterium_21_3	S	1.58875e-05	0.000178613	0	0	0	0	0.0100069	0.0839713
k__Bacteria|p__Firmicutes|c__Clostridia|o__Clostridiales|f__Peptostreptococcaceae|g__Peptostreptococcaceae_noname|s__Peptostreptococcaceae_noname_unclassified	s__Peptostreptococcaceae_noname_unclassified	S	5.34625e-05	0.000244263	0	0	0	0	0.0057776	0.0829991
k__Bacteria|p__Firmicutes|c__Clostridia|o__Clostridiales|f__Clostridiaceae|g__Clostridium|s__Clostridium_hathewayi	s__Clostridium_hathewayi	S	5.10535e-05	0.000660196	0	0	0	0	0.0375005	0.0757079
k__Bacteria|p__Firmicutes|c__Clostridia|o__Clostridiales|f__Peptostreptococcaceae|g__Peptostreptococcaceae_noname|s__Clostridium_bartlettii	s__Clostridium_bartlettii	S	2.95714e-05	0.000541755	0	0	0	0	0.0387581	0.0685381
k__Bacteria|p__Firmicutes|c__Negativicutes|o__Selenomonadales|f__Veillonellaceae|g__Veillonella|s__Veillonella_atypica	s__Veillonella_atypica	S	4.05833e-05	0.000481771	0	0	0	0	0.0308586	0.0682951
k__Archaea|p__Euryarchaeota|c__Methanobacteria|o__Methanobacteriales|f__Methanobacteriaceae|g__Methanobrevibacter|s__Methanobrevibacter_smithii	s__Methanobrevibacter_smithii	S	4.1132e-05	0.00109425	0	0	0	0	0.0888851	0.0663507
k__Viruses|p__Viruses_noname|c__Viruses_noname|o__Viruses_noname|f__Retroviridae|g__Gammaretrovirus|s__Murine_osteosarcoma_virus	s__Murine_osteosarcoma_virus	S	0.000226087	0.00392053	0	0	0	0	0.291579	0.0636772
k__Bacteria|p__Firmicutes|c__Negativicutes|o__Selenomonadales|f__Acidaminococcaceae|g__Acidaminococcus|s__Acidaminococcus_unclassified	s__Acidaminococcus_unclassified	S	0.00129181	0.00993555	0	0	0	0	0.284364	0.0623405
k__Archaea|p__Euryarchaeota|c__Methanobacteria|o__Methanobacteriales|f__Methanobacteriaceae|g__Methanobrevibacter|s__Methanobrevibacter_unclassified	s__Methanobrevibacter_unclassified	S	1.09712e-05	6.82134e-05	0	0	0	0	0.0026139	0.0580873
k__Bacteria|p__Proteobacteria|c__Gammaproteobacteria|o__Enterobacteriales|f__Enterobacteriaceae|g__Klebsiella|s__Klebsiella_pneumoniae	s__Klebsiella_pneumoniae	S	0.00173244	0.0214308	0	0	0	0	0.700041	0.0543201
k__Bacteria|p__Firmicutes|c__Clostridia|o__Clostridiales|f__Clostridiaceae|g__Clostridium|s__Clostridium_citroniae	s__Clostridium_citroniae	S	9.77357e-06	0.000124587	0	0	0	0	0.0056491	0.0541986
k__Bacteria|p__Proteobacteria|c__Gammaproteobacteria|o__Enterobacteriales|f__Enterobacteriaceae|g__Klebsiella|s__Klebsiella_unclassified	s__Klebsiella_unclassified	S	0.000148027	0.00252394	0	0	0	0	0.135345	0.053834
k__Bacteria|p__Firmicutes|c__Negativicutes|o__Selenomonadales|f__Veillonellaceae|g__Megasphaera|s__Megasphaera_unclassified	s__Megasphaera_unclassified	S	0.000495199	0.00477498	0	0	0	0	0.249566	0.0529834
k__Bacteria|p__Firmicutes|c__Clostridia|o__Clostridiales|f__Lachnospiraceae|g__Coprococcus|s__Coprococcus_eutactus	s__Coprococcus_eutactus	S	0.000167865	0.00185066	0	0	0	0	0.0845797	0.0528618
k__Bacteria|p__Firmicutes|c__Clostridia|o__Clostridiales|f__Lachnospiraceae|g__Lachnospiraceae_noname|s__Lachnospiraceae_bacterium_3_1_57FAA_CT1	s__Lachnospiraceae_bacterium_3_1_57FAA_CT1	S	3.2971e-05	0.000412667	0	0	0	0	0.0183572	0.0521327
k__Bacteria|p__Actinobacteria|c__Actinobacteria|o__Bifidobacteriales|f__Bifidobacteriaceae|g__Bifidobacterium|s__Bifidobacterium_dentium	s__Bifidobacterium_dentium	S	6.36642e-05	0.000739263	0	0	0	0	0.0295326	0.0514036
k__Bacteria|p__Firmicutes|c__Negativicutes|o__Selenomonadales|f__Veillonellaceae|g__Megamonas|s__Megamonas_unclassified	s__Megamonas_unclassified	S	0.000123049	0.00100409	0	0	0	0	0.0278918	0.0497023
k__Bacteria|p__Firmicutes|c__Clostridia|o__Clostridiales|f__Clostridiaceae|g__Clostridium|s__Clostridium_symbiosum	s__Clostridium_symbiosum	S	2.91436e-05	0.000358434	0	0	0	0	0.0139258	0.0484871
k__Bacteria|p__Actinobacteria|c__Actinobacteria|o__Coriobacteriales|f__Coriobacteriaceae|g__Slackia|s__Slackia_piriformis	s__Slackia_piriformis	S	2.24145e-05	0.000212974	0	0	0	0	0.0098431	0.0481225
k__Bacteria|p__Actinobacteria|c__Actinobacteria|o__Coriobacteriales|f__Coriobacteriaceae|g__Coriobacteriaceae_noname|s__Coriobacteriaceae_bacterium_phI	s__Coriobacteriaceae_bacterium_phI	S	6.42245e-05	0.00082316	0	0	0	0	0.0479476	0.0478795
k__Bacteria|p__Firmicutes|c__Clostridia|o__Clostridiales|f__Ruminococcaceae|g__Ruminococcus|s__Ruminococcus_champanellensis	s__Ruminococcus_champanellensis	S	0.00057405	0.00510562	0	0	0	0	0.21977	0.0477579
k__Bacteria|p__Firmicutes|c__Negativicutes|o__Selenomonadales|f__Acidaminococcaceae|g__Acidaminococcus|s__Acidaminococcus_fermentans	s__Acidaminococcus_fermentans	S	0.000955823	0.00782731	0	0	0	0	0.177977	0.0471503
k__Bacteria|p__Actinobacteria|c__Actinobacteria|o__Bifidobacteriales|f__Bifidobacteriaceae|g__Bifidobacterium|s__Bifidobacterium_angulatum	s__Bifidobacterium_angulatum	S	0.000173441	0.00255844	0	0	0	0	0.20203	0.0422895
k__Bacteria|p__Firmicutes|c__Bacilli|o__Lactobacillales|f__Streptococcaceae|g__Lactococcus|s__Lactococcus_lactis	s__Lactococcus_lactis	S	3.21033e-05	0.000495818	0	0	0	0	0.0280382	0.0420464
k__Bacteria|p__Firmicutes|c__Clostridia|o__Clostridiales|f__Clostridiaceae|g__Clostridium|s__Clostridium_sp_L2_50	s__Clostridium_sp_L2_50	S	0.000608991	0.00407745	0	0	0	0	0.102258	0.0414388
k__Bacteria|p__Actinobacteria|c__Actinobacteria|o__Actinomycetales|f__Actinomycetaceae|g__Actinomyces|s__Actinomyces_odontolyticus	s__Actinomyces_odontolyticus	S	6.11213e-06	5.22377e-05	0	0	0	0	0.0017608	0.0411958
k__Bacteria|p__Firmicutes|c__Negativicutes|o__Selenomonadales|f__Veillonellaceae|g__Dialister|s__Dialister_succinatiphilus	s__Dialister_succinatiphilus	S	0.000533399	0.00429369	0	0	0	0	0.0971165	0.0404666
k__Bacteria|p__Firmicutes|c__Clostridia|o__Clostridiales|f__Clostridiales_noname|g__Clostridiales_noname|s__Bacteroides_pectinophilus	s__Bacteroides_pectinophilus	S	0.000312855	0.00330676	0	0	0	0	0.1778	0.0397375
k__Bacteria|p__Firmicutes|c__Negativicutes|o__Selenomonadales|f__Acidaminococcaceae|g__Acidaminococcus|s__Acidaminococcus_intestini	s__Acidaminococcus_intestini	S	5.40979e-05	0.000726106	0	0	0	0	0.0284389	0.0387653
k__Bacteria|p__Firmicutes|c__Negativicutes|o__Selenomonadales|f__Veillonellaceae|g__Megasphaera|s__Megasphaera_elsdenii	s__Megasphaera_elsdenii	S	0.000141007	0.00137738	0	0	0	0	0.0502846	0.0381577
k__Bacteria|p__Actinobacteria|c__Actinobacteria|o__Bifidobacteriales|f__Bifidobacteriaceae|g__Bifidobacterium|s__Bifidobacterium_animalis	s__Bifidobacterium_animalis	S	2.83911e-05	0.000321715	0	0	0	0	0.012494	0.0377932
k__Bacteria|p__Firmicutes|c__Negativicutes|o__Selenomonadales|f__Veillonellaceae|g__Veillonella|s__Veillonella_dispar	s__Veillonella_dispar	S	9.74335e-06	0.000105666	0	0	0	0	0.0041865	0.036578
k__Bacteria|p__Actinobacteria|c__Actinobacteria|o__Coriobacteriales|f__Coriobacteriaceae|g__Olsenella|s__Olsenella_unclassified	s__Olsenella_unclassified	S	5.75729e-06	0.000132957	0	0	0	0	0.0112023	0.0346336
k__Eukaryota|p__Ascomycota|c__Saccharomycetes|o__Saccharomycetales|f__Saccharomycetaceae|g__Saccharomyces|s__Saccharomyces_cerevisiae	s__Saccharomyces_cerevisiae	S	7.86336e-06	9.01416e-05	0	0	0	0	0.0051959	0.0325677
k__Bacteria|p__Firmicutes|c__Negativicutes|o__Selenomonadales|f__Veillonellaceae|g__Megamonas|s__Megamonas_hypermegale	s__Megamonas_hypermegale	S	5.00636e-05	0.000510122	0	0	0	0	0.0222162	0.0319601
k__Bacteria|p__Proteobacteria|c__Gammaproteobacteria|o__Enterobacteriales|f__Enterobacteriaceae|g__Enterobacter|s__Enterobacter_cloacae	s__Enterobacter_cloacae	S	0.000323358	0.00744765	0	0	0	0	0.390301	0.0318386
k__Bacteria|p__Actinobacteria|c__Actinobacteria|o__Coriobacteriales|f__Coriobacteriaceae|g__Collinsella|s__Collinsella_intestinalis	s__Collinsella_intestinalis	S	7.27067e-05	0.000973242	0	0	0	0	0.0517908	0.0307449
k__Bacteria|p__Firmicutes|c__Clostridia|o__Clostridiales|f__Lachnospiraceae|g__Lachnospiraceae_noname|s__Lachnospiraceae_bacterium_1_4_56FAA	s__Lachnospiraceae_bacterium_1_4_56FAA	S	7.49782e-06	9.51569e-05	0	0	0	0	0.0046907	0.0297728
k__Bacteria|p__Firmicutes|c__Clostridia|o__Clostridiales|f__Clostridiales_noname|g__Clostridiales_noname|s__Clostridiales_bacterium_1_7_47FAA	s__Clostridiales_bacterium_1_7_47FAA	S	7.22909e-06	0.000100726	0	0	0	0	0.0049415	0.0290436
k__Bacteria|p__Firmicutes|c__Clostridia|o__Clostridiales|f__Clostridiaceae|g__Clostridiaceae_noname|s__Clostridiaceae_bacterium_JC118	s__Clostridiaceae_bacterium_JC118	S	9.90509e-06	0.000160137	0	0	0	0	0.0104875	0.028436
k__Bacteria|p__Actinobacteria|c__Actinobacteria|o__Actinomycetales|f__Micrococcaceae|g__Rothia|s__Rothia_unclassified	s__Rothia_unclassified	S	3.31943e-06	2.9443e-05	0	0	0	0	0.000733	0.0278284
k__Bacteria|p__Bacteroidetes|c__Bacteroidia|o__Bacteroidales|f__Rikenellaceae|g__Alistipes|s__Alistipes_sp_HGB5	s__Alistipes_sp_HGB5	S	0.00109785	0.0103209	0	0	0	0	0.404433	0.0277069
k__Bacteria|p__Firmicutes|c__Clostridia|o__Clostridiales|f__Clostridiaceae|g__Clostridium|s__Clostridium_clostridioforme	s__Clostridium_clostridioforme	S	3.16004e-05	0.000590079	0	0	0	0	0.0284318	0.0277069
k__Bacteria|p__Firmicutes|c__Erysipelotrichia|o__Erysipelotrichales|f__Erysipelotrichaceae|g__Erysipelotrichaceae_noname|s__Eubacterium_cylindroides	s__Eubacterium_cylindroides	S	3.10942e-05	0.000863719	0	0	0	0	0.0706521	0.0277069
k__Bacteria|p__Proteobacteria|c__Gammaproteobacteria|o__Pseudomonadales|f__Pseudomonadaceae|g__Pseudomonas|s__Pseudomonas_aeruginosa	s__Pseudomonas_aeruginosa	S	8.57073e-05	0.00214506	0	0	0	0	0.116671	0.0275854
k__Bacteria|p__Firmicutes|c__Bacilli|o__Lactobacillales|f__Lactobacillaceae|g__Lactobacillus|s__Lactobacillus_ruminis	s__Lactobacillus_ruminis	S	4.00415e-05	0.000536839	0	0	0	0	0.0315103	0.0270993
k__Bacteria|p__Actinobacteria|c__Actinobacteria|o__Actinomycetales|f__Actinomycetaceae|g__Actinomyces|s__Actinomyces_graevenitzii	s__Actinomyces_graevenitzii	S	6.1e-06	8.3093e-05	0	0	0	0	0.0040384	0.0258841
k__Bacteria|p__Bacteroidetes|c__Bacteroidia|o__Bacteroidales|f__Porphyromonadaceae|g__Odoribacter|s__Odoribacter_laneus	s__Odoribacter_laneus	S	0.000499804	0.00636828	0	0	0	0	0.228434	0.0249119
k__Bacteria|p__Proteobacteria|c__Gammaproteobacteria|o__Pseudomonadales|f__Pseudomonadaceae|g__Pseudomonas|s__Pseudomonas_unclassified	s__Pseudomonas_unclassified	S	2.25952e-05	0.000257762	0	0	0	0	0.0128942	0.0246689
k__Bacteria|p__Actinobacteria|c__Actinobacteria|o__Coriobacteriales|f__Coriobacteriaceae|g__Collinsella|s__Collinsella_tanakaei	s__Collinsella_tanakaei	S	4.05075e-05	0.000778305	0	0	0	0	0.0511285	0.0238182
k__Bacteria|p__Firmicutes|c__Bacilli|o__Lactobacillales|f__Streptococcaceae|g__Streptococcus|s__Streptococcus_mitis_oralis_pneumoniae	s__Streptococcus_mitis_oralis_pneumoniae	S	5.67155e-06	7.40435e-05	0	0	0	0	0.0033611	0.0234536
k__Bacteria|p__Firmicutes|c__Clostridia|o__Clostridiales|f__Clostridiaceae|g__Clostridium|s__Clostridium_nexile	s__Clostridium_nexile	S	2.59707e-05	0.000500557	0	0	0	0	0.0292874	0.0230891
k__Bacteria|p__Firmicutes|c__Negativicutes|o__Selenomonadales|f__Veillonellaceae|g__Megamonas|s__Megamonas_rupellensis	s__Megamonas_rupellensis	S	7.14719e-06	8.91603e-05	0	0	0	0	0.0033131	0.0230891
k__Bacteria|p__Proteobacteria|c__Gammaproteobacteria|o__Enterobacteriales|f__Enterobacteriaceae|g__Klebsiella|s__Klebsiella_oxytoca	s__Klebsiella_oxytoca	S	0.00014565	0.00378184	0	0	0	0	0.282751	0.0215093
k__Bacteria|p__Proteobacteria|c__Gammaproteobacteria|o__Aeromonadales|f__Succinivibrionaceae|g__Succinatimonas|s__Succinatimonas_hippei	s__Succinatimonas_hippei	S	3.44176e-05	0.000728195	0	0	0	0	0.0574506	0.0212663
k__Bacteria|p__Proteobacteria|c__Gammaproteobacteria|o__Enterobacteriales|f__Enterobacteriaceae|g__Citrobacter|s__Citrobacter_unclassified	s__Citrobacter_unclassified	S	0.000124624	0.00460853	0	0	0	0	0.361777	0.0201726
k__Bacteria|p__Actinobacteria|c__Actinobacteria|o__Coriobacteriales|f__Coriobacteriaceae|g__Collinsella|s__Collinsella_unclassified	s__Collinsella_unclassified	S	2.71245e-05	0.00063824	0	0	0	0	0.0353088	0.0196865
k__Bacteria|p__Firmicutes|c__Erysipelotrichia|o__Erysipelotrichales|f__Erysipelotrichaceae|g__Turicibacter|s__Turicibacter_unclassified	s__Turicibacter_unclassified	S	4.71869e-06	5.42887e-05	0	0	0	0	0.0020103	0.0192004
k__Bacteria|p__Firmicutes|c__Erysipelotrichia|o__Erysipelotrichales|f__Erysipelotrichaceae|g__Erysipelotrichaceae_noname|s__Erysipelotrichaceae_bacterium_6_1_45	s__Erysipelotrichaceae_bacterium_6_1_45	S	1.17687e-06	2.12884e-05	0	0	0	0	0.0015214	0.0187143
k__Bacteria|p__Bacteroidetes|c__Bacteroidia|o__Bacteroidales|f__Bacteroidaceae|g__Bacteroides|s__Bacteroides_barnesiae	s__Bacteroides_barnesiae	S	0.000934767	0.0120857	0	0	0	0	0.527345	0.0184713
k__Viruses|p__Viruses_noname|c__Viruses_noname|o__Caudovirales|f__Podoviridae|g__Epsilon15likevirus|s__Epsilon15likevirus_unclassified	s__Epsilon15likevirus_unclassified	S	6.145e-06	9.37198e-05	0	0	0	0	0.0063276	0.0181067
k__Bacteria|p__Firmicutes|c__Erysipelotrichia|o__Erysipelotrichales|f__Erysipelotrichaceae|g__Coprobacillus|s__Coprobacillus_unclassified	s__Coprobacillus_unclassified	S	6.48869e-06	0.000101757	0	0	0	0	0.0049587	0.017256
k__Bacteria|p__Bacteroidetes|c__Bacteroidia|o__Bacteroidales|f__Bacteroidaceae|g__Bacteroides|s__Bacteroides_fluxus	s__Bacteroides_fluxus	S	0.00027544	0.0036263	0	0	0	0	0.124465	0.0162839
k__Bacteria|p__Proteobacteria|c__Gammaproteobacteria|o__Enterobacteriales|f__Enterobacteriaceae|g__Citrobacter|s__Citrobacter_freundii	s__Citrobacter_freundii	S	0.000135732	0.00475162	0	0	0	0	0.270062	0.0153117
k__Bacteria|p__Firmicutes|c__Bacilli|o__Lactobacillales|f__Streptococcaceae|g__Streptococcus|s__Streptococcus_australis	s__Streptococcus_australis	S	6.49106e-06	0.000224153	0	0	0	0	0.0192113	0.0151902
k__Bacteria|p__Bacteroidetes|c__Bacteroidia|o__Bacteroidales|f__Bacteroidaceae|g__Bacteroides|s__Bacteroides_salanitronis	s__Bacteroides_salanitronis	S	0.000302659	0.00535603	0	0	0	0	0.210049	0.0133674
k__Bacteria|p__Bacteroidetes|c__Bacteroidia|o__Bacteroidales|f__Porphyromonadaceae|g__Porphyromonas|s__Porphyromonas_asaccharolytica	s__Porphyromonas_asaccharolytica	S	3.89673e-06	0.000103118	0	0	0	0	0.0078141	0.0128813
k__Bacteria|p__Proteobacteria|c__Gammaproteobacteria|o__Pasteurellales|f__Pasteurellaceae|g__Haemophilus|s__Haemophilus_pittmaniae	s__Haemophilus_pittmaniae	S	1.76623e-05	0.000878426	0	0	0	0	0.0789429	0.0120306
k__Bacteria|p__Bacteroidetes|c__Bacteroidia|o__Bacteroidales|f__Porphyromonadaceae|g__Porphyromonas|s__Porphyromonas_bennonis	s__Porphyromonas_bennonis	S	3.93994e-06	7.46777e-05	0	0	0	0	0.0040569	0.0115445
k__Bacteria|p__Firmicutes|c__Negativicutes|o__Selenomonadales|f__Veillonellaceae|g__Megamonas|s__Megamonas_funiformis	s__Megamonas_funiformis	S	4.79587e-06	7.02376e-05	0	0	0	0	0.002608	0.011423
k__Bacteria|p__Firmicutes|c__Clostridia|o__Clostridiales|f__Lachnospiraceae|g__Lachnospiraceae_noname|s__Lachnospiraceae_bacterium_2_1_58FAA	s__Lachnospiraceae_bacterium_2_1_58FAA	S	6.486e-06	0.000164429	0	0	0	0	0.0086257	0.01118
k__Bacteria|p__Firmicutes|c__Bacilli|o__Lactobacillales|f__Lactobacillaceae|g__Lactobacillus|s__Lactobacillus_fermentum	s__Lactobacillus_fermentum	S	1.26836e-05	0.000294962	0	0	0	0	0.0164272	0.01118
k__Bacteria|p__Firmicutes|c__Erysipelotrichia|o__Erysipelotrichales|f__Erysipelotrichaceae|g__Turicibacter|s__Turicibacter_sanguinis	s__Turicibacter_sanguinis	S	3.60732e-06	6.46602e-05	0	0	0	0	0.0028483	0.0110585
k__Bacteria|p__Proteobacteria|c__Gammaproteobacteria|o__Pseudomonadales|f__Moraxellaceae|g__Acinetobacter|s__Acinetobacter_baumannii	s__Acinetobacter_baumannii	S	9.20962e-06	0.000236205	0	0	0	0	0.0173695	0.0106939
k__Bacteria|p__Firmicutes|c__Bacilli|o__Lactobacillales|f__Lactobacillaceae|g__Lactobacillus|s__Lactobacillus_rhamnosus	s__Lactobacillus_rhamnosus	S	1.99004e-05	0.000364473	0	0	0	0	0.0151744	0.0100863
k__Bacteria|p__Tenericutes|c__Mollicutes|o__Mycoplasmatales|f__Mycoplasmataceae|g__Mycoplasma|s__Mycoplasma_hyorhinis	s__Mycoplasma_hyorhinis	S	1.13314e-05	0.000173392	0	0	0	0	0.0052769	0.00972172
k__Bacteria|p__Firmicutes|c__Bacilli|o__Lactobacillales|f__Streptococcaceae|g__Streptococcus|s__Streptococcus_vestibularis	s__Streptococcus_vestibularis	S	2.21647e-06	5.68342e-05	0	0	0	0	0.0046335	0.00972172
k__Bacteria|p__Bacteroidetes|c__Bacteroidia|o__Bacteroidales|f__Porphyromonadaceae|g__Butyricimonas|s__Butyricimonas_synergistica	s__Butyricimonas_synergistica	S	8.14003e-06	0.000199461	0	0	0	0	0.0127137	0.00960019
k__Bacteria|p__Actinobacteria|c__Actinobacteria|o__Actinomycetales|f__Propionibacteriaceae|g__Propionibacterium|s__Propionibacterium_acnes	s__Propionibacterium_acnes	S	2.7137e-06	6.03623e-05	0	0	0	0	0.0029336	0.00947867
k__Bacteria|p__Firmicutes|c__Clostridia|o__Clostridiales|f__Lachnospiraceae|g__Stomatobaculum|s__Stomatobaculum_longum	s__Stomatobaculum_longum	S	1.98844e-06	3.76154e-05	0	0	0	0	0.0018574	0.00947867
k__Bacteria|p__Firmicutes|c__Bacilli|o__Lactobacillales|f__Streptococcaceae|g__Streptococcus|s__Streptococcus_sanguinis	s__Streptococcus_sanguinis	S	2.92181e-06	0.00012707	0	0	0	0	0.0112731	0.00947867
k__Bacteria|p__Actinobacteria|c__Actinobacteria|o__Coriobacteriales|f__Coriobacteriaceae|g__Collinsella|s__Collinsella_stercoris	s__Collinsella_stercoris	S	1.83968e-05	0.00063315	0	0	0	0	0.0522701	0.00935715
k__Bacteria|p__Firmicutes|c__Bacilli|o__Lactobacillales|f__Lactobacillaceae|g__Lactobacillus|s__Lactobacillus_mucosae	s__Lactobacillus_mucosae	S	4.90261e-06	8.57167e-05	0	0	0	0	0.0041017	0.00935715
k__Bacteria|p__Actinobacteria|c__Actinobacteria|o__Bifidobacteriales|f__Bifidobacteriaceae|g__Scardovia|s__Scardovia_wiggsiae	s__Scardovia_wiggsiae	S	2.11873e-06	3.89133e-05	0	0	0	0	0.0015349	0.00923563
k__Bacteria|p__Actinobacteria|c__Actinobacteria|o__Bifidobacteriales|f__Bifidobacteriaceae|g__Bifidobacterium|s__Bifidobacterium_breve	s__Bifidobacterium_breve	S	1.89245e-05	0.000649518	0	0	0	0	0.043923	0.00911411
k__Bacteria|p__Firmicutes|c__Clostridia|o__Clostridiales|f__Ruminococcaceae|g__Subdoligranulum|s__Subdoligranulum_sp_4_3_54A2FAA	s__Subdoligranulum_sp_4_3_54A2FAA	S	0.000111267	0.00151747	0	0	0	0	0.0484486	0.00874954
k__Viruses|p__Viruses_noname|c__Viruses_noname|o__Viruses_noname|f__Retroviridae|g__Gammaretrovirus|s__Porcine_type_C_oncovirus	s__Porcine_type_C_oncovirus	S	1.50831e-06	2.41777e-05	0	0	0	0	0.0015283	0.0085065
k__Bacteria|p__Firmicutes|c__Bacilli|o__Lactobacillales|f__Streptococcaceae|g__Lactococcus|s__Lactococcus_raffinolactis	s__Lactococcus_raffinolactis	S	6.27039e-06	0.00024797	0	0	0	0	0.0209501	0.00802042
k__Viruses|p__Viruses_noname|c__Viruses_noname|o__Viruses_noname|f__Hepadnaviridae|g__Orthohepadnavirus|s__Orthohepadnavirus_unclassified	s__Orthohepadnavirus_unclassified	S	8.34104e-06	0.000132359	0	0	0	0	0.005394	0.00802042
k__Bacteria|p__Firmicutes|c__Erysipelotrichia|o__Erysipelotrichales|f__Erysipelotrichaceae|g__Erysipelotrichaceae_noname|s__Erysipelotrichaceae_bacterium_2_2_44A	s__Erysipelotrichaceae_bacterium_2_2_44A	S	9.55444e-06	0.000687242	0	0	0	0	0.062108	0.00765585
k__Bacteria|p__Firmicutes|c__Clostridia|o__Clostridiales|f__Eubacteriaceae|g__Eubacterium|s__Eubacterium_sp_3_1_31	s__Eubacterium_sp_3_1_31	S	1.98784e-06	6.31246e-05	0	0	0	0	0.0053118	0.00753433
k__Bacteria|p__Proteobacteria|c__Alphaproteobacteria|o__Alphaproteobacteria_noname|f__Alphaproteobacteria_noname|g__Candidatus_Pelagibacter|s__Candidatus_Pelagibacter_unclassified	s__Candidatus_Pelagibacter_unclassified	S	1.77464e-06	4.33887e-05	0	0	0	0	0.0034938	0.00729129
k__Bacteria|p__Firmicutes|c__Clostridia|o__Clostridiales|f__Oscillospiraceae|g__Oscillibacter|s__Oscillibacter_sp_KLE_1745	s__Oscillibacter_sp_KLE_1745	S	4.87341e-05	0.000622205	0	0	0	0	0.0151752	0.00692672
k__Bacteria|p__Spirochaetes|c__Spirochaetia|o__Spirochaetales|f__Brachyspiraceae|g__Brachyspira|s__Brachyspira_unclassified	s__Brachyspira_unclassified	S	7.00061e-07	1.66132e-05	0	0	0	0	0.0010453	0.0068052
k__Bacteria|p__Bacteroidetes|c__Bacteroidia|o__Bacteroidales|f__Bacteroidaceae|g__Bacteroides|s__Bacteroides_sp_1_1_6	s__Bacteroides_sp_1_1_6	S	9.16393e-05	0.00181344	0	0	0	0	0.101961	0.00631912
k__Bacteria|p__Actinobacteria|c__Actinobacteria|o__Actinomycetales|f__Micrococcaceae|g__Rothia|s__Rothia_dentocariosa	s__Rothia_dentocariosa	S	1.06819e-06	2.70156e-05	0	0	0	0	0.001595	0.00631912
k__Bacteria|p__Firmicutes|c__Bacilli|o__Lactobacillales|f__Streptococcaceae|g__Streptococcus|s__Streptococcus_infantis	s__Streptococcus_infantis	S	8.29505e-07	1.56124e-05	0	0	0	0	0.0006064	0.00607607
k__Viruses|p__Viruses_noname|c__Viruses_noname|o__Viruses_noname|f__Endornaviridae|g__Endornavirus|s__Oryza_sativa_endornavirus	s__Oryza_sativa_endornavirus	S	3.15655e-05	0.000634002	0	0	0	0	0.0231089	0.00595455
k__Bacteria|p__Proteobacteria|c__Gammaproteobacteria|o__Enterobacteriales|f__Enterobacteriaceae|g__Raoultella|s__Raoultella_ornithinolytica	s__Raoultella_ornithinolytica	S	6.46604e-05	0.00412082	0	0	0	0	0.368565	0.00595455
k__Bacteria|p__Firmicutes|c__Bacilli|o__Bacillales|f__Staphylococcaceae|g__Staphylococcus|s__Staphylococcus_pseudintermedius	s__Staphylococcus_pseudintermedius	S	2.43772e-06	3.92992e-05	0	0	0	0	0.0015462	0.00583303
k__Bacteria|p__Actinobacteria|c__Actinobacteria|o__Actinomycetales|f__Propionibacteriaceae|g__Propionibacterium|s__Propionibacterium_freudenreichii	s__Propionibacterium_freudenreichii	S	3.06957e-06	7.12811e-05	0	0	0	0	0.0034996	0.00571151
k__Bacteria|p__Proteobacteria|c__Gammaproteobacteria|o__Pasteurellales|f__Pasteurellaceae|g__Pasteurella|s__Pasteurella_multocida	s__Pasteurella_multocida	S	1.15496e-05	0.000937317	0	0	0	0	0.0849894	0.00558999
k__Bacteria|p__Firmicutes|c__Clostridia|o__Clostridiales|f__Clostridiaceae|g__Butyricicoccus|s__Butyricicoccus_pullicaecorum	s__Butyricicoccus_pullicaecorum	S	6.62495e-06	0.000386487	0	0	0	0	0.034508	0.00534694
k__Bacteria|p__Bacteroidetes|c__Bacteroidia|o__Bacteroidales|f__Bacteroidaceae|g__Bacteroides|s__Bacteroides_oleiciplenus	s__Bacteroides_oleiciplenus	S	6.33273e-07	2.03353e-05	0	0	0	0	0.0013417	0.00522542
k__Bacteria|p__Actinobacteria|c__Actinobacteria|o__Coriobacteriales|f__Coriobacteriaceae|g__Enterorhabdus|s__Enterorhabdus_caecimuris	s__Enterorhabdus_caecimuris	S	3.84421e-06	0.000156634	0	0	0	0	0.0132006	0.00522542
k__Bacteria|p__Proteobacteria|c__Betaproteobacteria|o__Burkholderiales|f__Burkholderiaceae|g__Lautropia|s__Lautropia_mirabilis	s__Lautropia_mirabilis	S	1.13361e-06	3.90754e-05	0	0	0	0	0.003265	0.00522542
k__Viruses|p__Viruses_noname|c__Viruses_noname|o__Caudovirales|f__Siphoviridae|g__Siphoviridae_noname|s__Lactococcus_phage_phi7	s__Lactococcus_phage_phi7	S	0.000148075	0.00313699	0	0	0	0	0.174077	0.0051039
k__Bacteria|p__Actinobacteria|c__Actinobacteria|o__Bifidobacteriales|f__Bifidobacteriaceae|g__Scardovia|s__Scardovia_unclassified	s__Scardovia_unclassified	S	1.06507e-06	1.86961e-05	0	0	0	0	0.000593	0.0051039
k__Bacteria|p__Bacteroidetes|c__Bacteroidia|o__Bacteroidales|f__Prevotellaceae|g__Prevotella|s__Prevotella_disiens	s__Prevotella_disiens	S	1.14361e-06	3.73637e-05	0	0	0	0	0.0026241	0.00486086
k__Eukaryota|p__Ascomycota|c__Saccharomycetes|o__Saccharomycetales|f__Saccharomycetaceae|g__Nakaseomyces|s__Candida_glabrata	s__Candida_glabrata	S	1.21021e-06	3.07067e-05	0	0	0	0	0.0019105	0.00473934
k__Bacteria|p__Firmicutes|c__Bacilli|o__Lactobacillales|f__Streptococcaceae|g__Streptococcus|s__Streptococcus_gordonii	s__Streptococcus_gordonii	S	1.33597e-06	3.65812e-05	0	0	0	0	0.0024953	0.00473934
k__Bacteria|p__Proteobacteria|c__Gammaproteobacteria|o__Pseudomonadales|f__Moraxellaceae|g__Acinetobacter|s__Acinetobacter_unclassified	s__Acinetobacter_unclassified	S	1.21813e-06	3.28879e-05	0	0	0	0	0.0023845	0.00449629
k__Viruses|p__Viruses_noname|c__Viruses_noname|o__Viruses_noname|f__Circoviridae|g__Gyrovirus|s__Chicken_anemia_virus	s__Chicken_anemia_virus	S	3.07593e-06	6.01985e-05	0	0	0	0	0.0036586	0.00449629
k__Bacteria|p__Bacteroidetes|c__Bacteroidia|o__Bacteroidales|f__Prevotellaceae|g__Prevotella|s__Prevotella_buccae	s__Prevotella_buccae	S	0.000162462	0.00502619	0	0	0	0	0.289496	0.00449629
k__Bacteria|p__Bacteroidetes|c__Bacteroidia|o__Bacteroidales|f__Bacteroidaceae|g__Bacteroides|s__Bacteroides_sp_4_3_47FAA	s__Bacteroides_sp_4_3_47FAA	S	0.000415065	0.00944527	0	0	0	0	0.41704	0.00437477
k__Bacteria|p__Firmicutes|c__Bacilli|o__Lactobacillales|f__Lactobacillaceae|g__Lactobacillus|s__Lactobacillus_sakei	s__Lactobacillus_sakei	S	8.3501e-07	1.76895e-05	0	0	0	0	0.0008009	0.00437477
k__Bacteria|p__Proteobacteria|c__Gammaproteobacteria|o__Pasteurellales|f__Pasteurellaceae|g__Aggregatibacter|s__Aggregatibacter_unclassified	s__Aggregatibacter_unclassified	S	3.92296e-07	9.2235e-06	0	0	0	0	0.0006048	0.00425325
k__Bacteria|p__Proteobacteria|c__Betaproteobacteria|o__Neisseriales|f__Neisseriaceae|g__Neisseria|s__Neisseria_unclassified	s__Neisseria_unclassified	S	8.50115e-07	1.56028e-05	0	0	0	0	0.0005693	0.00425325
k__Bacteria|p__Firmicutes|c__Bacilli|o__Lactobacillales|f__Carnobacteriaceae|g__Granulicatella|s__Granulicatella_unclassified	s__Granulicatella_unclassified	S	4.96038e-07	1.08626e-05	0	0	0	0	0.0006146	0.00413173
k__Bacteria|p__Proteobacteria|c__Gammaproteobacteria|o__Pasteurellales|f__Pasteurellaceae|g__Haemophilus|s__Haemophilus_sputorum	s__Haemophilus_sputorum	S	6.73448e-07	1.89694e-05	0	0	0	0	0.0014256	0.00413173
k__Bacteria|p__Firmicutes|c__Clostridia|o__Clostridiales|f__Ruminococcaceae|g__Ruminococcus|s__Ruminococcus_sp_5_1_39BFAA	s__Ruminococcus_sp_5_1_39BFAA	S	4.29309e-05	0.00079113	0	0	0	0	0.0333805	0.00413173
k__Bacteria|p__Firmicutes|c__Erysipelotrichia|o__Erysipelotrichales|f__Erysipelotrichaceae|g__Erysipelotrichaceae_noname|s__Clostridium_ramosum	s__Clostridium_ramosum	S	1.24169e-06	3.82052e-05	0	0	0	0	0.0027732	0.00401021
k__Viruses|p__Viruses_noname|c__Viruses_noname|o__Caudovirales|f__Myoviridae|g__Mulikevirus|s__Mulikevirus_unclassified	s__Mulikevirus_unclassified	S	1.27742e-06	3.41309e-05	0	0	0	0	0.0020102	0.00401021
k__Bacteria|p__Firmicutes|c__Clostridia|o__Clostridiales|f__Ruminococcaceae|g__Subdoligranulum|s__Subdoligranulum_variabile	s__Subdoligranulum_variabile	S	1.3454e-06	7.12504e-05	0	0	0	0	0.0063614	0.00401021
k__Bacteria|p__Proteobacteria|c__Gammaproteobacteria|o__Pasteurellales|f__Pasteurellaceae|g__Actinobacillus|s__Actinobacillus_pleuropneumoniae	s__Actinobacillus_pleuropneumoniae	S	1.25275e-05	0.0010266	0	0	0	0	0.0930967	0.00388869
k__Bacteria|p__Bacteroidetes|c__Bacteroidia|o__Bacteroidales|f__Bacteroidaceae|g__Bacteroides|s__Bacteroides_sp_2_1_22	s__Bacteroides_sp_2_1_22	S	7.45858e-05	0.00175096	0	0	0	0	0.0894549	0.00376716
k__Bacteria|p__Firmicutes|c__Negativicutes|o__Selenomonadales|f__Veillonellaceae|g__Megasphaera|s__Megasphaera_micronuciformis	s__Megasphaera_micronuciformis	S	4.37097e-06	0.000321365	0	0	0	0	0.0289543	0.00376716
k__Bacteria|p__Firmicutes|c__Negativicutes|o__Selenomonadales|f__Veillonellaceae|g__Selenomonas|s__Selenomonas_bovis	s__Selenomonas_bovis	S	0.000105788	0.00299028	0	0	0	0	0.179714	0.00376716
k__Bacteria|p__Proteobacteria|c__Gammaproteobacteria|o__Enterobacteriales|f__Enterobacteriaceae|g__Enterobacter|s__Enterobacter_aerogenes	s__Enterobacter_aerogenes	S	1.20018e-05	0.000718109	0	0	0	0	0.064158	0.00364564
k__Bacteria|p__Firmicutes|c__Bacilli|o__Lactobacillales|f__Lactobacillaceae|g__Lactobacillus|s__Lactobacillus_casei_paracasei	s__Lactobacillus_casei_paracasei	S	1.70526e-06	6.58649e-05	0	0	0	0	0.0053636	0.00364564
k__Bacteria|p__Firmicutes|c__Clostridia|o__Clostridiales|f__Lachnospiraceae|g__Lachnospiraceae_noname|s__Lachnospiraceae_bacterium_5_1_57FAA	s__Lachnospiraceae_bacterium_5_1_57FAA	S	1.08576e-06	5.15413e-05	0	0	0	0	0.0044495	0.00352412
k__Bacteria|p__Actinobacteria|c__Actinobacteria|o__Actinomycetales|f__Actinomycetaceae|g__Actinomyces|s__Actinomyces_viscosus	s__Actinomyces_viscosus	S	5.66156e-07	1.30138e-05	0	0	0	0	0.0005969	0.0034026
k__Bacteria|p__Bacteroidetes|c__Bacteroidia|o__Bacteroidales|f__Bacteroidaceae|g__Bacteroides|s__Bacteroides_sp_3_1_19	s__Bacteroides_sp_3_1_19	S	4.72052e-05	0.000998269	0	0	0	0	0.0450285	0.0034026
k__Bacteria|p__Proteobacteria|c__Gammaproteobacteria|o__Pasteurellales|f__Pasteurellaceae|g__Haemophilus|s__Haemophilus_parasuis	s__Haemophilus_parasuis	S	2.17411e-05	0.00179388	0	0	0	0	0.16268	0.0034026
k__Bacteria|p__Firmicutes|c__Clostridia|o__Clostridiales|f__Ruminococcaceae|g__Ruminococcus|s__Ruminococcus_flavefaciens	s__Ruminococcus_flavefaciens	S	4.04764e-07	1.17445e-05	0	0	0	0	0.0006494	0.0034026
k__Bacteria|p__Firmicutes|c__Bacilli|o__Bacillales|f__Staphylococcaceae|g__Staphylococcus|s__Staphylococcus_saprophyticus	s__Staphylococcus_saprophyticus	S	2.24112e-06	5.67696e-05	0	0	0	0	0.0025031	0.00328108
k__Bacteria|p__Firmicutes|c__Clostridia|o__Clostridiales|f__Clostridiaceae|g__Clostridium|s__Clostridium_perfringens	s__Clostridium_perfringens	S	3.08206e-06	0.000208793	0	0	0	0	0.018839	0.00315956
k__Bacteria|p__Firmicutes|c__Clostridia|o__Clostridiales|f__Clostridiaceae|g__Clostridium|s__Clostridium_scindens	s__Clostridium_scindens	S	2.58352e-06	0.000111185	0	0	0	0	0.0086558	0.00315956
k__Bacteria|p__Firmicutes|c__Bacilli|o__Lactobacillales|f__Enterococcaceae|g__Enterococcus|s__Enterococcus_faecalis	s__Enterococcus_faecalis	S	5.02722e-07	1.90154e-05	0	0	0	0	0.0013647	0.00315956
k__Bacteria|p__Bacteroidetes|c__Bacteroidia|o__Bacteroidales|f__Prevotellaceae|g__Prevotella|s__Prevotella_bivia	s__Prevotella_bivia	S	4.2846e-07	1.46972e-05	0	0	0	0	0.0009984	0.00315956
k__Bacteria|p__Proteobacteria|c__Alphaproteobacteria|o__Rhodospirillales|f__Acetobacteraceae|g__Acetobacter|s__Acetobacter_pasteurianus	s__Acetobacter_pasteurianus	S	4.74979e-06	9.76327e-05	0	0	0	0	0.0039383	0.00303804
k__Bacteria|p__Actinobacteria|c__Actinobacteria|o__Bifidobacteriales|f__Bifidobacteriaceae|g__Alloscardovia|s__Alloscardovia_omnicolens	s__Alloscardovia_omnicolens	S	1.02268e-06	3.36969e-05	0	0	0	0	0.0021104	0.00303804
k__Bacteria|p__Proteobacteria|c__Gammaproteobacteria|o__Enterobacteriales|f__Enterobacteriaceae|g__Enterobacteriaceae_noname|s__Enterobacteriaceae_bacterium_9_2_54FAA	s__Enterobacteriaceae_bacterium_9_2_54FAA	S	2.04501e-06	9.72776e-05	0	0	0	0	0.0073039	0.00303804
k__Bacteria|p__Actinobacteria|c__Actinobacteria|o__Bifidobacteriales|f__Bifidobacteriaceae|g__Gardnerella|s__Gardnerella_vaginalis	s__Gardnerella_vaginalis	S	9.1084e-07	3.32653e-05	0	0	0	0	0.0023263	0.00303804
k__Viruses|p__Viruses_noname|c__Viruses_noname|o__Viruses_noname|f__Geminiviridae|g__Mastrevirus|s__Wheat_dwarf_virus	s__Wheat_dwarf_virus	S	2.64359e-06	7.14371e-05	0	0	0	0	0.0050928	0.00303804
k__Bacteria|p__Proteobacteria|c__Gammaproteobacteria|o__Pseudomonadales|f__Moraxellaceae|g__Acinetobacter|s__Acinetobacter_pittii_calcoaceticus_nosocomialis	s__Acinetobacter_pittii_calcoaceticus_nosocomialis	S	1.13881e-06	4.49534e-05	0	0	0	0	0.0038392	0.00291651
k__Bacteria|p__Firmicutes|c__Bacilli|o__Lactobacillales|f__Enterococcaceae|g__Enterococcus|s__Enterococcus_faecium	s__Enterococcus_faecium	S	9.12808e-07	3.45357e-05	0	0	0	0	0.0025002	0.00291651
k__Bacteria|p__Synergistetes|c__Synergistia|o__Synergistales|f__Synergistaceae|g__Pyramidobacter|s__Pyramidobacter_piscolens	s__Pyramidobacter_piscolens	S	1.6796e-06	4.56215e-05	0	0	0	0	0.002791	0.00291651
k__Bacteria|p__Firmicutes|c__Bacilli|o__Bacillales|f__Staphylococcaceae|g__Staphylococcus|s__Staphylococcus_epidermidis	s__Staphylococcus_epidermidis	S	2.14145e-06	8.03864e-05	0	0	0	0	0.0061066	0.00291651
k__Bacteria|p__Proteobacteria|c__Alphaproteobacteria|o__Rhizobiales|f__Methylobacteriaceae|g__Methylobacterium|s__Methylobacterium_extorquens	s__Methylobacterium_extorquens	S	1.17103e-06	3.14031e-05	0	0	0	0	0.0020906	0.00279499
k__Bacteria|p__Proteobacteria|c__Gammaproteobacteria|o__Pasteurellales|f__Pasteurellaceae|g__Actinobacillus|s__Actinobacillus_unclassified	s__Actinobacillus_unclassified	S	3.9362e-07	9.10187e-06	0	0	0	0	0.0003502	0.00267347
k__Bacteria|p__Actinobacteria|c__Actinobacteria|o__Actinomycetales|f__Actinomycetaceae|g__Actinomyces|s__Actinomyces_turicensis	s__Actinomyces_turicensis	S	1.37771e-06	5.31272e-05	0	0	0	0	0.0036796	0.00267347
k__Bacteria|p__Fusobacteria|c__Fusobacteriia|o__Fusobacteriales|f__Fusobacteriaceae|g__Fusobacterium|s__Fusobacterium_mortiferum	s__Fusobacterium_mortiferum	S	1.10586e-05	0.000508626	0	0	0	0	0.035684	0.00267347
k__Bacteria|p__Firmicutes|c__Bacilli|o__Lactobacillales|f__Lactobacillaceae|g__Lactobacillus|s__Lactobacillus_acidophilus	s__Lactobacillus_acidophilus	S	1.14231e-06	4.67809e-05	0	0	0	0	0.0034206	0.00267347
k__Bacteria|p__Firmicutes|c__Bacilli|o__Lactobacillales|f__Lactobacillaceae|g__Lactobacillus|s__Lactobacillus_gasseri	s__Lactobacillus_gasseri	S	9.20792e-07	4.54356e-05	0	0	0	0	0.0038817	0.00267347
k__Bacteria|p__Firmicutes|c__Bacilli|o__Bacillales|f__Staphylococcaceae|g__Staphylococcus|s__Staphylococcus_aureus	s__Staphylococcus_aureus	S	7.74553e-07	2.70296e-05	0	0	0	0	0.0017035	0.00267347
k__Bacteria|p__Firmicutes|c__Clostridia|o__Clostridiales|f__Lachnospiraceae|g__Blautia|s__Blautia_hydrogenotrophica	s__Blautia_hydrogenotrophica	S	6.25325e-07	2.08493e-05	0	0	0	0	0.0011997	0.00255195
k__Bacteria|p__Firmicutes|c__Bacilli|o__Lactobacillales|f__Lactobacillaceae|g__Lactobacillus|s__Lactobacillus_fructivorans	s__Lactobacillus_fructivorans	S	1.7978e-06	5.5715e-05	0	0	0	0	0.0028654	0.00255195
k__Bacteria|p__Firmicutes|c__Clostridia|o__Clostridiales|f__Lachnospiraceae|g__Anaerostipes|s__Anaerostipes_unclassified	s__Anaerostipes_unclassified	S	1.07607e-06	3.13301e-05	0	0	0	0	0.0015954	0.00243043
k__Viruses|p__Viruses_noname|c__Viruses_noname|o__Viruses_noname|f__Retroviridae|g__Retroviridae_noname|s__Avian_endogenous_retrovirus_EAV_HP	s__Avian_endogenous_retrovirus_EAV_HP	S	1.19075e-06	3.21612e-05	0	0	0	0	0.0020131	0.00243043
k__Bacteria|p__Proteobacteria|c__Gammaproteobacteria|o__Enterobacteriales|f__Enterobacteriaceae|g__Cronobacter|s__Cronobacter_sakazakii	s__Cronobacter_sakazakii	S	1.57711e-05	0.000673275	0	0	0	0	0.0526376	0.00243043
k__Bacteria|p__Proteobacteria|c__Alphaproteobacteria|o__Rhodospirillales|f__Acetobacteraceae|g__Acetobacter|s__Acetobacter_unclassified	s__Acetobacter_unclassified	S	3.1689e-06	9.71965e-05	0	0	0	0	0.0066819	0.00230891
k__Bacteria|p__Firmicutes|c__Erysipelotrichia|o__Erysipelotrichales|f__Erysipelotrichaceae|g__Erysipelotrichaceae_noname|s__Eubacterium_dolichum	s__Eubacterium_dolichum	S	1.34681e-06	5.74715e-05	0	0	0	0	0.0048003	0.00230891
k__Bacteria|p__Firmicutes|c__Bacilli|o__Lactobacillales|f__Leuconostocaceae|g__Leuconostoc|s__Leuconostoc_mesenteroides	s__Leuconostoc_mesenteroides	S	8.92915e-07	4.007e-05	0	0	0	0	0.0031782	0.00230891
k__Viruses|p__Viruses_noname|c__Viruses_noname|o__Caudovirales|f__Podoviridae|g__P22likevirus|s__P22likevirus_unclassified	s__P22likevirus_unclassified	S	3.36493e-07	8.39264e-06	0	0	0	0	0.0004768	0.00230891
k__Bacteria|p__Bacteroidetes|c__Bacteroidia|o__Bacteroidales|f__Porphyromonadaceae|g__Parabacteroides|s__Parabacteroides_sp_D13	s__Parabacteroides_sp_D13	S	3.29321e-05	0.000914394	0	0	0	0	0.0580566	0.00230891
k__Bacteria|p__Proteobacteria|c__Betaproteobacteria|o__Burkholderiales|f__Sutterellaceae|g__Sutterella|s__Sutterella_parvirubra	s__Sutterella_parvirubra	S	0.000156085	0.00545473	0	0	0	0	0.378745	0.00230891
k__Bacteria|p__Actinobacteria|c__Actinobacteria|o__Coriobacteriales|f__Coriobacteriaceae|g__Atopobium|s__Atopobium_parvulum	s__Atopobium_parvulum	S	1.76814e-07	4.87401e-06	0	0	0	0	0.00023	0.00218739
k__Bacteria|p__Bacteroidetes|c__Bacteroidia|o__Bacteroidales|f__Bacteroidaceae|g__Bacteroides|s__Bacteroides_sp_3_2_5	s__Bacteroides_sp_3_2_5	S	1.95239e-05	0.000549975	0	0	0	0	0.0326645	0.00218739
k__Eukaryota|p__Ascomycota|c__Sordariomycetes|o__Hypocreales|f__Nectriaceae|g__Fusarium|s__Fusarium_graminearum	s__Fusarium_graminearum	S	2.57941e-07	1.0879e-05	0	0	0	0	0.0008138	0.00218739
k__Bacteria|p__Proteobacteria|c__Gammaproteobacteria|o__Enterobacteriales|f__Enterobacteriaceae|g__Salmonella|s__Salmonella_unclassified	s__Salmonella_unclassified	S	2.68757e-07	9.51005e-06	0	0	0	0	0.0006524	0.00218739
k__Bacteria|p__Proteobacteria|c__Gammaproteobacteria|o__Enterobacteriales|f__Enterobacteriaceae|g__Citrobacter|s__Citrobacter_koseri	s__Citrobacter_koseri	S	4.4668e-05	0.00270737	0	0	0	0	0.21944	0.00206586
k__Bacteria|p__Firmicutes|c__Bacilli|o__Lactobacillales|f__Lactobacillaceae|g__Lactobacillus|s__Lactobacillus_amylovorus	s__Lactobacillus_amylovorus	S	1.36814e-06	5.32497e-05	0	0	0	0	0.0038562	0.00206586
k__Bacteria|p__Firmicutes|c__Bacilli|o__Lactobacillales|f__Streptococcaceae|g__Streptococcus|s__Streptococcus_anginosus	s__Streptococcus_anginosus	S	9.79791e-07	4.04877e-05	0	0	0	0	0.0025014	0.00206586
k__Bacteria|p__Spirochaetes|c__Spirochaetia|o__Spirochaetales|f__Spirochaetaceae|g__Treponema|s__Treponema_succinifaciens	s__Treponema_succinifaciens	S	0.000238456	0.00739058	0	0	0	0	0.396368	0.00206586
k__Bacteria|p__Firmicutes|c__Bacilli|o__Lactobacillales|f__Lactobacillaceae|g__Lactobacillus|s__Lactobacillus_salivarius	s__Lactobacillus_salivarius	S	9.21461e-07	5.06143e-05	0	0	0	0	0.0044187	0.00194434
k__Bacteria|p__Bacteroidetes|c__Bacteroidia|o__Bacteroidales|f__Prevotellaceae|g__Prevotella|s__Prevotella_buccalis	s__Prevotella_buccalis	S	2.98967e-07	1.11645e-05	0	0	0	0	0.0006885	0.00194434
k__Bacteria|p__Synergistetes|c__Synergistia|o__Synergistales|f__Synergistaceae|g__Synergistes|s__Synergistes_sp_3_1_syn1	s__Synergistes_sp_3_1_syn1	S	3.97013e-05	0.00136464	0	0	0	0	0.0959154	0.00194434
k__Bacteria|p__Proteobacteria|c__Gammaproteobacteria|o__Vibrionales|f__Vibrionaceae|g__Vibrio|s__Vibrio_cholerae	s__Vibrio_cholerae	S	1.06081e-06	3.99965e-05	0	0	0	0	0.003232	0.00194434
k__Bacteria|p__Proteobacteria|c__Gammaproteobacteria|o__Enterobacteriales|f__Enterobacteriaceae|g__Yersinia|s__Yersinia_pestis	s__Yersinia_pestis	S	2.94931e-06	0.000105944	0	0	0	0	0.0069233	0.00194434
k__Bacteria|p__Proteobacteria|c__Epsilonproteobacteria|o__Campylobacterales|f__Helicobacteraceae|g__Helicobacter|s__Helicobacter_pylori	s__Helicobacter_pylori	S	1.09866e-06	4.95854e-05	0	0	0	0	0.0042977	0.00182282
k__Bacteria|p__Actinobacteria|c__Actinobacteria|o__Bifidobacteriales|f__Bifidobacteriaceae|g__Parascardovia|s__Parascardovia_denticolens	s__Parascardovia_denticolens	S	8.30502e-07	4.45822e-05	0	0	0	0	0.0038067	0.00182282
k__Viruses|p__Viruses_noname|c__Viruses_noname|o__Caudovirales|f__Myoviridae|g__Schizot4likevirus|s__Schizot4likevirus_unclassified	s__Schizot4likevirus_unclassified	S	3.99452e-06	0.000102535	0	0	0	0	0.0044155	0.00182282
k__Bacteria|p__Proteobacteria|c__Gammaproteobacteria|o__Enterobacteriales|f__Enterobacteriaceae|g__Yersinia|s__Yersinia_pseudotuberculosis	s__Yersinia_pseudotuberculosis	S	3.49547e-06	0.000152359	0	0	0	0	0.0114868	0.00182282
k__Bacteria|p__Proteobacteria|c__Gammaproteobacteria|o__Pasteurellales|f__Pasteurellaceae|g__Aggregatibacter|s__Aggregatibacter_segnis	s__Aggregatibacter_segnis	S	5.8165e-07	3.65238e-05	0	0	0	0	0.0032655	0.0017013
k__Bacteria|p__Firmicutes|c__Erysipelotrichia|o__Erysipelotrichales|f__Erysipelotrichaceae|g__Erysipelotrichaceae_noname|s__Erysipelotrichaceae_bacterium_5_2_54FAA	s__Erysipelotrichaceae_bacterium_5_2_54FAA	S	3.71345e-07	1.45213e-05	0	0	0	0	0.0010048	0.0017013
k__Bacteria|p__Firmicutes|c__Bacilli|o__Lactobacillales|f__Lactobacillaceae|g__Lactobacillus|s__Lactobacillus_reuteri	s__Lactobacillus_reuteri	S	8.49155e-07	3.04755e-05	0	0	0	0	0.0018465	0.0017013
k__Bacteria|p__Bacteroidetes|c__Bacteroidia|o__Bacteroidales|f__Porphyromonadaceae|g__Porphyromonas|s__Porphyromonas_uenonis	s__Porphyromonas_uenonis	S	1.40928e-06	8.38966e-05	0	0	0	0	0.0065383	0.0017013
k__Bacteria|p__Firmicutes|c__Bacilli|o__Bacillales|f__Bacillaceae|g__Bacillus|s__Bacillus_cereus_thuringiensis	s__Bacillus_cereus_thuringiensis	S	4.83339e-07	1.5591e-05	0	0	0	0	0.0009868	0.00157978
k__Bacteria|p__Firmicutes|c__Bacilli|o__Bacillales|f__Bacillaceae|g__Bacillus|s__Bacillus_megaterium	s__Bacillus_megaterium	S	2.21275e-06	0.000149041	0	0	0	0	0.0134212	0.00157978
k__Bacteria|p__Proteobacteria|c__Gammaproteobacteria|o__Enterobacteriales|f__Enterobacteriaceae|g__Hafnia|s__Hafnia_alvei	s__Hafnia_alvei	S	3.47589e-06	0.000290006	0	0	0	0	0.0262906	0.00157978
k__Bacteria|p__Firmicutes|c__Bacilli|o__Lactobacillales|f__Lactobacillaceae|g__Lactobacillus|s__Lactobacillus_johnsonii	s__Lactobacillus_johnsonii	S	6.49301e-07	2.69097e-05	0	0	0	0	0.0015338	0.00157978
k__Viruses|p__Viruses_noname|c__Viruses_noname|o__Viruses_noname|f__Retroviridae|g__Betaretrovirus|s__Mouse_mammary_tumor_virus	s__Mouse_mammary_tumor_virus	S	7.55223e-06	0.000280402	0	0	0	0	0.0211474	0.00157978
k__Bacteria|p__Proteobacteria|c__Gammaproteobacteria|o__Enterobacteriales|f__Enterobacteriaceae|g__Salmonella|s__Salmonella_enterica	s__Salmonella_enterica	S	4.94506e-06	0.00040156	0	0	0	0	0.0363007	0.00157978
k__Bacteria|p__Proteobacteria|c__Gammaproteobacteria|o__Enterobacteriales|f__Enterobacteriaceae|g__Serratia|s__Serratia_marcescens	s__Serratia_marcescens	S	4.77656e-06	0.000262377	0	0	0	0	0.0224072	0.00157978
k__Bacteria|p__Actinobacteria|c__Actinobacteria|o__Coriobacteriales|f__Coriobacteriaceae|g__Slackia|s__Slackia_unclassified	s__Slackia_unclassified	S	1.71649e-07	6.84771e-06	0	0	0	0	0.0005056	0.00157978
k__Bacteria|p__Firmicutes|c__Bacilli|o__Lactobacillales|f__Streptococcaceae|g__Streptococcus|s__Streptococcus_lutetiensis	s__Streptococcus_lutetiensis	S	4.58184e-07	1.56474e-05	0	0	0	0	0.0008006	0.00157978
k__Bacteria|p__Proteobacteria|c__Betaproteobacteria|o__Burkholderiales|f__Comamonadaceae|g__Comamonas|s__Comamonas_unclassified	s__Comamonas_unclassified	S	5.43954e-07	1.62926e-05	0	0	0	0	0.0008488	0.00145826
k__Bacteria|p__Fusobacteria|c__Fusobacteriia|o__Fusobacteriales|f__Fusobacteriaceae|g__Fusobacterium|s__Fusobacterium_ulcerans	s__Fusobacterium_ulcerans	S	2.79595e-06	0.0001239	0	0	0	0	0.0073615	0.00145826
k__Bacteria|p__Proteobacteria|c__Gammaproteobacteria|o__Enterobacteriales|f__Enterobacteriaceae|g__Morganella|s__Morganella_morganii	s__Morganella_morganii	S	1.08096e-06	4.4819e-05	0	0	0	0	0.0029243	0.00145826
k__Bacteria|p__Bacteroidetes|c__Bacteroidia|o__Bacteroidales|f__Porphyromonadaceae|g__Porphyromonas|s__Porphyromonas_somerae	s__Porphyromonas_somerae	S	5.86292e-07	3.0485e-05	0	0	0	0	0.0024917	0.00145826
k__Bacteria|p__Bacteroidetes|c__Bacteroidia|o__Bacteroidales|f__Prevotellaceae|g__Prevotella|s__Prevotella_timonensis	s__Prevotella_timonensis	S	9.92806e-07	6.91282e-05	0	0	0	0	0.0061792	0.00145826
k__Bacteria|p__Proteobacteria|c__Gammaproteobacteria|o__Pseudomonadales|f__Pseudomonadaceae|g__Pseudomonas|s__Pseudomonas_fragi	s__Pseudomonas_fragi	S	5.28976e-06	0.000351656	0	0	0	0	0.0307223	0.00145826
k__Bacteria|p__Proteobacteria|c__Gammaproteobacteria|o__Pseudomonadales|f__Pseudomonadaceae|g__Pseudomonas|s__Pseudomonas_putida	s__Pseudomonas_putida	S	9.02297e-08	3.87375e-06	0	0	0	0	0.0003002	0.00145826
k__Bacteria|p__Firmicutes|c__Negativicutes|o__Selenomonadales|f__Acidaminococcaceae|g__Acidaminococcus|s__Acidaminococcus_sp_D21	s__Acidaminococcus_sp_D21	S	2.43573e-05	0.000824814	0	0	0	0	0.0435841	0.00133674
k__Bacteria|p__Proteobacteria|c__Epsilonproteobacteria|o__Campylobacterales|f__Campylobacteraceae|g__Campylobacter|s__Campylobacter_gracilis	s__Campylobacter_gracilis	S	1.65419e-06	0.000103554	0	0	0	0	0.0090138	0.00133674
k__Bacteria|p__Proteobacteria|c__Epsilonproteobacteria|o__Campylobacterales|f__Campylobacteraceae|g__Campylobacter|s__Campylobacter_hominis	s__Campylobacter_hominis	S	4.21947e-07	1.65975e-05	0	0	0	0	0.0008957	0.00133674
k__Bacteria|p__Proteobacteria|c__Alphaproteobacteria|o__Alphaproteobacteria_noname|f__Alphaproteobacteria_noname|g__Candidatus_Pelagibacter|s__Candidatus_Pelagibacter_ubique	s__Candidatus_Pelagibacter_ubique	S	1.60797e-07	8.46159e-06	0	0	0	0	0.0007279	0.00133674
k__Archaea|p__Euryarchaeota|c__Halobacteria|o__Halobacteriales|f__Halobacteriaceae|g__Haloquadratum|s__Haloquadratum_walsbyi	s__Haloquadratum_walsbyi	S	8.84129e-07	4.17967e-05	0	0	0	0	0.0034181	0.00133674
k__Bacteria|p__Firmicutes|c__Bacilli|o__Lactobacillales|f__Streptococcaceae|g__Streptococcus|s__Streptococcus_mutans	s__Streptococcus_mutans	S	1.53445e-07	5.86958e-06	0	0	0	0	0.0003734	0.00133674
k__Bacteria|p__Bacteroidetes|c__Bacteroidia|o__Bacteroidales|f__Bacteroidaceae|g__Bacteroides|s__Bacteroides_sp_1_1_30	s__Bacteroides_sp_1_1_30	S	1.92718e-05	0.000634994	0	0	0	0	0.0332759	0.00121521
k__Bacteria|p__Firmicutes|c__Clostridia|o__Clostridiales|f__Lachnospiraceae|g__Butyrivibrio|s__Butyrivibrio_unclassified	s__Butyrivibrio_unclassified	S	2.5558e-05	0.00163857	0	0	0	0	0.124395	0.00121521
k__Bacteria|p__Proteobacteria|c__Alphaproteobacteria|o__Rhodospirillales|f__Acetobacteraceae|g__Gluconacetobacter|s__Gluconacetobacter_unclassified	s__Gluconacetobacter_unclassified	S	1.49253e-07	4.57739e-06	0	0	0	0	0.0002175	0.00121521
k__Viruses|p__Viruses_noname|c__Viruses_noname|o__Viruses_noname|f__Retroviridae|g__Betaretrovirus|s__Jaagsiekte_sheep_retrovirus	s__Jaagsiekte_sheep_retrovirus	S	1.09209e-06	3.66701e-05	0	0	0	0	0.002131	0.00121521
k__Bacteria|p__Firmicutes|c__Bacilli|o__Lactobacillales|f__Lactobacillaceae|g__Lactobacillus|s__Lactobacillus_crispatus	s__Lactobacillus_crispatus	S	1.41912e-06	0.000105041	0	0	0	0	0.0094778	0.00121521
k__Archaea|p__Euryarchaeota|c__Methanomicrobia|o__Methanomicrobia_noname|f__Methanomicrobia_noname|g__Methanomassiliicoccus|s__Methanomassiliicoccus_luminyensis	s__Methanomassiliicoccus_luminyensis	S	1.01198e-06	5.05516e-05	0	0	0	0	0.0039706	0.00121521
k__Bacteria|p__Bacteroidetes|c__Bacteroidetes_noname|o__Bacteroidetes_Order_II_Incertae_sedis|f__Rhodothermaceae|g__Salinibacter|s__Salinibacter_ruber	s__Salinibacter_ruber	S	4.21218e-07	2.20117e-05	0	0	0	0	0.0018217	0.00121521
k__Bacteria|p__Actinobacteria|c__Actinobacteria|o__Bifidobacteriales|f__Bifidobacteriaceae|g__Bifidobacterium|s__Bifidobacterium_pseudolongum	s__Bifidobacterium_pseudolongum	S	1.85348e-06	0.000146188	0	0	0	0	0.0132256	0.00109369
k__Bacteria|p__Firmicutes|c__Clostridia|o__Clostridiales|f__Lachnospiraceae|g__Blautia|s__Blautia_producta	s__Blautia_producta	S	1.67554e-07	8.29874e-06	0	0	0	0	0.0006839	0.00109369
k__Bacteria|p__Firmicutes|c__Bacilli|o__Lactobacillales|f__Enterococcaceae|g__Enterococcus|s__Enterococcus_hirae	s__Enterococcus_hirae	S	5.13027e-07	2.84519e-05	0	0	0	0	0.0023777	0.00109369
k__Bacteria|p__Proteobacteria|c__Gammaproteobacteria|o__Pasteurellales|f__Pasteurellaceae|g__Haemophilus|s__Haemophilus_paraphrohaemolyticus	s__Haemophilus_paraphrohaemolyticus	S	2.41706e-07	8.73898e-06	0	0	0	0	0.00054	0.00109369
k__Viruses|p__Viruses_noname|c__Viruses_noname|o__Caudovirales|f__Siphoviridae|g__Siphoviridae_noname|s__Lactobacillus_phage_Lc_Nu	s__Lactobacillus_phage_Lc_Nu	S	3.90157e-07	1.83207e-05	0	0	0	0	0.0015451	0.00109369
k__Viruses|p__Viruses_noname|c__Viruses_noname|o__Viruses_noname|f__Potyviridae|g__Potyvirus|s__Leek_yellow_stripe_virus	s__Leek_yellow_stripe_virus	S	3.60688e-07	1.172e-05	0	0	0	0	0.0005556	0.00109369
k__Bacteria|p__Tenericutes|c__Mollicutes|o__Mycoplasmatales|f__Mycoplasmataceae|g__Mycoplasma|s__Mycoplasma_pulmonis	s__Mycoplasma_pulmonis	S	7.99733e-08	3.2949e-06	0	0	0	0	0.0001916	0.00109369
k__Viruses|p__Viruses_noname|c__Viruses_noname|o__Viruses_noname|f__Viruses_noname|g__Viruses_noname|s__Porcine_stool_associated_circular_virus_3	s__Porcine_stool_associated_circular_virus_3	S	5.91726e-06	0.000376761	0	0	0	0	0.0335808	0.00109369
k__Eukaryota|p__Ascomycota|c__Schizosaccharomycetes|o__Schizosaccharomycetales|f__Schizosaccharomycetaceae|g__Schizosaccharomyces|s__Schizosaccharomyces_pombe	s__Schizosaccharomyces_pombe	S	1.33733e-06	6.26146e-05	0	0	0	0	0.0048664	0.00109369
k__Bacteria|p__Firmicutes|c__Bacilli|o__Bacillales|f__Staphylococcaceae|g__Staphylococcus|s__Staphylococcus_hominis	s__Staphylococcus_hominis	S	6.45704e-07	2.7401e-05	0	0	0	0	0.0018291	0.00109369
k__Bacteria|p__Firmicutes|c__Bacilli|o__Lactobacillales|f__Streptococcaceae|g__Streptococcus|s__Streptococcus_infantarius	s__Streptococcus_infantarius	S	2.40977e-07	1.45449e-05	0	0	0	0	0.001285	0.00109369
k__Bacteria|p__Spirochaetes|c__Spirochaetia|o__Spirochaetales|f__Brachyspiraceae|g__Brachyspira|s__Brachyspira_pilosicoli	s__Brachyspira_pilosicoli	S	2.00973e-06	0.000151073	0	0	0	0	0.0136416	0.000972172
k__Bacteria|p__Proteobacteria|c__Epsilonproteobacteria|o__Campylobacterales|f__Campylobacteraceae|g__Campylobacter|s__Campylobacter_concisus	s__Campylobacter_concisus	S	1.98068e-07	1.28627e-05	0	0	0	0	0.0011387	0.000972172
k__Bacteria|p__Firmicutes|c__Clostridia|o__Clostridiales|f__Clostridiaceae|g__Clostridium|s__Clostridium_butyricum	s__Clostridium_butyricum	S	3.05238e-07	1.68965e-05	0	0	0	0	0.0013749	0.000972172
k__Bacteria|p__Proteobacteria|c__Gammaproteobacteria|o__Oceanospirillales|f__Halomonadaceae|g__Halomonas|s__Halomonas_unclassified	s__Halomonas_unclassified	S	4.88662e-07	1.68013e-05	0	0	0	0	0.0008036	0.000972172
k__Viruses|p__Viruses_noname|c__Viruses_noname|o__Viruses_noname|f__Adenoviridae|g__Mastadenovirus|s__Human_adenovirus_D	s__Human_adenovirus_D	S	1.39713e-07	6.6508e-06	0	0	0	0	0.0004642	0.000972172
k__Viruses|p__Viruses_noname|c__Viruses_noname|o__Caudovirales|f__Siphoviridae|g__Tunalikevirus|s__Klebsiella_phage_KP36	s__Klebsiella_phage_KP36	S	8.22963e-05	0.00420205	0	0	0	0	0.351102	0.000972172
k__Bacteria|p__Firmicutes|c__Bacilli|o__Lactobacillales|f__Leuconostocaceae|g__Leuconostoc|s__Leuconostoc_unclassified	s__Leuconostoc_unclassified	S	2.32969e-07	7.92802e-06	0	0	0	0	0.0003484	0.000972172
k__Bacteria|p__Firmicutes|c__Clostridia|o__Clostridiales|f__Lachnospiraceae|g__Marvinbryantia|s__Marvinbryantia_formatexigens	s__Marvinbryantia_formatexigens	S	1.58415e-07	7.86061e-06	0	0	0	0	0.0006416	0.000972172
k__Viruses|p__Viruses_noname|c__Viruses_noname|o__Viruses_noname|f__Parvoviridae|g__Parvoviridae_noname|s__Myzus_persicae_densovirus	s__Myzus_persicae_densovirus	S	9.11182e-06	0.000323037	0	0	0	0	0.0166586	0.000972172
k__Viruses|p__Viruses_noname|c__Viruses_noname|o__Mononegavirales|f__Paramyxoviridae|g__Rubulavirus|s__Parainfluenza_virus_5	s__Parainfluenza_virus_5	S	9.41909e-06	0.000411689	0	0	0	0	0.0244772	0.000972172
k__Bacteria|p__Proteobacteria|c__Gammaproteobacteria|o__Enterobacteriales|f__Enterobacteriaceae|g__Shigella|s__Shigella_sonnei	s__Shigella_sonnei	S	1.13115e-06	7.55916e-05	0	0	0	0	0.0067612	0.000972172
k__Bacteria|p__Proteobacteria|c__Gammaproteobacteria|o__Xanthomonadales|f__Xanthomonadaceae|g__Stenotrophomonas|s__Stenotrophomonas_maltophilia	s__Stenotrophomonas_maltophilia	S	8.58537e-07	5.51564e-05	0	0	0	0	0.0048546	0.000972172
k__Bacteria|p__Firmicutes|c__Bacilli|o__Lactobacillales|f__Streptococcaceae|g__Streptococcus|s__Streptococcus_sobrinus	s__Streptococcus_sobrinus	S	4.23539e-07	2.21486e-05	0	0	0	0	0.0018354	0.000972172
k__Bacteria|p__Firmicutes|c__Bacilli|o__Lactobacillales|f__Streptococcaceae|g__Streptococcus|s__Streptococcus_tigurinus	s__Streptococcus_tigurinus	S	4.44039e-08	1.52697e-06	0	0	0	0	7.28e-05	0.000972172
k__Viruses|p__Viruses_noname|c__Viruses_noname|o__Caudovirales|f__Siphoviridae|g__T5likevirus|s__T5likevirus_unclassified	s__T5likevirus_unclassified	S	9.40555e-05	0.00539803	0	0	0	0	0.455367	0.000972172
k__Bacteria|p__Proteobacteria|c__Gammaproteobacteria|o__Aeromonadales|f__Aeromonadaceae|g__Aeromonas|s__Aeromonas_veronii	s__Aeromonas_veronii	S	1.04611e-05	0.000610727	0	0	0	0	0.0519934	0.00085065
k__Bacteria|p__Proteobacteria|c__Gammaproteobacteria|o__Pasteurellales|f__Pasteurellaceae|g__Aggregatibacter|s__Aggregatibacter_aphrophilus	s__Aggregatibacter_aphrophilus	S	2.64978e-07	1.24317e-05	0	0	0	0	0.0008843	0.00085065
k__Bacteria|p__Actinobacteria|c__Actinobacteria|o__Coriobacteriales|f__Coriobacteriaceae|g__Atopobium|s__Atopobium_vaginae	s__Atopobium_vaginae	S	2.43225e-07	1.47752e-05	0	0	0	0	0.0012673	0.00085065
k__Bacteria|p__Proteobacteria|c__Epsilonproteobacteria|o__Campylobacterales|f__Campylobacteraceae|g__Campylobacter|s__Campylobacter_jejuni	s__Campylobacter_jejuni	S	2.18607e-06	0.000157339	0	0	0	0	0.014092	0.00085065
k__Bacteria|p__Firmicutes|c__Erysipelotrichia|o__Erysipelotrichales|f__Erysipelotrichaceae|g__Erysipelotrichaceae_noname|s__Clostridium_innocuum	s__Clostridium_innocuum	S	1.02576e-07	4.38019e-06	0	0	0	0	0.0002774	0.00085065
k__Bacteria|p__Actinobacteria|c__Actinobacteria|o__Coriobacteriales|f__Coriobacteriaceae|g__Cryptobacterium|s__Cryptobacterium_curtum	s__Cryptobacterium_curtum	S	2.0322e-07	1.27362e-05	0	0	0	0	0.0010755	0.00085065
k__Eukaryota|p__Eukaryota_noname|c__Eukaryota_noname|o__Eukaryota_noname|f__Hexamitidae|g__Giardia|s__Giardia_intestinalis	s__Giardia_intestinalis	S	1.64734e-07	8.12986e-06	0	0	0	0	0.0006127	0.00085065
k__Bacteria|p__Firmicutes|c__Clostridia|o__Clostridiales|f__Clostridiales_Family_XI_Incertae_Sedis|g__Parvimonas|s__Parvimonas_unclassified	s__Parvimonas_unclassified	S	8.28169e-08	3.29296e-06	0	0	0	0	0.0001818	0.00085065
k__Viruses|p__Viruses_noname|c__Viruses_noname|o__Viruses_noname|f__Reoviridae|g__Oryzavirus|s__Rice_ragged_stunt_virus	s__Rice_ragged_stunt_virus	S	2.36977e-06	0.000137306	0	0	0	0	0.0120135	0.00085065
k__Bacteria|p__Firmicutes|c__Negativicutes|o__Selenomonadales|f__Veillonellaceae|g__Veillonella|s__Veillonella_ratti	s__Veillonella_ratti	S	1.66501e-05	0.00149669	0	0	0	0	0.135769	0.00085065
k__Bacteria|p__Actinobacteria|c__Actinobacteria|o__Actinomycetales|f__Actinomycetaceae|g__Actinomyces|s__Actinomyces_oris	s__Actinomyces_oris	S	1.00292e-07	4.52735e-06	0	0	0	0	0.0003364	0.000729129
k__Bacteria|p__Proteobacteria|c__Betaproteobacteria|o__Burkholderiales|f__Comamonadaceae|g__Alicycliphilus|s__Alicycliphilus_unclassified	s__Alicycliphilus_unclassified	S	3.07996e-07	1.28506e-05	0	0	0	0	0.000865	0.000729129
k__Bacteria|p__Proteobacteria|c__Betaproteobacteria|o__Burkholderiales|f__Alcaligenaceae|g__Bordetella|s__Bordetella_bronchiseptica_parapertussis	s__Bordetella_bronchiseptica_parapertussis	S	1.66707e-06	0.000138947	0	0	0	0	0.0125861	0.000729129
k__Bacteria|p__Proteobacteria|c__Betaproteobacteria|o__Burkholderiales|f__Alcaligenaceae|g__Bordetella|s__Bordetella_pertussis	s__Bordetella_pertussis	S	1.60149e-06	0.000135439	0	0	0	0	0.0122752	0.000729129
k__Bacteria|p__Proteobacteria|c__Epsilonproteobacteria|o__Campylobacterales|f__Campylobacteraceae|g__Campylobacter|s__Campylobacter_upsaliensis	s__Campylobacter_upsaliensis	S	1.98724e-07	1.11981e-05	0	0	0	0	0.0008419	0.000729129
k__Bacteria|p__Bacteroidetes|c__Bacteroidia|o__Bacteroidales|f__Porphyromonadaceae|g__Dysgonomonas|s__Dysgonomonas_unclassified	s__Dysgonomonas_unclassified	S	8.30137e-07	4.03527e-05	0	0	0	0	0.0029306	0.000729129
k__Bacteria|p__Actinobacteria|c__Actinobacteria|o__Coriobacteriales|f__Coriobacteriaceae|g__Eggerthella|s__Eggerthella_sp_1_3_56FAA	s__Eggerthella_sp_1_3_56FAA	S	4.37598e-06	0.000211468	0	0	0	0	0.016982	0.000729129
k__Bacteria|p__Proteobacteria|c__Betaproteobacteria|o__Neisseriales|f__Neisseriaceae|g__Eikenella|s__Eikenella_corrodens	s__Eikenella_corrodens	S	8.67104e-07	6.5573e-05	0	0	0	0	0.0058747	0.000729129
k__Bacteria|p__Firmicutes|c__Erysipelotrichia|o__Erysipelotrichales|f__Erysipelotrichaceae|g__Erysipelotrichaceae_noname|s__Erysipelotrichaceae_bacterium_3_1_53	s__Erysipelotrichaceae_bacterium_3_1_53	S	8.6584e-08	4.63967e-06	0	0	0	0	0.0003891	0.000729129
k__Bacteria|p__Firmicutes|c__Clostridia|o__Clostridiales|f__Eubacteriaceae|g__Eubacterium|s__Eubacterium_brachy	s__Eubacterium_brachy	S	1.1039e-07	5.3963e-06	0	0	0	0	0.0003963	0.000729129
k__Bacteria|p__Firmicutes|c__Bacilli|o__Lactobacillales|f__Carnobacteriaceae|g__Granulicatella|s__Granulicatella_elegans	s__Granulicatella_elegans	S	4.86815e-08	2.8482e-06	0	0	0	0	0.0002188	0.000729129
k__Viruses|p__Viruses_noname|c__Viruses_noname|o__Viruses_noname|f__Adenoviridae|g__Mastadenovirus|s__Human_adenovirus_B	s__Human_adenovirus_B	S	1.28229e-06	0.000111963	0	0	0	0	0.0101544	0.000729129
k__Viruses|p__Viruses_noname|c__Viruses_noname|o__Viruses_noname|f__Polyomaviridae|g__Polyomavirus|s__JC_polyomavirus	s__JC_polyomavirus	S	2.81388e-06	0.000161974	0	0	0	0	0.0140018	0.000729129
k__Bacteria|p__Synergistetes|c__Synergistia|o__Synergistales|f__Synergistaceae|g__Jonquetella|s__Jonquetella_anthropi	s__Jonquetella_anthropi	S	9.20403e-08	4.51743e-06	0	0	0	0	0.0003509	0.000729129
k__Bacteria|p__Firmicutes|c__Clostridia|o__Clostridiales|f__Lachnospiraceae|g__Lachnospiraceae_noname|s__Lachnospiraceae_bacterium_9_1_43BFAA	s__Lachnospiraceae_bacterium_9_1_43BFAA	S	6.52327e-08	2.80735e-06	0	0	0	0	0.0001982	0.000729129
k__Bacteria|p__Firmicutes|c__Bacilli|o__Lactobacillales|f__Lactobacillaceae|g__Lactobacillus|s__Lactobacillus_oris	s__Lactobacillus_oris	S	3.04909e-07	1.45258e-05	0	0	0	0	0.0008812	0.000729129
k__Bacteria|p__Firmicutes|c__Bacilli|o__Lactobacillales|f__Lactobacillaceae|g__Lactobacillus|s__Lactobacillus_sanfranciscensis	s__Lactobacillus_sanfranciscensis	S	1.08349e-07	4.29317e-06	0	0	0	0	0.0002302	0.000729129
k__Bacteria|p__Firmicutes|c__Bacilli|o__Lactobacillales|f__Leuconostocaceae|g__Leuconostoc|s__Leuconostoc_lactis	s__Leuconostoc_lactis	S	4.58464e-07	3.21012e-05	0	0	0	0	0.0028821	0.000729129
k__Bacteria|p__Tenericutes|c__Mollicutes|o__Mycoplasmatales|f__Mycoplasmataceae|g__Mycoplasma|s__Mycoplasma_capricolum	s__Mycoplasma_capricolum	S	1.53648e-06	8.02834e-05	0	0	0	0	0.0062634	0.000729129
k__Eukaryota|p__Ascomycota|c__Saccharomycetes|o__Saccharomycetales|f__Saccharomycetaceae|g__Naumovozyma|s__Naumovozyma_unclassified	s__Naumovozyma_unclassified	S	8.21363e-08	3.42496e-06	0	0	0	0	0.0001843	0.000729129
k__Viruses|p__Viruses_noname|c__Viruses_noname|o__Viruses_noname|f__Potyviridae|g__Potyvirus|s__Onion_yellow_dwarf_virus	s__Onion_yellow_dwarf_virus	S	2.34925e-07	1.09825e-05	0	0	0	0	0.000824	0.000729129
k__Eukaryota|p__Apicomplexa|c__Aconoidasida|o__Haemosporida|f__Haemosporida_noname|g__Plasmodium|s__Plasmodium_falciparum	s__Plasmodium_falciparum	S	1.0802e-07	5.26383e-06	0	0	0	0	0.0003556	0.000729129
k__Bacteria|p__Bacteroidetes|c__Bacteroidia|o__Bacteroidales|f__Prevotellaceae|g__Prevotella|s__Prevotella_melaninogenica	s__Prevotella_melaninogenica	S	1.10609e-07	5.41965e-06	0	0	0	0	0.0004317	0.000729129
k__Viruses|p__Viruses_noname|c__Viruses_noname|o__Caudovirales|f__Siphoviridae|g__Siphoviridae_noname|s__Propionibacterium_phage_PAD20	s__Propionibacterium_phage_PAD20	S	1.13062e-06	4.27034e-05	0	0	0	0	0.0021587	0.000729129
k__Bacteria|p__Proteobacteria|c__Gammaproteobacteria|o__Enterobacteriales|f__Enterobacteriaceae|g__Proteus|s__Proteus_mirabilis	s__Proteus_mirabilis	S	5.94714e-07	3.60904e-05	0	0	0	0	0.0030415	0.000729129
k__Bacteria|p__Actinobacteria|c__Actinobacteria|o__Actinomycetales|f__Micrococcaceae|g__Rothia|s__Rothia_aeria	s__Rothia_aeria	S	1.82586e-07	7.99528e-06	0	0	0	0	0.0004815	0.000729129
k__Bacteria|p__Firmicutes|c__Negativicutes|o__Selenomonadales|f__Veillonellaceae|g__Selenomonas|s__Selenomonas_noxia	s__Selenomonas_noxia	S	9.63432e-06	0.000870888	0	0	0	0	0.0790014	0.000729129
k__Bacteria|p__Proteobacteria|c__Gammaproteobacteria|o__Vibrionales|f__Vibrionaceae|g__Vibrio|s__Vibrio_alginolyticus	s__Vibrio_alginolyticus	S	5.12699e-08	2.08044e-06	0	0	0	0	9.59e-05	0.000729129
k__Bacteria|p__Proteobacteria|c__Gammaproteobacteria|o__Aeromonadales|f__Aeromonadaceae|g__Aeromonas|s__Aeromonas_unclassified	s__Aeromonas_unclassified	S	1.86949e-06	0.00012651	0	0	0	0	0.0107834	0.000607607
k__Bacteria|p__Firmicutes|c__Negativicutes|o__Selenomonadales|f__Veillonellaceae|g__Anaeroglobus|s__Anaeroglobus_geminatus	s__Anaeroglobus_geminatus	S	2.54343e-06	0.000201976	0	0	0	0	0.0182136	0.000607607
k__Bacteria|p__Bacteroidetes|c__Bacteroidia|o__Bacteroidales|f__Bacteroidaceae|g__Bacteroides|s__Bacteroides_gallinarum	s__Bacteroides_gallinarum	S	1.7155e-05	0.000885992	0	0	0	0	0.0575618	0.000607607
k__Bacteria|p__Bacteroidetes|c__Bacteroidia|o__Bacteroidales|f__Bacteroidaceae|g__Bacteroides|s__Bacteroides_sp_1_1_14	s__Bacteroides_sp_1_1_14	S	1.29702e-05	0.000831229	0	0	0	0	0.0735617	0.000607607
k__Bacteria|p__Bacteroidetes|c__Bacteroidia|o__Bacteroidales|f__Bacteroidaceae|g__Bacteroides|s__Bacteroides_sp_9_1_42FAA	s__Bacteroides_sp_9_1_42FAA	S	1.29638e-05	0.000582328	0	0	0	0	0.0389005	0.000607607
k__Bacteria|p__Proteobacteria|c__Deltaproteobacteria|o__Desulfovibrionales|f__Desulfovibrionaceae|g__Bilophila|s__Bilophila_sp_4_1_30	s__Bilophila_sp_4_1_30	S	1.07507e-05	0.000521271	0	0	0	0	0.0380852	0.000607607
k__Viruses|p__Viruses_noname|c__Viruses_noname|o__Viruses_noname|f__Orthomyxoviridae|g__Influenzavirus_A|s__Influenza_A_virus	s__Influenza_A_virus	S	4.21031e-06	0.00036119	0	0	0	0	0.0327455	0.000607607
k__Bacteria|p__Firmicutes|c__Clostridia|o__Clostridiales|f__Lachnospiraceae|g__Lachnospiraceae_noname|s__Lachnospiraceae_bacterium_6_1_63FAA	s__Lachnospiraceae_bacterium_6_1_63FAA	S	5.95212e-08	4.25059e-06	0	0	0	0	0.0003815	0.000607607
k__Bacteria|p__Firmicutes|c__Bacilli|o__Lactobacillales|f__Lactobacillaceae|g__Lactobacillus|s__Lactobacillus_iners	s__Lactobacillus_iners	S	6.86292e-07	4.29173e-05	0	0	0	0	0.0036319	0.000607607
k__Bacteria|p__Firmicutes|c__Bacilli|o__Lactobacillales|f__Lactobacillaceae|g__Lactobacillus|s__Lactobacillus_plantarum	s__Lactobacillus_plantarum	S	7.12966e-08	3.3592e-06	0	0	0	0	0.000209	0.000607607
k__Bacteria|p__Tenericutes|c__Mollicutes|o__Mycoplasmatales|f__Mycoplasmataceae|g__Mycoplasma|s__Mycoplasma_arginini	s__Mycoplasma_arginini	S	4.10378e-08	2.21228e-06	0	0	0	0	0.000176	0.000607607
k__Bacteria|p__Firmicutes|c__Bacilli|o__Lactobacillales|f__Lactobacillaceae|g__Pediococcus|s__Pediococcus_pentosaceus	s__Pediococcus_pentosaceus	S	4.02844e-08	1.76716e-06	0	0	0	0	0.0001039	0.000607607
k__Bacteria|p__Bacteroidetes|c__Bacteroidia|o__Bacteroidales|f__Porphyromonadaceae|g__Porphyromonas|s__Porphyromonas_endodontalis	s__Porphyromonas_endodontalis	S	2.26844e-07	1.52713e-05	0	0	0	0	0.0013519	0.000607607
k__Bacteria|p__Bacteroidetes|c__Bacteroidia|o__Bacteroidales|f__Prevotellaceae|g__Prevotella|s__Prevotella_histicola	s__Prevotella_histicola	S	8.10913e-08	5.15264e-06	0	0	0	0	0.0004481	0.000607607
k__Viruses|p__Viruses_noname|c__Viruses_noname|o__Caudovirales|f__Siphoviridae|g__Siphoviridae_noname|s__Propionibacterium_phage_P104A	s__Propionibacterium_phage_P104A	S	1.18827e-06	5.15194e-05	0	0	0	0	0.0031353	0.000607607
k__Viruses|p__Viruses_noname|c__Viruses_noname|o__Viruses_noname|f__Retroviridae|g__Gammaretrovirus|s__RD114_retrovirus	s__RD114_retrovirus	S	2.66606e-07	1.19725e-05	0	0	0	0	0.0006911	0.000607607
k__Viruses|p__Viruses_noname|c__Viruses_noname|o__Picornavirales|f__Iflaviridae|g__Iflaviridae_noname|s__Spodoptera_exigua_iflavirus_1	s__Spodoptera_exigua_iflavirus_1	S	9.49326e-08	4.77668e-06	0	0	0	0	0.0003737	0.000607607
k__Viruses|p__Viruses_noname|c__Viruses_noname|o__Caudovirales|f__Siphoviridae|g__Siphoviridae_noname|s__Staphylococcus_phage_PVL	s__Staphylococcus_phage_PVL	S	1.0345e-06	4.70165e-05	0	0	0	0	0.0029174	0.000607607
k__Bacteria|p__Proteobacteria|c__Gammaproteobacteria|o__Xanthomonadales|f__Xanthomonadaceae|g__Stenotrophomonas|s__Stenotrophomonas_unclassified	s__Stenotrophomonas_unclassified	S	6.10159e-08	3.73442e-06	0	0	0	0	0.0003133	0.000607607
k__Bacteria|p__Firmicutes|c__Bacilli|o__Lactobacillales|f__Leuconostocaceae|g__Weissella|s__Weissella_cibaria	s__Weissella_cibaria	S	1.70543e-07	1.06922e-05	0	0	0	0	0.0009203	0.000607607
k__Viruses|p__Viruses_noname|c__Viruses_noname|o__Caudovirales|f__Myoviridae|g__P2likeviruses|s__Yersinia_phage_L_413C	s__Yersinia_phage_L_413C	S	4.77373e-07	2.11857e-05	0	0	0	0	0.0013099	0.000607607
k__Bacteria|p__Proteobacteria|c__Gammaproteobacteria|o__Aeromonadales|f__Aeromonadaceae|g__Aeromonas|s__Aeromonas_caviae	s__Aeromonas_caviae	S	8.11119e-07	6.438e-05	0	0	0	0	0.0057934	0.000486086
k__Bacteria|p__Bacteroidetes|c__Bacteroidia|o__Bacteroidales|f__Rikenellaceae|g__Alistipes|s__Alistipes_sp_JC136	s__Alistipes_sp_JC136	S	8.23499e-06	0.000412132	0	0	0	0	0.0286197	0.000486086
k__Bacteria|p__Bacteroidetes|c__Bacteroidia|o__Bacteroidales|f__Prevotellaceae|g__Alloprevotella|s__Alloprevotella_unclassified	s__Alloprevotella_unclassified	S	8.18082e-08	4.78099e-06	0	0	0	0	0.0003982	0.000486086
k__Bacteria|p__Actinobacteria|c__Actinobacteria|o__Actinomycetales|f__Brevibacteriaceae|g__Brevibacterium|s__Brevibacterium_unclassified	s__Brevibacterium_unclassified	S	1.75878e-07	8.8285e-06	0	0	0	0	0.0005561	0.000486086
k__Bacteria|p__Candidatus_Saccharibacteria|c__Candidatus_Saccharibacteria_noname|o__Candidatus_Saccharibacteria_noname|f__Candidatus_Saccharibacteria_noname|g__Candidatus_Saccharibacteria_noname|s__candidate_division_TM7_single_cell_isolate_TM7c	s__candidate_division_TM7_single_cell_isolate_TM7c	S	1.4777e-07	9.27805e-06	0	0	0	0	0.0007997	0.000486086
k__Bacteria|p__Firmicutes|c__Clostridia|o__Clostridiales|f__Clostridiaceae|g__Clostridium|s__Clostridium_celatum	s__Clostridium_celatum	S	2.38486e-07	1.52765e-05	0	0	0	0	0.0012347	0.000486086
k__Bacteria|p__Firmicutes|c__Bacilli|o__Lactobacillales|f__Enterococcaceae|g__Enterococcus|s__Enterococcus_casseliflavus	s__Enterococcus_casseliflavus	S	6.66399e-07	3.84613e-05	0	0	0	0	0.0030688	0.000486086
k__Bacteria|p__Firmicutes|c__Clostridia|o__Clostridiales|f__Eubacteriaceae|g__Eubacterium|s__Eubacterium_limosum	s__Eubacterium_limosum	S	3.03196e-08	1.58178e-06	0	0	0	0	0.0001188	0.000486086
k__Viruses|p__Viruses_noname|c__Viruses_noname|o__Viruses_noname|f__Retroviridae|g__Alpharetrovirus|s__Fujinami_sarcoma_virus	s__Fujinami_sarcoma_virus	S	1.48524e-07	7.04592e-06	0	0	0	0	0.0004173	0.000486086
k__Bacteria|p__Fusobacteria|c__Fusobacteriia|o__Fusobacteriales|f__Fusobacteriaceae|g__Fusobacterium|s__Fusobacterium_nucleatum	s__Fusobacterium_nucleatum	S	7.92541e-06	0.000516046	0	0	0	0	0.0391307	0.000486086
k__Archaea|p__Euryarchaeota|c__Halobacteria|o__Halobacteriales|f__Halobacteriaceae|g__Haloquadratum|s__Haloquadratum_unclassified	s__Haloquadratum_unclassified	S	7.75671e-08	4.28244e-06	0	0	0	0	0.0002999	0.000486086
k__Bacteria|p__Synergistetes|c__Synergistia|o__Synergistales|f__Synergistaceae|g__Jonquetella|s__Jonquetella_unclassified	s__Jonquetella_unclassified	S	3.8255e-08	1.95608e-06	0	0	0	0	0.0001212	0.000486086
k__Bacteria|p__Firmicutes|c__Clostridia|o__Clostridiales|f__Lachnospiraceae|g__Lachnospiraceae_noname|s__Lachnospiraceae_bacterium_2_1_46FAA	s__Lachnospiraceae_bacterium_2_1_46FAA	S	1.12954e-07	7.07919e-06	0	0	0	0	0.0005464	0.000486086
k__Bacteria|p__Firmicutes|c__Bacilli|o__Lactobacillales|f__Lactobacillaceae|g__Lactobacillus|s__Lactobacillus_animalis	s__Lactobacillus_animalis	S	1.17912e-07	7.77518e-06	0	0	0	0	0.0006851	0.000486086
k__Bacteria|p__Firmicutes|c__Bacilli|o__Lactobacillales|f__Lactobacillaceae|g__Lactobacillus|s__Lactobacillus_gastricus	s__Lactobacillus_gastricus	S	1.67092e-08	8.41864e-07	0	0	0	0	5.34e-05	0.000486086
k__Viruses|p__Viruses_noname|c__Viruses_noname|o__Caudovirales|f__Siphoviridae|g__Siphoviridae_noname|s__Lactobacillus_phage_PL_1	s__Lactobacillus_phage_PL_1	S	2.81079e-07	1.33119e-05	0	0	0	0	0.0008763	0.000486086
k__Bacteria|p__Firmicutes|c__Bacilli|o__Lactobacillales|f__Lactobacillaceae|g__Lactobacillus|s__Lactobacillus_vaginalis	s__Lactobacillus_vaginalis	S	1.86961e-07	1.61869e-05	0	0	0	0	0.0014677	0.000486086
k__Bacteria|p__Firmicutes|c__Bacilli|o__Lactobacillales|f__Streptococcaceae|g__Lactococcus|s__Lactococcus_garvieae	s__Lactococcus_garvieae	S	6.30089e-08	3.54093e-06	0	0	0	0	0.0002787	0.000486086
k__Viruses|p__Viruses_noname|c__Viruses_noname|o__Caudovirales|f__Siphoviridae|g__Siphoviridae_noname|s__Lactococcus_phage_936_sensu_lato	s__Lactococcus_phage_936_sensu_lato	S	3.6664e-06	0.000188611	0	0	0	0	0.0140446	0.000486086
k__Bacteria|p__Proteobacteria|c__Gammaproteobacteria|o__Enterobacteriales|f__Enterobacteriaceae|g__Plesiomonas|s__Plesiomonas_shigelloides	s__Plesiomonas_shigelloides	S	7.3851e-07	4.85713e-05	0	0	0	0	0.0042055	0.000486086
k__Bacteria|p__Firmicutes|c__Bacilli|o__Lactobacillales|f__Leuconostocaceae|g__Weissella|s__Weissella_confusa	s__Weissella_confusa	S	8.53129e-07	6.71381e-05	0	0	0	0	0.0060488	0.000486086
k__Bacteria|p__Firmicutes|c__Negativicutes|o__Selenomonadales|f__Acidaminococcaceae|g__Acidaminococcus|s__Acidaminococcus_sp_BV3L6	s__Acidaminococcus_sp_BV3L6	S	7.02632e-06	0.000402494	0	0	0	0	0.0303999	0.000364564
k__Bacteria|p__Proteobacteria|c__Gammaproteobacteria|o__Pseudomonadales|f__Moraxellaceae|g__Acinetobacter|s__Acinetobacter_soli	s__Acinetobacter_soli	S	2.26054e-07	1.75217e-05	0	0	0	0	0.0015669	0.000364564
k__Bacteria|p__Proteobacteria|c__Epsilonproteobacteria|o__Campylobacterales|f__Campylobacteraceae|g__Arcobacter|s__Arcobacter_butzleri	s__Arcobacter_butzleri	S	5.18143e-07	3.65347e-05	0	0	0	0	0.0032058	0.000364564
k__Bacteria|p__Actinobacteria|c__Actinobacteria|o__Coriobacteriales|f__Coriobacteriaceae|g__Atopobium|s__Atopobium_rimae	s__Atopobium_rimae	S	8.91724e-08	5.80702e-06	0	0	0	0	0.0004525	0.000364564
k__Viruses|p__Viruses_noname|c__Viruses_noname|o__Viruses_noname|f__Retroviridae|g__Alpharetrovirus|s__Avian_myelocytomatosis_virus	s__Avian_myelocytomatosis_virus	S	1.51902e-07	9.4333e-06	0	0	0	0	0.0007921	0.000364564
k__Bacteria|p__Firmicutes|c__Bacilli|o__Bacillales|f__Bacillaceae|g__Bacillus|s__Bacillus_subtilis	s__Bacillus_subtilis	S	2.93499e-07	1.63233e-05	0	0	0	0	0.0012122	0.000364564
k__Bacteria|p__Bacteroidetes|c__Bacteroidia|o__Bacteroidales|f__Bacteroidaceae|g__Bacteroides|s__Bacteroides_sp_3_1_33FAA	s__Bacteroides_sp_3_1_33FAA	S	8.40529e-06	0.000611726	0	0	0	0	0.0544815	0.000364564
k__Viruses|p__Viruses_noname|c__Viruses_noname|o__Viruses_noname|f__Geminiviridae|g__Becurtovirus|s__Beet_curly_top_Iran_virus	s__Beet_curly_top_Iran_virus	S	2.2799e-06	0.00012724	0	0	0	0	0.0095056	0.000364564
k__Bacteria|p__Proteobacteria|c__Betaproteobacteria|o__Burkholderiales|f__Burkholderiaceae|g__Burkholderia|s__Burkholderia_unclassified	s__Burkholderia_unclassified	S	2.32057e-07	1.43037e-05	0	0	0	0	0.0011953	0.000364564
k__Eukaryota|p__Ascomycota|c__Saccharomycetes|o__Saccharomycetales|f__Saccharomycetales_noname|g__Candida|s__Candida_albicans	s__Candida_albicans	S	4.15786e-07	3.18033e-05	0	0	0	0	0.0028475	0.000364564
k__Viruses|p__Viruses_noname|c__Viruses_noname|o__Viruses_noname|f__Potyviridae|g__Potyvirus|s__Chilli_veinal_mottle_virus	s__Chilli_veinal_mottle_virus	S	1.834e-07	1.00154e-05	0	0	0	0	0.0006724	0.000364564
k__Bacteria|p__Firmicutes|c__Clostridia|o__Clostridiales|f__Clostridiaceae|g__Clostridium|s__Clostridium_hylemonae	s__Clostridium_hylemonae	S	1.7414e-08	1.05066e-06	0	0	0	0	8.24e-05	0.000364564
k__Bacteria|p__Firmicutes|c__Clostridia|o__Clostridiales|f__Clostridiaceae|g__Clostridium|s__Clostridium_sp_ATCC_BAA_442	s__Clostridium_sp_ATCC_BAA_442	S	3.68507e-06	0.000193972	0	0	0	0	0.0115597	0.000364564
k__Bacteria|p__Actinobacteria|c__Actinobacteria|o__Actinomycetales|f__Corynebacteriaceae|g__Corynebacterium|s__Corynebacterium_glutamicum	s__Corynebacterium_glutamicum	S	4.35411e-08	3.04382e-06	0	0	0	0	0.0002647	0.000364564
k__Bacteria|p__Actinobacteria|c__Actinobacteria|o__Actinomycetales|f__Corynebacteriaceae|g__Corynebacterium|s__Corynebacterium_kroppenstedtii	s__Corynebacterium_kroppenstedtii	S	1.21862e-07	7.33995e-06	0	0	0	0	0.0006014	0.000364564
k__Bacteria|p__Actinobacteria|c__Actinobacteria|o__Actinomycetales|f__Corynebacteriaceae|g__Corynebacterium|s__Corynebacterium_matruchotii	s__Corynebacterium_matruchotii	S	3.28375e-07	2.12228e-05	0	0	0	0	0.0017547	0.000364564
k__Bacteria|p__Actinobacteria|c__Actinobacteria|o__Actinomycetales|f__Corynebacteriaceae|g__Corynebacterium|s__Corynebacterium_tuberculostearicum	s__Corynebacterium_tuberculostearicum	S	6.69826e-08	3.73585e-06	0	0	0	0	0.0002782	0.000364564
k__Bacteria|p__Proteobacteria|c__Betaproteobacteria|o__Burkholderiales|f__Comamonadaceae|g__Delftia|s__Delftia_unclassified	s__Delftia_unclassified	S	1.02601e-07	7.45601e-06	0	0	0	0	0.0006641	0.000364564
k__Eukaryota|p__Eukaryota_noname|c__Eukaryota_noname|o__Eukaryota_noname|f__Eukaryota_noname|g__Entamoeba|s__Entamoeba_dispar	s__Entamoeba_dispar	S	2.80836e-08	1.67559e-06	0	0	0	0	0.0001102	0.000364564
k__Viruses|p__Viruses_noname|c__Viruses_noname|o__Caudovirales|f__Myoviridae|g__P2likeviruses|s__Enterobacteria_phage_PsP3	s__Enterobacteria_phage_PsP3	S	9.17876e-07	5.49193e-05	0	0	0	0	0.0044711	0.000364564
k__Bacteria|p__Proteobacteria|c__Gammaproteobacteria|o__Pasteurellales|f__Pasteurellaceae|g__Haemophilus|s__Haemophilus_haemolyticus	s__Haemophilus_haemolyticus	S	3.74286e-08	2.33437e-06	0	0	0	0	0.0001519	0.000364564
k__Bacteria|p__Firmicutes|c__Bacilli|o__Lactobacillales|f__Lactobacillaceae|g__Lactobacillus|s__Lactobacillus_antri	s__Lactobacillus_antri	S	1.13805e-07	9.42315e-06	0	0	0	0	0.0008522	0.000364564
k__Bacteria|p__Firmicutes|c__Bacilli|o__Lactobacillales|f__Lactobacillaceae|g__Lactobacillus|s__Lactobacillus_brevis	s__Lactobacillus_brevis	S	2.987e-08	1.63364e-06	0	0	0	0	0.0001168	0.000364564
k__Bacteria|p__Firmicutes|c__Bacilli|o__Lactobacillales|f__Lactobacillaceae|g__Lactobacillus|s__Lactobacillus_jensenii	s__Lactobacillus_jensenii	S	5.20719e-07	2.86106e-05	0	0	0	0	0.0019572	0.000364564
k__Viruses|p__Viruses_noname|c__Viruses_noname|o__Caudovirales|f__Siphoviridae|g__Siphoviridae_noname|s__Lactococcus_phage_jm3	s__Lactococcus_phage_jm3	S	3.29764e-05	0.00235799	0	0	0	0	0.209199	0.000364564
k__Viruses|p__Viruses_noname|c__Viruses_noname|o__Viruses_noname|f__Retroviridae|g__Betaretrovirus|s__Mason_Pfizer_monkey_virus	s__Mason_Pfizer_monkey_virus	S	4.08589e-06	0.000219942	0	0	0	0	0.0148945	0.000364564
k__Bacteria|p__Proteobacteria|c__Gammaproteobacteria|o__Enterobacteriales|f__Enterobacteriaceae|g__Pectobacterium|s__Pectobacterium_carotovorum	s__Pectobacterium_carotovorum	S	4.88395e-08	2.58858e-06	0	0	0	0	0.0001494	0.000364564
k__Bacteria|p__Proteobacteria|c__Gammaproteobacteria|o__Enterobacteriales|f__Enterobacteriaceae|g__Pectobacterium|s__Pectobacterium_unclassified	s__Pectobacterium_unclassified	S	9.01446e-08	5.5971e-06	0	0	0	0	0.0003916	0.000364564
k__Viruses|p__Viruses_noname|c__Viruses_noname|o__Viruses_noname|f__Parvoviridae|g__Parvovirus|s__Porcine_parvovirus	s__Porcine_parvovirus	S	1.6132e-07	9.45033e-06	0	0	0	0	0.0007205	0.000364564
k__Viruses|p__Viruses_noname|c__Viruses_noname|o__Viruses_noname|f__Viruses_noname|g__Viruses_noname|s__Porcine_stool_associated_circular_virus_2	s__Porcine_stool_associated_circular_virus_2	S	2.44963e-06	0.000172137	0	0	0	0	0.0148474	0.000364564
k__Bacteria|p__Bacteroidetes|c__Bacteroidia|o__Bacteroidales|f__Prevotellaceae|g__Prevotella|s__Prevotella_amnii	s__Prevotella_amnii	S	7.88188e-08	5.1638e-06	0	0	0	0	0.0004263	0.000364564
k__Bacteria|p__Bacteroidetes|c__Bacteroidia|o__Bacteroidales|f__Prevotellaceae|g__Prevotella|s__Prevotella_denticola	s__Prevotella_denticola	S	4.87726e-07	4.23252e-05	0	0	0	0	0.0038363	0.000364564
k__Bacteria|p__Bacteroidetes|c__Bacteroidia|o__Bacteroidales|f__Prevotellaceae|g__Prevotella|s__Prevotella_multisaccharivorax	s__Prevotella_multisaccharivorax	S	1.13598e-07	8.45715e-06	0	0	0	0	0.0007567	0.000364564
k__Bacteria|p__Bacteroidetes|c__Bacteroidia|o__Bacteroidales|f__Prevotellaceae|g__Prevotella|s__Prevotella_oris	s__Prevotella_oris	S	5.41864e-08	3.07242e-06	0	0	0	0	0.0002084	0.000364564
k__Viruses|p__Viruses_noname|c__Viruses_noname|o__Caudovirales|f__Siphoviridae|g__Siphoviridae_noname|s__Propionibacterium_phage_PHL060L00	s__Propionibacterium_phage_PHL060L00	S	8.06586e-07	4.85103e-05	0	0	0	0	0.0038395	0.000364564
k__Bacteria|p__Proteobacteria|c__Gammaproteobacteria|o__Enterobacteriales|f__Enterobacteriaceae|g__Proteus|s__Proteus_unclassified	s__Proteus_unclassified	S	8.85891e-09	5.36523e-07	0	0	0	0	4.22e-05	0.000364564
k__Viruses|p__Viruses_noname|c__Viruses_noname|o__Caudovirales|f__Myoviridae|g__P2likeviruses|s__Pseudomonas_phage_phiCTX	s__Pseudomonas_phage_phiCTX	S	1.01868e-05	0.00078933	0	0	0	0	0.0709653	0.000364564
k__Bacteria|p__Proteobacteria|c__Gammaproteobacteria|o__Pseudomonadales|f__Pseudomonadaceae|g__Pseudomonas|s__Pseudomonas_stutzeri	s__Pseudomonas_stutzeri	S	8.75197e-08	6.07293e-06	0	0	0	0	0.000535	0.000364564
k__Bacteria|p__Firmicutes|c__Bacilli|o__Lactobacillales|f__Streptococcaceae|g__Streptococcus|s__Streptococcus_pasteurianus	s__Streptococcus_pasteurianus	S	2.773e-07	2.416e-05	0	0	0	0	0.0021907	0.000364564
k__Viruses|p__Viruses_noname|c__Viruses_noname|o__Caudovirales|f__Siphoviridae|g__Siphoviridae_noname|s__Streptococcus_phage_2972	s__Streptococcus_phage_2972	S	2.6995e-06	0.000161161	0	0	0	0	0.012779	0.000364564
k__Bacteria|p__Firmicutes|c__Bacilli|o__Lactobacillales|f__Streptococcaceae|g__Streptococcus|s__Streptococcus_pyogenes	s__Streptococcus_pyogenes	S	5.06817e-07	2.94204e-05	0	0	0	0	0.0021802	0.000364564
k__Bacteria|p__Proteobacteria|c__Betaproteobacteria|o__Burkholderiales|f__Burkholderiales_noname|g__Thiomonas|s__Thiomonas_unclassified	s__Thiomonas_unclassified	S	1.86924e-07	1.02569e-05	0	0	0	0	0.0007389	0.000364564
k__Viruses|p__Viruses_noname|c__Viruses_noname|o__Caudovirales|f__Myoviridae|g__Schizot4likevirus|s__Vibrio_phage_KVP40	s__Vibrio_phage_KVP40	S	2.77526e-06	0.000159299	0	0	0	0	0.010958	0.000364564
k__Bacteria|p__Proteobacteria|c__Alphaproteobacteria|o__Rickettsiales|f__Anaplasmataceae|g__Wolbachia|s__Wolbachia_unclassified	s__Wolbachia_unclassified	S	1.80338e-08	1.16812e-06	0	0	0	0	0.0001003	0.000364564
k__Bacteria|p__Proteobacteria|c__Betaproteobacteria|o__Burkholderiales|f__Alcaligenaceae|g__Achromobacter|s__Achromobacter_xylosoxidans	s__Achromobacter_xylosoxidans	S	5.63981e-08	4.39367e-06	0	0	0	0	0.000392	0.000243043
k__Bacteria|p__Firmicutes|c__Negativicutes|o__Selenomonadales|f__Acidaminococcaceae|g__Acidaminococcus|s__Acidaminococcus_sp_HPA0509	s__Acidaminococcus_sp_HPA0509	S	3.80156e-06	0.000286352	0	0	0	0	0.0252717	0.000243043
k__Bacteria|p__Actinobacteria|c__Actinobacteria|o__Actinobacteria_noname|f__Actinobacteria_noname|g__Actinobacteria_noname|s__actinobacterium_SCGC_AAA023_D18	s__actinobacterium_SCGC_AAA023_D18	S	5.3834e-09	4.05608e-07	0	0	0	0	3.58e-05	0.000243043
k__Bacteria|p__Firmicutes|c__Bacilli|o__Lactobacillales|f__Aerococcaceae|g__Aerococcus|s__Aerococcus_urinae	s__Aerococcus_urinae	S	1.29906e-08	8.64378e-07	0	0	0	0	6.82e-05	0.000243043
k__Bacteria|p__Proteobacteria|c__Alphaproteobacteria|o__Alphaproteobacteria_noname|f__Alphaproteobacteria_noname|g__Alphaproteobacteria_noname|s__alpha_proteobacterium_SCGC_AAA024_N17	s__alpha_proteobacterium_SCGC_AAA024_N17	S	1.74383e-08	1.21266e-06	0	0	0	0	0.0001018	0.000243043
k__Bacteria|p__Proteobacteria|c__Alphaproteobacteria|o__Alphaproteobacteria_noname|f__Alphaproteobacteria_noname|g__Alphaproteobacteria_noname|s__alpha_proteobacterium_SCGC_AAA027_J10	s__alpha_proteobacterium_SCGC_AAA027_J10	S	2.6042e-08	2.06019e-06	0	0	0	0	0.0001845	0.000243043
k__Viruses|p__Viruses_noname|c__Viruses_noname|o__Caudovirales|f__Siphoviridae|g__Siphoviridae_noname|s__Bacteroides_phage_B124_14	s__Bacteroides_phage_B124_14	S	5.08846e-05	0.00334645	0	0	0	0	0.256783	0.000243043
k__Bacteria|p__Bacteroidetes|c__Bacteroidia|o__Bacteroidales|f__Bacteroidaceae|g__Bacteroides|s__Bacteroides_sp_2_1_33B	s__Bacteroides_sp_2_1_33B	S	2.816e-06	0.00020171	0	0	0	0	0.017346	0.000243043
k__Bacteria|p__Bacteroidetes|c__Bacteroidia|o__Bacteroidales|f__Bacteroidaceae|g__Bacteroides|s__Bacteroides_sp_2_1_56FAA	s__Bacteroides_sp_2_1_56FAA	S	1.04421e-05	0.000835552	0	0	0	0	0.0750064	0.000243043
k__Bacteria|p__Bacteroidetes|c__Bacteroidia|o__Bacteroidales|f__Bacteroidaceae|g__Bacteroides|s__Bacteroides_sp_2_2_4	s__Bacteroides_sp_2_2_4	S	4.05876e-06	0.000263267	0	0	0	0	0.0192146	0.000243043
k__Bacteria|p__Bacteroidetes|c__Bacteroidia|o__Bacteroidales|f__Bacteroidaceae|g__Bacteroides|s__Bacteroides_sp_3_1_23	s__Bacteroides_sp_3_1_23	S	2.27602e-06	0.00014718	0	0	0	0	0.0105653	0.000243043
k__Bacteria|p__Bacteroidetes|c__Bacteroidia|o__Bacteroidales|f__Bacteroidaceae|g__Bacteroides|s__Bacteroides_sp_D22	s__Bacteroides_sp_D22	S	2.41771e-06	0.000177162	0	0	0	0	0.0154424	0.000243043
k__Bacteria|p__Proteobacteria|c__Epsilonproteobacteria|o__Campylobacterales|f__Campylobacteraceae|g__Campylobacter|s__Campylobacter_showae	s__Campylobacter_showae	S	1.53482e-08	1.27778e-06	0	0	0	0	0.0001154	0.000243043
k__Bacteria|p__Candidatus_Saccharibacteria|c__Candidatus_Saccharibacteria_noname|o__Candidatus_Saccharibacteria_noname|f__Candidatus_Saccharibacteria_noname|g__Candidatus_Saccharibacteria_noname|s__candidate_division_TM7_single_cell_isolate_TM7b	s__candidate_division_TM7_single_cell_isolate_TM7b	S	2.76583e-08	1.88514e-06	0	0	0	0	0.0001547	0.000243043
k__Bacteria|p__Firmicutes|c__Clostridia|o__Clostridiales|f__Clostridiaceae|g__Clostridium|s__Clostridium_methylpentosum	s__Clostridium_methylpentosum	S	1.21947e-07	1.07934e-05	0	0	0	0	0.0009788	0.000243043
k__Bacteria|p__Actinobacteria|c__Actinobacteria|o__Coriobacteriales|f__Coriobacteriaceae|g__Collinsella|s__Collinsella_sp_GD3	s__Collinsella_sp_GD3	S	2.26431e-06	0.000146339	0	0	0	0	0.0104678	0.000243043
k__Bacteria|p__Proteobacteria|c__Gammaproteobacteria|o__Enterobacteriales|f__Enterobacteriaceae|g__Cronobacter|s__Cronobacter_unclassified	s__Cronobacter_unclassified	S	8.39713e-09	7.20023e-07	0	0	0	0	6.52e-05	0.000243043
k__Eukaryota|p__Apicomplexa|c__Coccidia|o__Eucoccidiorida|f__Cryptosporidiidae|g__Cryptosporidium|s__Cryptosporidium_unclassified	s__Cryptosporidium_unclassified	S	1.57249e-08	1.31781e-06	0	0	0	0	0.0001191	0.000243043
k__Bacteria|p__Bacteroidetes|c__Bacteroidia|o__Bacteroidales|f__Porphyromonadaceae|g__Dysgonomonas|s__Dysgonomonas_gadei	s__Dysgonomonas_gadei	S	2.08057e-07	1.36571e-05	0	0	0	0	0.0010423	0.000243043
k__Bacteria|p__Proteobacteria|c__Gammaproteobacteria|o__Pseudomonadales|f__Moraxellaceae|g__Enhydrobacter|s__Enhydrobacter_aerosaccus	s__Enhydrobacter_aerosaccus	S	1.09855e-08	7.66178e-07	0	0	0	0	6.45e-05	0.000243043
k__Bacteria|p__Proteobacteria|c__Gammaproteobacteria|o__Enterobacteriales|f__Enterobacteriaceae|g__Enterobacter|s__Enterobacter_hormaechei	s__Enterobacter_hormaechei	S	1.73095e-07	1.48878e-05	0	0	0	0	0.0013484	0.000243043
k__Bacteria|p__Proteobacteria|c__Gammaproteobacteria|o__Enterobacteriales|f__Enterobacteriaceae|g__Enterobacter|s__Enterobacter_mori	s__Enterobacter_mori	S	3.13768e-08	2.35951e-06	0	0	0	0	0.0002081	0.000243043
k__Bacteria|p__Proteobacteria|c__Gammaproteobacteria|o__Enterobacteriales|f__Enterobacteriaceae|g__Enterobacter|s__Enterobacter_sp_MGH_8	s__Enterobacter_sp_MGH_8	S	5.29541e-06	0.000430864	0	0	0	0	0.038792	0.000243043
k__Viruses|p__Viruses_noname|c__Viruses_noname|o__Caudovirales|f__Siphoviridae|g__Lambdalikevirus|s__Enterobacteria_phage_HK630	s__Enterobacteria_phage_HK630	S	1.8096e-06	0.000116569	0	0	0	0	0.0081378	0.000243043
k__Viruses|p__Viruses_noname|c__Viruses_noname|o__Caudovirales|f__Siphoviridae|g__Tunalikevirus|s__Enterobacteria_phage_T1	s__Enterobacteria_phage_T1	S	1.2528e-06	8.29293e-05	0	0	0	0	0.0064696	0.000243043
k__Viruses|p__Viruses_noname|c__Viruses_noname|o__Caudovirales|f__Podoviridae|g__T7likevirus|s__Enterobacteria_phage_T7	s__Enterobacteria_phage_T7	S	1.62896e-05	0.00119459	0	0	0	0	0.104169	0.000243043
k__Bacteria|p__Firmicutes|c__Bacilli|o__Lactobacillales|f__Enterococcaceae|g__Enterococcus|s__Enterococcus_avium	s__Enterococcus_avium	S	3.31267e-08	2.69467e-06	0	0	0	0	0.0002426	0.000243043
k__Bacteria|p__Proteobacteria|c__Gammaproteobacteria|o__Enterobacteriales|f__Enterobacteriaceae|g__Escherichia|s__Escherichia_fergusonii	s__Escherichia_fergusonii	S	4.59254e-07	3.36358e-05	0	0	0	0	0.0029311	0.000243043
k__Bacteria|p__Proteobacteria|c__Gammaproteobacteria|o__Enterobacteriales|f__Enterobacteriaceae|g__Escherichia|s__Escherichia_hermannii	s__Escherichia_hermannii	S	4.62754e-08	3.84823e-06	0	0	0	0	0.0003475	0.000243043
k__Viruses|p__Viruses_noname|c__Viruses_noname|o__Caudovirales|f__Myoviridae|g__Myoviridae_noname|s__Escherichia_phage_phAPEC8	s__Escherichia_phage_phAPEC8	S	9.19556e-06	0.000718045	0	0	0	0	0.0641026	0.000243043
k__Bacteria|p__Fusobacteria|c__Fusobacteriia|o__Fusobacteriales|f__Fusobacteriaceae|g__Fusobacterium|s__Fusobacterium_gonidiaformans	s__Fusobacterium_gonidiaformans	S	4.38692e-09	3.19077e-07	0	0	0	0	2.77e-05	0.000243043
k__Bacteria|p__Fusobacteria|c__Fusobacteriia|o__Fusobacteriales|f__Fusobacteriaceae|g__Fusobacterium|s__Fusobacterium_periodonticum	s__Fusobacterium_periodonticum	S	5.1039e-09	3.85853e-07	0	0	0	0	3.41e-05	0.000243043
k__Bacteria|p__Firmicutes|c__Bacilli|o__Lactobacillales|f__Carnobacteriaceae|g__Granulicatella|s__Granulicatella_adiacens	s__Granulicatella_adiacens	S	1.1824e-08	9.06503e-07	0	0	0	0	8.05e-05	0.000243043
k__Archaea|p__Euryarchaeota|c__Halobacteria|o__Halobacteriales|f__Halobacteriaceae|g__Halorubrum|s__Halorubrum_unclassified	s__Halorubrum_unclassified	S	9.70349e-08	7.04232e-06	0	0	0	0	0.0006106	0.000243043
k__Bacteria|p__Proteobacteria|c__Epsilonproteobacteria|o__Campylobacterales|f__Helicobacteraceae|g__Helicobacter|s__Helicobacter_cinaedi	s__Helicobacter_cinaedi	S	2.76315e-07	2.37327e-05	0	0	0	0	0.0021493	0.000243043
k__Bacteria|p__Proteobacteria|c__Epsilonproteobacteria|o__Campylobacterales|f__Helicobacteraceae|g__Helicobacter|s__Helicobacter_winghamensis	s__Helicobacter_winghamensis	S	3.14986e-06	0.000284591	0	0	0	0	0.0258161	0.000243043
k__Viruses|p__Viruses_noname|c__Viruses_noname|o__Viruses_noname|f__Flaviviridae|g__Flavivirus|s__Japanese_encephalitis_virus	s__Japanese_encephalitis_virus	S	2.82294e-08	1.82275e-06	0	0	0	0	0.0001296	0.000243043
k__Viruses|p__Viruses_noname|c__Viruses_noname|o__Caudovirales|f__Myoviridae|g__T4likevirus|s__Klebsiella_phage_KP15	s__Klebsiella_phage_KP15	S	5.09434e-06	0.00037739	0	0	0	0	0.0330721	0.000243043
k__Bacteria|p__Firmicutes|c__Bacilli|o__Lactobacillales|f__Lactobacillaceae|g__Lactobacillus|s__Lactobacillus_sp_7_1_47FAA	s__Lactobacillus_sp_7_1_47FAA	S	9.53506e-07	6.19327e-05	0	0	0	0	0.0045494	0.000243043
k__Viruses|p__Viruses_noname|c__Viruses_noname|o__Caudovirales|f__Siphoviridae|g__Siphoviridae_noname|s__Lactococcus_phage_jm2	s__Lactococcus_phage_jm2	S	3.82064e-05	0.00335136	0	0	0	0	0.303833	0.000243043
k__Eukaryota|p__Eukaryota_noname|c__Eukaryota_noname|o__Kinetoplastida|f__Trypanosomatidae|g__Leishmania|s__Leishmania_mexicana	s__Leishmania_mexicana	S	1.17921e-06	0.000105894	0	0	0	0	0.0096056	0.000243043
k__Viruses|p__Viruses_noname|c__Viruses_noname|o__Caudovirales|f__Siphoviridae|g__Siphoviridae_noname|s__Leuconostoc_phage_P793	s__Leuconostoc_phage_P793	S	6.16588e-07	4.5017e-05	0	0	0	0	0.0039163	0.000243043
k__Viruses|p__Viruses_noname|c__Viruses_noname|o__Caudovirales|f__Siphoviridae|g__Siphoviridae_noname|s__Leuconostoc_phage_phiLN04	s__Leuconostoc_phage_phiLN04	S	9.60129e-07	6.90559e-05	0	0	0	0	0.0059545	0.000243043
k__Bacteria|p__Firmicutes|c__Bacilli|o__Lactobacillales|f__Leuconostocaceae|g__Leuconostoc|s__Leuconostoc_pseudomesenteroides	s__Leuconostoc_pseudomesenteroides	S	2.04278e-08	1.35072e-06	0	0	0	0	0.0001051	0.000243043
k__Bacteria|p__Proteobacteria|c__Betaproteobacteria|o__Burkholderiales|f__Comamonadaceae|g__Limnohabitans|s__Limnohabitans_unclassified	s__Limnohabitans_unclassified	S	2.44987e-08	1.84732e-06	0	0	0	0	0.0001631	0.000243043
k__Bacteria|p__Proteobacteria|c__Betaproteobacteria|o__Neisseriales|f__Neisseriaceae|g__Neisseria|s__Neisseria_meningitidis	s__Neisseria_meningitidis	S	6.68368e-09	4.72212e-07	0	0	0	0	4.02e-05	0.000243043
k__Bacteria|p__Actinobacteria|c__Actinobacteria|o__Coriobacteriales|f__Coriobacteriaceae|g__Olsenella|s__Olsenella_uli	s__Olsenella_uli	S	5.33844e-08	3.48085e-06	0	0	0	0	0.0002598	0.000243043
k__Bacteria|p__Firmicutes|c__Clostridia|o__Clostridiales|f__Oscillospiraceae|g__Oscillibacter|s__Oscillibacter_sp_KLE_1728	s__Oscillibacter_sp_KLE_1728	S	8.64928e-06	0.000739208	0	0	0	0	0.0669219	0.000243043
k__Bacteria|p__Proteobacteria|c__Gammaproteobacteria|o__Enterobacteriales|f__Enterobacteriaceae|g__Pantoea|s__Pantoea_unclassified	s__Pantoea_unclassified	S	1.08442e-06	9.67605e-05	0	0	0	0	0.0087763	0.000243043
k__Bacteria|p__Bacteroidetes|c__Bacteroidia|o__Bacteroidales|f__Porphyromonadaceae|g__Parabacteroides|s__Parabacteroides_sp_20_3	s__Parabacteroides_sp_20_3	S	2.40216e-06	0.000157505	0	0	0	0	0.0119804	0.000243043
k__Viruses|p__Viruses_noname|c__Viruses_noname|o__Viruses_noname|f__Luteoviridae|g__Polerovirus|s__Pepper_vein_yellows_virus	s__Pepper_vein_yellows_virus	S	7.98609e-06	0.000531404	0	0	0	0	0.0419318	0.000243043
k__Bacteria|p__Bacteroidetes|c__Bacteroidia|o__Bacteroidales|f__Porphyromonadaceae|g__Porphyromonas|s__Porphyromonas_gingivalis	s__Porphyromonas_gingivalis	S	6.50018e-07	4.65047e-05	0	0	0	0	0.0039959	0.000243043
k__Bacteria|p__Bacteroidetes|c__Bacteroidia|o__Bacteroidales|f__Prevotellaceae|g__Prevotella|s__Prevotella_bergensis	s__Prevotella_bergensis	S	1.92855e-08	1.59564e-06	0	0	0	0	0.000144	0.000243043
k__Bacteria|p__Bacteroidetes|c__Bacteroidia|o__Bacteroidales|f__Prevotellaceae|g__Prevotella|s__Prevotella_oralis	s__Prevotella_oralis	S	2.10366e-07	1.61322e-05	0	0	0	0	0.0014327	0.000243043
k__Bacteria|p__Bacteroidetes|c__Bacteroidia|o__Bacteroidales|f__Prevotellaceae|g__Prevotella|s__Prevotella_salivae	s__Prevotella_salivae	S	2.33564e-08	1.74904e-06	0	0	0	0	0.000154	0.000243043
k__Viruses|p__Viruses_noname|c__Viruses_noname|o__Caudovirales|f__Siphoviridae|g__Siphoviridae_noname|s__Propionibacterium_phage_PAS50	s__Propionibacterium_phage_PAS50	S	3.75185e-07	2.41003e-05	0	0	0	0	0.0016278	0.000243043
k__Bacteria|p__Proteobacteria|c__Gammaproteobacteria|o__Pseudomonadales|f__Pseudomonadaceae|g__Pseudomonas|s__Pseudomonas_mendocina	s__Pseudomonas_mendocina	S	3.07571e-08	2.113e-06	0	0	0	0	0.0001751	0.000243043
k__Bacteria|p__Proteobacteria|c__Alphaproteobacteria|o__Rhizobiales|f__Rhizobiaceae|g__Rhizobium|s__Rhizobium_etli	s__Rhizobium_etli	S	3.16199e-08	2.29722e-06	0	0	0	0	0.0001993	0.000243043
k__Viruses|p__Viruses_noname|c__Viruses_noname|o__Caudovirales|f__Podoviridae|g__P22likevirus|s__Salmonella_phage_HK620	s__Salmonella_phage_HK620	S	3.04008e-06	0.00025443	0	0	0	0	0.0229915	0.000243043
k__Viruses|p__Viruses_noname|c__Viruses_noname|o__Mononegavirales|f__Paramyxoviridae|g__Respirovirus|s__Sendai_virus	s__Sendai_virus	S	2.22358e-06	0.00014386	0	0	0	0	0.0103574	0.000243043
k__Viruses|p__Viruses_noname|c__Viruses_noname|o__Caudovirales|f__Myoviridae|g__T4likevirus|s__Shigella_phage_Shfl2	s__Shigella_phage_Shfl2	S	2.44753e-06	0.00020993	0	0	0	0	0.0190101	0.000243043
k__Viruses|p__Viruses_noname|c__Viruses_noname|o__Caudovirales|f__Siphoviridae|g__Siphoviridae_noname|s__Staphylococcus_phage_3A	s__Staphylococcus_phage_3A	S	7.37574e-07	4.75196e-05	0	0	0	0	0.0033218	0.000243043
k__Bacteria|p__Bacteroidetes|c__Bacteroidia|o__Bacteroidales|f__Porphyromonadaceae|g__Tannerella|s__Tannerella_forsythia	s__Tannerella_forsythia	S	2.05578e-07	1.67945e-05	0	0	0	0	0.001513	0.000243043
k__Bacteria|p__Firmicutes|c__Bacilli|o__Lactobacillales|f__Leuconostocaceae|g__Weissella|s__Weissella_unclassified	s__Weissella_unclassified	S	2.13513e-07	1.803e-05	0	0	0	0	0.0016307	0.000243043
k__Bacteria|p__Firmicutes|c__Bacilli|o__Lactobacillales|f__Aerococcaceae|g__Abiotrophia|s__Abiotrophia_defectiva	s__Abiotrophia_defectiva	S	6.57431e-09	5.96381e-07	0	0	0	0	5.41e-05	0.000121521
k__Bacteria|p__Proteobacteria|c__Betaproteobacteria|o__Burkholderiales|f__Alcaligenaceae|g__Achromobacter|s__Achromobacter_piechaudii	s__Achromobacter_piechaudii	S	1.10585e-09	1.00315e-07	0	0	0	0	9.1e-06	0.000121521
k__Bacteria|p__Proteobacteria|c__Gammaproteobacteria|o__Pseudomonadales|f__Moraxellaceae|g__Acinetobacter|s__Acinetobacter_johnsonii	s__Acinetobacter_johnsonii	S	8.39713e-09	7.61736e-07	0	0	0	0	6.91e-05	0.000121521
k__Bacteria|p__Actinobacteria|c__Actinobacteria|o__Actinobacteria_noname|f__Actinobacteria_noname|g__Actinobacteria_noname|s__actinobacterium_SCGC_AAA024_D14	s__actinobacterium_SCGC_AAA024_D14	S	3.81577e-09	3.46143e-07	0	0	0	0	3.14e-05	0.000121521
k__Bacteria|p__Actinobacteria|c__Actinobacteria|o__Actinobacteria_noname|f__Actinobacteria_noname|g__Actinobacteria_noname|s__actinobacterium_SCGC_AAA044_N04	s__actinobacterium_SCGC_AAA044_N04	S	1.82282e-09	1.65355e-07	0	0	0	0	1.5e-05	0.000121521
k__Bacteria|p__Actinobacteria|c__Actinobacteria|o__Actinomycetales|f__Actinomycetaceae|g__Actinobaculum|s__Actinobaculum_schaalii	s__Actinobaculum_schaalii	S	3.2908e-08	2.98521e-06	0	0	0	0	0.0002708	0.000121521
k__Bacteria|p__Actinobacteria|c__Actinobacteria|o__Actinomycetales|f__Actinomycetaceae|g__Actinomyces|s__Actinomyces_johnsonii	s__Actinomyces_johnsonii	S	5.1039e-10	4.62994e-08	0	0	0	0	4.2e-06	0.000121521
k__Bacteria|p__Actinobacteria|c__Actinobacteria|o__Actinomycetales|f__Actinomycetaceae|g__Actinomyces|s__Actinomyces_massiliensis	s__Actinomyces_massiliensis	S	5.03585e-08	4.56821e-06	0	0	0	0	0.0004144	0.000121521
k__Bacteria|p__Actinobacteria|c__Actinobacteria|o__Actinomycetales|f__Actinomycetaceae|g__Actinomyces|s__Actinomyces_naeslundii	s__Actinomyces_naeslundii	S	1.73411e-08	1.57308e-06	0	0	0	0	0.0001427	0.000121521
k__Bacteria|p__Actinobacteria|c__Actinobacteria|o__Actinomycetales|f__Actinomycetaceae|g__Actinomyces|s__Actinomyces_urogenitalis	s__Actinomyces_urogenitalis	S	1.95042e-08	1.7693e-06	0	0	0	0	0.0001605	0.000121521
k__Viruses|p__Viruses_noname|c__Viruses_noname|o__Viruses_noname|f__Parvoviridae|g__Dependovirus|s__Adeno_associated_virus_2	s__Adeno_associated_virus_2	S	4.62997e-08	4.20002e-06	0	0	0	0	0.000381	0.000121521
k__Viruses|p__Viruses_noname|c__Viruses_noname|o__Viruses_noname|f__Parvoviridae|g__Dependovirus|s__Adeno_associated_virus_3	s__Adeno_associated_virus_3	S	5.62401e-08	5.10176e-06	0	0	0	0	0.0004628	0.000121521
k__Bacteria|p__Proteobacteria|c__Alphaproteobacteria|o__Alphaproteobacteria_noname|f__Alphaproteobacteria_noname|g__Alphaproteobacteria_noname|s__alpha_proteobacterium_SCGC_AAA027_L15	s__alpha_proteobacterium_SCGC_AAA027_L15	S	1.13501e-08	1.02961e-06	0	0	0	0	9.34e-05	0.000121521
k__Bacteria|p__Proteobacteria|c__Alphaproteobacteria|o__Alphaproteobacteria_noname|f__Alphaproteobacteria_noname|g__Alphaproteobacteria_noname|s__alpha_proteobacterium_SCGC_AAA280_P20	s__alpha_proteobacterium_SCGC_AAA280_P20	S	1.11921e-08	1.01528e-06	0	0	0	0	9.21e-05	0.000121521
k__Bacteria|p__Actinobacteria|c__Actinobacteria|o__Actinomycetales|f__Pseudonocardiaceae|g__Amycolatopsis|s__Amycolatopsis_orientalis	s__Amycolatopsis_orientalis	S	3.35156e-08	3.04033e-06	0	0	0	0	0.0002758	0.000121521
k__Bacteria|p__Proteobacteria|c__Epsilonproteobacteria|o__Campylobacterales|f__Campylobacteraceae|g__Arcobacter|s__Arcobacter_unclassified	s__Arcobacter_unclassified	S	3.93e-08	3.56506e-06	0	0	0	0	0.0003234	0.000121521
k__Bacteria|p__Cyanobacteria|c__Cyanobacteria_noname|o__Oscillatoriales|f__Oscillatoriales_noname|g__Arthrospira|s__Arthrospira_unclassified	s__Arthrospira_unclassified	S	1.04022e-08	9.43627e-07	0	0	0	0	8.56e-05	0.000121521
k__Viruses|p__Viruses_noname|c__Viruses_noname|o__Viruses_noname|f__Retroviridae|g__Alpharetrovirus|s__Avian_carcinoma_virus	s__Avian_carcinoma_virus	S	5.90837e-08	5.35971e-06	0	0	0	0	0.0004862	0.000121521
k__Viruses|p__Viruses_noname|c__Viruses_noname|o__Viruses_noname|f__Tectiviridae|g__Tectivirus|s__Bacillus_phage_GIL16c	s__Bacillus_phage_GIL16c	S	1.06805e-06	9.68871e-05	0	0	0	0	0.008789	0.000121521
k__Viruses|p__Viruses_noname|c__Viruses_noname|o__Caudovirales|f__Siphoviridae|g__Siphoviridae_noname|s__Bacteroides_phage_B40_8	s__Bacteroides_phage_B40_8	S	1.16257e-06	0.000105461	0	0	0	0	0.0095668	0.000121521
k__Bacteria|p__Bacteroidetes|c__Bacteroidia|o__Bacteroidales|f__Bacteroidaceae|g__Bacteroides|s__Bacteroides_pyogenes	s__Bacteroides_pyogenes	S	2.09536e-06	0.000190078	0	0	0	0	0.0172427	0.000121521
k__Bacteria|p__Bacteroidetes|c__Bacteroidia|o__Bacteroidales|f__Bacteroidaceae|g__Bacteroides|s__Bacteroides_sp_2_1_16	s__Bacteroides_sp_2_1_16	S	7.20262e-06	0.000653378	0	0	0	0	0.0592704	0.000121521
k__Bacteria|p__Bacteroidetes|c__Bacteroidia|o__Bacteroidales|f__Bacteroidaceae|g__Bacteroides|s__Bacteroides_sp_3_1_40A	s__Bacteroides_sp_3_1_40A	S	3.87879e-06	0.00035186	0	0	0	0	0.0319186	0.000121521
k__Bacteria|p__Bacteroidetes|c__Bacteroidia|o__Bacteroidales|f__Bacteroidaceae|g__Bacteroides|s__Bacteroides_sp_D2	s__Bacteroides_sp_D2	S	1.59127e-06	0.000144351	0	0	0	0	0.0130946	0.000121521
k__Bacteria|p__Bacteroidetes|c__Bacteroidetes_noname|o__Bacteroidetes_noname|f__Bacteroidetes_noname|g__Bacteroidetes_noname|s__Bacteroidetes_bacterium_oral_taxon_272	s__Bacteroidetes_bacterium_oral_taxon_272	S	5.27889e-08	4.78869e-06	0	0	0	0	0.0004344	0.000121521
k__Bacteria|p__Proteobacteria|c__Betaproteobacteria|o__Burkholderiales|f__Alcaligenaceae|g__Bordetella|s__Bordetella_unclassified	s__Bordetella_unclassified	S	3.5703e-08	3.23876e-06	0	0	0	0	0.0002938	0.000121521
k__Bacteria|p__Actinobacteria|c__Actinobacteria|o__Actinomycetales|f__Brevibacteriaceae|g__Brevibacterium|s__Brevibacterium_linens	s__Brevibacterium_linens	S	1.04326e-07	9.46383e-06	0	0	0	0	0.0008585	0.000121521
k__Bacteria|p__Firmicutes|c__Erysipelotrichia|o__Erysipelotrichales|f__Erysipelotrichaceae|g__Bulleidia|s__Bulleidia_extructa	s__Bulleidia_extructa	S	7.23053e-09	6.55909e-07	0	0	0	0	5.95e-05	0.000121521
k__Bacteria|p__Proteobacteria|c__Epsilonproteobacteria|o__Campylobacterales|f__Campylobacteraceae|g__Campylobacter|s__Campylobacter_fetus	s__Campylobacter_fetus	S	1.40442e-07	1.27401e-05	0	0	0	0	0.0011557	0.000121521
k__Bacteria|p__Proteobacteria|c__Epsilonproteobacteria|o__Campylobacterales|f__Campylobacteraceae|g__Campylobacter|s__Campylobacter_ureolyticus	s__Campylobacter_ureolyticus	S	2.332e-08	2.11544e-06	0	0	0	0	0.0001919	0.000121521
k__Eukaryota|p__Ascomycota|c__Saccharomycetes|o__Saccharomycetales|f__Saccharomycetales_noname|g__Candida|s__Candida_unclassified	s__Candida_unclassified	S	5.88164e-09	5.33546e-07	0	0	0	0	4.84e-05	0.000121521
k__Bacteria|p__Fusobacteria|c__Fusobacteriia|o__Fusobacteriales|f__Fusobacteriaceae|g__Cetobacterium|s__Cetobacterium_somerae	s__Cetobacterium_somerae	S	6.82464e-08	6.1909e-06	0	0	0	0	0.0005616	0.000121521
k__Viruses|p__Viruses_noname|c__Viruses_noname|o__Viruses_noname|f__Flaviviridae|g__Pestivirus|s__Classical_swine_fever_virus	s__Classical_swine_fever_virus	S	1.57492e-08	1.42867e-06	0	0	0	0	0.0001296	0.000121521
k__Bacteria|p__Firmicutes|c__Clostridia|o__Clostridiales|f__Clostridiaceae|g__Clostridium|s__Clostridium_phytofermentans	s__Clostridium_phytofermentans	S	2.02455e-08	1.83654e-06	0	0	0	0	0.0001666	0.000121521
k__Bacteria|p__Firmicutes|c__Clostridia|o__Clostridiales|f__Clostridiaceae|g__Clostridium|s__Clostridium_sp_KLE_1755	s__Clostridium_sp_KLE_1755	S	1.95675e-06	0.000177504	0	0	0	0	0.0161021	0.000121521
k__Bacteria|p__Actinobacteria|c__Actinobacteria|o__Actinomycetales|f__Corynebacteriaceae|g__Corynebacterium|s__Corynebacterium_accolens	s__Corynebacterium_accolens	S	8.52594e-08	7.73421e-06	0	0	0	0	0.0007016	0.000121521
k__Bacteria|p__Actinobacteria|c__Actinobacteria|o__Actinomycetales|f__Corynebacteriaceae|g__Corynebacterium|s__Corynebacterium_amycolatum	s__Corynebacterium_amycolatum	S	3.80362e-09	3.45041e-07	0	0	0	0	3.13e-05	0.000121521
k__Bacteria|p__Actinobacteria|c__Actinobacteria|o__Actinomycetales|f__Corynebacteriaceae|g__Corynebacterium|s__Corynebacterium_durum	s__Corynebacterium_durum	S	1.37319e-09	1.24568e-07	0	0	0	0	1.13e-05	0.000121521
k__Bacteria|p__Actinobacteria|c__Actinobacteria|o__Actinomycetales|f__Corynebacteriaceae|g__Corynebacterium|s__Corynebacterium_variabile	s__Corynebacterium_variabile	S	1.58464e-08	1.43749e-06	0	0	0	0	0.0001304	0.000121521
k__Viruses|p__Viruses_noname|c__Viruses_noname|o__Caudovirales|f__Siphoviridae|g__Tunalikevirus|s__Cronobacter_phage_ESP2949_1	s__Cronobacter_phage_ESP2949_1	S	1.91767e-06	0.000173959	0	0	0	0	0.0157805	0.000121521
k__Bacteria|p__Proteobacteria|c__Gammaproteobacteria|o__Enterobacteriales|f__Enterobacteriaceae|g__Cronobacter|s__Cronobacter_turicensis	s__Cronobacter_turicensis	S	2.10791e-07	1.91217e-05	0	0	0	0	0.0017346	0.000121521
k__Eukaryota|p__Basidiomycota|c__Tremellomycetes|o__Tremellales|f__Tremellaceae|g__Filobasidiella|s__Cryptococcus_neoformans	s__Cryptococcus_neoformans	S	2.81565e-08	2.55419e-06	0	0	0	0	0.0002317	0.000121521
k__Bacteria|p__Deinococcus_Thermus|c__Deinococci|o__Deinococcales|f__Deinococcaceae|g__Deinococcus|s__Deinococcus_unclassified	s__Deinococcus_unclassified	S	2.67469e-08	2.42631e-06	0	0	0	0	0.0002201	0.000121521
k__Bacteria|p__Proteobacteria|c__Betaproteobacteria|o__Burkholderiales|f__Comamonadaceae|g__Delftia|s__Delftia_acidovorans	s__Delftia_acidovorans	S	3.34184e-09	3.03151e-07	0	0	0	0	2.75e-05	0.000121521
k__Bacteria|p__Bacteroidetes|c__Bacteroidia|o__Bacteroidales|f__Porphyromonadaceae|g__Dysgonomonas|s__Dysgonomonas_mossii	s__Dysgonomonas_mossii	S	1.91724e-07	1.73921e-05	0	0	0	0	0.0015777	0.000121521
k__Bacteria|p__Proteobacteria|c__Gammaproteobacteria|o__Enterobacteriales|f__Enterobacteriaceae|g__Enterobacter|s__Enterobacter_cancerogenus	s__Enterobacter_cancerogenus	S	7.57079e-09	6.86775e-07	0	0	0	0	6.23e-05	0.000121521
k__Viruses|p__Viruses_noname|c__Viruses_noname|o__Viruses_noname|f__Viruses_noname|g__Viruses_noname|s__Enterobacteria_phage_HK544	s__Enterobacteria_phage_HK544	S	4.26443e-07	3.86843e-05	0	0	0	0	0.0035092	0.000121521
k__Viruses|p__Viruses_noname|c__Viruses_noname|o__Caudovirales|f__Siphoviridae|g__Lambdalikevirus|s__Enterobacteria_phage_HK633	s__Enterobacteria_phage_HK633	S	4.00996e-07	3.63759e-05	0	0	0	0	0.0032998	0.000121521
k__Viruses|p__Viruses_noname|c__Viruses_noname|o__Caudovirales|f__Podoviridae|g__Podoviridae_noname|s__Enterobacteria_phage_IME10	s__Enterobacteria_phage_IME10	S	1.46373e-07	1.3278e-05	0	0	0	0	0.0012045	0.000121521
k__Viruses|p__Viruses_noname|c__Viruses_noname|o__Caudovirales|f__Siphoviridae|g__Siphoviridae_noname|s__Enterobacteria_phage_JL1	s__Enterobacteria_phage_JL1	S	5.12147e-05	0.00464588	0	0	0	0	0.421446	0.000121521
k__Viruses|p__Viruses_noname|c__Viruses_noname|o__Caudovirales|f__Podoviridae|g__Sp6likevirus|s__Enterobacteria_phage_K1_5	s__Enterobacteria_phage_K1_5	S	2.0158e-07	1.82861e-05	0	0	0	0	0.0016588	0.000121521
k__Viruses|p__Viruses_noname|c__Viruses_noname|o__Caudovirales|f__Siphoviridae|g__Lambdalikevirus|s__Enterobacteria_phage_mEpX1	s__Enterobacteria_phage_mEpX1	S	8.09843e-07	7.3464e-05	0	0	0	0	0.0066642	0.000121521
k__Viruses|p__Viruses_noname|c__Viruses_noname|o__Caudovirales|f__Podoviridae|g__Podoviridae_noname|s__Enterobacteria_phage_Min27	s__Enterobacteria_phage_Min27	S	3.26601e-07	2.96272e-05	0	0	0	0	0.0026876	0.000121521
k__Viruses|p__Viruses_noname|c__Viruses_noname|o__Caudovirales|f__Myoviridae|g__P2likeviruses|s__Enterobacteria_phage_P4	s__Enterobacteria_phage_P4	S	7.80544e-07	7.08062e-05	0	0	0	0	0.0064231	0.000121521
k__Viruses|p__Viruses_noname|c__Viruses_noname|o__Caudovirales|f__Myoviridae|g__Myoviridae_noname|s__Enterobacteria_phage_phiP27	s__Enterobacteria_phage_phiP27	S	2.55494e-06	0.000231768	0	0	0	0	0.0210246	0.000121521
k__Viruses|p__Viruses_noname|c__Viruses_noname|o__Caudovirales|f__Myoviridae|g__T4likevirus|s__Enterobacteria_phage_RB69	s__Enterobacteria_phage_RB69	S	4.29157e-06	0.000389304	0	0	0	0	0.0353153	0.000121521
k__Viruses|p__Viruses_noname|c__Viruses_noname|o__Caudovirales|f__Myoviridae|g__Myoviridae_noname|s__Enterobacteria_phage_SfV	s__Enterobacteria_phage_SfV	S	3.2569e-07	2.95446e-05	0	0	0	0	0.0026801	0.000121521
k__Viruses|p__Viruses_noname|c__Viruses_noname|o__Viruses_noname|f__Microviridae|g__Microvirus|s__Enterobacteria_phage_WA13_sensu_lato	s__Enterobacteria_phage_WA13_sensu_lato	S	4.26467e-07	3.86865e-05	0	0	0	0	0.0035094	0.000121521
k__Bacteria|p__Firmicutes|c__Bacilli|o__Lactobacillales|f__Enterococcaceae|g__Enterococcus|s__Enterococcus_dispar	s__Enterococcus_dispar	S	5.04314e-09	4.57483e-07	0	0	0	0	4.15e-05	0.000121521
k__Bacteria|p__Firmicutes|c__Bacilli|o__Lactobacillales|f__Enterococcaceae|g__Enterococcus|s__Enterococcus_durans	s__Enterococcus_durans	S	5.37003e-08	4.87136e-06	0	0	0	0	0.0004419	0.000121521
k__Bacteria|p__Firmicutes|c__Bacilli|o__Lactobacillales|f__Enterococcaceae|g__Enterococcus|s__Enterococcus_gallinarum	s__Enterococcus_gallinarum	S	1.61745e-08	1.46725e-06	0	0	0	0	0.0001331	0.000121521
k__Bacteria|p__Proteobacteria|c__Gammaproteobacteria|o__Enterobacteriales|f__Enterobacteriaceae|g__Escherichia|s__Escherichia_albertii	s__Escherichia_albertii	S	5.83911e-08	5.29688e-06	0	0	0	0	0.0004805	0.000121521
k__Bacteria|p__Proteobacteria|c__Gammaproteobacteria|o__Enterobacteriales|f__Enterobacteriaceae|g__Escherichia|s__Escherichia_sp_TW09276	s__Escherichia_sp_TW09276	S	3.65083e-05	0.0033118	0	0	0	0	0.300426	0.000121521
k__Bacteria|p__Firmicutes|c__Bacilli|o__Bacillales|f__Bacillales_noname|g__Exiguobacterium|s__Exiguobacterium_unclassified	s__Exiguobacterium_unclassified	S	6.52692e-08	5.92082e-06	0	0	0	0	0.0005371	0.000121521
k__Bacteria|p__Synergistetes|c__Synergistia|o__Synergistales|f__Synergistaceae|g__Fretibacterium|s__Fretibacterium_fastidiosum	s__Fretibacterium_fastidiosum	S	1.59558e-08	1.44741e-06	0	0	0	0	0.0001313	0.000121521
k__Bacteria|p__Fusobacteria|c__Fusobacteriia|o__Fusobacteriales|f__Fusobacteriaceae|g__Fusobacterium|s__Fusobacterium_varium	s__Fusobacterium_varium	S	1.16964e-07	1.06103e-05	0	0	0	0	0.0009625	0.000121521
k__Bacteria|p__Firmicutes|c__Bacilli|o__Bacillales|f__Bacillales_noname|g__Gemella|s__Gemella_haemolysans	s__Gemella_haemolysans	S	3.07449e-09	2.78899e-07	0	0	0	0	2.53e-05	0.000121521
k__Bacteria|p__Firmicutes|c__Bacilli|o__Bacillales|f__Bacillales_noname|g__Gemella|s__Gemella_morbillorum	s__Gemella_morbillorum	S	7.29129e-09	6.61421e-07	0	0	0	0	6e-05	0.000121521
k__Bacteria|p__Firmicutes|c__Bacilli|o__Bacillales|f__Bacillales_noname|g__Gemella|s__Gemella_unclassified	s__Gemella_unclassified	S	1.45826e-09	1.32284e-07	0	0	0	0	1.2e-05	0.000121521
k__Viruses|p__Viruses_noname|c__Viruses_noname|o__Viruses_noname|f__Circoviridae|g__Gyrovirus|s__Gyrovirus_4	s__Gyrovirus_4	S	4.81711e-08	4.36979e-06	0	0	0	0	0.0003964	0.000121521
k__Bacteria|p__Proteobacteria|c__Gammaproteobacteria|o__Pasteurellales|f__Pasteurellaceae|g__Haemophilus|s__Haemophilus_parahaemolyticus	s__Haemophilus_parahaemolyticus	S	1.28813e-08	1.16851e-06	0	0	0	0	0.000106	0.000121521
k__Viruses|p__Viruses_noname|c__Viruses_noname|o__Caudovirales|f__Myoviridae|g__Mulikevirus|s__Haemophilus_phage_SuMu	s__Haemophilus_phage_SuMu	S	6.60485e-06	0.000599151	0	0	0	0	0.0543513	0.000121521
k__Archaea|p__Euryarchaeota|c__Halobacteria|o__Halobacteriales|f__Halobacteriaceae|g__Halobacterium|s__Halobacterium_unclassified	s__Halobacterium_unclassified	S	8.05687e-09	7.3087e-07	0	0	0	0	6.63e-05	0.000121521
k__Archaea|p__Euryarchaeota|c__Halobacteria|o__Halobacteriales|f__Halobacteriaceae|g__Halococcus|s__Halococcus_unclassified	s__Halococcus_unclassified	S	4.56921e-09	4.1449e-07	0	0	0	0	3.76e-05	0.000121521
k__Archaea|p__Euryarchaeota|c__Halobacteria|o__Halobacteriales|f__Halobacteriaceae|g__Halonotius|s__Halonotius_unclassified	s__Halonotius_unclassified	S	2.38182e-08	2.16064e-06	0	0	0	0	0.000196	0.000121521
k__Bacteria|p__Proteobacteria|c__Epsilonproteobacteria|o__Campylobacterales|f__Helicobacteraceae|g__Helicobacter|s__Helicobacter_bilis	s__Helicobacter_bilis	S	6.4054e-08	5.81058e-06	0	0	0	0	0.0005271	0.000121521
k__Bacteria|p__Proteobacteria|c__Epsilonproteobacteria|o__Campylobacterales|f__Helicobacteraceae|g__Helicobacter|s__Helicobacter_pullorum	s__Helicobacter_pullorum	S	3.43906e-09	3.1197e-07	0	0	0	0	2.83e-05	0.000121521
k__Viruses|p__Viruses_noname|c__Viruses_noname|o__Viruses_noname|f__Adenoviridae|g__Mastadenovirus|s__Human_adenovirus_E	s__Human_adenovirus_E	S	5.10196e-07	4.62818e-05	0	0	0	0	0.0041984	0.000121521
k__Viruses|p__Viruses_noname|c__Viruses_noname|o__Viruses_noname|f__Adenoviridae|g__Mastadenovirus|s__Human_adenovirus_F	s__Human_adenovirus_F	S	1.13725e-06	0.000103164	0	0	0	0	0.0093584	0.000121521
k__Viruses|p__Viruses_noname|c__Viruses_noname|o__Viruses_noname|f__Parvoviridae|g__Bocavirus|s__Human_bocavirus_2	s__Human_bocavirus_2	S	4.14522e-07	3.76029e-05	0	0	0	0	0.0034111	0.000121521
k__Viruses|p__Viruses_noname|c__Viruses_noname|o__Herpesvirales|f__Herpesviridae|g__Simplexvirus|s__Human_herpesvirus_1	s__Human_herpesvirus_1	S	1.29262e-07	1.17259e-05	0	0	0	0	0.0010637	0.000121521
k__Bacteria|p__Proteobacteria|c__Gammaproteobacteria|o__Enterobacteriales|f__Enterobacteriaceae|g__Klebsiella|s__Klebsiella_sp_MS_92_3	s__Klebsiella_sp_MS_92_3	S	5.6598e-06	0.000513422	0	0	0	0	0.0465745	0.000121521
k__Bacteria|p__Actinobacteria|c__Actinobacteria|o__Actinomycetales|f__Micrococcaceae|g__Kocuria|s__Kocuria_rhizophila	s__Kocuria_rhizophila	S	3.05991e-08	2.77576e-06	0	0	0	0	0.0002518	0.000121521
k__Bacteria|p__Actinobacteria|c__Actinobacteria|o__Actinomycetales|f__Micrococcaceae|g__Kocuria|s__Kocuria_unclassified	s__Kocuria_unclassified	S	2.36116e-08	2.1419e-06	0	0	0	0	0.0001943	0.000121521
k__Bacteria|p__Firmicutes|c__Bacilli|o__Lactobacillales|f__Lactobacillaceae|g__Lactobacillus|s__Lactobacillus_curvatus	s__Lactobacillus_curvatus	S	9.35715e-10	8.48823e-08	0	0	0	0	7.7e-06	0.000121521
k__Bacteria|p__Firmicutes|c__Bacilli|o__Lactobacillales|f__Lactobacillaceae|g__Lactobacillus|s__Lactobacillus_helveticus	s__Lactobacillus_helveticus	S	1.90801e-07	1.73083e-05	0	0	0	0	0.0015701	0.000121521
k__Viruses|p__Viruses_noname|c__Viruses_noname|o__Caudovirales|f__Siphoviridae|g__C2likevirus|s__Lactococcus_phage_bIL67	s__Lactococcus_phage_bIL67	S	5.54211e-07	5.02746e-05	0	0	0	0	0.0045606	0.000121521
k__Viruses|p__Viruses_noname|c__Viruses_noname|o__Caudovirales|f__Siphoviridae|g__Siphoviridae_noname|s__Lactococcus_phage_BM13	s__Lactococcus_phage_BM13	S	1.88973e-06	0.000171425	0	0	0	0	0.0155506	0.000121521
k__Viruses|p__Viruses_noname|c__Viruses_noname|o__Caudovirales|f__Siphoviridae|g__Siphoviridae_noname|s__Lactococcus_phage_P335_sensu_lato	s__Lactococcus_phage_P335_sensu_lato	S	6.50427e-06	0.000590027	0	0	0	0	0.0535236	0.000121521
k__Viruses|p__Viruses_noname|c__Viruses_noname|o__Caudovirales|f__Siphoviridae|g__Siphoviridae_noname|s__Lactococcus_phage_ul36	s__Lactococcus_phage_ul36	S	2.1542e-06	0.000195416	0	0	0	0	0.0177269	0.000121521
k__Eukaryota|p__Eukaryota_noname|c__Eukaryota_noname|o__Kinetoplastida|f__Trypanosomatidae|g__Leishmania|s__Leishmania_braziliensis	s__Leishmania_braziliensis	S	2.28691e-07	2.07455e-05	0	0	0	0	0.0018819	0.000121521
k__Eukaryota|p__Eukaryota_noname|c__Eukaryota_noname|o__Kinetoplastida|f__Trypanosomatidae|g__Leishmania|s__Leishmania_infantum	s__Leishmania_infantum	S	3.57273e-09	3.24096e-07	0	0	0	0	2.94e-05	0.000121521
k__Bacteria|p__Firmicutes|c__Bacilli|o__Lactobacillales|f__Leuconostocaceae|g__Leuconostoc|s__Leuconostoc_gasicomitatum	s__Leuconostoc_gasicomitatum	S	4.41123e-09	4.00159e-07	0	0	0	0	3.63e-05	0.000121521
k__Bacteria|p__Firmicutes|c__Bacilli|o__Lactobacillales|f__Leuconostocaceae|g__Leuconostoc|s__Leuconostoc_gelidum	s__Leuconostoc_gelidum	S	3.79755e-08	3.4449e-06	0	0	0	0	0.0003125	0.000121521
k__Bacteria|p__Firmicutes|c__Bacilli|o__Bacillales|f__Bacillaceae|g__Lysinibacillus|s__Lysinibacillus_sphaericus	s__Lysinibacillus_sphaericus	S	1.33066e-08	1.20709e-06	0	0	0	0	0.0001095	0.000121521
k__Bacteria|p__Firmicutes|c__Negativicutes|o__Selenomonadales|f__Veillonellaceae|g__Megasphaera|s__Megasphaera_genomosp_type_1	s__Megasphaera_genomosp_type_1	S	2.11569e-08	1.91922e-06	0	0	0	0	0.0001741	0.000121521
k__Bacteria|p__Firmicutes|c__Negativicutes|o__Selenomonadales|f__Veillonellaceae|g__Megasphaera|s__Megasphaera_sp_BV3C16_1	s__Megasphaera_sp_BV3C16_1	S	7.35217e-07	6.66943e-05	0	0	0	0	0.0060501	0.000121521
k__Archaea|p__Euryarchaeota|c__Methanomicrobia|o__Methanomicrobiales|f__Methanomicrobiaceae|g__Methanoculleus|s__Methanoculleus_unclassified	s__Methanoculleus_unclassified	S	3.71187e-07	3.36718e-05	0	0	0	0	0.0030545	0.000121521
k__Archaea|p__Euryarchaeota|c__Methanomicrobia|o__Methanomicrobiales|f__Methanomicrobiaceae|g__Methanofollis|s__Methanofollis_liminatans	s__Methanofollis_liminatans	S	8.38498e-10	7.60634e-08	0	0	0	0	6.9e-06	0.000121521
k__Archaea|p__Euryarchaeota|c__Methanobacteria|o__Methanobacteriales|f__Methanobacteriaceae|g__Methanosphaera|s__Methanosphaera_stadtmanae	s__Methanosphaera_stadtmanae	S	3.99198e-08	3.62128e-06	0	0	0	0	0.0003285	0.000121521
k__Bacteria|p__Actinobacteria|c__Actinobacteria|o__Actinomycetales|f__Actinomycetaceae|g__Mobiluncus|s__Mobiluncus_unclassified	s__Mobiluncus_unclassified	S	1.08033e-08	9.80005e-07	0	0	0	0	8.89e-05	0.000121521
k__Bacteria|p__Deferribacteres|c__Deferribacteres|o__Deferribacterales|f__Deferribacteraceae|g__Mucispirillum|s__Mucispirillum_schaedleri	s__Mucispirillum_schaedleri	S	9.77032e-09	8.86304e-07	0	0	0	0	8.04e-05	0.000121521
k__Bacteria|p__Tenericutes|c__Mollicutes|o__Mycoplasmatales|f__Mycoplasmataceae|g__Mycoplasma|s__Mycoplasma_bovis	s__Mycoplasma_bovis	S	1.41937e-08	1.28757e-06	0	0	0	0	0.0001168	0.000121521
k__Bacteria|p__Tenericutes|c__Mollicutes|o__Mycoplasmatales|f__Mycoplasmataceae|g__Mycoplasma|s__Mycoplasma_fermentans	s__Mycoplasma_fermentans	S	7.27913e-09	6.60318e-07	0	0	0	0	5.99e-05	0.000121521
k__Bacteria|p__Tenericutes|c__Mollicutes|o__Mycoplasmatales|f__Mycoplasmataceae|g__Mycoplasma|s__Mycoplasma_penetrans	s__Mycoplasma_penetrans	S	2.46689e-09	2.23781e-07	0	0	0	0	2.03e-05	0.000121521
k__Bacteria|p__Proteobacteria|c__Betaproteobacteria|o__Neisseriales|f__Neisseriaceae|g__Neisseria|s__Neisseria_bacilliformis	s__Neisseria_bacilliformis	S	8.34852e-09	7.57327e-07	0	0	0	0	6.87e-05	0.000121521
k__Bacteria|p__Proteobacteria|c__Betaproteobacteria|o__Neisseriales|f__Neisseriaceae|g__Neisseria|s__Neisseria_subflava	s__Neisseria_subflava	S	8.62802e-09	7.82681e-07	0	0	0	0	7.1e-05	0.000121521
k__Viruses|p__Viruses_noname|c__Viruses_noname|o__Viruses_noname|f__Viruses_noname|g__Viruses_noname|s__Nora_virus	s__Nora_virus	S	3.30538e-08	2.99844e-06	0	0	0	0	0.000272	0.000121521
k__Bacteria|p__Proteobacteria|c__Gammaproteobacteria|o__Enterobacteriales|f__Enterobacteriaceae|g__Pantoea|s__Pantoea_dispersa	s__Pantoea_dispersa	S	4.09588e-07	3.71553e-05	0	0	0	0	0.0033705	0.000121521
k__Bacteria|p__Proteobacteria|c__Alphaproteobacteria|o__Rhodobacterales|f__Rhodobacteraceae|g__Paracoccus|s__Paracoccus_unclassified	s__Paracoccus_unclassified	S	6.33127e-09	5.74334e-07	0	0	0	0	5.21e-05	0.000121521
k__Bacteria|p__Proteobacteria|c__Alphaproteobacteria|o__Rhizobiales|f__Rhodobiaceae|g__Parvibaculum|s__Parvibaculum_lavamentivorans	s__Parvibaculum_lavamentivorans	S	3.90084e-09	3.5386e-07	0	0	0	0	3.21e-05	0.000121521
k__Bacteria|p__Firmicutes|c__Clostridia|o__Clostridiales|f__Clostridiales_Family_XI_Incertae_Sedis|g__Parvimonas|s__Parvimonas_micra	s__Parvimonas_micra	S	6.41633e-09	5.8205e-07	0	0	0	0	5.28e-05	0.000121521
k__Bacteria|p__Firmicutes|c__Bacilli|o__Lactobacillales|f__Lactobacillaceae|g__Pediococcus|s__Pediococcus_acidilactici	s__Pediococcus_acidilactici	S	1.03451e-07	9.38446e-06	0	0	0	0	0.0008513	0.000121521
k__Bacteria|p__Firmicutes|c__Bacilli|o__Lactobacillales|f__Lactobacillaceae|g__Pediococcus|s__Pediococcus_lolii	s__Pediococcus_lolii	S	2.43529e-08	2.20914e-06	0	0	0	0	0.0002004	0.000121521
k__Bacteria|p__Firmicutes|c__Bacilli|o__Lactobacillales|f__Lactobacillaceae|g__Pediococcus|s__Pediococcus_unclassified	s__Pediococcus_unclassified	S	1.54575e-08	1.40221e-06	0	0	0	0	0.0001272	0.000121521
k__Eukaryota|p__Ascomycota|c__Eurotiomycetes|o__Eurotiales|f__Aspergillaceae|g__Penicillium|s__Penicillium_chrysogenum	s__Penicillium_chrysogenum	S	4.30186e-09	3.90238e-07	0	0	0	0	3.54e-05	0.000121521
k__Bacteria|p__Firmicutes|c__Clostridia|o__Clostridiales|f__Peptostreptococcaceae|g__Peptostreptococcus|s__Peptostreptococcus_stomatis	s__Peptostreptococcus_stomatis	S	2.53737e-08	2.30174e-06	0	0	0	0	0.0002088	0.000121521
k__Bacteria|p__Firmicutes|c__Clostridia|o__Clostridiales|f__Peptostreptococcaceae|g__Peptostreptococcus|s__Peptostreptococcus_unclassified	s__Peptostreptococcus_unclassified	S	2.50334e-09	2.27088e-07	0	0	0	0	2.06e-05	0.000121521
k__Bacteria|p__Bacteroidetes|c__Bacteroidia|o__Bacteroidales|f__Prevotellaceae|g__Prevotella|s__Prevotella_veroralis	s__Prevotella_veroralis	S	1.42861e-07	1.29594e-05	0	0	0	0	0.0011756	0.000121521
k__Bacteria|p__Actinobacteria|c__Actinobacteria|o__Actinomycetales|f__Propionibacteriaceae|g__Propionibacterium|s__Propionibacterium_avidum	s__Propionibacterium_avidum	S	6.8052e-10	6.17326e-08	0	0	0	0	5.6e-06	0.000121521
k__Bacteria|p__Proteobacteria|c__Gammaproteobacteria|o__Enterobacteriales|f__Enterobacteriaceae|g__Proteus|s__Proteus_penneri	s__Proteus_penneri	S	4.22044e-08	3.82852e-06	0	0	0	0	0.0003473	0.000121521
k__Bacteria|p__Proteobacteria|c__Gammaproteobacteria|o__Enterobacteriales|f__Enterobacteriaceae|g__Providencia|s__Providencia_rettgeri	s__Providencia_rettgeri	S	2.45473e-08	2.22678e-06	0	0	0	0	0.000202	0.000121521
k__Bacteria|p__Proteobacteria|c__Gammaproteobacteria|o__Enterobacteriales|f__Enterobacteriaceae|g__Providencia|s__Providencia_rustigianii	s__Providencia_rustigianii	S	5.60821e-08	5.08743e-06	0	0	0	0	0.0004615	0.000121521
k__Bacteria|p__Proteobacteria|c__Gammaproteobacteria|o__Alteromonadales|f__Pseudoalteromonadaceae|g__Pseudoalteromonas|s__Pseudoalteromonas_flavipulchra	s__Pseudoalteromonas_flavipulchra	S	2.8436e-09	2.57954e-07	0	0	0	0	2.34e-05	0.000121521
k__Bacteria|p__Proteobacteria|c__Gammaproteobacteria|o__Pseudomonadales|f__Pseudomonadaceae|g__Pseudomonas|s__Pseudomonas_alcaligenes	s__Pseudomonas_alcaligenes	S	7.03609e-09	6.38271e-07	0	0	0	0	5.79e-05	0.000121521
k__Viruses|p__Viruses_noname|c__Viruses_noname|o__Caudovirales|f__Podoviridae|g__Podoviridae_noname|s__Pseudomonas_phage_F116	s__Pseudomonas_phage_F116	S	4.68599e-07	4.25084e-05	0	0	0	0	0.0038561	0.000121521
k__Viruses|p__Viruses_noname|c__Viruses_noname|o__Caudovirales|f__Siphoviridae|g__Lambdalikevirus|s__Pseudomonas_phage_MP38	s__Pseudomonas_phage_MP38	S	8.71856e-07	7.90894e-05	0	0	0	0	0.0071745	0.000121521
k__Viruses|p__Viruses_noname|c__Viruses_noname|o__Caudovirales|f__Myoviridae|g__Myoviridae_noname|s__Pseudomonas_phage_NH_4	s__Pseudomonas_phage_NH_4	S	1.88784e-07	1.71253e-05	0	0	0	0	0.0015535	0.000121521
k__Viruses|p__Viruses_noname|c__Viruses_noname|o__Caudovirales|f__Podoviridae|g__Phikmvlikevirus|s__Pseudomonas_phage_phi_2	s__Pseudomonas_phage_phi_2	S	4.77956e-07	4.33572e-05	0	0	0	0	0.0039331	0.000121521
k__Bacteria|p__Proteobacteria|c__Gammaproteobacteria|o__Pseudomonadales|f__Pseudomonadaceae|g__Pseudomonas|s__Pseudomonas_protegens	s__Pseudomonas_protegens	S	3.28959e-08	2.98411e-06	0	0	0	0	0.0002707	0.000121521
k__Bacteria|p__Firmicutes|c__Clostridia|o__Clostridiales|f__Eubacteriaceae|g__Pseudoramibacter|s__Pseudoramibacter_alactolyticus	s__Pseudoramibacter_alactolyticus	S	1.77421e-08	1.60946e-06	0	0	0	0	0.000146	0.000121521
k__Bacteria|p__Proteobacteria|c__Alphaproteobacteria|o__Rickettsiales|f__Rickettsiaceae|g__Rickettsia|s__Rickettsia_parkeri	s__Rickettsia_parkeri	S	9.21619e-08	8.36036e-06	0	0	0	0	0.0007584	0.000121521
k__Viruses|p__Viruses_noname|c__Viruses_noname|o__Herpesvirales|f__Herpesviridae|g__Roseolovirus|s__Roseolovirus_unclassified	s__Roseolovirus_unclassified	S	1.118e-09	1.01418e-07	0	0	0	0	9.2e-06	0.000121521
k__Bacteria|p__Actinobacteria|c__Actinobacteria|o__Rubrobacterales|f__Rubrobacteraceae|g__Rubrobacter|s__Rubrobacter_xylanophilus	s__Rubrobacter_xylanophilus	S	2.26516e-08	2.05481e-06	0	0	0	0	0.0001864	0.000121521
k__Viruses|p__Viruses_noname|c__Viruses_noname|o__Viruses_noname|f__Potyviridae|g__Potyvirus|s__Shallot_yellow_stripe_virus	s__Shallot_yellow_stripe_virus	S	2.3563e-08	2.13749e-06	0	0	0	0	0.0001939	0.000121521
k__Viruses|p__Viruses_noname|c__Viruses_noname|o__Caudovirales|f__Siphoviridae|g__Siphoviridae_noname|s__Shigella_phage_pSf_1	s__Shigella_phage_pSf_1	S	3.14559e-06	0.000285349	0	0	0	0	0.0258851	0.000121521
k__Bacteria|p__Firmicutes|c__Clostridia|o__Clostridiales|f__Lachnospiraceae|g__Shuttleworthia|s__Shuttleworthia_satelles	s__Shuttleworthia_satelles	S	1.035e-07	9.38887e-06	0	0	0	0	0.0008517	0.000121521
k__Bacteria|p__Firmicutes|c__Erysipelotrichia|o__Erysipelotrichales|f__Erysipelotrichaceae|g__Solobacterium|s__Solobacterium_moorei	s__Solobacterium_moorei	S	1.78637e-07	1.62048e-05	0	0	0	0	0.00147	0.000121521
k__Viruses|p__Viruses_noname|c__Viruses_noname|o__Viruses_noname|f__Viruses_noname|g__Viruses_noname|s__Southern_tomato_virus	s__Southern_tomato_virus	S	2.45595e-08	2.22789e-06	0	0	0	0	0.0002021	0.000121521
k__Bacteria|p__Proteobacteria|c__Alphaproteobacteria|o__Sphingomonadales|f__Sphingomonadaceae|g__Sphingobium|s__Sphingobium_unclassified	s__Sphingobium_unclassified	S	1.54575e-08	1.40221e-06	0	0	0	0	0.0001272	0.000121521
k__Bacteria|p__Firmicutes|c__Bacilli|o__Bacillales|f__Staphylococcaceae|g__Staphylococcus|s__Staphylococcus_caprae_capitis	s__Staphylococcus_caprae_capitis	S	7.43347e-08	6.74318e-06	0	0	0	0	0.0006117	0.000121521
k__Bacteria|p__Firmicutes|c__Bacilli|o__Bacillales|f__Staphylococcaceae|g__Staphylococcus|s__Staphylococcus_equorum	s__Staphylococcus_equorum	S	3.72585e-08	3.37986e-06	0	0	0	0	0.0003066	0.000121521
k__Bacteria|p__Firmicutes|c__Bacilli|o__Bacillales|f__Staphylococcaceae|g__Staphylococcus|s__Staphylococcus_warneri	s__Staphylococcus_warneri	S	1.78758e-08	1.62158e-06	0	0	0	0	0.0001471	0.000121521
k__Bacteria|p__Firmicutes|c__Bacilli|o__Lactobacillales|f__Streptococcaceae|g__Streptococcus|s__Streptococcus_agalactiae	s__Streptococcus_agalactiae	S	5.04436e-08	4.57593e-06	0	0	0	0	0.0004151	0.000121521
k__Bacteria|p__Firmicutes|c__Bacilli|o__Lactobacillales|f__Streptococcaceae|g__Streptococcus|s__Streptococcus_cristatus	s__Streptococcus_cristatus	S	6.42848e-09	5.83152e-07	0	0	0	0	5.29e-05	0.000121521
k__Bacteria|p__Firmicutes|c__Bacilli|o__Lactobacillales|f__Streptococcaceae|g__Streptococcus|s__Streptococcus_gallolyticus	s__Streptococcus_gallolyticus	S	4.31401e-09	3.91341e-07	0	0	0	0	3.55e-05	0.000121521
k__Bacteria|p__Firmicutes|c__Bacilli|o__Lactobacillales|f__Streptococcaceae|g__Streptococcus|s__Streptococcus_intermedius	s__Streptococcus_intermedius	S	4.89731e-09	4.44254e-07	0	0	0	0	4.03e-05	0.000121521
k__Bacteria|p__Firmicutes|c__Bacilli|o__Lactobacillales|f__Streptococcaceae|g__Streptococcus|s__Streptococcus_macedonicus	s__Streptococcus_macedonicus	S	8.85891e-09	8.03626e-07	0	0	0	0	7.29e-05	0.000121521
k__Bacteria|p__Firmicutes|c__Bacilli|o__Lactobacillales|f__Streptococcaceae|g__Streptococcus|s__Streptococcus_oligofermentans	s__Streptococcus_oligofermentans	S	2.75854e-09	2.50237e-07	0	0	0	0	2.27e-05	0.000121521
k__Bacteria|p__Firmicutes|c__Bacilli|o__Lactobacillales|f__Streptococcaceae|g__Streptococcus|s__Streptococcus_orisratti	s__Streptococcus_orisratti	S	1.13173e-07	1.02664e-05	0	0	0	0	0.0009313	0.000121521
k__Bacteria|p__Firmicutes|c__Bacilli|o__Lactobacillales|f__Streptococcaceae|g__Streptococcus|s__Streptococcus_suis	s__Streptococcus_suis	S	6.16065e-07	5.58856e-05	0	0	0	0	0.0050696	0.000121521
k__Bacteria|p__Thermotogae|c__Thermotogae|o__Thermotogales|f__Thermotogaceae|g__Thermosipho|s__Thermosipho_africanus	s__Thermosipho_africanus	S	3.71248e-08	3.36773e-06	0	0	0	0	0.0003055	0.000121521
k__Viruses|p__Viruses_noname|c__Viruses_noname|o__Viruses_noname|f__Caulimoviridae|g__Cavemovirus|s__Tobacco_vein_clearing_virus	s__Tobacco_vein_clearing_virus	S	5.82817e-08	5.28696e-06	0	0	0	0	0.0004796	0.000121521
k__Viruses|p__Viruses_noname|c__Viruses_noname|o__Viruses_noname|f__Anelloviridae|g__Kappatorquevirus|s__Torque_teno_sus_virus_k2	s__Torque_teno_sus_virus_k2	S	1.3117e-07	1.1899e-05	0	0	0	0	0.0010794	0.000121521
k__Viruses|p__Viruses_noname|c__Viruses_noname|o__Viruses_noname|f__Retroviridae|g__Alpharetrovirus|s__UR2_sarcoma_virus	s__UR2_sarcoma_virus	S	5.79657e-08	5.25829e-06	0	0	0	0	0.000477	0.000121521
k__Bacteria|p__Actinobacteria|c__Actinobacteria|o__Actinomycetales|f__Actinomycetaceae|g__Varibaculum|s__Varibaculum_cambriense	s__Varibaculum_cambriense	S	1.8532e-08	1.68111e-06	0	0	0	0	0.0001525	0.000121521
k__Bacteria|p__Proteobacteria|c__Gammaproteobacteria|o__Vibrionales|f__Vibrionaceae|g__Vibrio|s__Vibrio_vulnificus	s__Vibrio_vulnificus	S	4.67858e-09	4.24412e-07	0	0	0	0	3.85e-05	0.000121521
k__Bacteria|p__Proteobacteria|c__Epsilonproteobacteria|o__Campylobacterales|f__Helicobacteraceae|g__Wolinella|s__Wolinella_succinogenes	s__Wolinella_succinogenes	S	1.64054e-08	1.4882e-06	0	0	0	0	0.000135	0.000121521
k__Bacteria|p__Proteobacteria|c__Gammaproteobacteria|o__Enterobacteriales|f__Enterobacteriaceae|g__Yersinia|s__Yersinia_unclassified	s__Yersinia_unclassified	S	2.15944e-08	1.95891e-06	0	0	0	0	0.0001777	0.000121521
k__Viruses|p__Viruses_noname|c__Viruses_noname|o__Caudovirales|f__Siphoviridae|g__Yualikevirus|s__Yualikevirus_unclassified	s__Yualikevirus_unclassified	S	9.95868e-08	9.0339e-06	0	0	0	0	0.0008195	0.000121521
k__Viruses|p__Viruses_noname|c__Viruses_noname|o__Viruses_noname|f__Flaviviridae|g__Flavivirus|s__Zika_virus	s__Zika_virus	S	9.29639e-09	8.43311e-07	0	0	0	0	7.65e-05	0.000121521
k__Viruses|p__Viruses_noname|c__Viruses_noname|o__Viruses_noname|f__Potyviridae|g__Potyvirus|s__Zucchini_yellow_mosaic_virus	s__Zucchini_yellow_mosaic_virus	S	7.01154e-07	6.36044e-05	0	0	0	0	0.0057698	0.000121521
k__Bacteria|p__Proteobacteria|c__Gammaproteobacteria|o__Pseudomonadales|f__Moraxellaceae|g__Acinetobacter|s__Acinetobacter_guillouiae	s__Acinetobacter_guillouiae	S	0	0	0	0	0	0	0	0
k__Bacteria|p__Firmicutes|c__Clostridia|o__Clostridiales|f__Lachnospiraceae|g__Anaerostipes|s__Anaerostipes_caccae	s__Anaerostipes_caccae	S	0	0	0	0	0	0	0	0
k__Bacteria|p__Actinobacteria|c__Actinobacteria|o__Actinomycetales|f__Corynebacteriaceae|g__Corynebacterium|s__Corynebacterium_pseudogenitalium	s__Corynebacterium_pseudogenitalium	S	0	0	0	0	0	0	0	0
k__Bacteria|p__Deinococcus_Thermus|c__Deinococci|o__Deinococcales|f__Deinococcaceae|g__Deinococcus|s__Deinococcus_geothermalis	s__Deinococcus_geothermalis	S	0	0	0	0	0	0	0	0
k__Viruses|p__Viruses_noname|c__Viruses_noname|o__Viruses_noname|f__Microviridae|g__Microvirus|s__Enterobacteria_phage_G4_sensu_lato	s__Enterobacteria_phage_G4_sensu_lato	S	0	0	0	0	0	0	0	0
k__Viruses|p__Viruses_noname|c__Viruses_noname|o__Viruses_noname|f__Tectiviridae|g__Tectivirus|s__Enterobacteria_phage_PRD1	s__Enterobacteria_phage_PRD1	S	0	0	0	0	0	0	0	0
k__Viruses|p__Viruses_noname|c__Viruses_noname|o__Caudovirales|f__Podoviridae|g__T7likevirus|s__Enterobacteria_phage_T3	s__Enterobacteria_phage_T3	S	0	0	0	0	0	0	0	0
k__Eukaryota|p__Ascomycota|c__Saccharomycetes|o__Saccharomycetales|f__Saccharomycetaceae|g__Eremothecium|s__Eremothecium_unclassified	s__Eremothecium_unclassified	S	0	0	0	0	0	0	0	0
k__Viruses|p__Viruses_noname|c__Viruses_noname|o__Tymovirales|f__Alphaflexiviridae|g__Allexivirus|s__Garlic_virus_A	s__Garlic_virus_A	S	0	0	0	0	0	0	0	0
k__Viruses|p__Viruses_noname|c__Viruses_noname|o__Caudovirales|f__Podoviridae|g__Podoviridae_noname|s__Klebsiella_phage_KP34	s__Klebsiella_phage_KP34	S	0	0	0	0	0	0	0	0
k__Bacteria|p__Firmicutes|c__Clostridia|o__Clostridiales|f__Lachnospiraceae|g__Lachnospiraceae_noname|s__Lachnospiraceae_bacterium_4_1_37FAA	s__Lachnospiraceae_bacterium_4_1_37FAA	S	0	0	0	0	0	0	0	0
k__Viruses|p__Viruses_noname|c__Viruses_noname|o__Viruses_noname|f__Potyviridae|g__Potyvirus|s__Lettuce_mosaic_virus	s__Lettuce_mosaic_virus	S	0	0	0	0	0	0	0	0
k__Bacteria|p__Cyanobacteria|c__Cyanobacteria_noname|o__Oscillatoriales|f__Oscillatoriales_noname|g__Pseudanabaena|s__Pseudanabaena_unclassified	s__Pseudanabaena_unclassified	S	0	0	0	0	0	0	0	0
k__Viruses|p__Viruses_noname|c__Viruses_noname|o__Caudovirales|f__Siphoviridae|g__Siphoviridae_noname|s__Pseudomonas_phage_D3112	s__Pseudomonas_phage_D3112	S	0	0	0	0	0	0	0	0
k__Viruses|p__Viruses_noname|c__Viruses_noname|o__Viruses_noname|f__Totiviridae|g__Totivirus|s__Saccharomyces_cerevisiae_virus_L_A	s__Saccharomyces_cerevisiae_virus_L_A	S	0	0	0	0	0	0	0	0
k__Viruses|p__Viruses_noname|c__Viruses_noname|o__Tymovirales|f__Betaflexiviridae|g__Carlavirus|s__Shallot_latent_virus	s__Shallot_latent_virus	S	0	0	0	0	0	0	0	0
k__Viruses|p__Viruses_noname|c__Viruses_noname|o__Viruses_noname|f__Retroviridae|g__Gammaretrovirus|s__Spleen_focus_forming_virus	s__Spleen_focus_forming_virus	S	0	0	0	0	0	0	0	0
REFERENCES:
1)	Qin, J., Li, R., Raes, J. et al. A human gut microbial gene catalogue established by metagenomic sequencing. Nature 464, 59–65 (2010). https://doi.org/10.1038/nature08821
2)	T. Yatsunenko, F. E. Rey, M. J. Manary, I. Trehan, M. G. Dominguez-Bello, M. Contreras, M. Magris, G. Hidalgo, R. N. Baldassano, A. P. Anokhin, A. C. Heath, B. Warner, J. Reeder, J. Kuczynski, J. G. Caporaso, C. A. Lozupone, C. Lauber, J. C. Clemente, D. Knights, R. Knight, J. I. Gordon, Human gut microbiome viewed across age and geography. Nature 486, 222–227 (2012). pmid:22699611
3)	J. K. Goodrich, J. L. Waters, A. C. Poole, J. L. Sutter, O. Koren, R. Blekhman, M. Beaumont, W. Van Treuren, R. Knight, J. T. Bell, T. D. Spector, A. G. Clark, R. E. Ley, Human genetics shape the gut microbiome. Cell 159, 789–799 (2014). doi:10.1016/j.cell.2014.09.053 pmid:25417156
4)	A. Zhernakova et al., Population-based metagenomics analysis reveals markers for gut microbiome composition and diversity. Science 352, 565–569 (2016).
5)	P. J. Turnbaugh, R. E. Ley, M. Hamady, C. M. Fraser-Liggett, R. Knight, J. I. Gordon, The human microbiome project. Nature 449, 804–810 (2007). doi:10.1038/nature06244 pmid:17943116

## Sheet: S1B
Supplementary Table: Summary statistics of microbiome data (pathways)
Biochemical pathway (MetaCyc)	Mean.Ab	SD.Ab	Min.Ab	Q1.Ab	Median.Ab	Q3.Ab	Max.Ab	Prevalence	Bacterial_PWY
PWY.1042..glycolysis.IV..plant.cytosol.	0.0122666	0.00317942	0.000691274	0.0102907	0.0122143	0.0140175	0.035946	1	N
PWY.6385..peptidoglycan.biosynthesis.III..mycobacteria.	0.0102978	0.00269856	0.000897627	0.00853556	0.010199	0.0118578	0.026132	1	N
PWY.3841..folate.transformations.II	0.0090884	0.00353051	3.39678e-05	0.00653457	0.0087118	0.0111936	0.0293873	1	N
PWY.7357..thiamin.formation.from.pyrithiamine.and.oxythiamine..yeast.	0.00539753	0.00182262	0.000126385	0.00415064	0.0052832	0.00650715	0.0160776	1	N
PWY.6168..flavin.biosynthesis.III..fungi.	0.00509637	0.00181682	0	0.00381709	0.00504143	0.00631324	0.013446	0.998939	N
PWY.6124..inosine.5..phosphate.biosynthesis.II	0.00436961	0.00160485	0.000352148	0.00326522	0.00423377	0.00530702	0.0152005	1	N
PWY.7282..4.amino.2.methyl.5.phosphomethylpyrimidine.biosynthesis..yeast.	0.00394208	0.00143291	0	0.00301193	0.00393327	0.00480463	0.016216	0.998585	N
PWY.6527..stachyose.degradation	0.00360318	0.00164435	0	0.00250598	0.00342255	0.00448754	0.0193987	0.999882	N
ARGININE.SYN4.PWY..L.ornithine.de.novo..biosynthesis	0.00339225	0.00306809	0	0.00123066	0.00246708	0.00453736	0.0286396	0.998114	N
PWY.7242..D.fructuronate.degradation	0.00335544	0.0016376	5.35875e-05	0.00217285	0.00311975	0.00430147	0.0124116	1	N
THISYNARA.PWY..superpathway.of.thiamin.diphosphate.biosynthesis.III..eukaryotes.	0.00299204	0.00138255	6.08668e-05	0.00205936	0.0028224	0.00368147	0.0245382	1	N
PWY.6305..putrescine.biosynthesis.IV	0.0023558	0.00104258	0	0.00159517	0.00221279	0.00297513	0.00806003	0.999646	N
PWY.7539..6.hydroxymethyl.dihydropterin.diphosphate.biosynthesis.III..Chlamydia.	0.000843196	0.000656008	0	0.000428656	0.000711727	0.00108048	0.0106321	0.992808	N
PWY.6936..seleno.amino.acid.biosynthesis	0.000737658	0.000710791	0	0.000310136	0.000528855	0.000916209	0.0129988	0.996699	N
PWY.6606..guanosine.nucleotides.degradation.II	0.000610583	0.000373782	0	0.000324974	0.000570743	0.000846596	0.0036459	0.985499	N
PWYG.321..mycolate.biosynthesis	0.000577383	0.000662644	0	0.000199636	0.000398681	0.000705879	0.00832041	0.937986	N
PWY.5690..TCA.cycle.II..plants.and.fungi.	0.000513774	0.000553706	0	0.000174933	0.000362443	0.000655962	0.00551756	0.966282	N
PWY.6113..superpathway.of.mycolate.biosynthesis	0.000428993	0.000414645	0	0.000129662	0.000335257	0.000615435	0.00392174	0.81278	N
P185.PWY..formaldehyde.assimilation.III..dihydroxyacetone.cycle.	0.000412263	0.000333685	0	0.00018143	0.000344111	0.000560983	0.00364747	0.954138	N
PWY.7388..octanoyl..acyl.carrier.protein..biosynthesis..mitochondria..yeast.	0.000410034	0.000560918	0	0.000129913	0.000262367	0.000472257	0.00973386	0.93834	N
PWY4LZ.257..superpathway.of.fermentation..Chlamydomonas.reinhardtii.	0.000296892	0.000192876	0	0.00016866	0.000264398	0.000383157	0.00245378	0.981844	N
PWY.7235..superpathway.of.ubiquinol.6.biosynthesis..eukaryotic.	0.000287369	0.000416166	0	0	9.77259e-05	0.000425782	0.00492351	0.670832	N
PWY.4702..phytate.degradation.I	0.000242756	0.000428644	0	7.0262e-06	8.11169e-05	0.000287761	0.00747426	0.79651	N
PWY.821..superpathway.of.sulfur.amino.acid.biosynthesis..Saccharomyces.cerevisiae.	0.000199434	0.000268078	0	2.72434e-05	0.000120906	0.000269251	0.00320363	0.801108	N
PWY.5083..NAD.NADH.phosphorylation.and.dephosphorylation	0.000164485	0.000540221	0	0	1.42286e-05	7.32355e-05	0.007803	0.583707	N
PWY.7204..pyridoxal.5..phosphate.salvage.II..plants.	0.000153958	0.000441149	0	0	0	8.02345e-05	0.00486831	0.393657	N
PWY.5873..ubiquinol.7.biosynthesis..eukaryotic.	0.000151823	0.000307369	0	0	0	0.000165317	0.00492351	0.402617	N
PWY.7269..NAD.NADP.NADH.NADPH.mitochondrial.interconversion..yeast.	0.000101006	0.000403524	0	0	0	2.6274e-05	0.00467885	0.353454	N
COA.PWY.1..coenzyme.A.biosynthesis.II..mammalian.	0.0176022	0.00307923	0.00490165	0.0158507	0.0175522	0.0193767	0.0440063	1	N
PWY.4981..L.proline.biosynthesis.II..from.arginine.	0.00279589	0.0016072	0	0.00169723	0.00253597	0.00358343	0.0195845	0.999411	N
PWY.5030..L.histidine.degradation.III	0.002294	0.00129507	0	0.00135062	0.00212984	0.00303856	0.0114796	0.997406	N
PWY66.400..glycolysis.VI..metazoan.	0.00146047	0.00128104	0	0.000616281	0.00109624	0.00188284	0.014161	0.993162	N
PWY.6270..isoprene.biosynthesis.I	0.00141047	0.00172769	0	7.00912e-05	0.000704979	0.00219467	0.0140638	0.774817	N
PWY66.399..gluconeogenesis.III	0.00138509	0.000888413	0	0.000742872	0.00123772	0.00186813	0.00863132	0.984791	N
CITRULBIO.PWY..L.citrulline.biosynthesis	0.00121088	0.00104216	0	0.000492476	0.00092934	0.00160669	0.0128932	0.992219	N
PWY66.409..superpathway.of.purine.nucleotide.salvage	0.000623286	0.000825589	0	9.73672e-05	0.000388384	0.000772064	0.00581606	0.811012	N
PWY.6595..superpathway.of.guanosine.nucleotides.degradation..plants.	0.000559686	0.000411258	0	0.000224037	0.000525651	0.000825052	0.00422224	0.919359	N
PWY.5367..petroselinate.biosynthesis	0.000315203	0.000559534	0	4.14497e-05	0.000149143	0.000377318	0.0132114	0.86265	N
PWY.5723..Rubisco.shunt	0.000285322	0.000839119	0	0	0	0.000113899	0.0118024	0.431266	N
GLUDEG.I.PWY..GABA.shunt	0.000267839	0.000443113	0	1.46622e-05	8.64421e-05	0.000325276	0.00634874	0.804999	N
PWY.5871..ubiquinol.9.biosynthesis..eukaryotic.	0.000151823	0.000307369	0	0	0	0.000165317	0.00492351	0.402617	N
PWY.6803..phosphatidylcholine.acyl.editing	0.000100611	0.000361233	0	0	0	3.13135e-05	0.00666008	0.366187	N
PWY.6531..mannitol.cycle	0.000225221	0.000340042	0	3.73167e-05	0.000113422	0.000275287	0.0068467	0.882693	N
PWY.7383..anaerobic.energy.metabolism..invertebrates..cytosol.	0.0032177	0.00149877	0	0.00213971	0.00328908	0.00430684	0.00858183	0.997406	N
PWY.5863..superpathway.of.phylloquinol.biosynthesis	0.000113187	0.000300573	0	0	0	9.48426e-05	0.00423908	0.491629	N
PWY.7560..methylerythritol.phosphate.pathway.II	0.00126856	0.00156531	0	8.15898e-05	0.000623345	0.00194689	0.0127573	0.796392	N
CALVIN.PWY..Calvin.Benson.Bassham.cycle	0.0102962	0.00223448	0.000940522	0.00897381	0.0104496	0.0116883	0.0334268	1	N
ALLANTOINDEG.PWY..superpathway.of.allantoin.degradation.in.yeast	2.24075e-06	3.9043e-05	0	0	0	0	0.00326357	0.0431502	N
ERGOSTEROL.SYN.PWY..superpathway.of.ergosterol.biosynthesis.I	5.99189e-08	1.53527e-06	0	0	0	0	6.43259e-05	0.00176845	N
LYSINE.AMINOAD.PWY..L.lysine.biosynthesis.IV	3.46824e-09	1.97097e-07	0	0	0	0	1.50274e-05	0.00035369	N
PWY.5136..fatty.acid..beta..oxidation.II..peroxisome.	9.78951e-05	0.000223947	0	0	2.62993e-05	8.54195e-05	0.00257446	0.640651	N
PWY.4041...gamma..glutamyl.cycle	9.1586e-05	0.000405514	0	0	0	2.38117e-05	0.00671395	0.395426	N
PWY.561..superpathway.of.glyoxylate.cycle.and.fatty.acid.degradation	8.25071e-05	0.000271544	0	0	0	4.4228e-05	0.00327649	0.368545	N
PWY.7409..phospholipid.remodeling..phosphatidylethanolamine..yeast.	5.89265e-05	0.000277949	0	0	0	8.80088e-06	0.00432001	0.269394	N
PWY.5464..superpathway.of.cytosolic.glycolysis..plants...pyruvate.dehydrogenase.and.TCA.cycle	5.05522e-05	0.00011199	0	0	0	6.02696e-05	0.00206464	0.335888	N
PWY.6859..all.trans.farnesol.biosynthesis	4.71445e-05	0.000179555	0	0	0	1.69931e-05	0.00265521	0.320797	N
PWY.2723..trehalose.degradation.V	4.6901e-05	0.000192819	0	0	0	1.32263e-05	0.00257023	0.268333	N
PWY.7279..aerobic.respiration.II..cytochrome.c...yeast.	3.28263e-05	0.000184289	0	0	0	0	0.00619807	0.188163	N
P165.PWY..superpathway.of.purines.degradation.in.plants	2.25446e-08	9.09808e-07	0	0	0	0	6.32395e-05	0.000943174	N
PWY3O.19..ubiquinol.6.biosynthesis.from.4.hydroxybenzoate..eukaryotic.	2.64112e-05	0.000131533	0	0	0	0	0.00225196	0.0755718	N
PWY.6415..L.ascorbate.biosynthesis.V	2.22282e-05	6.54227e-05	0	0	0	0	0.000821549	0.230134	N
PWY.5138..unsaturated..even.numbered.fatty.acid..beta..oxidation	1.97158e-05	0.000111594	0	0	0	0	0.00348086	0.23037	N
PWY.7039..phosphatidate.metabolism..as.a.signaling.molecule	9.10348e-06	0.000102057	0	0	0	0	0.00259529	0.0543504	N
PWY.5004..superpathway.of.L.citrulline.metabolism	5.21201e-06	2.7208e-05	0	0	0	0	0.000544387	0.0629568	N
PWY.5692..allantoin.degradation.to.glyoxylate.II	4.57332e-06	1.6133e-05	0	0	0	0	0.000326343	0.142301	N
URDEGR.PWY..superpathway.of.allantoin.degradation.in.plants	4.57332e-06	1.6133e-05	0	0	0	0	0.000326343	0.142301	N
PHOTOALL.PWY..oxygenic.photosynthesis	2.19877e-06	3.89539e-05	0	0	0	0	0.00182379	0.0176845	N
PWY.6435..4.hydroxybenzoate.biosynthesis.V	2.05099e-06	1.94949e-05	0	0	0	0	0.000809733	0.0358406	N
PWY.7268..NAD.NADP.NADH.NADPH.cytosolic.interconversion..yeast.	1.43073e-06	2.29227e-05	0	0	0	0	0.000901491	0.0202782	N
PWY.181..photorespiration	1.20115e-06	1.67349e-05	0	0	0	0	0.000504293	0.00813487	N
PWY.7245..superpathway.NAD.NADP...NADH.NADPH.interconversion..yeast.	1.01838e-06	1.80126e-05	0	0	0	0	0.000689012	0.0140297	N
PWY.7288..fatty.acid..beta..oxidation..peroxisome..yeast.	6.23938e-07	7.21965e-06	0	0	0	0	0.00041551	0.0202782	N
PWY.5067..glycogen.biosynthesis.II..from.UDP.D.Glucose.	5.75797e-07	5.49353e-06	0	0	0	0	0.00020244	0.0213393	N
PWY.3481..superpathway.of.L.phenylalanine.and.L.tyrosine.biosynthesis	2.25994e-09	2.08135e-07	0	0	0	0	1.91688e-05	0.000117897	N
PWY.3502..superpathway.of.NAD.biosynthesis.in.eukaryotes	6.27968e-08	1.42584e-06	0	0	0	0	5.58946e-05	0.00224004	N
PWY.4321..L.glutamate.degradation.IV	3.90208e-07	8.72159e-06	0	0	0	0	0.000530719	0.00636642	N
PWY.5079..L.phenylalanine.degradation.III	2.16647e-07	2.79952e-06	0	0	0	0	9.15173e-05	0.00978543	N
PWY.5081..L.tryptophan.degradation.VIII..to.tryptophol.	1.54991e-09	1.07715e-07	0	0	0	0	9.02358e-06	0.000235793	N
PWY.5129..sphingolipid.biosynthesis..plants.	1.14459e-07	1.72269e-06	0	0	0	0	7.11622e-05	0.00695591	N
PWY.5156..superpathway.of.fatty.acid.biosynthesis.II..plant.	1.26856e-07	5.15345e-06	0	0	0	0	0.000323226	0.00070738	N
PWY.5381..pyridine.nucleotide.cycling..plants.	2.16631e-07	3.42108e-06	0	0	0	0	0.000150741	0.00601273	N
PWY.5754..4.hydroxybenzoate.biosynthesis.I..eukaryotes.	1.60273e-09	1.47608e-07	0	0	0	0	1.35944e-05	0.000117897	N
PWY.5870..ubiquinol.8.biosynthesis..eukaryotic.	2.97621e-07	4.45526e-06	0	0	0	0	0.000148489	0.00742749	N
PWY.5994..palmitate.biosynthesis.I..animals.and.fungi.	9.14156e-09	6.69745e-07	0	0	0	0	6.0073e-05	0.00035369	N
PWY.6074..zymosterol.biosynthesis	5.80881e-08	1.37542e-06	0	0	0	0	5.36028e-05	0.00224004	N
PWY.6075..ergosterol.biosynthesis.I	1.65498e-07	3.40571e-06	0	0	0	0	0.00013529	0.00554115	N
PWY.6174..mevalonate.pathway.II..archaea.	1.86761e-07	3.19948e-06	0	0	0	0	0.000123561	0.00506956	N
PWY.6351..D.myo.inositol..1.4.5..trisphosphate.biosynthesis	4.81378e-08	1.00837e-06	0	0	0	0	4.38579e-05	0.00412639	N
PWY.6352..3.phosphoinositide.biosynthesis	1.5613e-09	1.10859e-07	0	0	0	0	9.49911e-06	0.000235793	N
PWY.6358..superpathway.of.D.myo.inositol..1.4.5..trisphosphate.metabolism	1.15613e-08	6.10382e-07	0	0	0	0	4.47215e-05	0.000589484	N
PWY.6433..hydroxylated.fatty.acid.biosynthesis..plants.	1.33155e-07	2.59479e-06	0	0	0	0	9.75579e-05	0.00330111	N
PWY.6562..norspermidine.biosynthesis	1.7901e-07	2.56966e-06	0	0	0	0	8.45238e-05	0.0073096	N
PWY.6565..superpathway.of.polyamine.biosynthesis.III	1.63445e-08	6.76797e-07	0	0	0	0	5.21784e-05	0.000943174	N
PWY.6598..sciadonate.biosynthesis	1.88304e-07	2.62426e-06	0	0	0	0	6.96228e-05	0.00801698	N
PWY.6787..flavonoid.biosynthesis..in.equisetum.	1.87171e-08	1.13247e-06	0	0	0	0	7.77905e-05	0.00035369	N
PWY.6829..tRNA.methylation..yeast.	1.48132e-08	4.68594e-07	0	0	0	0	3.29246e-05	0.00153266	N
PWY.6981..chitin.biosynthesis	1.80341e-07	3.47595e-06	0	0	0	0	0.000183777	0.00471587	N
PWY.7049..icosapentaenoate.biosynthesis.II..metazoa.	1.98307e-08	7.3449e-07	0	0	0	0	5.25394e-05	0.00106107	N
PWY.7053..docosahexaenoate.biosynthesis.I..lower.eukaryotes.	1.23738e-07	2.1069e-06	0	0	0	0	6.71054e-05	0.00459797	N
PWY.7115..C4.photosynthetic.carbon.assimilation.cycle..NAD.ME.type	1.53171e-05	4.78281e-05	0	0	0	0	0.000910653	0.229899	N
PWY.7118..chitin.degradation.to.ethanol	2.19465e-07	2.72748e-06	0	0	0	0	8.92612e-05	0.0108465	N
PWY.7238..sucrose.biosynthesis.II	5.3347e-08	1.6007e-06	0	0	0	0	7.66962e-05	0.00129686	N
PWY.7270..L.methionine.salvage.cycle.II..plants.	3.59529e-08	2.20706e-06	0	0	0	0	0.000192216	0.000589484	N
PWY.7283..wybutosine.biosynthesis	5.89691e-08	1.8314e-06	0	0	0	0	0.00015206	0.00448008	N
PWY.7337..10.cis.heptadecenoyl.CoA.degradation..yeast.	4.42618e-08	1.10374e-06	0	0	0	0	5.7161e-05	0.00247583	N
PWY.7338..10.trans.heptadecenoyl.CoA.degradation..reductase.dependent..yeast.	4.42618e-08	1.10374e-06	0	0	0	0	5.7161e-05	0.00247583	N
PWY.7345..superpathway.of.anaerobic.sucrose.degradation	1.56969e-05	0.000105921	0	0	0	0	0.00226972	0.0432681	N
PWY.7347..sucrose.biosynthesis.III	3.29122e-08	9.51918e-07	0	0	0	0	4.04391e-05	0.00129686	N
PWY.7397..naringenin.biosynthesis..engineered.	1.09563e-08	5.04013e-07	0	0	0	0	3.62832e-05	0.000589484	N
PWY.7411..superpathway.of.phosphatidate.biosynthesis..yeast.	2.77614e-07	3.67413e-06	0	0	0	0	0.000155534	0.0130865	N
PWY.7420..monoacylglycerol.metabolism..yeast.	1.2255e-07	3.55167e-06	0	0	0	0	0.000298133	0.00495166	N
PWY.7511..protein.ubiquitylation	4.97966e-09	3.25908e-07	0	0	0	0	2.32433e-05	0.000235793	N
PWY.7546..diphthamide.biosynthesis..eukaryotes.	1.3248e-08	3.31844e-07	0	0	0	0	1.46506e-05	0.00200424	N
PWY3O.355..stearate.biosynthesis.III..fungi.	1.35122e-07	2.80143e-06	0	0	0	0	0.000104085	0.0035369	N
SPHINGOLIPID.SYN.PWY..sphingolipid.biosynthesis..yeast.	7.13886e-08	1.39454e-06	0	0	0	0	5.83557e-05	0.00400849	N
TRIGLSYN.PWY..diacylglycerol.and.triacylglycerol.biosynthesis	4.69566e-08	1.01103e-06	0	0	0	0	3.9523e-05	0.00259373	N
LYSINE.DEG1.PWY..L.lysine.degradation.XI..mammalian.	1.68016e-08	5.89192e-07	0	0	0	0	3.8365e-05	0.00141476	N
PWY66.398..TCA.cycle.III..animals.	6.38916e-05	9.70251e-05	0	0	0	0.00010956	0.000827069	0.448243	N
PWY.6549..L.glutamine.biosynthesis.III	4.49708e-05	7.59209e-05	0	0	0	7.68912e-05	0.000890961	0.405211	N
PWY.7117..C4.photosynthetic.carbon.assimilation.cycle..PEPCK.type	4.49063e-05	0.000134855	0	0	0	3.60495e-05	0.0035402	0.340839	N
PWY.241..C4.photosynthetic.carbon.assimilation.cycle..NADP.ME.type	3.46083e-05	9.38936e-05	0	0	0	2.74822e-05	0.00160497	0.339189	N
PWY66.389..phytol.degradation	1.07651e-05	6.78835e-05	0	0	0	0	0.00324633	0.122848	N
PWY.6596..adenosine.nucleotides.degradation.I	4.85074e-06	4.88067e-05	0	0	0	0	0.000973886	0.0240509	N
PWY.6318..L.phenylalanine.degradation.IV..mammalian..via.side.chain.	4.33645e-06	9.41649e-05	0	0	0	0	0.00630946	0.0396133	N
PWY.5044..purine.nucleotides.degradation.I..plants.	3.53074e-06	3.32016e-05	0	0	0	0	0.000834788	0.0232257	N
PWY66.201..nicotine.degradation.IV	2.74896e-06	0.000131155	0	0	0	0	0.0118738	0.0139118	N
PWY.5304..superpathway.of.sulfur.oxidation..Acidianus.ambivalens.	1.07373e-06	1.64621e-05	0	0	0	0	0.000661052	0.00884225	N
PWY66.391..fatty.acid..beta..oxidation.VI..peroxisome.	8.93822e-07	1.01844e-05	0	0	0	0	0.000550913	0.0193351	N
PWY.6309..L.tryptophan.degradation.XI..mammalian..via.kynurenine.	7.70241e-07	9.53852e-06	0	0	0	0	0.000468122	0.0226362	N
PWY.7389..superpathway.of.anaerobic.energy.metabolism..invertebrates.	6.95038e-07	8.31838e-06	0	0	0	0	0.000418608	0.0133223	N
PWY.361..phenylpropanoid.biosynthesis	2.88239e-08	1.27329e-06	0	0	0	0	6.887e-05	0.000589484	N
PWY.4061..glutathione.mediated.detoxification.I	3.77684e-08	2.43356e-06	0	0	0	0	0.000214724	0.000471587	N
PWY.4161..superpathway.of.benzoxazinoid.glucosides.biosynthesis	5.44609e-09	5.01572e-07	0	0	0	0	4.61937e-05	0.000117897	N
PWY.4202..arsenate.detoxification.I..glutaredoxin.	7.30387e-09	4.76537e-07	0	0	0	0	3.28981e-05	0.000235793	N
PWY.5109..2.methylbutanoate.biosynthesis	1.91837e-08	8.139e-07	0	0	0	0	4.78655e-05	0.000589484	N
PWY.5328..superpathway.of.L.methionine.salvage.and.degradation	2.35459e-08	7.97682e-07	0	0	0	0	4.40282e-05	0.00106107	N
PWY.5872..ubiquinol.10.biosynthesis..eukaryotic.	1.90068e-07	2.95227e-06	0	0	0	0	0.000148489	0.00672011	N
PWY.6098..diploterol.and.cycloartenol.biosynthesis	2.96517e-09	2.15353e-07	0	0	0	0	1.87851e-05	0.000235793	N
PWY.6117..spermine.and.spermidine.degradation.I	4.9213e-08	2.8032e-06	0	0	0	0	0.000248579	0.000943174	N
PWY.6138..CMP.N.acetylneuraminate.biosynthesis.I..eukaryotes.	2.95789e-08	7.94729e-07	0	0	0	0	3.7042e-05	0.00200424	N
PWY.6307..L.tryptophan.degradation.X..mammalian..via.tryptamine.	8.60496e-08	2.01317e-06	0	0	0	0	8.09989e-05	0.00271162	N
PWY.6313..serotonin.degradation	3.1784e-07	8.5564e-06	0	0	0	0	0.000671194	0.00624853	N
PWY.6342..noradrenaline.and.adrenaline.degradation	7.19133e-08	2.71227e-06	0	0	0	0	0.000197677	0.00117897	N
PWY.6367..D.myo.inositol.5.phosphate.metabolism	1.67732e-08	6.36073e-07	0	0	0	0	4.08476e-05	0.000943174	N
PWY.6368..3.phosphoinositide.degradation	1.47274e-09	9.84248e-08	0	0	0	0	7.68725e-06	0.000235793	N
PWY.6557..glycoaminoglycan.protein.linkage.region.biosynthesis	5.80772e-09	4.25584e-07	0	0	0	0	3.84428e-05	0.00035369	N
PWY.6558..heparan.sulfate.biosynthesis..late.stages.	9.0933e-09	8.37472e-07	0	0	0	0	7.71293e-05	0.000117897	N
PWY.6763..salicortin.biosynthesis	9.62578e-10	8.86513e-08	0	0	0	0	8.16459e-06	0.000117897	N
PWY.6857..retinol.biosynthesis	8.46913e-08	6.37962e-06	0	0	0	0	0.000580066	0.000589484	N
PWY.6861..the.visual.cycle.I..vertebrates.	1.0269e-08	9.45749e-07	0	0	0	0	8.71013e-05	0.000117897	N
PWY.6949..DIBOA.glucoside.biosynthesis	6.72199e-09	6.1908e-07	0	0	0	0	5.70159e-05	0.000117897	N
PWY.7112..4.hydroxy.2.nonenal.detoxification	1.52074e-07	4.05058e-06	0	0	0	0	0.000296252	0.00330111	N
PWY.7277..sphingolipid.biosynthesis..mammals.	3.12606e-09	2.15144e-07	0	0	0	0	1.90262e-05	0.00035369	N
PWY.7342..superpathway.of.nicotine.biosynthesis	2.27705e-08	1.36423e-06	0	0	0	0	0.000109	0.00035369	N
PWY.7379..mRNA.capping.II	2.68899e-09	1.27419e-07	0	0	0	0	7.95363e-06	0.000471587	N
PWY.7426..mannosyl.glycoprotein.N.acetylglucosaminyltransferases	1.87921e-08	1.27199e-06	0	0	0	0	0.000108723	0.00035369	N
PWY.7433..mucin.core.1.and.core.2.O.glycosylation	2.86403e-08	2.55758e-06	0	0	0	0	0.000235429	0.000235793	N
PWY.7434..terminal.O.glycans.residues.modification	9.65479e-09	4.05036e-07	0	0	0	0	2.24124e-05	0.000589484	N
PWY.7592..arachidonate.biosynthesis.III..metazoa.	1.03879e-07	1.73129e-06	0	0	0	0	5.40336e-05	0.00483377	N
PWY.7606..docosahexaenoate.biosynthesis.III..mammals.	3.1101e-08	1.10311e-06	0	0	0	0	6.70109e-05	0.000943174	N
PWY.7619..juniperonate.biosynthesis	1.96467e-07	2.68557e-06	0	0	0	0	6.96228e-05	0.00837067	N
PWY1F.823..leucopelargonidin.and.leucocyanidin.biosynthesis	9.37561e-08	1.31689e-06	0	0	0	0	6.67891e-05	0.00884225	N
PWY1F.FLAVSYN..flavonoid.biosynthesis	4.01411e-09	3.69691e-07	0	0	0	0	3.40477e-05	0.000117897	N
PWY3DJ.35471..L.ascorbate.biosynthesis.IV	3.65872e-08	1.16057e-06	0	0	0	0	5.94815e-05	0.00117897	N
PWY66.341..cholesterol.biosynthesis.I	2.17244e-09	2.00077e-07	0	0	0	0	1.84266e-05	0.000117897	N
PWY66.367..ketogenesis	8.3797e-08	2.00211e-06	0	0	0	0	0.000129434	0.00282952	N
PWY66.373..sucrose.degradation.V..sucrose..alpha..glucosidase.	3.62435e-08	1.44998e-06	0	0	0	0	8.88703e-05	0.000825277	N
PWY66.374..C20.prostanoid.biosynthesis	3.1568e-08	1.70162e-06	0	0	0	0	0.000140973	0.000589484	N
PWY66.375..leukotriene.biosynthesis	2.71514e-07	2.76948e-06	0	0	0	0	9.3962e-05	0.0142655	N
PWY66.378..androgen.biosynthesis	2.4455e-08	2.25225e-06	0	0	0	0	0.000207427	0.000117897	N
PWY66.388..fatty.acid..alpha..oxidation.III	3.89009e-07	5.19818e-06	0	0	0	0	0.000263027	0.0146192	N
PWY66.5..superpathway.of.cholesterol.biosynthesis	2.36867e-09	2.18149e-07	0	0	0	0	2.0091e-05	0.000117897	N
PWY6666.2..dopamine.degradation	2.25244e-07	3.53159e-06	0	0	0	0	0.000197677	0.00778118	N
UDPNACETYLGALSYN.PWY..UDP.N.acetyl.D.glucosamine.biosynthesis.II	3.38027e-07	4.07047e-06	0	0	0	0	0.000162926	0.0123792	N
PWY.3801..sucrose.degradation.II..sucrose.synthase.	1.66484e-05	0.000111691	0	0	0	0	0.00237418	0.0432681	N
PWY490.3..nitrate.reduction.VI..assimilatory.	1.16836e-05	2.86766e-05	0	0	0	0	0.000379538	0.247583	N
PWY.6785..hydrogen.production.VIII	2.88639e-06	2.51463e-05	0	0	0	0	0.0012087	0.0409102	N
PWY.7384..anaerobic.energy.metabolism..invertebrates..mitochondrial.	5.23716e-07	6.71684e-06	0	0	0	0	0.000420496	0.0149729	N
PWY.622..starch.biosynthesis	9.47845e-08	2.44894e-06	0	0	0	0	0.00013621	0.00212214	N
PWY.6524..lychnose.and.isolychnose.biosynthesis	3.14484e-09	2.89632e-07	0	0	0	0	2.66745e-05	0.000117897	N
PWY.6842..glutathione.mediated.detoxification.II	3.68868e-08	1.33815e-06	0	0	0	0	6.73163e-05	0.000825277	N
SUCSYN.PWY..sucrose.biosynthesis.I..from.photosynthesis.	8.60868e-08	2.59359e-06	0	0	0	0	0.000126042	0.00129686	N
PWY.5514..UDP.N.acetyl.D.galactosamine.biosynthesis.II	2.05105e-07	3.16574e-06	0	0	0	0	0.000163634	0.00695591	N
PWY.101..photosynthesis.light.reactions	7.87435e-06	8.28979e-05	0	0	0	0	0.00331332	0.0626032	N
PWY.6837..fatty.acid.beta.oxidation.V..unsaturated..odd.number..di.isomerase.dependent.	8.90158e-07	2.21175e-05	0	0	0	0	0.00157596	0.0187456	N
PWY.5860..superpathway.of.demethylmenaquinol.6.biosynthesis.I	0.00012386	0.000452038	0	0	0	0	0.00518731	0.213747	Y
POLYAMINSYN3.PWY..superpathway.of.polyamine.biosynthesis.II	0.000174056	0.00028763	0	0	2.92703e-05	0.000228675	0.00309097	0.625324	Y
ENTBACSYN.PWY..enterobactin.biosynthesis	0.000183694	0.0006205	0	0	0	8.146e-05	0.00835781	0.284485	Y
FOLSYN.PWY..superpathway.of.tetrahydrofolate.biosynthesis.and.salvage	0.00023844	0.000414571	0	0	9.86348e-05	0.00028041	0.00379424	0.647607	Y
PWY.5097..L.lysine.biosynthesis.VI	0.0163023	0.00466972	0.00386432	0.0137313	0.0154318	0.0178017	0.074677	1	Y
PWY.6151..S.adenosyl.L.methionine.cycle.I	0.0155987	0.00637045	0.00194398	0.0120994	0.0145057	0.0174722	0.105892	1	Y
PWY.2942..L.lysine.biosynthesis.III	0.0155533	0.00476099	0.00361766	0.0128583	0.0146698	0.0171513	0.074254	1	Y
PWY.6121..5.aminoimidazole.ribonucleotide.biosynthesis.I	0.0154774	0.00344539	0.00211009	0.0135403	0.0153623	0.0173806	0.0562225	1	Y
PWY.6122..5.aminoimidazole.ribonucleotide.biosynthesis.II	0.0153449	0.00351059	0.00170536	0.0133382	0.0152416	0.0172802	0.0571843	1	Y
PWY.6277..superpathway.of.5.aminoimidazole.ribonucleotide.biosynthesis	0.0153449	0.00351059	0.00170536	0.0133382	0.0152416	0.0172802	0.0571843	1	Y
PWY.6737..starch.degradation.V	0.0150934	0.00504211	0.000474953	0.0119749	0.0153697	0.0181923	0.0878755	1	Y
PWY.7111..pyruvate.fermentation.to.isobutanol..engineered.	0.0148573	0.00264509	0.000550157	0.0132873	0.0149078	0.0164562	0.0311541	1	Y
ILEUSYN.PWY..L.isoleucine.biosynthesis.I..from.threonine.	0.0148497	0.00265783	0.000550157	0.0132921	0.0149074	0.0164532	0.0311541	1	Y
VALSYN.PWY..L.valine.biosynthesis	0.0148497	0.00265783	0.000550157	0.0132921	0.0149074	0.0164532	0.0311541	1	Y
PWY.6700..queuosine.biosynthesis	0.0148469	0.00760321	0.000315914	0.0100781	0.0133978	0.0177374	0.106321	1	Y
TRNA.CHARGING.PWY..tRNA.charging	0.0139809	0.00479267	0.000217294	0.0105691	0.0137053	0.0169678	0.038547	1	Y
PANTO.PWY..phosphopantothenate.biosynthesis.I	0.0130946	0.00332634	0.000671849	0.0107544	0.0129317	0.015316	0.0329505	1	Y
PWY0.1319..CDP.diacylglycerol.biosynthesis.II	0.0123354	0.00265902	0.000776429	0.0108341	0.012294	0.0136415	0.0519836	1	Y
PWY.5667..CDP.diacylglycerol.biosynthesis.I	0.0123353	0.00265904	0.000776429	0.0108341	0.012294	0.0136415	0.0519836	1	Y
ARO.PWY..chorismate.biosynthesis.I	0.0119349	0.00266576	0.00146346	0.010318	0.0120016	0.0135595	0.0534759	1	Y
PWY.6163..chorismate.biosynthesis.from.3.dehydroquinate	0.0117372	0.00289858	0.00113841	0.00991804	0.0117201	0.0134437	0.0498104	1	Y
PWY.7229..superpathway.of.adenosine.nucleotides.de.novo.biosynthesis.I	0.0116157	0.00322457	0.00153576	0.00933135	0.0112938	0.0135678	0.0265606	1	Y
COMPLETE.ARO.PWY..superpathway.of.aromatic.amino.acid.biosynthesis	0.0114993	0.00218969	0.00165303	0.0102588	0.0115932	0.0128362	0.0231313	1	Y
PWY.724..superpathway.of.L.lysine..L.threonine.and.L.methionine.biosynthesis.II	0.0114892	0.00183065	0.00105344	0.0105168	0.0115167	0.0125234	0.0218673	1	Y
ANAGLYCOLYSIS.PWY..glycolysis.III..from.glucose.	0.0106425	0.00249916	0.000285131	0.00909878	0.0107448	0.0122073	0.0254393	1	Y
PWY0.1296..purine.ribonucleosides.degradation	0.0104015	0.00542449	0	0.00640222	0.00952035	0.013231	0.0721521	0.999882	Y
PWY.6703..preQ0.biosynthesis	0.00972309	0.00422805	0.00043972	0.00685674	0.00906128	0.0118064	0.100593	1	Y
PWY.6126..superpathway.of.adenosine.nucleotides.de.novo.biosynthesis.II	0.00968302	0.00312527	0.000945152	0.00744627	0.00928506	0.0114579	0.0247322	1	Y
PWY.7228..superpathway.of.guanosine.nucleotides.de.novo.biosynthesis.I	0.0089226	0.00347849	0.000239141	0.00650867	0.00841943	0.0107702	0.037712	1	Y
X1CMET2.PWY..N10.formyl.tetrahydrofolate.biosynthesis	0.00873034	0.00335125	5.63786e-05	0.00645392	0.00824859	0.0104985	0.0309517	1	Y
PWY0.166..superpathway.of.pyrimidine.deoxyribonucleotides.de.novo.biosynthesis..E..coli.	0.0084267	0.00280082	0.000326451	0.00651587	0.00813259	0.00994323	0.0543056	1	Y
NONOXIPENT.PWY..pentose.phosphate.pathway..non.oxidative.branch.	0.00819783	0.00260952	0.000736418	0.0066737	0.00809752	0.00945649	0.090406	1	Y
THRESYN.PWY..superpathway.of.L.threonine.biosynthesis	0.00794863	0.00192276	0.000914448	0.00665838	0.0078437	0.00911082	0.0176952	1	Y
BRANCHED.CHAIN.AA.SYN.PWY..superpathway.of.branched.amino.acid.biosynthesis	0.0079476	0.00256234	0.000148417	0.00620265	0.00791913	0.0096387	0.018468	1	Y
DTDPRHAMSYN.PWY..dTDP.L.rhamnose.biosynthesis.I	0.00792312	0.00246446	0.000149619	0.00630089	0.00777219	0.00938704	0.0279848	1	Y
PWY.5973..cis.vaccenate.biosynthesis	0.00783024	0.00203114	0.000342819	0.00648076	0.0077522	0.00905339	0.0186083	1	Y
PWY.7208..superpathway.of.pyrimidine.nucleobases.salvage	0.00778285	0.00276684	0.00017525	0.00577356	0.00763122	0.0096386	0.0205714	1	Y
PWY.3001..superpathway.of.L.isoleucine.biosynthesis.I	0.00773028	0.00173953	0.000459383	0.0065833	0.00770663	0.0088454	0.0175467	1	Y
PWY.6125..superpathway.of.guanosine.nucleotides.de.novo.biosynthesis.II	0.00770765	0.00287399	0.000249071	0.00567516	0.00732263	0.00930253	0.0260096	1	Y
PWY0.162..superpathway.of.pyrimidine.ribonucleotides.de.novo.biosynthesis	0.0073839	0.00268564	0.000202802	0.00543308	0.00726098	0.00915248	0.0227206	1	Y
PWY.7663..gondoate.biosynthesis..anaerobic.	0.00703957	0.00208731	0.000313222	0.00566348	0.006871	0.00820142	0.0243574	1	Y
PWY.5103..L.isoleucine.biosynthesis.III	0.00703433	0.00254581	0.000111561	0.00524298	0.00690852	0.00867934	0.0182267	1	Y
PWY.7184..pyrimidine.deoxyribonucleotides.de.novo.biosynthesis.I	0.00673756	0.00270731	0.000175657	0.00495126	0.00635852	0.00808369	0.057502	1	Y
PWY.6123..inosine.5..phosphate.biosynthesis.I	0.00652555	0.00177902	0.000885073	0.0053264	0.00640617	0.00758193	0.0170507	1	Y
PYRIDNUCSYN.PWY..NAD.biosynthesis.I..from.aspartate.	0.00641055	0.00256831	0	0.00467364	0.00611086	0.00781308	0.0244586	0.999882	Y
PWY.841..superpathway.of.purine.nucleotides.de.novo.biosynthesis.I	0.00630313	0.00152535	0.000393135	0.00530593	0.00636648	0.00734614	0.0118303	1	Y
PWY.7197..pyrimidine.deoxyribonucleotide.phosphorylation	0.00606206	0.0027849	0.000106528	0.0041428	0.00564965	0.00751135	0.0558439	1	Y
PWY.6897..thiamin.salvage.II	0.00597621	0.00173562	0.000142639	0.00481966	0.00597617	0.0071112	0.0164948	1	Y
PANTOSYN.PWY..pantothenate.and.coenzyme.A.biosynthesis.I	0.00581779	0.00146502	4.61693e-05	0.00485845	0.00588408	0.00678292	0.0153159	1	Y
PWY.7220..adenosine.deoxyribonucleotides.de.novo.biosynthesis.II	0.00556865	0.00265628	0.00040858	0.00385084	0.00502671	0.00664507	0.0655615	1	Y
PWY.7222..guanosine.deoxyribonucleotides.de.novo.biosynthesis.II	0.00556865	0.00265628	0.00040858	0.00385084	0.00502671	0.00664507	0.0655615	1	Y
DENOVOPURINE2.PWY..superpathway.of.purine.nucleotides.de.novo.biosynthesis.II	0.00545265	0.00118347	0.000257252	0.00479436	0.00553507	0.00622414	0.0103801	1	Y
HISDEG.PWY..L.histidine.degradation.I	0.00515552	0.00321787	0	0.00288555	0.00449053	0.00667982	0.0270283	0.998703	Y
PWY.6609..adenine.and.adenosine.salvage.III	0.00504009	0.00164169	0.000211727	0.00393029	0.00494818	0.00602761	0.0228837	1	Y
PWY.7187..pyrimidine.deoxyribonucleotides.de.novo.biosynthesis.II	0.00503173	0.00148019	0.000200578	0.00412202	0.00499687	0.00590585	0.0142144	1	Y
PWY.6545..pyrimidine.deoxyribonucleotides.de.novo.biosynthesis.III	0.00491884	0.00156672	0.00015009	0.00388468	0.00485042	0.00584575	0.0124746	1	Y
SER.GLYSYN.PWY..superpathway.of.L.serine.and.glycine.biosynthesis.I	0.00489871	0.00187646	3.22558e-05	0.00359589	0.00480537	0.00606906	0.0134616	1	Y
PWY.7199..pyrimidine.deoxyribonucleosides.salvage	0.00475538	0.00252671	0	0.00312616	0.00438319	0.00589297	0.0357454	0.999646	Y
PWY.7234..inosine.5..phosphate.biosynthesis.III	0.00457555	0.00153853	0	0.00357146	0.00456811	0.00558605	0.0109958	0.999528	Y
PWY0.845..superpathway.of.pyridoxal.5..phosphate.biosynthesis.and.salvage	0.00445486	0.00264271	0	0.00254237	0.00406613	0.00586164	0.0233335	0.998585	Y
PWY.5659..GDP.mannose.biosynthesis	0.00442638	0.00248925	0.000124161	0.00285383	0.00395713	0.00537561	0.0257392	1	Y
PYRIDOXSYN.PWY..pyridoxal.5..phosphate.biosynthesis.I	0.00437482	0.00316431	0	0.00216772	0.00360843	0.005687	0.0280294	0.999293	Y
PWY.6317..galactose.degradation.I..Leloir.pathway.	0.0041465	0.00162925	5.61854e-05	0.00304423	0.00399331	0.00509327	0.0175575	1	Y
ASPASN.PWY..superpathway.of.L.aspartate.and.L.asparagine.biosynthesis	0.00403011	0.00121727	0.000149739	0.00320889	0.00392699	0.00472718	0.0138282	1	Y
PWY66.422..D.galactose.degradation.V..Leloir.pathway.	0.00402423	0.00170201	2.78342e-05	0.0028432	0.00387404	0.00503824	0.0175575	1	Y
ANAEROFRUCAT.PWY..homolactic.fermentation	0.00395373	0.00170846	0	0.00266367	0.00388234	0.00517539	0.0114613	0.997878	Y
COA.PWY..coenzyme.A.biosynthesis.I	0.00382555	0.0014002	2.37618e-05	0.00285068	0.00371639	0.00465517	0.0127274	1	Y
HSERMETANA.PWY..L.methionine.biosynthesis.III	0.00380376	0.00170075	0	0.0025946	0.0037205	0.00493357	0.0115361	0.999764	Y
PWY.7400..L.arginine.biosynthesis.IV..archaebacteria.	0.00370684	0.0033177	0	0.00115199	0.00254434	0.00552058	0.0195249	0.983848	Y
HISTSYN.PWY..L.histidine.biosynthesis	0.0037062	0.00129857	0.000258938	0.00282877	0.00359091	0.00448392	0.015574	1	Y
GALACTUROCAT.PWY..D.galacturonate.degradation.I	0.00369433	0.00148821	2.73613e-05	0.00269261	0.00355272	0.00452705	0.0202299	1	Y
RIBOSYN2.PWY..flavin.biosynthesis.I..bacteria.and.plants.	0.00369046	0.00165866	0	0.00255929	0.00371401	0.00480967	0.0126172	0.991394	Y
PWY.2941..L.lysine.biosynthesis.II	0.0035854	0.00241655	0	0.00172829	0.00308288	0.00498165	0.0426432	0.996345	Y
GALACT.GLUCUROCAT.PWY..superpathway.of.hexuronide.and.hexuronate.degradation	0.00351213	0.00132519	0	0.00261041	0.0034235	0.00432022	0.0121983	0.999882	Y
PWY4FS.7..phosphatidylglycerol.biosynthesis.I..plastidic.	0.00346924	0.00153638	0	0.00234292	0.00346971	0.00453635	0.011271	0.997288	Y
PWY4FS.8..phosphatidylglycerol.biosynthesis.II..non.plastidic.	0.00346924	0.00153637	0	0.00234292	0.00346971	0.00453635	0.011271	0.997288	Y
GLUCUROCAT.PWY..superpathway.of..beta..D.glucuronide.and.D.glucuronate.degradation	0.00346229	0.00141721	7.47173e-05	0.00247161	0.00333635	0.00432988	0.0115744	1	Y
ARGSYN.PWY..L.arginine.biosynthesis.I..via.L.ornithine.	0.00344655	0.00324866	0	0.000999277	0.00224669	0.00507372	0.0196043	0.983848	Y
PWY.1269..CMP.3.deoxy.D.manno.octulosonate.biosynthesis.I	0.00342034	0.00190097	0	0.00208865	0.00309486	0.0043571	0.0194061	0.999764	Y
PHOSLIPSYN.PWY..superpathway.of.phospholipid.biosynthesis.I..bacteria.	0.00334263	0.00164973	0	0.0021302	0.00330392	0.0045333	0.0108379	0.99328	Y
PWY.5100..pyruvate.fermentation.to.acetate.and.lactate.II	0.00331422	0.00132782	0	0.00237952	0.00323237	0.00416822	0.0107517	0.999764	Y
GLCMANNANAUT.PWY..superpathway.of.N.acetylglucosamine..N.acetylmannosamine.and.N.acetylneuraminate.degradation	0.0032008	0.00147431	1.20603e-05	0.0021656	0.00302046	0.00402713	0.0120617	1	Y
PWY.6507..4.deoxy.L.threo.hex.4.enopyranuronate.degradation	0.00319429	0.00157877	0	0.0020571	0.00299136	0.00411931	0.0128659	0.999293	Y
DAPLYSINESYN.PWY..L.lysine.biosynthesis.I	0.00314209	0.00147226	0	0.00209511	0.00300989	0.00401107	0.013051	0.998703	Y
COBALSYN.PWY..adenosylcobalamin.salvage.from.cobinamide.I	0.00311748	0.00142137	0	0.00215109	0.00293151	0.00390063	0.01221	0.999057	Y
PWY.4242..pantothenate.and.coenzyme.A.biosynthesis.III	0.00287652	0.00121061	0	0.00203368	0.00274386	0.00354676	0.0121398	0.999764	Y
PWY_GLYCOLYSIS..glycolysis.I..from.glucose.6.phosphate.	0.00276397	0.0019812	0	0.00126824	0.00226665	0.0037897	0.0161952	0.997996	Y
PWY0.1586..peptidoglycan.maturation..meso.diaminopimelate.containing.	0.0027431	0.00129388	0.000142749	0.00185753	0.00254068	0.00339654	0.0142221	1	Y
PWY.5484..glycolysis.II..from.fructose.6.phosphate.	0.00268452	0.00190019	0	0.0012536	0.00222055	0.00366055	0.0155886	0.997996	Y
PWY.5188..tetrapyrrole.biosynthesis.I..from.glutamate.	0.00266456	0.00130126	9.29331e-05	0.00177303	0.00246475	0.00329599	0.0137065	1	Y
PRPP.PWY..superpathway.of.histidine..purine..and.pyrimidine.biosynthesis	0.00250936	0.00112741	0	0.00173101	0.00252471	0.00328646	0.00629662	0.985027	Y
PWY.621..sucrose.degradation.III..sucrose.invertase.	0.00242169	0.00134727	0	0.0014803	0.00218628	0.00312682	0.0121364	0.999411	Y
PWY.5101..L.isoleucine.biosynthesis.II	0.00211209	0.00150777	0	0.000874007	0.00184182	0.00310252	0.0108953	0.993162	Y
ARGSYNBSUB.PWY..L.arginine.biosynthesis.II..acetyl.cycle.	0.00209855	0.00282256	0	0.000378619	0.000902963	0.00250677	0.0191868	0.976303	Y
RHAMCAT.PWY..L.rhamnose.degradation.I	0.00202764	0.00109051	1.45443e-05	0.00127618	0.00183056	0.00254281	0.0128603	1	Y
PWY.5347..superpathway.of.L.methionine.biosynthesis..transsulfuration.	0.00195848	0.00108221	0	0.00116012	0.00178574	0.00255556	0.00930791	0.999764	Y
METSYN.PWY..L.homoserine.and.L.methionine.biosynthesis	0.00195753	0.00118729	0	0.0010872	0.00172415	0.002589	0.0106613	0.999764	Y
TRPSYN.PWY..L.tryptophan.biosynthesis	0.00188457	0.00131555	0	0.00100037	0.00159502	0.00244244	0.0171604	0.998703	Y
MET.SAM.PWY..superpathway.of.S.adenosyl.L.methionine.biosynthesis	0.00178628	0.00121913	0	0.00091327	0.00149745	0.00235888	0.0109492	0.999764	Y
PWY.5177..glutaryl.CoA.degradation	0.00174949	0.000954573	0	0.00105316	0.00160977	0.00229559	0.00828845	0.998349	Y
NAGLIPASYN.PWY..lipid.IVA.biosynthesis	0.00163857	0.00137158	0	0.000611053	0.00133242	0.00234005	0.0117931	0.967814	Y
PWY.5154..L.arginine.biosynthesis.III..via.N.acetyl.L.citrulline.	0.00158821	0.00179035	0	0.000383743	0.000886128	0.00217629	0.0132731	0.983612	Y
PWY.7211..superpathway.of.pyrimidine.deoxyribonucleotides.de.novo.biosynthesis	0.0015712	0.00118994	0	0.000665971	0.00130022	0.00218587	0.00981994	0.978661	Y
GLUCONEO.PWY..gluconeogenesis.I	0.00149038	0.00112928	0	0.000658869	0.00126061	0.00205345	0.00931952	0.978307	Y
GLUTORN.PWY..L.ornithine.biosynthesis	0.00148404	0.00226917	0	0.000221482	0.000535574	0.00154151	0.0166582	0.983848	Y
PWY0.1479..tRNA.processing	0.00138718	0.00174017	0	0.000103	0.000736975	0.00208947	0.0174397	0.877152	Y
GLYCOGENSYNTH.PWY..glycogen.biosynthesis.I..from.ADP.D.Glucose.	0.00134479	0.000984245	0	0.000696373	0.00110789	0.00172377	0.0154609	0.998467	Y
PWY.7456..mannan.degradation	0.00132317	0.00125745	0	0.000274493	0.000984467	0.00210313	0.0100318	0.89908	Y
PWY.6608..guanosine.nucleotides.degradation.III	0.00130024	0.000714749	0	0.000869341	0.00118326	0.00155534	0.00831695	0.999646	Y
P4.PWY..superpathway.of.L.lysine..L.threonine.and.L.methionine.biosynthesis.I	0.00128458	0.000870335	0	0.000664269	0.00111176	0.00169515	0.00714292	0.988092	Y
PWY0.781..aspartate.superpathway	0.00120142	0.000834894	0	0.000609179	0.00102763	0.00158188	0.00615275	0.987621	Y
HEMESYN2.PWY..heme.biosynthesis.II..anaerobic.	0.00116582	0.00108838	0	0.000366965	0.0008848	0.00164604	0.0129895	0.983966	Y
PWY.5676..acetyl.CoA.fermentation.to.butanoate.II	0.00116313	0.000573501	0	0.000790201	0.00111905	0.00150121	0.00681253	0.973709	Y
PENTOSE.P.PWY..pentose.phosphate.pathway	0.00115519	0.000779447	0	0.000599653	0.00101558	0.00154088	0.00754137	0.992455	Y
P42.PWY..incomplete.reductive.TCA.cycle	0.00110843	0.000550372	0	0.000719727	0.00102124	0.00140268	0.00664523	0.998349	Y
PWY.6147..6.hydroxymethyl.dihydropterin.diphosphate.biosynthesis.I	0.00110306	0.000886205	0	0.000500738	0.000899079	0.00144896	0.0110973	0.99493	Y
HOMOSER.METSYN.PWY..L.methionine.biosynthesis.I	0.00108775	0.000743701	0	0.000565299	0.000915516	0.00141948	0.00859646	0.999764	Y
SALVADEHYPOX.PWY..adenosine.nucleotides.degradation.II	0.00107176	0.000582462	0	0.000714661	0.000986662	0.00130046	0.00709807	0.999175	Y
PWY.5104..L.isoleucine.biosynthesis.IV	0.00106366	0.000771327	0	0.000571517	0.000882201	0.00132972	0.00859391	0.996581	Y
OANTIGEN.PWY..O.antigen.building.blocks.biosynthesis..E..coli.	0.0010279	0.00080887	0	0.000463076	0.000826059	0.00137372	0.00762959	0.991511	Y
PWY.4984..urea.cycle	0.0010203	0.000909738	0	0.000398341	0.000783064	0.00136388	0.0117224	0.982433	Y
PWY.5345..superpathway.of.L.methionine.biosynthesis..by.sulfhydrylation.	0.000946372	0.000771279	0	0.000381933	0.000755103	0.00130977	0.00620931	0.966046	Y
PWY0.1261..anhydromuropeptides.recycling	0.000925732	0.000778723	0	0.000408244	0.000751501	0.00122068	0.00621052	0.964513	Y
PWY.7196..superpathway.of.pyrimidine.ribonucleosides.salvage	0.000906148	0.000940499	0	0.000247873	0.000603232	0.00126809	0.0068854	0.905683	Y
PWY.6901..superpathway.of.glucose.and.xylose.degradation	0.000853003	0.000579096	0	0.000460643	0.000753344	0.00111085	0.00470449	0.97536	Y
HEXITOLDEGSUPER.PWY..superpathway.of.hexitol.degradation..bacteria.	0.000830032	0.000638359	0	0.000384737	0.000686702	0.00110201	0.00638663	0.967107	Y
POLYAMSYN.PWY..superpathway.of.polyamine.biosynthesis.I	0.000807444	0.000548788	0	0.000402894	0.000706843	0.00110065	0.00510244	0.994813	Y
PWY.7323..superpathway.of.GDP.mannose.derived.O.antigen.building.blocks.biosynthesis	0.000807291	0.000783026	0	0.000310626	0.000591766	0.0010574	0.0106026	0.974652	Y
COLANSYN.PWY..colanic.acid.building.blocks.biosynthesis	0.000790119	0.000531063	0	0.000403635	0.000691887	0.00106884	0.00369167	0.975242	Y
PWY_TCA..TCA.cycle.I..prokaryotic.	0.000782806	0.000745803	0	0.000256583	0.000603583	0.00107419	0.00590276	0.946239	Y
UDPNAGSYN.PWY..UDP.N.acetyl.D.glucosamine.biosynthesis.I	0.000738679	0.00077726	0	0.000257368	0.000500417	0.000921755	0.00790959	0.991511	Y
PWY.7371..1.4.dihydroxy.6.naphthoate.biosynthesis.II	0.000730582	0.00108596	0	0.000122435	0.000422335	0.000924141	0.0252407	0.871139	Y
PWY.6969..TCA.cycle.V..2.oxoglutarate.ferredoxin.oxidoreductase.	0.000720556	0.000725435	0	0.00021922	0.000529815	0.000977658	0.00581199	0.943056	Y
P441.PWY..superpathway.of.N.acetylneuraminate.degradation	0.00071691	0.000517604	0	0.0003972	0.000612792	0.000882213	0.00477667	0.984791	Y
PWY_GLYCOLYSIS.E.D..superpathway.of.glycolysis.and.Entner.Doudoroff	0.000691227	0.000539704	0	0.000336611	0.000586963	0.000910881	0.00637492	0.97312	Y
PWY.5989..stearate.biosynthesis.II..bacteria.and.plants.	0.000685304	0.000650585	0	0.000273406	0.000491858	0.000869242	0.00700616	0.988092	Y
P162.PWY..L.glutamate.degradation.V..via.hydroxyglutarate.	0.000680904	0.000344669	0	0.000453761	0.000658733	0.000880237	0.00337424	0.97029	Y
THISYN.PWY..superpathway.of.thiamin.diphosphate.biosynthesis.I	0.000675948	0.00126924	0	0	0.000225185	0.000648127	0.00885332	0.65079	Y
SULFATE.CYS.PWY..superpathway.of.sulfate.assimilation.and.cysteine.biosynthesis	0.000666539	0.000643644	0	0.000291085	0.00048366	0.0007907	0.00566066	0.979368	Y
SO4ASSIM.PWY..sulfate.reduction.I..assimilatory.	0.000633705	0.000827028	0	0.000184333	0.000385042	0.000759151	0.0110886	0.979958	Y
PWY.6353..purine.nucleotides.degradation.II..aerobic.	0.00063132	0.000595263	0	0.000302131	0.000507613	0.000777637	0.00667699	0.972294	Y
FASYN.ELONG.PWY..fatty.acid.elongation....saturated	0.000629785	0.000709123	0	0.000220731	0.000438767	0.000773863	0.00867256	0.938576	Y
PWY0.1297..superpathway.of.purine.deoxyribonucleosides.degradation	0.000614865	0.00074207	0	0.000272419	0.000425411	0.000658421	0.0119394	0.997642	Y
BIOTIN.BIOSYNTHESIS.PWY..biotin.biosynthesis.I	0.000608356	0.000626736	0	0.00023352	0.000447611	0.000759018	0.00697356	0.937633	Y
PWY.7664..oleate.biosynthesis.IV..anaerobic.	0.000567082	0.000669882	0	0.000193401	0.000385422	0.000686485	0.00848484	0.93834	Y
PWY.7237..myo...chiro..and.scillo.inositol.degradation	0.000557619	0.00051458	0	0.00024957	0.000433396	0.000712651	0.0151728	0.96133	Y
PWY.5121..superpathway.of.geranylgeranyl.diphosphate.biosynthesis.II..via.MEP.	0.000555996	0.000611014	0	6.48386e-05	0.000357682	0.000880916	0.00447716	0.808064	Y
PWY.5971..palmitate.biosynthesis.II..bacteria.and.plants.	0.000542261	0.000563327	0	0.000138484	0.000413383	0.000759142	0.00523085	0.812898	Y
PWY.7210..pyrimidine.deoxyribonucleotides.biosynthesis.from.CTP	0.000521146	0.000700206	0	4.88656e-05	0.000271566	0.000707714	0.00692954	0.827163	Y
PWY_ARG.POLYAMINE.SYN..superpathway.of.arginine.and.polyamine.biosynthesis	0.000519209	0.000537205	0	0.000108764	0.000339093	0.000785945	0.00417758	0.832233	Y
PWY.6282..palmitoleate.biosynthesis.I..from..5Z..dodec.5.enoate.	0.000518087	0.00060928	0	0.000186015	0.000361296	0.000623378	0.00831412	0.93834	Y
PWY.6519..8.amino.7.oxononanoate.biosynthesis.I	0.000517364	0.000592204	0	0.000187162	0.000362339	0.000625261	0.00670004	0.937633	Y
PWY0.862...5Z..dodec.5.enoate.biosynthesis	0.000505818	0.000630301	0	0.000168334	0.00033536	0.000599296	0.00824683	0.942113	Y
P108.PWY..pyruvate.fermentation.to.propanoate.I	0.000498204	0.000676885	0	5.32239e-05	0.000245076	0.000678395	0.0065294	0.870549	Y
PWY0.1298..superpathway.of.pyrimidine.deoxyribonucleosides.degradation	0.000455054	0.000428339	0	0.000229021	0.000351649	0.000532684	0.00582087	0.992219	Y
PWY.6895..superpathway.of.thiamin.diphosphate.biosynthesis.II	0.000448304	0.00114198	0	0	0	0.000262989	0.00863382	0.373615	Y
FASYN.INITIAL.PWY..superpathway.of.fatty.acid.biosynthesis.initiation..E..coli.	0.000444721	0.000614111	0	0.000139932	0.000283118	0.000510813	0.0122201	0.93834	Y
PWY.6590..superpathway.of.Clostridium.acetobutylicum.acidogenic.fermentation	0.00044419	0.000265873	0	0.000264104	0.000419987	0.000592186	0.00226232	0.949069	Y
P461.PWY..hexitol.fermentation.to.lactate..formate..ethanol.and.acetate	0.000436079	0.000536545	0	0.000166238	0.000308469	0.000515446	0.0102715	0.969465	Y
PYRIDNUCSAL.PWY..NAD.salvage.pathway.I	0.000427176	0.000509364	0	0	0.000260026	0.00062111	0.00390228	0.734732	Y
PWY.7198..pyrimidine.deoxyribonucleotides.de.novo.biosynthesis.IV	0.000403499	0.000589799	0	3.4149e-05	0.000193716	0.000518451	0.00662625	0.826692	Y
P161.PWY..acetylene.degradation	0.000357885	0.000388841	0	0.000163628	0.000261728	0.000403775	0.00516728	0.995992	Y
CENTFERM.PWY..pyruvate.fermentation.to.butanoate	0.000356837	0.000218276	0	0.000209139	0.000334596	0.000475208	0.00189272	0.949069	Y
PWY.7328..superpathway.of.UDP.glucose.derived.O.antigen.building.blocks.biosynthesis	0.000344164	0.000246285	0	0.000164076	0.000303324	0.000485039	0.00209028	0.92938	Y
LACTOSECAT.PWY..lactose.and.galactose.degradation.I	0.00032485	0.00035055	0	9.72499e-05	0.000223255	0.000425107	0.00399532	0.934449	Y
PWY.6628..superpathway.of.L.phenylalanine.biosynthesis	0.000324441	0.000782863	0	0	2.91373e-05	0.000240888	0.00742537	0.505541	Y
PWY.5897..superpathway.of.menaquinol.11.biosynthesis	0.000317642	0.00075838	0	0	0	0.000265692	0.00750741	0.495166	Y
PWY.5898..superpathway.of.menaquinol.12.biosynthesis	0.000317642	0.00075838	0	0	0	0.000265692	0.00750741	0.495166	Y
PWY.5899..superpathway.of.menaquinol.13.biosynthesis	0.000317642	0.00075838	0	0	0	0.000265692	0.00750741	0.495166	Y
PWY.6284..superpathway.of.unsaturated.fatty.acids.biosynthesis..E..coli.	0.00028558	0.000290937	0	7.05673e-05	0.000210165	0.000417191	0.00321409	0.812898	Y
PWY.5022..4.aminobutanoate.degradation.V	0.000283231	0.000465166	0	2.23764e-05	0.000100937	0.000332295	0.0065139	0.822919	Y
FUCCAT.PWY..fucose.degradation	0.000281054	0.000447958	0	3.86426e-05	0.000128521	0.000319152	0.00564392	0.883754	Y
PWY.6630..superpathway.of.L.tyrosine.biosynthesis	0.000280279	0.000747788	0	0	0	0.000159382	0.00702322	0.412167	Y
PWY.5189..tetrapyrrole.biosynthesis.II..from.glycine.	0.000256165	0.000559148	0	0	3.28469e-05	0.000162443	0.00626365	0.632398	Y
PWY.6892..thiazole.biosynthesis.I..E..coli.	0.000249813	0.00074532	0	0	4.59691e-05	0.000138	0.00889069	0.65079	Y
PWY.5840..superpathway.of.menaquinol.7.biosynthesis	0.000248577	0.000598525	0	0	0	0.000232191	0.00664693	0.463334	Y
PPGPPMET.PWY..ppGpp.biosynthesis	0.000247515	0.000451772	0	0	6.23621e-05	0.000261322	0.00684437	0.742985	Y
PWY.5941..glycogen.degradation.II..eukaryotic.	0.000244763	0.00029233	0	0	0.00017812	0.000351728	0.00429424	0.718227	Y
PWY.5005..biotin.biosynthesis.II	0.000236773	0.000309154	0	0	0.000141612	0.000366753	0.00623629	0.632516	Y
GLYCOCAT.PWY..glycogen.degradation.I..bacterial.	0.000183833	0.000276771	0	0	8.09385e-05	0.000230925	0.00238299	0.735676	Y
PWY.6891..thiazole.biosynthesis.II..Bacillus.	0.000176588	0.000639641	0	0	0	5.37384e-05	0.0081227	0.373615	Y
PWY.6612..superpathway.of.tetrahydrofolate.biosynthesis	0.000173072	0.000333425	0	0	6.62148e-05	0.000190459	0.00393322	0.647607	Y
PWY.5505..L.glutamate.and.L.glutamine.biosynthesis	0.000172541	0.000275047	0	0	5.88953e-05	0.000226383	0.00347638	0.649847	Y
PWY.5850..superpathway.of.menaquinol.6.biosynthesis.I	0.000168819	0.000583323	0	0	0	0	0.00664693	0.213747	Y
PWY.5845..superpathway.of.menaquinol.9.biosynthesis	0.000168438	0.000583365	0	0	0	0	0.00664693	0.210564	Y
PWY.5896..superpathway.of.menaquinol.10.biosynthesis	0.000168428	0.000583367	0	0	0	0	0.00664693	0.210446	Y
FERMENTATION.PWY..mixed.acid.fermentation	0.000162843	0.000365994	0	0	5.34413e-05	0.000154964	0.00490537	0.69005	Y
PWY.3781..aerobic.respiration.I..cytochrome.c.	0.00015768	0.000597686	0	0	0	3.91371e-05	0.0118555	0.300047	Y
PWY.5861..superpathway.of.demethylmenaquinol.8.biosynthesis	0.000154635	0.000518693	0	0	0	6.15242e-05	0.00598686	0.316906	Y
P105.PWY..TCA.cycle.IV..2.oxoglutarate.decarboxylase.	0.00015319	0.000487464	0	0	0	8.62777e-05	0.00568441	0.406862	Y
FUC.RHAMCAT.PWY..superpathway.of.fucose.and.rhamnose.degradation	0.000148513	0.000385037	0	0	0	0.000129002	0.0040619	0.445768	Y
PWY.5918..superpathay.of.heme.biosynthesis.from.glutamate	0.000145896	0.000294696	0	0	3.21905e-05	0.000156234	0.00378911	0.543386	Y
P164.PWY..purine.nucleobases.degradation.I..anaerobic.	0.000138197	0.000211026	0	0	0	0.000231456	0.00185592	0.460033	Y
PWY_TCA.GLYOX.BYPASS..superpathway.of.glyoxylate.bypass.and.TCA	0.00013644	0.00044953	0	0	0	6.50742e-05	0.00528395	0.477718	Y
PWY.5791..1.4.dihydroxy.2.naphthoate.biosynthesis.II..plants.	0.000132048	0.000390676	0	0	0	9.00753e-05	0.00526964	0.495166	Y
PWY.5837..1.4.dihydroxy.2.naphthoate.biosynthesis.I	0.000132048	0.000390676	0	0	0	9.00753e-05	0.00526964	0.495166	Y
PWY.7315..dTDP.N.acetylthomosamine.biosynthesis	0.000131136	0.000506518	0	0	0	4.195e-05	0.00573623	0.407687	Y
GLUCOSE1PMETAB.PWY..glucose.and.glucose.1.phosphate.degradation	0.000130894	0.000420223	0	0	0	5.6036e-05	0.00523036	0.488682	Y
PWY_GLYOXYLATE.BYPASS..glyoxylate.cycle	0.000128808	0.000426554	0	0	1.52906e-05	6.64013e-05	0.00478429	0.593846	Y
PWY.5862..superpathway.of.demethylmenaquinol.9.biosynthesis	0.000123605	0.000452069	0	0	0	0	0.00518731	0.210564	Y
FAO.PWY..fatty.acid..beta..oxidation.I	0.000121406	0.000260539	0	0	3.36132e-05	0.000109701	0.00284388	0.646074	Y
PWY.6629..superpathway.of.L.tryptophan.biosynthesis	0.000115004	0.000445967	0	0	0	0	0.00501831	0.212332	Y
PWY_NAD.BIOSYNTHESIS.II..NAD.salvage.pathway.II	0.000114414	0.000376013	0	0	0	5.04431e-05	0.00504939	0.478307	Y
PWY.6285..superpathway.of.fatty.acids.biosynthesis..E..coli.	0.000113645	0.000261059	0	0	0	0.000100693	0.0024834	0.262792	Y
NONMEVIPP.PWY..methylerythritol.phosphate.pathway.I	0.0185937	0.00449679	0.00448127	0.0158901	0.0179117	0.0205178	0.0624008	1	Y
PEPTIDOGLYCANSYN.PWY..peptidoglycan.biosynthesis.I..meso.diaminopimelate.containing.	0.0205209	0.00367706	0.00256614	0.0183873	0.020323	0.0225362	0.0557006	1	Y
PWY.5686..UMP.biosynthesis	0.0204151	0.0046394	0.00591111	0.0179309	0.0198607	0.022254	0.0805676	1	Y
PWY.5695..urate.biosynthesis.inosine.5..phosphate.degradation	0.0142736	0.0030495	0.0018642	0.0122359	0.0142353	0.0161285	0.034843	1	Y
PWY.5838..superpathway.of.menaquinol.8.biosynthesis.I	0.000209776	0.000659734	0	0	0	9.20961e-05	0.00717446	0.316906	Y
PWY.6386..UDP.N.acetylmuramoyl.pentapeptide.biosynthesis.II..lysine.containing.	0.0210375	0.00369521	0.00210149	0.0189424	0.0208372	0.0230102	0.0564077	1	Y
PWY.6387..UDP.N.acetylmuramoyl.pentapeptide.biosynthesis.I..meso.diaminopimelate.containing.	0.0205405	0.00355751	0.00210409	0.0185413	0.0203938	0.0224557	0.0560356	1	Y
PWY.7219..adenosine.ribonucleotides.de.novo.biosynthesis	0.027183	0.00639993	0.00659019	0.0237152	0.0262565	0.0296038	0.131407	1	Y
PWY.7221..guanosine.ribonucleotides.de.novo.biosynthesis	0.0194041	0.00502578	0.00559015	0.0166932	0.0185429	0.0210778	0.0888699	1	Y
PWY_GLYCOLYSIS.TCA.GLYOX.BYPASS..superpathway.of.glycolysis..pyruvate.dehydrogenase..TCA..and.glyoxylate.bypass	0.000180735	0.000516506	0	0	0	0.00011656	0.00529593	0.473709	Y
PWY_HEME.BIOSYNTHESIS.II..heme.biosynthesis.I..aerobic.	0.000226625	0.000347447	0	0	9.80093e-05	0.000299923	0.00623366	0.744754	Y
PWY0.1061..superpathway.of.L.alanine.biosynthesis	0.000210081	0.00057413	0	0	3.52716e-05	0.000125481	0.0052441	0.64124	Y
PWY.6281..L.selenocysteine.biosynthesis.II..archaea.and.eukaryotes.	1.65398e-07	4.6655e-06	0	0	0	0	0.000276145	0.00200424	Y
DENITRIFICATION.PWY..nitrate.reduction.I..denitrification.	3.03074e-09	2.79125e-07	0	0	0	0	2.57068e-05	0.000117897	Y
GALLATE.DEGRADATION.I.PWY..gallate.degradation.II	5.1549e-09	3.00242e-07	0	0	0	0	2.29964e-05	0.00035369	Y
GALLATE.DEGRADATION.II.PWY..gallate.degradation.I	1.23324e-08	8.63962e-07	0	0	0	0	7.3048e-05	0.000235793	Y
LEU.DEG2.PWY..L.leucine.degradation.I	1.42725e-07	3.97598e-06	0	0	0	0	0.000205538	0.00294742	Y
LIPASYN.PWY..phospholipases	1.77565e-07	3.69825e-06	0	0	0	0	0.000215867	0.00742749	Y
METH.ACETATE.PWY..methanogenesis.from.acetate	7.9762e-09	7.3459e-07	0	0	0	0	6.76541e-05	0.000117897	Y
METHANOGENESIS.PWY..methanogenesis.from.H2.and.CO2	4.92991e-07	1.1608e-05	0	0	0	0	0.000832904	0.013676	Y
METHYLGALLATE.DEGRADATION.PWY..methylgallate.degradation	6.43975e-09	3.75067e-07	0	0	0	0	2.8728e-05	0.00035369	Y
NADSYN.PWY..NAD.biosynthesis.II..from.tryptophan.	6.82513e-08	1.39805e-06	0	0	0	0	5.17047e-05	0.00294742	Y
PWY.7003..glycerol.degradation.to.butanol	9.94211e-05	0.000150546	0	0	4.4793e-05	0.000148854	0.00154033	0.531361	Y
PWY.5855..ubiquinol.7.biosynthesis..prokaryotic.	9.61175e-05	0.000332021	0	0	0	4.32402e-05	0.00682487	0.423367	Y
PWY.5856..ubiquinol.9.biosynthesis..prokaryotic.	9.61175e-05	0.000332021	0	0	0	4.32402e-05	0.00682487	0.423367	Y
PWY.5857..ubiquinol.10.biosynthesis..prokaryotic.	9.61175e-05	0.000332021	0	0	0	4.32402e-05	0.00682487	0.423367	Y
PWY.6708..ubiquinol.8.biosynthesis..prokaryotic.	9.61175e-05	0.000332021	0	0	0	4.32402e-05	0.00682487	0.423367	Y
PWY.7254..TCA.cycle.VII..acetate.producers.	9.61031e-05	0.00033889	0	0	0	4.51301e-05	0.00446497	0.462037	Y
PWY0.1241..ADP.L.glycero..beta..D.manno.heptose.biosynthesis	9.52657e-05	0.0003025	0	0	7.88213e-06	4.63262e-05	0.00353979	0.536076	Y
PWY_REDCITCYC..TCA.cycle.VIII..helicobacter.	9.4926e-05	0.000292677	0	0	1.02806e-05	5.26189e-05	0.00341474	0.517567	Y
PWY.5913..TCA.cycle.VI..obligate.autotrophs.	9.06731e-05	0.000261058	0	0	1.22231e-05	7.34772e-05	0.00345278	0.587126	Y
PWY0.1533..methylphosphonate.degradation.I	8.61084e-05	0.00041586	0	0	0	1.60677e-05	0.00863734	0.33742	Y
PWY.5384..sucrose.degradation.IV..sucrose.phosphorylase.	8.37247e-05	0.000198332	0	0	1.8838e-05	7.39422e-05	0.00343807	0.636171	Y
CRNFORCAT.PWY..creatinine.degradation.I	8.0004e-05	9.59186e-05	0	0	5.95502e-05	0.000127112	0.00180408	0.607876	Y
PWY.7392..taxadiene.biosynthesis..engineered.	7.50562e-05	0.000209557	0	0	0	4.66257e-05	0.00222776	0.312898	Y
UBISYN.PWY..superpathway.of.ubiquinol.8.biosynthesis..prokaryotic.	7.19915e-05	0.000285617	0	0	0	1.88388e-05	0.00369008	0.286135	Y
PWY.7209..superpathway.of.pyrimidine.ribonucleosides.degradation	6.89435e-05	0.00011359	0	0	2.89423e-05	8.86464e-05	0.00194312	0.682858	Y
PWY.5173..superpathway.of.acetyl.CoA.biosynthesis	6.76367e-05	0.000261296	0	0	3.33068e-06	3.82336e-05	0.00753894	0.516388	Y
ARGORNPROST.PWY..arginine..ornithine.and.proline.interconversion	6.07393e-05	0.000119695	0	0	0	7.63618e-05	0.00115347	0.39012	Y
PWY0.1277..3.phenylpropanoate.and.3..3.hydroxyphenyl.propanoate.degradation	6.07081e-05	0.000308829	0	0	0	0	0.00582378	0.190403	Y
PWY.6588..pyruvate.fermentation.to.acetone	5.94695e-05	9.60506e-05	0	0	2.52677e-05	8.00147e-05	0.00130378	0.570856	Y
PWY0.1415..superpathway.of.heme.biosynthesis.from.uroporphyrinogen.III	5.84004e-05	0.000158816	0	0	0	4.2574e-05	0.00235206	0.366895	Y
POLYISOPRENSYN.PWY..polyisoprenoid.biosynthesis..E..coli.	5.7042e-05	0.000204564	0	0	0	2.66053e-05	0.00266639	0.341311	Y
GLUCARDEG.PWY..D.glucarate.degradation.I	5.38826e-05	0.000262431	0	0	0	1.1843e-05	0.00861062	0.318203	Y
GALACTARDEG.PWY..D.galactarate.degradation.I	5.15144e-05	0.000243924	0	0	0	1.06618e-05	0.00436881	0.30995	Y
GLUCARGALACTSUPER.PWY..superpathway.of.D.glucarate.and.D.galactarate.degradation	5.15144e-05	0.000243924	0	0	0	1.06618e-05	0.00436881	0.30995	Y
KETOGLUCONMET.PWY..ketogluconate.metabolism	5.15011e-05	0.000146545	0	0	0	3.31165e-05	0.00179362	0.355812	Y
GOLPDLCAT.PWY..superpathway.of.glycerol.degradation.to.1.3.propanediol	4.99643e-05	0.000169347	0	0	1.96971e-05	5.71454e-05	0.00419476	0.543504	Y
ECASYN.PWY..enterobacterial.common.antigen.biosynthesis	4.9563e-05	0.000231165	0	0	0	0	0.00352808	0.216223	Y
PWY.6823..molybdenum.cofactor.biosynthesis	4.90475e-05	0.000233863	0	0	0	0	0.00349263	0.239448	Y
HCAMHPDEG.PWY..3.phenylpropanoate.and.3..3.hydroxyphenyl.propanoate.degradation.to.2.oxopent.4.enoate	4.64259e-05	0.000255467	0	0	0	0	0.00541976	0.206791	Y
PWY.6690..cinnamate.and.3.hydroxycinnamate.degradation.to.2.oxopent.4.enoate	4.64259e-05	0.000255467	0	0	0	0	0.00541976	0.206791	Y
P122.PWY..heterolactic.fermentation	4.56419e-05	0.000177053	0	0	0	2.02082e-05	0.00277565	0.301344	Y
AST.PWY..L.arginine.degradation.II..AST.pathway.	4.42945e-05	0.000207484	0	0	0	7.75351e-06	0.00419709	0.295921	Y
PWY.6263..superpathway.of.menaquinol.8.biosynthesis.II	4.35097e-05	0.000117562	0	0	0	3.46885e-05	0.00179833	0.286253	Y
ALL.CHORISMATE.PWY..superpathway.of.chorismate.metabolism	4.31891e-05	0.000194815	0	0	0	0	0.00313904	0.108347	Y
PWY.7446..sulfoglycolysis	3.91293e-05	0.000227688	0	0	0	0	0.00424699	0.216105	Y
PWY.6471..peptidoglycan.biosynthesis.IV..Enterococcus.faecium.	3.68537e-05	0.000126414	0	0	0	0	0.00297679	0.191936	Y
KDO.NAGLIPASYN.PWY..superpathway.of..Kdo.2.lipid.A.biosynthesis	3.60773e-05	0.000155187	0	0	0	3.11482e-06	0.00192248	0.250295	Y
ARGDEG.PWY..superpathway.of.L.arginine..putrescine..and.4.aminobutanoate.degradation	3.56546e-05	0.000195476	0	0	0	0	0.00282899	0.140415	Y
ORNARGDEG.PWY..superpathway.of.L.arginine.and.L.ornithine.degradation	3.56546e-05	0.000195476	0	0	0	0	0.00282899	0.140415	Y
GLYCOL.GLYOXDEG.PWY..superpathway.of.glycol.metabolism.and.degradation	3.52335e-05	0.000144819	0	0	0	1.00102e-05	0.00217981	0.324452	Y
P101.PWY..ectoine.biosynthesis	6.88902e-08	3.46141e-06	0	0	0	0	0.000299155	0.00117897	Y
ORNDEG.PWY..superpathway.of.ornithine.degradation	2.77939e-05	0.000148744	0	0	0	0	0.00227073	0.130512	Y
X3.HYDROXYPHENYLACETATE.DEGRADATION.PWY..4.hydroxyphenylacetate.degradation	2.67615e-05	0.000201085	0	0	0	0	0.00448267	0.0987975	Y
PWY.5920..superpathway.of.heme.biosynthesis.from.glycine	2.56353e-05	8.57916e-05	0	0	0	0	0.00120163	0.222825	Y
PWY.5088..L.glutamate.degradation.VIII..to.propanoate.	2.34136e-05	7.40183e-05	0	0	0	0	0.00122025	0.228012	Y
METHGLYUT.PWY..superpathway.of.methylglyoxal.degradation	2.07223e-05	9.17413e-05	0	0	0	0	0.00140407	0.210564	Y
P23.PWY..reductive.TCA.cycle.I	2.04555e-05	6.91986e-05	0	0	0	0	0.00128031	0.209385	Y
PWY0.321..phenylacetate.degradation.I..aerobic.	1.89304e-05	0.000128297	0	0	0	0	0.00212347	0.0766329	Y
P221.PWY..octane.oxidation	1.06192e-06	1.92559e-05	0	0	0	0	0.00104599	0.018274	Y
P562.PWY..myo.inositol.degradation.I	1.87777e-08	6.53728e-07	0	0	0	0	3.95317e-05	0.00129686	Y
PWY.5656..mannosylglycerate.biosynthesis.I	1.3588e-05	6.00392e-05	0	0	0	0	0.00149436	0.182504	Y
LPSSYN.PWY..superpathway.of.lipopolysaccharide.biosynthesis	1.34053e-05	0.000102315	0	0	0	0	0.00253208	0.0754539	Y
P621.PWY..nylon.6.oligomer.degradation	3.16004e-09	2.08463e-07	0	0	0	0	1.55732e-05	0.000235793	Y
PWY.1861..formaldehyde.assimilation.II..RuMP.Cycle.	1.17164e-05	4.35127e-05	0	0	0	0	0.000928701	0.124499	Y
PROTOCATECHUATE.ORTHO.CLEAVAGE.PWY..protocatechuate.degradation.II..ortho.cleavage.pathway.	1.13391e-05	0.000141062	0	0	0	0	0.00467237	0.028531	Y
P124.PWY..Bifidobacterium.shunt	9.19991e-06	3.77158e-05	0	0	0	0	0.000790663	0.0841783	Y
PWY.5415..catechol.degradation.I..meta.cleavage.pathway.	8.4305e-06	0.000107918	0	0	0	0	0.00402941	0.0213393	Y
PWY0.42..2.methylcitrate.cycle.I	8.12408e-06	7.05082e-05	0	0	0	0	0.0027062	0.0772224	Y
PWY.5747..2.methylcitrate.cycle.II	7.77141e-06	6.72474e-05	0	0	0	0	0.00265773	0.0835888	Y
AEROBACTINSYN.PWY..aerobactin.biosynthesis	6.49251e-06	4.84914e-05	0	0	0	0	0.00208417	0.125442	Y
PWY.7200..superpathway.of.pyrimidine.deoxyribonucleoside.salvage	5.16712e-06	0.000105664	0	0	0	0	0.00445375	0.0154445	Y
PWY0.41..allantoin.degradation.IV..anaerobic.	3.78187e-06	1.67455e-05	0	0	0	0	0.000349747	0.104103	Y
PWY.5675..nitrate.reduction.V..assimilatory.	3.32986e-06	2.77774e-05	0	0	0	0	0.00116157	0.070738	Y
PWY.7218..photosynthetic.3.hydroxybutanoate.biosynthesis..engineered.	3.20626e-06	5.33653e-05	0	0	0	0	0.00222374	0.016034	Y
CATECHOL.ORTHO.CLEAVAGE.PWY..catechol.degradation.to..beta..ketoadipate	3.08729e-06	3.88541e-05	0	0	0	0	0.00103728	0.0140297	Y
P163.PWY..L.lysine.fermentation.to.acetate.and.butanoate	2.93724e-06	2.92029e-05	0	0	0	0	0.00127663	0.0391417	Y
PWY.7374..1.4.dihydroxy.6.naphthoate.biosynthesis.I	2.92334e-06	2.85169e-05	0	0	0	0	0.000782127	0.0172129	Y
PWY.4361..S.methyl.5.thio..alpha..D.ribose.1.phosphate.degradation	1.84024e-06	3.8976e-05	0	0	0	0	0.00265746	0.0106107	Y
PWY.922..mevalonate.pathway.I	1.80466e-06	1.05149e-05	0	0	0	0	0.000230427	0.0572978	Y
PWY.2201..folate.transformations.I	1.62676e-06	2.15937e-05	0	0	0	0	0.000598243	0.0106107	Y
PWY.5028..L.histidine.degradation.II	1.57626e-06	3.02144e-05	0	0	0	0	0.00160388	0.018274	Y
PWY.7385..1.3.propanediol.biosynthesis..engineered.	1.56794e-06	2.67197e-05	0	0	0	0	0.00220201	0.0203961	Y
PWY.6165..chorismate.biosynthesis.II..archaea.	1.2781e-06	2.22961e-05	0	0	0	0	0.000919964	0.00919594	Y
PWY.6467..Kdo.transfer.to.lipid.IVA.III..Chlamydia.	1.24679e-06	2.30421e-05	0	0	0	0	0.00150624	0.0166234	Y
PWY0.881..superpathway.of.fatty.acid.biosynthesis.I..E..coli.	1.20676e-06	2.41827e-05	0	0	0	0	0.00115842	0.00565904	Y
URSIN.PWY..ureide.biosynthesis	1.13819e-06	1.30997e-05	0	0	0	0	0.000407648	0.0126149	Y
PWY.1541..superpathway.of.taurine.degradation	1.64999e-09	1.19689e-07	0	0	0	0	1.04315e-05	0.000235793	Y
PWY.5910..superpathway.of.geranylgeranyldiphosphate.biosynthesis.I..via.mevalonate.	1.05791e-06	7.87959e-06	0	0	0	0	0.000265956	0.0313605	Y
PWY.7007..methyl.ketone.biosynthesis	8.96611e-07	1.69838e-05	0	0	0	0	0.0011577	0.0127328	Y
PWY.6185..4.methylcatechol.degradation..ortho.cleavage.	8.85928e-07	1.44949e-05	0	0	0	0	0.000552946	0.00837067	Y
PWY.7294..xylose.degradation.IV	8.76436e-07	3.32754e-05	0	0	0	0	0.00286726	0.00636642	Y
PWY.7399..methylphosphonate.degradation.II	7.49426e-07	8.38363e-06	0	0	0	0	0.000305715	0.0168592	Y
RUMP.PWY..formaldehyde.oxidation.I	7.37997e-07	6.25847e-06	0	0	0	0	0.00018259	0.0203961	Y
PWY.5417..catechol.degradation.III..ortho.cleavage.pathway.	7.16976e-07	1.32085e-05	0	0	0	0	0.000524989	0.00577694	Y
PWY.5431..aromatic.compounds.degradation.via..beta..ketoadipate	7.16976e-07	1.32085e-05	0	0	0	0	0.000524989	0.00577694	Y
P125.PWY..superpathway.of..R.R..butanediol.biosynthesis	6.78055e-07	7.6274e-06	0	0	0	0	0.000429134	0.0241688	Y
PWY.6660..2.heptyl.3.hydroxy.4.1H..quinolone.biosynthesis	6.55773e-07	1.55004e-05	0	0	0	0	0.000930408	0.0133223	Y
PWY.7094..fatty.acid.salvage	6.49566e-07	8.92384e-06	0	0	0	0	0.000438247	0.0132044	Y
PWY.6662..superpathway.of.quinolone.and.alkylquinolone.biosynthesis	5.88513e-07	1.46002e-05	0	0	0	0	0.000879328	0.0112002	Y
PWY.7373..superpathway.of.demethylmenaquinol.6.biosynthesis.II	5.66903e-07	1.15861e-05	0	0	0	0	0.000712312	0.00789908	Y
ILEUDEG.PWY..L.isoleucine.degradation.I	5.63484e-07	7.95221e-06	0	0	0	0	0.000427198	0.00907805	Y
PWY.1622..formaldehyde.assimilation.I..serine.pathway.	8.79772e-08	4.38496e-06	0	0	0	0	0.000372289	0.00106107	Y
PWY.3661..glycine.betaine.degradation.I	4.47939e-07	7.00047e-06	0	0	0	0	0.000328675	0.011436	Y
PWY.4722..creatinine.degradation.II	3.88796e-08	2.10659e-06	0	0	0	0	0.000183454	0.000943174	Y
PWY.5080..very.long.chain.fatty.acid.biosynthesis.I	1.88304e-07	2.62426e-06	0	0	0	0	6.96228e-05	0.00801698	Y
PWY.5180..toluene.degradation.I..aerobic...via.o.cresol.	2.00618e-07	1.70706e-05	0	0	0	0	0.00156927	0.000471587	Y
PWY.5181..toluene.degradation.III..aerobic...via.p.cresol.	4.57707e-08	1.58651e-06	0	0	0	0	9.79136e-05	0.00117897	Y
PWY.5182..toluene.degradation.II..aerobic...via.4.methylcatechol.	2.00618e-07	1.70706e-05	0	0	0	0	0.00156927	0.000471587	Y
PWY.5198..factor.420.biosynthesis	3.00878e-07	7.46722e-06	0	0	0	0	0.000543388	0.0112002	Y
PWY.5265..peptidoglycan.biosynthesis.II..staphylococci.	2.96612e-07	7.69449e-06	0	0	0	0	0.000415655	0.00247583	Y
PWY.5306..superpathway.of.thiosulfate.metabolism..Desulfovibrio.sulfodismutans.	3.56055e-07	6.88989e-06	0	0	0	0	0.000271683	0.00459797	Y
PWY.5509..adenosylcobalamin.biosynthesis.from.cobyrinate.a.c.diamide.I	3.67187e-07	9.37122e-06	0	0	0	0	0.000394905	0.00212214	Y
PWY.5532..adenosine.nucleotides.degradation.IV	1.32349e-07	3.47484e-06	0	0	0	0	0.000142191	0.00188635	Y
PWY.5651..L.tryptophan.degradation.to.2.amino.3.carboxymuconate.semialdehyde	4.3157e-08	8.85522e-07	0	0	0	0	3.24419e-05	0.00294742	Y
PWY.5705..allantoin.degradation.to.glyoxylate.III	2.92469e-05	0.000127535	0	0	0	7.68172e-06	0.00219256	0.259962	Y
PWY.6107..chlorosalicylate.degradation	1.11369e-08	4.28198e-07	0	0	0	0	2.37916e-05	0.000825277	Y
PWY.6143..CMP.pseudaminate.biosynthesis	3.32951e-08	2.67318e-06	0	0	0	0	0.000245487	0.000589484	Y
PWY.6145..superpathway.of.sialic.acids.and.CMP.sialic.acids.biosynthesis	7.3021e-08	2.13329e-06	0	0	0	0	0.000103417	0.00224004	Y
PWY.6167..flavin.biosynthesis.II..archaea.	4.82939e-07	1.67575e-05	0	0	0	0	0.00123712	0.00259373	Y
PWY.6182..superpathway.of.salicylate.degradation	3.35995e-08	2.10963e-06	0	0	0	0	0.000178922	0.000471587	Y
PWY.6269..adenosylcobalamin.salvage.from.cobinamide.II	1.6655e-07	6.8346e-06	0	0	0	0	0.000480509	0.000943174	Y
PWY.6395..superpathway.of.seleno.compound.metabolism	7.10191e-09	4.68842e-07	0	0	0	0	3.51355e-05	0.000235793	Y
PWY.6396..superpathway.of.2.3.butanediol.biosynthesis	9.23438e-09	3.97197e-07	0	0	0	0	2.12754e-05	0.000589484	Y
PWY.6470..peptidoglycan.biosynthesis.V...beta..lactam.resistance.	2.19476e-08	1.48219e-06	0	0	0	0	0.000118655	0.000235793	Y
PWY.6654..phosphopantothenate.biosynthesis.III	4.98561e-08	1.99383e-06	0	0	0	0	0.000146804	0.00106107	Y
PWY.6731..starch.degradation.III	1.2361e-05	4.1206e-05	0	0	0	0	0.00102586	0.215397	Y
PWY.6749..CMP.legionaminate.biosynthesis.I	2.3549e-08	8.60871e-07	0	0	0	0	4.6908e-05	0.000825277	Y
PWY.6863..pyruvate.fermentation.to.hexanol	2.23592e-09	2.05923e-07	0	0	0	0	1.8965e-05	0.000117897	Y
PWY.6876..isopropanol.biosynthesis	2.4943e-08	1.00224e-06	0	0	0	0	5.24873e-05	0.00070738	Y
PWY.6948..sitosterol.degradation.to.androstenedione	2.01859e-07	1.34881e-05	0	0	0	0	0.0012102	0.000825277	Y
PWY.6992..1.5.anhydrofructose.degradation	3.25606e-07	1.21616e-05	0	0	0	0	0.000854695	0.00141476	Y
PWY.7013..L.1.2.propanediol.degradation	9.39574e-05	0.000516881	0	0	0	0	0.00961459	0.203843	Y
PWY.7031..protein.N.glycosylation..bacterial.	2.9423e-08	2.36588e-06	0	0	0	0	0.000216995	0.000471587	Y
PWY.7036..very.long.chain.fatty.acid.biosynthesis.II	1.21913e-07	2.12018e-06	0	0	0	0	5.85436e-05	0.00424428	Y
PWY.7090..UDP.2.3.diacetamido.2.3.dideoxy..alpha..D.mannuronate.biosynthesis	2.9408e-08	1.6959e-06	0	0	0	0	0.00014772	0.00070738	Y
PWY.7124..ethylene.biosynthesis.V..engineered.	9.009e-08	2.88893e-06	0	0	0	0	0.000190359	0.00153266	Y
PWY.7165..L.ascorbate.biosynthesis.VI..engineered.pathway.	1.11508e-09	1.02697e-07	0	0	0	0	9.45814e-06	0.000117897	Y
PWY.7185..UTP.and.CTP.dephosphorylation.I	2.69022e-07	6.6979e-06	0	0	0	0	0.00028736	0.00259373	Y
PWY.7224..purine.deoxyribonucleosides.salvage	1.81194e-09	1.66875e-07	0	0	0	0	1.53688e-05	0.000117897	Y
PWY.7286..7..3.amino.3.carboxypropyl..wyosine.biosynthesis	4.33922e-07	7.91985e-06	0	0	0	0	0.000536866	0.0155624	Y
PWY.7290..Escherichia.coli.serotype.O86.O.antigen.biosynthesis	6.41035e-08	2.55576e-06	0	0	0	0	0.000195034	0.00153266	Y
PWY.7316..dTDP.N.acetylviosamine.biosynthesis	2.24439e-07	9.41889e-06	0	0	0	0	0.000775039	0.00212214	Y
PWY.7332..superpathway.of.UDP.N.acetylglucosamine.derived.O.antigen.building.blocks.biosynthesis	9.58427e-08	6.82341e-06	0	0	0	0	0.000617173	0.000471587	Y
PWY.735..jasmonic.acid.biosynthesis	3.46705e-09	3.19308e-07	0	0	0	0	2.94075e-05	0.000117897	Y
PWY.7391..isoprene.biosynthesis.II..engineered.	2.27402e-07	3.15608e-06	0	0	0	0	0.000136184	0.00860646	Y
PWY.7398..coumarins.biosynthesis..engineered.	3.15713e-09	2.32313e-07	0	0	0	0	2.04338e-05	0.000235793	Y
PWY.7431..aromatic.biogenic.amine.degradation..bacteria.	1.71803e-07	5.1674e-06	0	0	0	0	0.00036179	0.00436218	Y
PWY.7527..L.methionine.salvage.cycle.III	1.29863e-07	3.69129e-06	0	0	0	0	0.000180745	0.00200424	Y
PWY.7528..L.methionine.salvage.cycle.I..bacteria.and.plants.	8.39194e-08	3.95887e-06	0	0	0	0	0.00024932	0.00070738	Y
PWY.7616..methanol.oxidation.to.carbon.dioxide	1.25369e-08	4.00165e-07	0	0	0	0	2.02515e-05	0.00117897	Y
PWY.7626..bacilysin.biosynthesis	4.83192e-09	3.14838e-07	0	0	0	0	2.11998e-05	0.000235793	Y
PWY_CHLOROPHYLL.SYN..chlorophyllide.a.biosynthesis.I..aerobic..light.dependent.	1.03104e-08	5.49843e-07	0	0	0	0	3.16309e-05	0.00035369	Y
PWY_MANNOSYL.CHITO.DOLICHOL.BIOSYNTHESIS..protein.N.glycosylation..eukaryotic..high.mannose.	2.28518e-08	6.79617e-07	0	0	0	0	3.27082e-05	0.00141476	Y
PWY0.1338..polymyxin.resistance	2.91228e-05	0.000143808	0	0	0	4.47809e-06	0.00242099	0.284956	Y
PWY1G.0..mycothiol.biosynthesis	1.19325e-08	4.00936e-07	0	0	0	0	2.41718e-05	0.00106107	Y
PWY3O.1109..superpathway.of.4.hydroxybenzoate.biosynthesis..yeast.	1.966e-09	1.81064e-07	0	0	0	0	1.66756e-05	0.000117897	Y
PWY66.3..cholesterol.biosynthesis.II..via.24.25.dihydrolanosterol.	2.17244e-09	2.00077e-07	0	0	0	0	1.84266e-05	0.000117897	Y
PWY66.4..cholesterol.biosynthesis.III..via.desmosterol.	4.19368e-09	2.79995e-07	0	0	0	0	2.181e-05	0.000235793	Y
TEICHOICACID.PWY..teichoic.acid..poly.glycerol..biosynthesis	4.97091e-07	5.02241e-06	0	0	0	0	0.000130689	0.0162697	Y
THREOCAT.PWY..superpathway.of.L.threonine.metabolism	6.99566e-08	4.1616e-06	0	0	0	0	0.000365537	0.00070738	Y
TYRFUMCAT.PWY..L.tyrosine.degradation.I	2.07612e-07	4.74552e-06	0	0	0	0	0.000304279	0.00636642	Y
VALDEG.PWY..L.valine.degradation.I	4.03781e-07	1.01276e-05	0	0	0	0	0.000621499	0.00860646	Y
X7ALPHADEHYDROX.PWY..cholate.degradation..bacteria..anaerobic.	4.0934e-08	2.84761e-06	0	0	0	0	0.000251611	0.000471587	Y

## Sheet: S1C
Supplementary Table: Summary statistics of microbiome data (antibiotic resistance genes)
Antibiotic resistance gene family	Mean.Ab	SD.Ab	Min.Ab	Q1.Ab	Median.Ab	Q3.Ab	Max.Ab	Prevalence	Gene_ID	Description	Drug_Class	Mechanism
CARD.ARO_3000194	0.199007	0.169752	0	0.0618371	0.15421	0.295832	0.944006	0.995048	ACA23185.1	tetracycline-resistant ribosomal protection protein	tetracycline antibiotic	antibiotic target protection
CARD.ARO_3000191	0.195234	0.196384	0	0.0349109	0.131808	0.305334	0.981349	0.874676	CAA79727.1	tetracycline-resistant ribosomal protection protein	tetracycline antibiotic	antibiotic target protection
CARD.ARO_3003097	0.123115	0.193106	0	0	0.0312345	0.158821	0.998051	0.736972	ACT97371.1	CfxA beta-lactamase	cephamycin	antibiotic inactivation
CARD.ARO_3000190	0.0474424	0.0659902	0	0.00809	0.025495	0.0596349	0.864674	0.900377	AAA23033.2	tetracycline-resistant ribosomal protection protein	tetracycline antibiotic	antibiotic target protection
CARD.ARO_3002999	0.0459956	0.0728659	0	0.00604862	0.0212813	0.0534406	0.96656	0.912403	ACT97415.1	CblA beta-lactamase	cephalosporin	antibiotic inactivation
CARD.ARO_3000498	0.0412118	0.0908508	0	0	0.00401851	0.0341175	0.922732	0.617897	AAA88675.1	Erm 23S ribosomal RNA methyltransferase	macrolide antibiotic;lincosamide antibiotic;streptogramin antibiotic	antibiotic target alteration
CARD.ARO_3000567	0.0366054	0.0527907	0	0.00510448	0.0168996	0.0452085	0.623481	0.935393	AFK31666.1	major facilitator superfamily (MFS) antibiotic efflux pump	tetracycline antibiotic	antibiotic efflux
CARD.ARO_3002930	0.0310092	0.0684352	0	0	0.00575426	0.0280599	0.946027	0.661165	AHA41505.1	glycopeptide resistance gene cluster;vanR	glycopeptide antibiotic	antibiotic target alteration
CARD.ARO_3002837	0.0282504	0.0728314	0	0	0.0041599	0.0218512	0.899376	0.63228	AAY32951.1	lincosamide nucleotidyltransferase (LNU)	lincosamide antibiotic	antibiotic inactivation
CARD.ARO_3000412	0.0227364	0.0671316	0	0	0	0.00883705	0.870433	0.36548	AAL59753.1	sulfonamide resistant sul	sulfonamide antibiotic;sulfone antibiotic	antibiotic target replacement
CARD.ARO_3000196	0.0106395	0.0221125	0	0	0.00327692	0.0119633	0.532415	0.6278	CAC41371.2	tetracycline-resistant ribosomal protection protein	tetracycline antibiotic	antibiotic target protection
CARD.ARO_3000375	0.0102909	0.0272719	0	0	0.00270254	0.00955404	0.74405	0.694176	AAF86219.1	Erm 23S ribosomal RNA methyltransferase	macrolide antibiotic;lincosamide antibiotic;streptogramin antibiotic	antibiotic target alteration
CARD.ARO_3000615	0.0100714	0.0313833	0	0	0.000189497	0.00650952	0.643288	0.505659	YP_008997285.1	major facilitator superfamily (MFS) antibiotic efflux pump	macrolide antibiotic	antibiotic efflux
CARD.ARO_3003369	0.00990252	0.0266954	0	0	0	0.00582422	0.455069	0.261259	AAN82549.1	elfamycin resistant EF-Tu	elfamycin antibiotic	antibiotic target alteration
CARD.ARO_3002628	0.00973485	0.0325384	0	0	0	0.00127491	0.738149	0.252417	AAU10334.1	ANT(6)	aminoglycoside antibiotic	antibiotic inactivation
CARD.ARO_3002647	0.00947256	0.0283789	0	0	0.00212514	0.00760637	0.811183	0.704433	AGV10830.1	APH(3')	aminoglycoside antibiotic	antibiotic inactivation
CARD.ARO_3000522	0.00663107	0.0337673	0	0	0	0	0.808383	0.186041	AAC37034.1	Erm 23S ribosomal RNA methyltransferase	macrolide antibiotic;lincosamide antibiotic;streptogramin antibiotic	antibiotic target alteration
CARD.ARO_3003890	0.00570655	0.0160245	0	0	0	0	0.275005	0.224357	CDJ73208	UhpT	fosfomycin	antibiotic target alteration
CARD.ARO_3002639	0.00561876	0.019333	0	0	0	0.00118861	0.288369	0.278354	ABK33456.1	APH(3'')	aminoglycoside antibiotic	antibiotic inactivation
CARD.ARO_3003167	0.00485173	0.0193892	0	0	0	0.00210586	0.50871	0.369724	AJO16046.1	CTX-M beta-lactamase	cephalosporin	antibiotic inactivation
CARD.ARO_3002688	0.0045098	0.028143	0	0	0	0	0.693537	0.104339	CAA52904.1	chloramphenicol acetyltransferase (CAT)	phenicol antibiotic	antibiotic inactivation
CARD.ARO_3003316	0.00418364	0.0126681	0	0	0	0	0.178723	0.16034	WP_000195296.1	fluoroquinolone resistant parE	fluoroquinolone antibiotic	antibiotic target alteration
CARD.ARO_3000491	0.00412105	0.0119909	0	0	0	0	0.22369	0.16199	YP_490697.1	resistance-nodulation-cell division (RND) antibiotic efflux pump	aminoglycoside antibiotic	antibiotic efflux
CARD.ARO_3000830	0.00407591	0.0113795	0	0	0	0	0.155591	0.17319	NP_312864.1	resistance-nodulation-cell division (RND) antibiotic efflux pump	aminoglycoside antibiotic;aminocoumarin antibiotic	antibiotic efflux
CARD.ARO_3002660	0.00393062	0.0134833	0	0	0	0.000628259	0.188909	0.266682	AAC23556.1	APH(6)	aminoglycoside antibiotic	antibiotic inactivation
CARD.ARO_3003893	0.00367621	0.00885132	0	0	0	0.00299912	0.189801	0.316671	CDJ73205	UhpT;UhpA	fosfomycin	antibiotic target alteration
CARD.ARO_3002867	0.0036119	0.012268	0	0	0	0.00269759	0.351267	0.469583	AAD01868.1	trimethoprim resistant dihydrofolate reductase dfr	diaminopyrimidine antibiotic	antibiotic target replacement
CARD.ARO_3003900	0.00351922	0.0104196	0	0	0	0	0.215195	0.162344	CDJ73082	cya adenylate cyclase	fosfomycin	antibiotic target alteration
CARD.ARO_3003288	0.00349204	0.00831356	0	0	0	0	0.132659	0.228602	NP_312937.1	rifamycin-resistant beta-subunit of RNA polymerase (rpoB)	peptide antibiotic;rifamycin antibiotic	antibiotic target alteration;antibiotic target replacement
CARD.ARO_3002897	0.00324915	0.0102302	0	0	0.000444997	0.00246135	0.243187	0.56449	AAB53445.1	streptothricin acetyltransferase (SAT)	nucleoside antibiotic	antibiotic inactivation
CARD.ARO_3002986	0.00310879	0.00845216	0	0	0	0	0.076524	0.15975	AAC76093.1	undecaprenyl pyrophosphate related proteins	peptide antibiotic	antibiotic target alteration
CARD.ARO_3000074	0.00303349	0.00847666	0	0	0	0	0.109585	0.154209	AAC75733.1	major facilitator superfamily (MFS) antibiotic efflux pump	fluoroquinolone antibiotic	antibiotic efflux
CARD.ARO_3003775	0.0029231	0.0086424	0	0	0	0	0.159249	0.149611	AIL15701	murA transferase	fosfomycin	antibiotic target alteration
CARD.ARO_3004454	0.00279688	0.0216688	0	0	0	0	0.725207	0.0911342	AAA23018.1	chloramphenicol acetyltransferase (CAT)	phenicol antibiotic	antibiotic inactivation
CARD.ARO_3003559	0.00264043	0.017967	0	0	0	0	0.736236	0.103749	AAA21532.1	cepA beta-lactamase	cephalosporin	antibiotic inactivation
CARD.ARO_3003889	0.00258822	0.00668103	0	0	0	0	0.0651967	0.192879	CDJ72593	GlpT	fosfomycin	antibiotic target alteration
CARD.ARO_3004049	0.00249124	0.00716546	0	0	0	0	0.0820831	0.144541	NP_415611.1	antibiotic resistance fabG	triclosan	antibiotic target alteration
CARD.ARO_3004126	0.00246928	0.00769763	0	0	0	0	0.215195	0.138175	BAB38442	Sugar Porin (SP)	fluoroquinolone antibiotic;tetracycline antibiotic	reduced permeability to antibiotic;resistance by absence
CARD.ARO_3000792	0.00245791	0.00744664	0	0	0	0	0.169568	0.138293	AAC75135.2	resistance-nodulation-cell division (RND) antibiotic efflux pump	aminocoumarin antibiotic	antibiotic efflux
CARD.ARO_3003386	0.00244359	0.00723472	0	0	0	0	0.0848454	0.135817	WP_000764731.1	sulfonamide resistant dihydropteroate synthase folP	sulfonamide antibiotic;sulfone antibiotic	antibiotic target alteration
CARD.ARO_3000793	0.00243113	0.0072961	0	0	0	0	0.0996701	0.13511	AAC75136.1	resistance-nodulation-cell division (RND) antibiotic efflux pump	aminocoumarin antibiotic	antibiotic efflux
CARD.ARO_3003381	0.00223112	0.00639397	0	0	0	0	0.137971	0.184273	AAC77033.1	ATP-binding cassette (ABC) antibiotic efflux pump;major facilitator superfamily (MFS) antibiotic efflux pump;resistance-nodulation-cell division (RND) antibiotic efflux pump	fluoroquinolone antibiotic;cephalosporin;glycylcycline;penam;tetracycline antibiotic;rifamycin antibiotic;phenicol antibiotic;triclosan	antibiotic target alteration;antibiotic efflux
CARD.ARO_3000499	0.0021131	0.0064383	0	0	0	0	0.0641048	0.126975	AAC76297.1	resistance-nodulation-cell division (RND) antibiotic efflux pump	fluoroquinolone antibiotic;cephalosporin;cephamycin;penam	antibiotic efflux
CARD.ARO_3003550	0.00207134	0.0054499	0	0	0	0	0.0556303	0.182858	BAE78082.1	major facilitator superfamily (MFS) antibiotic efflux pump	nucleoside antibiotic;acridine dye	antibiotic efflux
CARD.ARO_3000216	0.00205274	0.00623548	0	0	0	0	0.0751692	0.126503	NP_414995.1	resistance-nodulation-cell division (RND) antibiotic efflux pump	fluoroquinolone antibiotic;cephalosporin;glycylcycline;penam;tetracycline antibiotic;rifamycin antibiotic;phenicol antibiotic;triclosan	antibiotic efflux
CARD.ARO_3000518	0.00190342	0.00559981	0	0	0	0.000529812	0.126946	0.251592	BAE77933.1	resistance-nodulation-cell division (RND) antibiotic efflux pump	macrolide antibiotic;fluoroquinolone antibiotic;penam	antibiotic efflux
CARD.ARO_3000263	0.00182185	0.00626351	0	0	0	0	0.185899	0.14407	YP_489794.1	resistance-nodulation-cell division (RND) antibiotic efflux pump;General Bacterial Porin with reduced permeability to beta-lactams	fluoroquinolone antibiotic;monobactam;carbapenem;cephalosporin;glycylcycline;cephamycin;penam;tetracycline antibiotic;rifamycin antibiotic;phenicol antibiotic;triclosan;penem	antibiotic efflux;reduced permeability to antibiotic
CARD.ARO_3003549	0.00178516	0.00399401	0	0	0	0.0012738	0.0438077	0.310304	BAE78083.1	major facilitator superfamily (MFS) antibiotic efflux pump	nucleoside antibiotic;acridine dye	antibiotic efflux
CARD.ARO_3000502	0.00178413	0.00579053	0	0	0	0	0.0798524	0.114124	AAC76298.1	resistance-nodulation-cell division (RND) antibiotic efflux pump	fluoroquinolone antibiotic;cephalosporin;cephamycin;penam	antibiotic efflux
CARD.ARO_3001777	0.00174064	0.0149804	0	0	0	0	0.407838	0.0575336	AET35493.1	OXA beta-lactamase	cephalosporin;penam	antibiotic inactivation
CARD.ARO_3003303	0.0017165	0.00411915	0	0	0	0.000513034	0.0687393	0.253124	BAE77595.1	aminocoumarin resistant gyrB	aminocoumarin antibiotic	antibiotic target alteration
CARD.ARO_3000616	0.00170694	0.0132487	0	0	0	0	0.326069	0.0615421	WP_000420313.1	ABC-F ATP-binding cassette ribosomal protection protein	macrolide antibiotic;streptogramin antibiotic	antibiotic target protection
CARD.ARO_3003950	0.0016568	0.00517158	0	0	0	0	0.0518452	0.11825	NP_415434.1	ATP-binding cassette (ABC) antibiotic efflux pump	nitroimidazole antibiotic	antibiotic efflux
CARD.ARO_3000829	0.00161296	0.00609465	0	0	0	0	0.084798	0.0896015	BAA15934.1	resistance-nodulation-cell division (RND) antibiotic efflux pump	aminoglycoside antibiotic;aminocoumarin antibiotic	antibiotic efflux
CARD.ARO_3000516	0.00156275	0.00478254	0	0	0	0	0.124789	0.187102	NP_417169.1	major facilitator superfamily (MFS) antibiotic efflux pump	fluoroquinolone antibiotic	antibiotic efflux
CARD.ARO_3003548	0.00154041	0.00358884	0	0	0	0.00120055	0.0442812	0.291794	BAE78084.1	major facilitator superfamily (MFS) antibiotic efflux pump	nucleoside antibiotic;acridine dye	antibiotic efflux
CARD.ARO_3000027	0.00152753	0.00404072	0	0	0	0	0.0666079	0.18498	BAA16547.1	major facilitator superfamily (MFS) antibiotic efflux pump	fluoroquinolone antibiotic	antibiotic efflux
CARD.ARO_3001216	0.00148974	0.00368638	0	0	0	0.000193545	0.080086	0.250177	AAC74149.2	major facilitator superfamily (MFS) antibiotic efflux pump	fluoroquinolone antibiotic	antibiotic efflux
CARD.ARO_3003511	0.00143581	0.00329442	0	0	0	0.00121299	0.0430121	0.300519	NP_418486.1	ATP-binding cassette (ABC) antibiotic efflux pump;major facilitator superfamily (MFS) antibiotic efflux pump;resistance-nodulation-cell division (RND) antibiotic efflux pump;General Bacterial Porin with reduced permeability to beta-lactams	fluoroquinolone antibiotic;monobactam;carbapenem;cephalosporin;glycylcycline;cephamycin;penam;tetracycline antibiotic;rifamycin antibiotic;phenicol antibiotic;triclosan;penem	antibiotic target alteration;antibiotic efflux;reduced permeability to antibiotic
CARD.ARO_3003730	0.00143038	0.00794353	0	0	0	0	0.299295	0.113181	YP_003971446.1	antibiotic resistant isoleucyl-tRNA synthetase (ileS)	mupirocin	antibiotic target alteration
CARD.ARO_3003390	0.00136401	0.00516653	0	0	0	0	0.116483	0.102452	NP_415449.1	General Bacterial Porin with reduced permeability to beta-lactams	monobactam;carbapenem;cephalosporin;cephamycin;penam;penem	reduced permeability to antibiotic
CARD.ARO_3000794	0.00132921	0.00370202	0	0	0	0	0.0584103	0.185805	AAC75137.1	resistance-nodulation-cell division (RND) antibiotic efflux pump	aminocoumarin antibiotic	antibiotic efflux
CARD.ARO_3000024	0.00120441	0.00316926	0	0	0	0	0.0488471	0.194058	NP_417544.5	ATP-binding cassette (ABC) antibiotic efflux pump	fluoroquinolone antibiotic	antibiotic efflux
CARD.ARO_3003925	0.00116912	0.00860527	0	0	0	0	0.354218	0.0462155	WP_041918279.1	fluoroquinolone resistant parC	fluoroquinolone antibiotic	antibiotic target alteration
CARD.ARO_3003952	0.00110662	0.00335195	0	0	0	0	0.0573193	0.146781	NP_416715.1	ATP-binding cassette (ABC) antibiotic efflux pump	peptide antibiotic	antibiotic efflux
CARD.ARO_3000464	0.00108457	0.00709056	0	0	0	0	0.34637	0.103749	AAB57788.1	General Bacterial Porin with reduced permeability to beta-lactams	monobactam;carbapenem;cephalosporin;cephamycin;penam;tetracycline antibiotic;penem	reduced permeability to antibiotic
CARD.ARO_3000556	0.00106667	0.00544197	0	0	0	0	0.149166	0.151144	CBH51823.1	tetracycline-resistant ribosomal protection protein	tetracycline antibiotic	antibiotic target protection
CARD.ARO_3004042	0.00106112	0.00280032	0	0	0	0	0.0438077	0.204787	ABG77965.1	resistance-nodulation-cell division (RND) antibiotic efflux pump	fluoroquinolone antibiotic;cephalosporin;glycylcycline;penam;tetracycline antibiotic;rifamycin antibiotic;phenicol antibiotic;triclosan	antibiotic efflux
CARD.ARO_3000795	0.000989554	0.00268915	0	0	0	0	0.0275869	0.176963	BAE77781.1	resistance-nodulation-cell division (RND) antibiotic efflux pump	macrolide antibiotic;fluoroquinolone antibiotic;penam	antibiotic efflux
CARD.ARO_3002629	0.000978612	0.0100549	0	0	0	0	0.482923	0.0796982	CBH51824.1	ANT(6)	aminoglycoside antibiotic	antibiotic inactivation
CARD.ARO_3000237	0.000976307	0.00247292	0	0	0	0	0.0309767	0.203372	ACN32294.1	ATP-binding cassette (ABC) antibiotic efflux pump;major facilitator superfamily (MFS) antibiotic efflux pump;resistance-nodulation-cell division (RND) antibiotic efflux pump	macrolide antibiotic;fluoroquinolone antibiotic;cephalosporin;glycylcycline;cephamycin;penam;tetracycline antibiotic;aminocoumarin antibiotic;rifamycin antibiotic;phenicol antibiotic;triclosan	antibiotic efflux
CARD.ARO_3003585	0.000945468	0.00827775	0	0	0	0	0.191427	0.0261731	CDO13981.1	ATP-binding cassette (ABC) antibiotic efflux pump;pmr phosphoethanolamine transferase	macrolide antibiotic;peptide antibiotic	antibiotic target alteration;antibiotic efflux
CARD.ARO_3003841	0.000906498	0.00334293	0	0	0	0	0.0640581	0.110705	NP_415222.1	kdpDE	aminoglycoside antibiotic	antibiotic efflux
CARD.ARO_3003578	0.000880992	0.00206516	0	0	0	0.000608634	0.0388795	0.268333	AAC75314.1	pmr phosphoethanolamine transferase	peptide antibiotic	antibiotic target alteration
CARD.ARO_3000828	0.000877574	0.00213588	0	0	0	0	0.039217	0.248408	YP_490321.1	resistance-nodulation-cell division (RND) antibiotic efflux pump	aminoglycoside antibiotic;aminocoumarin antibiotic	antibiotic efflux
CARD.ARO_3000796	0.000813226	0.00225603	0	0	0	0	0.0258629	0.166352	AAC76539.1	resistance-nodulation-cell division (RND) antibiotic efflux pump	macrolide antibiotic;fluoroquinolone antibiotic;penam	antibiotic efflux
CARD.ARO_3001329	0.000795198	0.0023425	0	0	0	0	0.0530827	0.167531	ABV18113.1	major facilitator superfamily (MFS) antibiotic efflux pump	fosfomycin	antibiotic efflux
CARD.ARO_3003899	0.000784945	0.00243647	0	0	0	0	0.0445482	0.160104	CDJ72759	PtsI phosphotransferase	fosfomycin	antibiotic target alteration
CARD.ARO_3003576	0.000779147	0.00264324	0	0	0	0	0.0307957	0.110823	BAE78116.1	pmr phosphoethanolamine transferase	peptide antibiotic	antibiotic target alteration
CARD.ARO_3002612	0.000765936	0.00494521	0	0	0	0	0.171533	0.0760434	ACJ47200.1	ANT(3'')	aminoglycoside antibiotic	antibiotic inactivation
CARD.ARO_3003924	0.00071873	0.00538856	0	0	0	0	0.322339	0.09585	WP_014065640.1	fluoroquinolone resistant gyrA	fluoroquinolone antibiotic;nybomycin	antibiotic target alteration
CARD.ARO_3002686	0.000690655	0.00579468	0	0	0	0	0.150947	0.0542325	AAB51421.1	chloramphenicol acetyltransferase (CAT)	phenicol antibiotic	antibiotic inactivation
CARD.ARO_3000656	0.000689467	0.00229295	0	0	0	0	0.0298228	0.133577	AAC76296.1	resistance-nodulation-cell division (RND) antibiotic efflux pump	fluoroquinolone antibiotic;cephalosporin;glycylcycline;cephamycin;penam;tetracycline antibiotic;rifamycin antibiotic;phenicol antibiotic;triclosan	antibiotic efflux
CARD.ARO_3004114	0.000664225	0.0104748	0	0	0	0	0.591538	0.0300637	APB87301	General Bacterial Porin with reduced permeability to beta-lactams	monobactam;carbapenem;cephalosporin;cephamycin;penam;penem	reduced permeability to antibiotic
CARD.ARO_3003926	0.000625436	0.00397484	0	0	0	0	0.200323	0.116718	NP_461214.1	fluoroquinolone resistant gyrA	fluoroquinolone antibiotic;nybomycin	antibiotic target alteration
CARD.ARO_3004290	0.000611441	0.00215795	0	0	0	0	0.0841108	0.145602	NP_418574.1	ampC-type beta-lactamase	cephalosporin;penam	antibiotic inactivation
CARD.ARO_3003361	0.000610052	0.00244082	0	0	0	0	0.0464469	0.129804	AAB39605.1	elfamycin resistant EF-Tu	elfamycin antibiotic	antibiotic target alteration
CARD.ARO_3002525	0.000593541	0.00867197	0	0	0	0	0.334444	0.0249941	CCP42991.1	AAC(2')	aminoglycoside antibiotic	antibiotic inactivation
CARD.ARO_3000410	0.000555846	0.00458556	0	0	0	0	0.147782	0.049045	AEJ33969.1	sulfonamide resistant sul	sulfonamide antibiotic;sulfone antibiotic	antibiotic target replacement
CARD.ARO_3003807	0.000548951	0.00153938	0	0	0	0	0.0262846	0.170832	NP_414997.1	resistance-nodulation-cell division (RND) antibiotic efflux pump	fluoroquinolone antibiotic;cephalosporin;glycylcycline;penam;tetracycline antibiotic;rifamycin antibiotic;phenicol antibiotic;triclosan	antibiotic target alteration;antibiotic efflux
CARD.ARO_3003577	0.000529812	0.00280809	0	0	0	0	0.11314	0.0578873	AAC75089.1	pmr phosphoethanolamine transferase	peptide antibiotic	antibiotic target alteration
CARD.ARO_3001214	0.000520141	0.00183084	0	0	0	0	0.018462	0.113417	AAC77293.1	major facilitator superfamily (MFS) antibiotic efflux pump	fluoroquinolone antibiotic;lincosamide antibiotic;nucleoside antibiotic;acridine dye;phenicol antibiotic	antibiotic efflux
CARD.ARO_3000676	0.000457877	0.00176251	0	0	0	0	0.0542432	0.119429	NP_309766.1	major facilitator superfamily (MFS) antibiotic efflux pump;resistance-nodulation-cell division (RND) antibiotic efflux pump	macrolide antibiotic;fluoroquinolone antibiotic;cephalosporin;cephamycin;penam;tetracycline antibiotic	antibiotic efflux
CARD.ARO_3002950	0.000442892	0.00462319	0	0	0	0	0.182507	0.0253478	AAB05628.1	vanX;glycopeptide resistance gene cluster	glycopeptide antibiotic	antibiotic target alteration
CARD.ARO_3003820	0.000388084	0.0014104	0	0	0	0	0.0211419	0.110116	NP_416340.1	ATP-binding cassette (ABC) antibiotic efflux pump;pmr phosphoethanolamine transferase	macrolide antibiotic;peptide antibiotic	antibiotic target alteration;antibiotic efflux;resistance by absence
CARD.ARO_3000508	0.000364793	0.001102	0	0	0	0	0.023529	0.157628	YP_491919.1	resistance-nodulation-cell division (RND) antibiotic efflux pump	macrolide antibiotic;fluoroquinolone antibiotic;penam	antibiotic efflux
CARD.ARO_3002666	0.000350421	0.00377782	0	0	0	0	0.169016	0.0330111	AFJ11385.1	16S rRNA methyltransferase (G1405)	aminoglycoside antibiotic	antibiotic target alteration
CARD.ARO_3002644	0.000348152	0.0101971	0	0	0	0	0.702165	0.0165055	WP_000572405.1	APH(3')	aminoglycoside antibiotic	antibiotic inactivation
CARD.ARO_3003751	0.000338984	0.00158486	0	0	0	0	0.0438077	0.0694412	NP_415372.1	antibiotic resistant nfsA	nitrofuran antibiotic	antibiotic target alteration
CARD.ARO_3004039	0.000307077	0.00135364	0	0	0	0	0.0353068	0.0838246	CAA77936.1	small multidrug resistance (SMR) antibiotic efflux pump	macrolide antibiotic	antibiotic efflux
CARD.ARO_3003380	0.000296054	0.00295112	0	0	0	0	0.0703523	0.033129	ABR76005.1	resistance-nodulation-cell division (RND) antibiotic efflux pump	fluoroquinolone antibiotic;cephalosporin;glycylcycline;penam;tetracycline antibiotic;rifamycin antibiotic;phenicol antibiotic;triclosan	antibiotic target alteration;antibiotic efflux
CARD.ARO_3003209	0.00029459	0.00324707	0	0	0	0	0.0828639	0.0233436	AJE60855.1	fosfomycin thiol transferase	fosfomycin	antibiotic inactivation
CARD.ARO_3002597	0.000285279	0.00311673	0	0	0	0	0.136019	0.0308889	NP_863643.1	APH(2'');AAC(6')	aminoglycoside antibiotic	antibiotic inactivation
CARD.ARO_3002859	0.00028296	0.00214806	0	0	0	0	0.0553731	0.037727	ACI32877.1	trimethoprim resistant dihydrofolate reductase dfr	diaminopyrimidine antibiotic	antibiotic target replacement
CARD.ARO_3003922	0.000276263	0.00295691	0	0	0	0	0.0601097	0.0195709	YP_001693237.1	resistance-nodulation-cell division (RND) antibiotic efflux pump	fluoroquinolone antibiotic;glycylcycline;tetracycline antibiotic;diaminopyrimidine antibiotic;nitrofuran antibiotic	antibiotic efflux
CARD.ARO_3002972	0.000273798	0.00335908	0	0	0	0	0.111007	0.020514	ABA71733.1	glycopeptide resistance gene cluster;vanT	glycopeptide antibiotic	antibiotic target alteration
CARD.ARO_3000832	0.000270926	0.00135455	0	0	0	0	0.0307771	0.0680264	NP_311275.1	major facilitator superfamily (MFS) antibiotic efflux pump;resistance-nodulation-cell division (RND) antibiotic efflux pump	macrolide antibiotic;fluoroquinolone antibiotic;penam;tetracycline antibiotic	antibiotic efflux
CARD.ARO_3000013	0.000265342	0.00307509	0	0	0	0	0.146488	0.0259373	AHH83938.1	glycopeptide resistance gene cluster;van ligase	glycopeptide antibiotic	antibiotic target alteration
CARD.ARO_3003069	0.000261089	0.0032715	0	0	0	0	0.144362	0.0358406	ABA71732.1	glycopeptide resistance gene cluster;vanXY	glycopeptide antibiotic	antibiotic target alteration
CARD.ARO_3000254	0.000260941	0.00101949	0	0	0	0	0.014788	0.0807593	BAA11237.1	major facilitator superfamily (MFS) antibiotic efflux pump	tetracycline antibiotic	antibiotic efflux
CARD.ARO_3004127	0.000257351	0.000800451	0	0	0	0	0.0115892	0.142891	NP_310518	MipA-interacting Protein	fluoroquinolone antibiotic;aminoglycoside antibiotic	reduced permeability to antibiotic;resistance by absence
CARD.ARO_3003966	0.000241822	0.00242025	0	0	0	0	0.0554852	0.0225183	YP_005226137.1	General Bacterial Porin with reduced permeability to beta-lactams	monobactam;carbapenem;cephalosporin;cephamycin;penam;penem	reduced permeability to antibiotic;resistance by absence
CARD.ARO_3000578	0.000227945	0.00274359	0	0	0	0	0.124169	0.0284131	AAA22904.1	CcrA beta-lactamase	carbapenem	antibiotic inactivation
CARD.ARO_3004122	0.000219162	0.00209427	0	0	0	0	0.0419751	0.0240509	CAA09666.1	General Bacterial Porin with reduced permeability to beta-lactams	monobactam;carbapenem;cephalosporin;cephamycin;penam;penem	reduced permeability to antibiotic
CARD.ARO_3002641	0.000218119	0.00212783	0	0	0	0	0.0636329	0.0284131	CAE51638.1	APH(3')	aminoglycoside antibiotic	antibiotic inactivation
CARD.ARO_3004359	0.000214653	0.00184701	0	0	0	0	0.0793375	0.043386	CAB51471.1	ACI beta-lactamase	cephalosporin;penam	antibiotic inactivation
CARD.ARO_3003838	0.000214205	0.000920649	0	0	0	0	0.0152397	0.0864183	ANK04027.1	resistance-nodulation-cell division (RND) antibiotic efflux pump	macrolide antibiotic;fluoroquinolone antibiotic;penam	antibiotic efflux
CARD.ARO_3002705	0.000192983	0.00295828	0	0	0	0	0.126811	0.0147371	AAG16656.1	major facilitator superfamily (MFS) antibiotic efflux pump	phenicol antibiotic	antibiotic efflux
CARD.ARO_3002895	0.000189337	0.0018492	0	0	0	0	0.100854	0.0374912	BAD95494.1	streptothricin acetyltransferase (SAT)	nucleoside antibiotic	antibiotic inactivation
CARD.ARO_3003923	0.000184641	0.00183961	0	0	0	0	0.0356871	0.0224004	YP_001693238	resistance-nodulation-cell division (RND) antibiotic efflux pump	fluoroquinolone antibiotic;glycylcycline;tetracycline antibiotic;diaminopyrimidine antibiotic;nitrofuran antibiotic	antibiotic efflux
CARD.ARO_3000206	0.000182348	0.000741542	0	0	0	0	0.0114572	0.10092	BAA11236.1	major facilitator superfamily (MFS) antibiotic efflux pump	tetracycline antibiotic	antibiotic efflux
CARD.ARO_3002831	0.000178117	0.00185273	0	0	0	0	0.0654083	0.0444471	AMP35312.1	ABC-F ATP-binding cassette ribosomal protection protein	streptogramin antibiotic;pleuromutilin antibiotic	antibiotic target protection
CARD.ARO_3003374	0.00017774	0.00155848	0	0	0	0	0.0332658	0.0325395	CAC35723.1	resistance-nodulation-cell division (RND) antibiotic efflux pump	fluoroquinolone antibiotic;cephalosporin;glycylcycline;penam;tetracycline antibiotic;rifamycin antibiotic;phenicol antibiotic;triclosan	antibiotic target alteration;antibiotic efflux
CARD.ARO_3003297	0.000174937	0.00286102	0	0	0	0	0.199596	0.0174487	AAL82403.1	fluoroquinolone resistant gyrA	fluoroquinolone antibiotic;nybomycin	antibiotic target alteration
CARD.ARO_3002683	0.000174397	0.00248022	0	0	0	0	0.119616	0.0238151	CAA23899.1	chloramphenicol acetyltransferase (CAT)	phenicol antibiotic	antibiotic inactivation
CARD.ARO_3000167	0.000157193	0.0033203	0	0	0	0	0.183174	0.00919594	AAK97755.1	major facilitator superfamily (MFS) antibiotic efflux pump	tetracycline antibiotic	antibiotic efflux
CARD.ARO_3004041	0.000154531	0.00155591	0	0	0	0	0.0543	0.0253478	CAC41008.1	resistance-nodulation-cell division (RND) antibiotic efflux pump	fluoroquinolone antibiotic;cephalosporin;glycylcycline;penam;tetracycline antibiotic;rifamycin antibiotic;phenicol antibiotic;triclosan	antibiotic efflux
CARD.ARO_3000777	0.000137879	0.0031587	0	0	0	0	0.181624	0.00860646	CAJ77856.1	resistance-nodulation-cell division (RND) antibiotic efflux pump	fluoroquinolone antibiotic;tetracycline antibiotic	antibiotic efflux
CARD.ARO_3002909	0.000133254	0.00218179	0	0	0	0	0.12754	0.0174487	ABA71731.1	glycopeptide resistance gene cluster;van ligase	glycopeptide antibiotic	antibiotic target alteration
CARD.ARO_3002459	0.00011587	0.00136058	0	0	0	0	0.0371572	0.0189814	WP_032735535.1	LEN beta-lactamase	penam;penem	antibiotic inactivation
CARD.ARO_3000316	0.000106437	0.00167845	0	0	0	0	0.0930061	0.0304174	BAA03776.1	macrolide phosphotransferase (MPH)	macrolide antibiotic	antibiotic inactivation
CARD.ARO_3001338	0.000105649	0.00138446	0	0	0	0	0.0524309	0.0127328	CAQ03505.1	SHV beta-lactamase	carbapenem;cephalosporin;penam	antibiotic inactivation
CARD.ARO_3000230	0.000101227	0.00265373	0	0	0	0	0.191369	0.00483377	AAC64365.1	ANT(2'')	aminoglycoside antibiotic	antibiotic inactivation
CARD.ARO_3003955	9.34027e-05	0.00156402	0	0	0	0	0.11206	0.0254657	NP_217362.1	major facilitator superfamily (MFS) antibiotic efflux pump	rifamycin antibiotic;isoniazid	antibiotic efflux
CARD.ARO_3002372	9.21022e-05	0.00308734	0	0	0	0	0.251534	0.00389059	AAS48620.1	VEB beta-lactamase	monobactam;cephalosporin	antibiotic inactivation
CARD.ARO_3000168	8.91503e-05	0.00108028	0	0	0	0	0.0501276	0.0255836	CAE51745.1	major facilitator superfamily (MFS) antibiotic efflux pump	tetracycline antibiotic	antibiotic efflux
CARD.ARO_3003199	8.63067e-05	0.00101207	0	0	0	0	0.0429077	0.0282952	BAO21229.1	AAC(6')	aminoglycoside antibiotic	antibiotic inactivation
CARD.ARO_3003839	8.43701e-05	0.0019336	0	0	0	0	0.123109	0.0155624	AAS13767.1	macrolide phosphotransferase (MPH)	macrolide antibiotic	antibiotic inactivation
CARD.ARO_3002539	8.21925e-05	0.00209563	0	0	0	0	0.103	0.00459797	ABB43029.1	AAC(3)	aminoglycoside antibiotic	antibiotic inactivation
CARD.ARO_3000378	8.13837e-05	0.00112312	0	0	0	0	0.0317048	0.00825277	AAA74437.1	resistance-nodulation-cell division (RND) antibiotic efflux pump	macrolide antibiotic;fluoroquinolone antibiotic;monobactam;carbapenem;cephalosporin;cephamycin;penam;tetracycline antibiotic;peptide antibiotic;aminocoumarin antibiotic;diaminopyrimidine antibiotic;sulfonamide antibiotic;phenicol antibiotic;penem	antibiotic efflux
CARD.ARO_3002854	7.98811e-05	0.000786203	0	0	0	0	0.0223079	0.0193351	CAC19929.1	trimethoprim resistant dihydrofolate reductase dfr	diaminopyrimidine antibiotic	antibiotic target replacement
CARD.ARO_3002655	7.56739e-05	0.00159089	0	0	0	0	0.079835	0.0106107	CAA24743.1	APH(4)	aminoglycoside antibiotic	antibiotic inactivation
CARD.ARO_3000833	7.50827e-05	0.000504634	0	0	0	0	0.0103345	0.0321858	AAC75429.1	major facilitator superfamily (MFS) antibiotic efflux pump;resistance-nodulation-cell division (RND) antibiotic efflux pump	macrolide antibiotic;fluoroquinolone antibiotic;penam;tetracycline antibiotic	antibiotic efflux
CARD.ARO_3002635	7.40959e-05	0.00112752	0	0	0	0	0.0534269	0.0153266	AAK63040.1	APH(2'')	aminoglycoside antibiotic	antibiotic inactivation
CARD.ARO_3002415	6.98544e-05	0.00166582	0	0	0	0	0.0807574	0.00495166	CAI43424.1	OXY beta-lactamase	monobactam;cephalosporin;penam	antibiotic inactivation
CARD.ARO_3002932	6.82255e-05	0.00105847	0	0	0	0	0.0684904	0.0209856	AAB05623.1	vanS;glycopeptide resistance gene cluster	glycopeptide antibiotic	antibiotic target alteration
CARD.ARO_3000813	6.69987e-05	0.00190175	0	0	0	0	0.140526	0.0140297	ADT64081.1	resistance-nodulation-cell division (RND) antibiotic efflux pump	fluoroquinolone antibiotic;diaminopyrimidine antibiotic;phenicol antibiotic	antibiotic efflux
CARD.ARO_3000819	6.58624e-05	0.00108244	0	0	0	0	0.0343756	0.0122613	NP_252264.1	resistance-nodulation-cell division (RND) antibiotic efflux pump	macrolide antibiotic;fluoroquinolone antibiotic;monobactam;carbapenem;cephalosporin;cephamycin;penam;tetracycline antibiotic;peptide antibiotic;aminocoumarin antibiotic;diaminopyrimidine antibiotic;sulfonamide antibiotic;phenicol antibiotic;penem	antibiotic efflux
CARD.ARO_3000166	5.83013e-05	0.000835632	0	0	0	0	0.0372197	0.0206319	BAC67143.1	major facilitator superfamily (MFS) antibiotic efflux pump	tetracycline antibiotic	antibiotic efflux
CARD.ARO_3003308	5.75914e-05	0.00059758	0	0	0	0	0.0395335	0.0459797	AAC76055.1	fluoroquinolone resistant parC;fluoroquinolone self resistant parC	fluoroquinolone antibiotic	antibiotic target alteration
CARD.ARO_3004045	5.71529e-05	0.00119946	0	0	0	0	0.101759	0.035369	NP_415804.1	antibiotic resistant fabI	isoniazid;triclosan	antibiotic target alteration
CARD.ARO_3002756	5.49333e-05	0.00157178	0	0	0	0	0.108836	0.00459797	AEL31272.1	quinolone resistance protein (qnr)	fluoroquinolone antibiotic	antibiotic target protection
CARD.ARO_3001855	5.49271e-05	0.000950658	0	0	0	0	0.0349913	0.00778118	BAP68758.1	ACT beta-lactamase	carbapenem;cephalosporin;cephamycin;penam	antibiotic inactivation
CARD.ARO_3002669	5.45562e-05	0.000742543	0	0	0	0	0.047743	0.0384343	AGV10818.1	APH(2'')	aminoglycoside antibiotic	antibiotic inactivation
CARD.ARO_3004191	5.45321e-05	0.0013314	0	0	0	0	0.0597217	0.00294742	AAW34150.1	APH(2'')	aminoglycoside antibiotic	antibiotic inactivation
CARD.ARO_3002604	5.27372e-05	0.000892404	0	0	0	0	0.0410672	0.0073096	AAN34365.1	ANT(3'')	aminoglycoside antibiotic	antibiotic inactivation
CARD.ARO_3003968	4.58084e-05	0.000843608	0	0	0	0	0.0304209	0.00778118	YP_005228001.1	General Bacterial Porin with reduced permeability to beta-lactams	monobactam;carbapenem;cephalosporin;cephamycin;penam;penem	reduced permeability to antibiotic;resistance by absence
CARD.ARO_3000806	4.4483e-05	0.000657796	0	0	0	0	0.023226	0.0070738	NP_252894.1	resistance-nodulation-cell division (RND) antibiotic efflux pump	fluoroquinolone antibiotic;tetracycline antibiotic;acridine dye	antibiotic efflux
CARD.ARO_3003479	4.39496e-05	0.00081612	0	0	0	0	0.0492506	0.00931384	CAD09823.1	major facilitator superfamily (MFS) antibiotic efflux pump	glycylcycline;tetracycline antibiotic	antibiotic target alteration;antibiotic efflux
CARD.ARO_3003918	4.31838e-05	0.0010017	0	0	0	0	0.0644103	0.018274	CBL58181.1	amp acetyltransferase	aminoglycoside antibiotic	antibiotic inactivation
CARD.ARO_3003685	4.30553e-05	0.000697514	0	0	0	0	0.0232764	0.0070738	NP_253654.1	fluoroquinolone resistant parE	fluoroquinolone antibiotic	antibiotic target alteration
CARD.ARO_3004054	4.27912e-05	0.000602214	0	0	0	0	0.0176446	0.00789908	SIP52035.1	resistance-nodulation-cell division (RND) antibiotic efflux pump	macrolide antibiotic;fluoroquinolone antibiotic;monobactam;aminoglycoside antibiotic;carbapenem;cephalosporin;cephamycin;penam;tetracycline antibiotic;peptide antibiotic;aminocoumarin antibiotic;diaminopyrimidine antibiotic;sulfonamide antibiotic;phenicol antibiotic;penem	antibiotic efflux
CARD.ARO_3003378	4.25031e-05	0.00042173	0	0	0	0	0.0152417	0.0178024	AAC74603.2	resistance-nodulation-cell division (RND) antibiotic efflux pump	fluoroquinolone antibiotic;cephalosporin;glycylcycline;penam;tetracycline antibiotic;rifamycin antibiotic;phenicol antibiotic;triclosan	antibiotic target alteration;antibiotic efflux
CARD.ARO_3002676	3.99394e-05	0.000745301	0	0	0	0	0.0547776	0.0135581	YP_006965431.1	chloramphenicol acetyltransferase (CAT)	phenicol antibiotic	antibiotic inactivation
CARD.ARO_3000804	3.98046e-05	0.000589455	0	0	0	0	0.0239798	0.00825277	NP_251184.1	resistance-nodulation-cell division (RND) antibiotic efflux pump	fluoroquinolone antibiotic;diaminopyrimidine antibiotic;phenicol antibiotic	antibiotic efflux
CARD.ARO_3004032	3.97093e-05	0.000619505	0	0	0	0	0.0359184	0.0159161	AET10444.1	ATP-binding cassette (ABC) antibiotic efflux pump	tetracycline antibiotic	antibiotic efflux
CARD.ARO_3002872	3.8038e-05	0.000754162	0	0	0	0	0.0358331	0.00660222	AEG78825.1	fosfomycin thiol transferase	fosfomycin	antibiotic inactivation
CARD.ARO_3001796	3.76119e-05	0.000733946	0	0	0	0	0.0305027	0.00518746	AAQ76277.1	OXA beta-lactamase	cephalosporin;penam	antibiotic inactivation
CARD.ARO_3003702	3.6615e-05	0.000450714	0	0	0	0	0.0130382	0.0122613	BAA37152.1	fluoroquinolone resistant parC;fluoroquinolone resistant gyrA	fluoroquinolone antibiotic;nybomycin	antibiotic target alteration
CARD.ARO_3001970	3.58991e-05	0.000940671	0	0	0	0	0.0494883	0.00235793	AEM44648.1	CTX-M beta-lactamase	cephalosporin	antibiotic inactivation
CARD.ARO_3000379	3.54118e-05	0.000455036	0	0	0	0	0.0144603	0.0119076	NP_249118.1	resistance-nodulation-cell division (RND) antibiotic efflux pump	macrolide antibiotic;fluoroquinolone antibiotic;monobactam;aminoglycoside antibiotic;carbapenem;cephalosporin;cephamycin;penam;tetracycline antibiotic;peptide antibiotic;acridine dye;aminocoumarin antibiotic;diaminopyrimidine antibiotic;sulfonamide antibiotic;phenicol antibiotic;penem	antibiotic efflux
CARD.ARO_3004056	3.53458e-05	0.000796762	0	0	0	0	0.0444892	0.00565904	NP_252408.1	resistance-nodulation-cell division (RND) antibiotic efflux pump	macrolide antibiotic;fluoroquinolone antibiotic;monobactam;carbapenem;cephalosporin;cephamycin;penam;tetracycline antibiotic;peptide antibiotic;aminocoumarin antibiotic;diaminopyrimidine antibiotic;sulfonamide antibiotic;phenicol antibiotic;penem	antibiotic efflux
CARD.ARO_3003684	3.49235e-05	0.000511436	0	0	0	0	0.0248552	0.0106107	NP_251858.1	fluoroquinolone resistant gyrA	fluoroquinolone antibiotic;nybomycin	antibiotic target alteration
CARD.ARO_3000822	3.48942e-05	0.000613572	0	0	0	0	0.0301104	0.00542325	NP_358469.1	major facilitator superfamily (MFS) antibiotic efflux pump	fluoroquinolone antibiotic	antibiotic efflux
CARD.ARO_3001816	3.44586e-05	0.000892765	0	0	0	0	0.0380381	0.00330111	AAF86691.1	ACC beta-lactamase	monobactam;cephalosporin;penam	antibiotic inactivation
CARD.ARO_3002578	3.39201e-05	0.000960535	0	0	0	0	0.0526243	0.00176845	AKN19287.1	AAC(6')	aminoglycoside antibiotic	antibiotic inactivation
CARD.ARO_3002630	3.38724e-05	0.0013256	0	0	0	0	0.112874	0.00412639	AFU35063.1	ANT(9)	aminoglycoside antibiotic	antibiotic inactivation
CARD.ARO_3004038	3.3849e-05	0.000467007	0	0	0	0	0.0173819	0.0101391	NP_253677.1	small multidrug resistance (SMR) antibiotic efflux pump	aminoglycoside antibiotic	antibiotic efflux
CARD.ARO_3003710	3.35968e-05	0.000478846	0	0	0	0	0.0216905	0.0100212	NP_252368.1	resistance-nodulation-cell division (RND) antibiotic efflux pump	macrolide antibiotic;tetracycline antibiotic;triclosan	antibiotic efflux
CARD.ARO_3004059	3.30746e-05	0.000697178	0	0	0	0	0.0302948	0.00471587	NP_253290.1	resistance-nodulation-cell division (RND) antibiotic efflux pump	macrolide antibiotic;fluoroquinolone antibiotic;cephalosporin;penam;tetracycline antibiotic;aminocoumarin antibiotic;diaminopyrimidine antibiotic;phenicol antibiotic	antibiotic efflux
CARD.ARO_3003163	3.28915e-05	0.000865223	0	0	0	0	0.0426674	0.00259373	AIS67611.1	CTX-M beta-lactamase	cephalosporin	antibiotic inactivation
CARD.ARO_3000805	3.22352e-05	0.000551945	0	0	0	0	0.0372828	0.00966753	NP_251185.1	resistance-nodulation-cell division (RND) antibiotic efflux pump	fluoroquinolone antibiotic;diaminopyrimidine antibiotic;phenicol antibiotic	antibiotic efflux
CARD.ARO_3004033	3.19865e-05	0.000391844	0	0	0	0	0.0166598	0.016034	AET10445.1	ATP-binding cassette (ABC) antibiotic efflux pump	tetracycline antibiotic	antibiotic efflux
CARD.ARO_3002626	3.189e-05	0.00116513	0	0	0	0	0.100929	0.00530535	YP_008997281.1	ANT(6)	aminoglycoside antibiotic	antibiotic inactivation
CARD.ARO_3004069	3.17337e-05	0.000483648	0	0	0	0	0.0223697	0.00943174	NP_253005.1	resistance-nodulation-cell division (RND) antibiotic efflux pump	fluoroquinolone antibiotic;diaminopyrimidine antibiotic;phenicol antibiotic	antibiotic efflux
CARD.ARO_3003895	3.16254e-05	0.000507804	0	0	0	0	0.0217998	0.00695591	NP_249870.1	ATP-binding cassette (ABC) antibiotic efflux pump;pmr phosphoethanolamine transferase	macrolide antibiotic;peptide antibiotic	antibiotic target alteration;antibiotic efflux
CARD.ARO_3000803	3.1048e-05	0.000466411	0	0	0	0	0.0213162	0.00943174	NP_251183.1	resistance-nodulation-cell division (RND) antibiotic efflux pump	fluoroquinolone antibiotic;diaminopyrimidine antibiotic;phenicol antibiotic	antibiotic efflux
CARD.ARO_3002965	3.02331e-05	0.000370579	0	0	0	0	0.0118543	0.0134402	ABA71730.1	vanW;glycopeptide resistance gene cluster	glycopeptide antibiotic	antibiotic target alteration
CARD.ARO_3000377	2.97708e-05	0.000742407	0	0	0	0	0.0556358	0.00412639	NP_249116.1	resistance-nodulation-cell division (RND) antibiotic efflux pump	macrolide antibiotic;fluoroquinolone antibiotic;monobactam;carbapenem;cephalosporin;cephamycin;penam;tetracycline antibiotic;peptide antibiotic;aminocoumarin antibiotic;diaminopyrimidine antibiotic;sulfonamide antibiotic;phenicol antibiotic;penem	antibiotic efflux
CARD.ARO_3000506	2.87743e-05	0.000443215	0	0	0	0	0.0188496	0.0115539	NP_249115.1	resistance-nodulation-cell division (RND) antibiotic efflux pump	macrolide antibiotic;fluoroquinolone antibiotic;monobactam;carbapenem;cephalosporin;cephamycin;penam;tetracycline antibiotic;peptide antibiotic;aminocoumarin antibiotic;diaminopyrimidine antibiotic;sulfonamide antibiotic;phenicol antibiotic;penem	antibiotic target alteration;antibiotic efflux
CARD.ARO_3003686	2.8752e-05	0.000886894	0	0	0	0	0.0745656	0.00530535	NP_249649.1	Outer Membrane Porin (Opr)	monobactam;carbapenem;cephalosporin;cephamycin;penam;penem	reduced permeability to antibiotic
CARD.ARO_3004074	2.7504e-05	0.000589752	0	0	0	0	0.0266442	0.00389059	NP_251217.1	resistance-nodulation-cell division (RND) antibiotic efflux pump	macrolide antibiotic;monobactam;tetracycline antibiotic;aminocoumarin antibiotic	antibiotic efflux
CARD.ARO_3003573	2.70425e-05	0.000854804	0	0	0	0	0.0374396	0.00117897	AJF82049.1	Acinetobacter mutant Lpx gene conferring resistance to colistin	peptide antibiotic	antibiotic target alteration
CARD.ARO_3004107	2.61469e-05	0.00053747	0	0	0	0	0.0266115	0.00400849	NP_250963.1	ATP-binding cassette (ABC) antibiotic efflux pump;major facilitator superfamily (MFS) antibiotic efflux pump;resistance-nodulation-cell division (RND) antibiotic efflux pump	fluoroquinolone antibiotic;cephalosporin;glycylcycline;penam;tetracycline antibiotic;acridine dye;rifamycin antibiotic;phenicol antibiotic;triclosan	antibiotic target alteration;antibiotic efflux
CARD.ARO_3000807	2.47653e-05	0.00048372	0	0	0	0	0.0178526	0.00448008	NP_252895.1	resistance-nodulation-cell division (RND) antibiotic efflux pump	fluoroquinolone antibiotic;tetracycline antibiotic;acridine dye	antibiotic efflux
CARD.ARO_3002679	2.41022e-05	0.000466041	0	0	0	0	0.0156688	0.00424428	NP_249397.1	chloramphenicol acetyltransferase (CAT)	phenicol antibiotic	antibiotic inactivation
CARD.ARO_3003680	2.37747e-05	0.000484627	0	0	0	0	0.0170213	0.0036548	NP_248847.1	resistance-nodulation-cell division (RND) antibiotic efflux pump	triclosan	antibiotic efflux
CARD.ARO_3003583	2.29453e-05	0.000366195	0	0	0	0	0.0115032	0.00990332	AEX49906.1	pmr phosphoethanolamine transferase	peptide antibiotic	antibiotic target alteration
CARD.ARO_3003031	2.25702e-05	0.000431099	0	0	0	0	0.0197848	0.00483377	AAG07763.1	resistance-nodulation-cell division (RND) antibiotic efflux pump	macrolide antibiotic;fluoroquinolone antibiotic;tetracycline antibiotic;acridine dye;phenicol antibiotic	antibiotic efflux
CARD.ARO_3003692	2.20515e-05	0.000430403	0	0	0	0	0.0223697	0.00542325	NP_252367.1	resistance-nodulation-cell division (RND) antibiotic efflux pump	macrolide antibiotic;tetracycline antibiotic;triclosan	antibiotic efflux
CARD.ARO_3002242	2.17542e-05	0.000730352	0	0	0	0	0.0400879	0.00188635	AAB19430.2	CARB beta-lactamase	penam	antibiotic inactivation
CARD.ARO_3003693	2.17225e-05	0.00035347	0	0	0	0	0.0115709	0.00601273	AAG07064.1	resistance-nodulation-cell division (RND) antibiotic efflux pump	macrolide antibiotic;tetracycline antibiotic;triclosan	antibiotic efflux
CARD.ARO_3000149	2.16596e-05	0.000334725	0	0	0	0	0.0139168	0.00754539	NP_249820.1	fosfomycin thiol transferase	fosfomycin	antibiotic inactivation
CARD.ARO_3000596	2.1548e-05	0.000953151	0	0	0	0	0.0837875	0.00271162	AAG03357.1	Erm 23S ribosomal RNA methyltransferase	macrolide antibiotic;lincosamide antibiotic;streptogramin antibiotic	antibiotic target alteration
CARD.ARO_3002858	2.13669e-05	0.000505955	0	0	0	0	0.0214833	0.00282952	AHW42429.1	trimethoprim resistant dihydrofolate reductase dfr	diaminopyrimidine antibiotic	antibiotic target replacement
CARD.ARO_3000818	2.13461e-05	0.000558309	0	0	0	0	0.0325356	0.00459797	NP_252410.1	resistance-nodulation-cell division (RND) antibiotic efflux pump	macrolide antibiotic;fluoroquinolone antibiotic;monobactam;carbapenem;cephalosporin;cephamycin;penam;tetracycline antibiotic;peptide antibiotic;aminocoumarin antibiotic;diaminopyrimidine antibiotic;sulfonamide antibiotic;phenicol antibiotic;penem	antibiotic efflux
CARD.ARO_3003896	2.12666e-05	0.000351126	0	0	0	0	0.0115325	0.00624853	NP_249871.1	ATP-binding cassette (ABC) antibiotic efflux pump;pmr phosphoethanolamine transferase	macrolide antibiotic;peptide antibiotic	antibiotic target alteration;antibiotic efflux
CARD.ARO_3003699	2.10315e-05	0.000681242	0	0	0	0	0.0559242	0.003419	BAE06008.1	resistance-nodulation-cell division (RND) antibiotic efflux pump	macrolide antibiotic;carbapenem;tetracycline antibiotic;acridine dye;diaminopyrimidine antibiotic;phenicol antibiotic	antibiotic efflux
CARD.ARO_3003709	2.0332e-05	0.000365189	0	0	0	0	0.0207081	0.00613063	NP_250710.1	resistance-nodulation-cell division (RND) antibiotic efflux pump	macrolide antibiotic;fluoroquinolone antibiotic;aminoglycoside antibiotic;carbapenem;cephalosporin;cephamycin;penam;tetracycline antibiotic;acridine dye;phenicol antibiotic	antibiotic efflux
CARD.ARO_3003698	2.01561e-05	0.000449105	0	0	0	0	0.0196247	0.00318321	BAE06007.1	resistance-nodulation-cell division (RND) antibiotic efflux pump	macrolide antibiotic;carbapenem;tetracycline antibiotic;acridine dye;diaminopyrimidine antibiotic;phenicol antibiotic	antibiotic efflux
CARD.ARO_3000814	1.98589e-05	0.000468201	0	0	0	0	0.0370257	0.0073096	NP_251182.1	resistance-nodulation-cell division (RND) antibiotic efflux pump	fluoroquinolone antibiotic;diaminopyrimidine antibiotic;phenicol antibiotic	antibiotic efflux
CARD.ARO_3003681	1.9748e-05	0.000441069	0	0	0	0	0.0188406	0.0035369	NP_248848.1	resistance-nodulation-cell division (RND) antibiotic efflux pump	triclosan	antibiotic efflux
CARD.ARO_3002069	1.97145e-05	0.000432603	0	0	0	0	0.0176808	0.00424428	BAJ17544.1	CMY beta-lactamase	cephamycin	antibiotic inactivation
CARD.ARO_3002863	1.88018e-05	0.000502888	0	0	0	0	0.0259653	0.00400849	AHV80711.1	trimethoprim resistant dihydrofolate reductase dfr	diaminopyrimidine antibiotic	antibiotic target replacement
CARD.ARO_3004089	1.85984e-05	0.00093477	0	0	0	0	0.0765077	0.00212214	EEX02086.1	ANT(3'')	aminoglycoside antibiotic	antibiotic inactivation
CARD.ARO_3000782	1.8483e-05	0.000832521	0	0	0	0	0.0740455	0.00412639	AAX14803.1	resistance-nodulation-cell division (RND) antibiotic efflux pump	macrolide antibiotic;fluoroquinolone antibiotic;lincosamide antibiotic;carbapenem;cephalosporin;tetracycline antibiotic;rifamycin antibiotic;diaminopyrimidine antibiotic;phenicol antibiotic;penem	antibiotic efflux
CARD.ARO_3002836	1.84087e-05	0.000499065	0	0	0	0	0.030094	0.003419	AGI42804.1	lincosamide nucleotidyltransferase (LNU)	lincosamide antibiotic	antibiotic inactivation
CARD.ARO_3002613	1.83055e-05	0.000850109	0	0	0	0	0.0743677	0.00224004	YP_009081591.1	ANT(3'')	aminoglycoside antibiotic	antibiotic inactivation
CARD.ARO_3003679	1.82509e-05	0.000308307	0	0	0	0	0.0119309	0.00848856	NP_248846.1	resistance-nodulation-cell division (RND) antibiotic efflux pump	triclosan	antibiotic efflux
CARD.ARO_3002882	1.78599e-05	0.00037885	0	0	0	0	0.0148796	0.00436218	ABF66027.1	ATP-binding cassette (ABC) antibiotic efflux pump	lincosamide antibiotic	antibiotic efflux
CARD.ARO_3003030	1.76913e-05	0.000376653	0	0	0	0	0.014565	0.0036548	AAG07762.1	resistance-nodulation-cell division (RND) antibiotic efflux pump	macrolide antibiotic;fluoroquinolone antibiotic;tetracycline antibiotic;acridine dye;phenicol antibiotic	antibiotic efflux
CARD.ARO_3002645	1.76411e-05	0.000335772	0	0	0	0	0.0157254	0.00589484	CAA62365.1	APH(3')	aminoglycoside antibiotic	antibiotic inactivation
CARD.ARO_3000802	1.74101e-05	0.000329621	0	0	0	0	0.0136992	0.00448008	AAB41958.1	resistance-nodulation-cell division (RND) antibiotic efflux pump	macrolide antibiotic;fluoroquinolone antibiotic;aminoglycoside antibiotic;cephalosporin;penam;tetracycline antibiotic;aminocoumarin antibiotic;diaminopyrimidine antibiotic;phenicol antibiotic	antibiotic efflux
CARD.ARO_3003700	1.69787e-05	0.000356329	0	0	0	0	0.0138392	0.003419	BAE06009.1	resistance-nodulation-cell division (RND) antibiotic efflux pump	macrolide antibiotic;carbapenem;tetracycline antibiotic;acridine dye;diaminopyrimidine antibiotic;phenicol antibiotic	antibiotic efflux
CARD.ARO_3003022	1.66545e-05	0.000215536	0	0	0	0	0.00741344	0.0107286	ACR57831.1	trimethoprim resistant dihydrofolate reductase dfr	diaminopyrimidine antibiotic	antibiotic target replacement
CARD.ARO_3002507	1.60765e-05	0.000364378	0	0	0	0	0.0156526	0.003419	ACQ82813.1	PDC beta-lactamase	monobactam;carbapenem;cephalosporin	antibiotic inactivation
CARD.ARO_3004460	1.54599e-05	0.000247483	0	0	0	0	0.0151183	0.0155624	AAB23649.1	chloramphenicol acetyltransferase (CAT)	phenicol antibiotic	antibiotic inactivation
CARD.ARO_3003206	1.53918e-05	0.000423015	0	0	0	0	0.0251056	0.00318321	AFU35065.1	ABC-F ATP-binding cassette ribosomal protection protein	lincosamide antibiotic;pleuromutilin antibiotic	antibiotic target protection
CARD.ARO_3000809	1.52312e-05	0.000302337	0	0	0	0	0.0120022	0.0036548	NP_252897.1	resistance-nodulation-cell division (RND) antibiotic efflux pump	fluoroquinolone antibiotic;tetracycline antibiotic;acridine dye	antibiotic efflux
CARD.ARO_3000620	1.52059e-05	0.000551122	0	0	0	0	0.0422054	0.00271162	ALH22601.1	resistance-nodulation-cell division (RND) antibiotic efflux pump	fluoroquinolone antibiotic;tetracycline antibiotic	antibiotic efflux
CARD.ARO_3000823	1.47989e-05	0.000348426	0	0	0	0	0.0180752	0.00424428	AFK13828.1	resistance-nodulation-cell division (RND) antibiotic efflux pump;General Bacterial Porin with reduced permeability to beta-lactams	fluoroquinolone antibiotic;monobactam;carbapenem;cephalosporin;glycylcycline;cephamycin;penam;tetracycline antibiotic;rifamycin antibiotic;phenicol antibiotic;triclosan;penem	antibiotic efflux;reduced permeability to antibiotic
CARD.ARO_3003582	1.45502e-05	0.000330709	0	0	0	0	0.0130504	0.00412639	NP_253464.1	pmr phosphoethanolamine transferase	peptide antibiotic	antibiotic target alteration
CARD.ARO_3003033	1.45127e-05	0.000359097	0	0	0	0	0.0183164	0.00247583	BAA34300.1	resistance-nodulation-cell division (RND) antibiotic efflux pump	macrolide antibiotic;fluoroquinolone antibiotic;aminoglycoside antibiotic;carbapenem;cephalosporin;cephamycin;penam;tetracycline antibiotic;acridine dye;phenicol antibiotic	antibiotic efflux
CARD.ARO_3000808	1.44478e-05	0.000323113	0	0	0	0	0.0138692	0.003419	NP_252896.1	resistance-nodulation-cell division (RND) antibiotic efflux pump	fluoroquinolone antibiotic;tetracycline antibiotic;acridine dye	antibiotic efflux
CARD.ARO_3004077	1.43552e-05	0.00030544	0	0	0	0	0.0105461	0.00330111	NP_250052.1	multidrug and toxic compound extrusion (MATE) transporter	N/A	antibiotic efflux
CARD.ARO_3000800	1.36034e-05	0.00030391	0	0	0	0	0.0189676	0.00400849	AAB41956.1	resistance-nodulation-cell division (RND) antibiotic efflux pump	macrolide antibiotic;fluoroquinolone antibiotic;aminoglycoside antibiotic;cephalosporin;penam;tetracycline antibiotic;aminocoumarin antibiotic;diaminopyrimidine antibiotic;phenicol antibiotic	antibiotic efflux
CARD.ARO_3004075	1.35737e-05	0.000252005	0	0	0	0	0.0107234	0.00448008	NP_251216.1	resistance-nodulation-cell division (RND) antibiotic efflux pump	macrolide antibiotic;monobactam;tetracycline antibiotic;aminocoumarin antibiotic	antibiotic efflux
CARD.ARO_3002985	1.29365e-05	0.00028332	0	0	0	0	0.0106099	0.00330111	NP_252244	pmr phosphoethanolamine transferase	peptide antibiotic	antibiotic target alteration
CARD.ARO_3002860	1.28408e-05	0.000207061	0	0	0	0	0.00725836	0.00565904	ABG91835.1	trimethoprim resistant dihydrofolate reductase dfr	diaminopyrimidine antibiotic	antibiotic target replacement
CARD.ARO_3003801	1.28402e-05	0.000264751	0	0	0	0	0.0102876	0.00412639	ALV80601.1	major facilitator superfamily (MFS) antibiotic efflux pump	bicyclomycin	antibiotic efflux
CARD.ARO_3000801	1.27169e-05	0.00032603	0	0	0	0	0.0137373	0.00247583	AAB41957.1	resistance-nodulation-cell division (RND) antibiotic efflux pump	macrolide antibiotic;fluoroquinolone antibiotic;aminoglycoside antibiotic;cephalosporin;penam;tetracycline antibiotic;aminocoumarin antibiotic;diaminopyrimidine antibiotic;phenicol antibiotic	antibiotic efflux
CARD.ARO_3003574	1.25597e-05	0.000487019	0	0	0	0	0.0295384	0.00165055	AJF83452.1	Acinetobacter mutant Lpx gene conferring resistance to colistin	peptide antibiotic	antibiotic target alteration
CARD.ARO_3000186	1.25088e-05	0.000399406	0	0	0	0	0.0311265	0.00459797	CAJ67339.1	tetracycline-resistant ribosomal protection protein	tetracycline antibiotic	antibiotic target protection
CARD.ARO_3003705	1.24865e-05	0.000277743	0	0	0	0	0.0126252	0.00330111	BAE06006.1	resistance-nodulation-cell division (RND) antibiotic efflux pump	phenicol antibiotic	antibiotic efflux
CARD.ARO_3002528	1.24148e-05	0.000182255	0	0	0	0	0.00626101	0.00754539	AAG15269.1	AAC(3)	aminoglycoside antibiotic	antibiotic inactivation
CARD.ARO_3000593	1.22581e-05	0.000210774	0	0	0	0	0.0106321	0.0112002	AAC36915.1	Erm 23S ribosomal RNA methyltransferase	macrolide antibiotic;lincosamide antibiotic;streptogramin antibiotic	antibiotic target alteration
CARD.ARO_3000595	1.18728e-05	0.000227087	0	0	0	0	0.0118245	0.00542325	AAA98096.1	Erm 23S ribosomal RNA methyltransferase	macrolide antibiotic;lincosamide antibiotic;streptogramin antibiotic	antibiotic target alteration
CARD.ARO_3001654	1.17164e-05	0.000345048	0	0	0	0	0.0258359	0.0037727	ACX70402.1	OXA beta-lactamase	cephalosporin;penam	antibiotic inactivation
CARD.ARO_3004073	1.16725e-05	0.000240775	0	0	0	0	0.00951773	0.00412639	NP_251218.1	resistance-nodulation-cell division (RND) antibiotic efflux pump	macrolide antibiotic;monobactam;tetracycline antibiotic;aminocoumarin antibiotic	antibiotic efflux
CARD.ARO_3003295	1.06521e-05	0.00021535	0	0	0	0	0.010216	0.0037727	CCP42728.1	fluoroquinolone resistant gyrA	fluoroquinolone antibiotic;nybomycin	antibiotic target alteration
CARD.ARO_3003682	1.04554e-05	0.000269494	0	0	0	0	0.0128787	0.00235793	NP_253661.1	resistance-nodulation-cell division (RND) antibiotic efflux pump	triclosan	antibiotic efflux
CARD.ARO_3002934	1.03252e-05	0.000648925	0	0	0	0	0.0595034	0.00601273	ACM47284	vanS;glycopeptide resistance gene cluster	glycopeptide antibiotic	antibiotic target alteration
CARD.ARO_3000413	1.01041e-05	0.000233354	0	0	0	0	0.0111187	0.00483377	ACJ63260.1	sulfonamide resistant sul	sulfonamide antibiotic;sulfone antibiotic	antibiotic target replacement
CARD.ARO_3000768	9.90343e-06	0.000372542	0	0	0	0	0.0273764	0.00153266	ACJ59254.1	small multidrug resistance (SMR) antibiotic efflux pump	macrolide antibiotic;aminocoumarin antibiotic	antibiotic efflux
CARD.ARO_3002685	9.06602e-06	0.00033606	0	0	0	0	0.0183314	0.00117897	CAA30695.1	chloramphenicol acetyltransferase (CAT)	phenicol antibiotic	antibiotic inactivation
CARD.ARO_3003704	8.71357e-06	0.000178367	0	0	0	0	0.00828319	0.00506956	BAE06005.1	resistance-nodulation-cell division (RND) antibiotic efflux pump	phenicol antibiotic	antibiotic efflux
CARD.ARO_3000826	8.6008e-06	0.000214332	0	0	0	0	0.0123047	0.00306531	NP_460903.1	resistance-nodulation-cell division (RND) antibiotic efflux pump	fluoroquinolone antibiotic;cephalosporin;glycylcycline;penam;tetracycline antibiotic;rifamycin antibiotic;phenicol antibiotic;triclosan	antibiotic efflux
CARD.ARO_3000250	8.56285e-06	0.000314841	0	0	0	0	0.017969	0.00153266	AAA98296.1	Erm 23S ribosomal RNA methyltransferase	macrolide antibiotic;lincosamide antibiotic;streptogramin antibiotic	antibiotic target alteration
CARD.ARO_3004072	8.0406e-06	0.000196456	0	0	0	0	0.00889025	0.00247583	NP_251215.1	resistance-nodulation-cell division (RND) antibiotic efflux pump	macrolide antibiotic;monobactam;tetracycline antibiotic;aminocoumarin antibiotic	antibiotic efflux
CARD.ARO_3002665	7.67821e-06	0.000157775	0	0	0	0	0.00905211	0.0073096	BAF80809.1	16S rRNA methyltransferase (A1408)	aminoglycoside antibiotic	antibiotic target alteration
CARD.ARO_3002533	7.67754e-06	0.000195634	0	0	0	0	0.00856862	0.00224004	CAA31895.1	AAC(3)	aminoglycoside antibiotic	antibiotic inactivation
CARD.ARO_3002956	7.44471e-06	0.000150522	0	0	0	0	0.00861961	0.00778118	AAB05624.1	vanY;glycopeptide resistance gene cluster	glycopeptide antibiotic	antibiotic target alteration
CARD.ARO_3003818	7.40278e-06	0.000219195	0	0	0	0	0.011602	0.00165055	ALJ89624.1	fluoroquinolone resistant parC	fluoroquinolone antibiotic	antibiotic target alteration
CARD.ARO_3002923	7.30858e-06	0.000253582	0	0	0	0	0.0190355	0.00188635	AAM09851.1	glycopeptide resistance gene cluster;vanR	glycopeptide antibiotic	antibiotic target alteration
CARD.ARO_3003817	6.83094e-06	0.000295892	0	0	0	0	0.0190894	0.00129686	AJF82744.1	fluoroquinolone resistant gyrA	fluoroquinolone antibiotic;nybomycin	antibiotic target alteration
CARD.ARO_3000781	6.75115e-06	0.000280988	0	0	0	0	0.0171487	0.00153266	AAX14802.1	resistance-nodulation-cell division (RND) antibiotic efflux pump	macrolide antibiotic;fluoroquinolone antibiotic;lincosamide antibiotic;carbapenem;cephalosporin;tetracycline antibiotic;rifamycin antibiotic;diaminopyrimidine antibiotic;phenicol antibiotic;penem	antibiotic efflux
CARD.ARO_3003078	6.73113e-06	0.000310453	0	0	0	0	0.0207806	0.00106107	AFK58562.1	daptomycin resistant liaR	peptide antibiotic	antibiotic target alteration
CARD.ARO_3002835	6.72094e-06	0.000185824	0	0	0	0	0.0101496	0.00188635	CAL44992.1	lincosamide nucleotidyltransferase (LNU)	lincosamide antibiotic	antibiotic inactivation
CARD.ARO_3000780	6.66182e-06	0.000234288	0	0	0	0	0.0126114	0.00117897	YP_002320475.1	resistance-nodulation-cell division (RND) antibiotic efflux pump	macrolide antibiotic;fluoroquinolone antibiotic;lincosamide antibiotic;carbapenem;cephalosporin;tetracycline antibiotic;rifamycin antibiotic;diaminopyrimidine antibiotic;phenicol antibiotic;penem	antibiotic efflux
CARD.ARO_3002848	6.6423e-06	0.000276244	0	0	0	0	0.0196535	0.00129686	ACD56151.1	rifampin ADP-ribosyltransferase (Arr)	rifamycin antibiotic	antibiotic inactivation
CARD.ARO_3002881	6.53467e-06	0.000250335	0	0	0	0	0.0172194	0.00106107	ABF66011.1	ABC-F ATP-binding cassette ribosomal protection protein	lincosamide antibiotic	antibiotic target protection
CARD.ARO_3003808	6.53368e-06	0.00022593	0	0	0	0	0.0148414	0.00141476	AKL79742.1	CarO porin	carbapenem	reduced permeability to antibiotic;resistance by absence
CARD.ARO_3004468	6.47198e-06	0.000138086	0	0	0	0	0.00678903	0.0035369	YP_004928104.1	ciprofloxacin phosphotransferase	fluoroquinolone antibiotic	antibiotic inactivation
CARD.ARO_3003389	6.38076e-06	0.000144842	0	0	0	0	0.00702935	0.00306531	CAC29732.1	dapsone resistant dihydropteroate synthase folP	sulfonamide antibiotic;sulfone antibiotic	antibiotic target alteration
CARD.ARO_3000195	6.01563e-06	0.000182306	0	0	0	0	0.0124829	0.00282952	AAA20117.1	tetracycline-resistant ribosomal protection protein	tetracycline antibiotic	antibiotic target protection
CARD.ARO_3002795	5.96472e-06	0.0001637	0	0	0	0	0.00991662	0.00259373	AEG74318.1	quinolone resistance protein (qnr)	fluoroquinolone antibiotic	antibiotic target protection
CARD.ARO_3002695	5.94135e-06	0.000143323	0	0	0	0	0.00522074	0.00259373	AAM77075.1	major facilitator superfamily (MFS) antibiotic efflux pump	phenicol antibiotic	antibiotic efflux
CARD.ARO_3000180	5.88916e-06	0.000251598	0	0	0	0	0.0173134	0.00176845	AAA20116.1	major facilitator superfamily (MFS) antibiotic efflux pump	tetracycline antibiotic	antibiotic efflux
CARD.ARO_3002968	5.86419e-06	0.000270245	0	0	0	0	0.0222134	0.00188635	ABX54688.1	glycopeptide resistance gene cluster;vanXY	glycopeptide antibiotic	antibiotic target alteration
CARD.ARO_3001677	5.5249e-06	0.000255204	0	0	0	0	0.0210191	0.00106107	AFH36332.1	OXA beta-lactamase	cephalosporin;penam	antibiotic inactivation
CARD.ARO_3003907	5.34229e-06	0.00021902	0	0	0	0	0.0139182	0.00141476	WP_015735625.1	Cfr 23S ribosomal RNA methyltransferase	macrolide antibiotic;lincosamide antibiotic;streptogramin antibiotic;oxazolidinone antibiotic;phenicol antibiotic;pleuromutilin antibiotic	antibiotic target alteration
CARD.ARO_3002804	5.21331e-06	0.000259867	0	0	0	0	0.0222225	0.00106107	ACC85616.1	fosfomycin thiol transferase	fosfomycin	antibiotic inactivation
CARD.ARO_3002667	4.98913e-06	0.000141904	0	0	0	0	0.00711879	0.00153266	ABY64751.1	16S rRNA methyltransferase (G1405)	aminoglycoside antibiotic	antibiotic target alteration
CARD.ARO_3004035	4.82595e-06	7.18267e-05	0	0	0	0	0.00351421	0.0103749	ANZ79240.1	ATP-binding cassette (ABC) antibiotic efflux pump	tetracycline antibiotic	antibiotic efflux
CARD.ARO_3003930	4.72981e-06	0.000129632	0	0	0	0	0.00770603	0.00235793	YP_208874.1	tetracycline-resistant ribosomal protection protein	tetracycline antibiotic	antibiotic target protection
CARD.ARO_3003311	4.3792e-06	0.000193449	0	0	0	0	0.0151174	0.00129686	AAK74984.1	fluoroquinolone resistant parC;fluoroquinolone self resistant parC	fluoroquinolone antibiotic	antibiotic target alteration
CARD.ARO_3000753	4.20551e-06	0.000165677	0	0	0	0	0.0118914	0.00129686	BAD89844.2	multidrug and toxic compound extrusion (MATE) transporter	fluoroquinolone antibiotic;acridine dye;triclosan	antibiotic efflux
CARD.ARO_3000858	4.06355e-06	0.000188349	0	0	0	0	0.0159445	0.00212214	ADC55560.1	16S rRNA methyltransferase (G1405)	aminoglycoside antibiotic	antibiotic target alteration
CARD.ARO_3003109	3.93482e-06	0.000164999	0	0	0	0	0.0114115	0.00188635	YP_724476.1	ABC-F ATP-binding cassette ribosomal protection protein	macrolide antibiotic;streptogramin antibiotic	antibiotic target protection
CARD.ARO_3003070	3.74607e-06	0.000124827	0	0	0	0	0.00582236	0.00117897	AAM09852.1	vanX;glycopeptide resistance gene cluster	glycopeptide antibiotic	antibiotic target alteration
CARD.ARO_3003379	3.72041e-06	0.00012513	0	0	0	0	0.00731703	0.00129686	ACH50230.1	resistance-nodulation-cell division (RND) antibiotic efflux pump	fluoroquinolone antibiotic;cephalosporin;glycylcycline;penam;tetracycline antibiotic;rifamycin antibiotic;phenicol antibiotic;triclosan	antibiotic target alteration;antibiotic efflux
CARD.ARO_3000005	3.46196e-06	0.000119613	0	0	0	0	0.00714246	0.00153266	AAM09849.1	glycopeptide resistance gene cluster;van ligase	glycopeptide antibiotic	antibiotic target alteration
CARD.ARO_3002957	3.27323e-06	7.29608e-05	0	0	0	0	0.0044719	0.0036548	AAM09853.1	vanY;glycopeptide resistance gene cluster	glycopeptide antibiotic	antibiotic target alteration
CARD.ARO_3000621	3.16594e-06	6.43767e-05	0	0	0	0	0.00229415	0.00400849	ABX30738.1	blaZ beta-lactamase	penam	antibiotic inactivation
CARD.ARO_3000205	3.09e-06	9.19284e-05	0	0	0	0	0.0051746	0.00165055	AAA27471.1	tetracycline inactivation enzyme	glycylcycline;tetracycline antibiotic	antibiotic inactivation
CARD.ARO_3000774	2.81232e-06	9.6636e-05	0	0	0	0	0.00560033	0.00129686	AAL14439.1	resistance-nodulation-cell division (RND) antibiotic efflux pump	glycylcycline;tetracycline antibiotic	antibiotic efflux
CARD.ARO_3004128	2.42087e-06	9.13103e-05	0	0	0	0	0.00436281	0.00106107	AIA49384.1	General Bacterial Porin with reduced permeability to beta-lactams	fluoroquinolone antibiotic;monobactam;carbapenem;cephalosporin;cephamycin;penam;tetracycline antibiotic;phenicol antibiotic;penem	reduced permeability to antibiotic;resistance by absence
CARD.ARO_3002944	2.41662e-06	9.29521e-05	0	0	0	0	0.00631898	0.00117897	AAM09850.1	vanH;glycopeptide resistance gene cluster	glycopeptide antibiotic	antibiotic target alteration
CARD.ARO_3000025	2.31944e-06	8.16561e-05	0	0	0	0	0.00450638	0.00106107	NP_358969.1	ATP-binding cassette (ABC) antibiotic efflux pump	fluoroquinolone antibiotic	antibiotic efflux
CARD.ARO_3004036	1.56861e-06	2.7797e-05	0	0	0	0	0.00135085	0.00554115	ANZ79241.1	ATP-binding cassette (ABC) antibiotic efflux pump	tetracycline antibiotic	antibiotic efflux
CARD.ARO_3000215	5.48796e-07	1.79368e-05	0	0	0	0	0.00108399	0.00141476	YP_001245420.1	methicillin resistant PBP2	monobactam;carbapenem;cephalosporin;cephamycin;penam	antibiotic target replacement
CARD.ARO_3003773	5.34563e-07	2.38593e-05	0	0	0	0	0.00151841	0.00165055	ABG86067.1	defensin resistant mprF	peptide antibiotic	antibiotic target alteration
CARD.ARO_3002654	4.97942e-07	1.7506e-05	0	0	0	0	0.001067	0.00117897	AAA76822.1	APH(3')	aminoglycoside antibiotic	antibiotic inactivation

## Sheet: S1D
Supplementary Table: Summary statistics of microbiome data (virulence factors)
Virulence factor	Mean.Ab	SD.Ab	Min.Ab	Q1.Ab	Median.Ab	Q3.Ab	Max.Ab	Prevalence	VF_Name	VF_Description	VF_Function	VF_Mechanism	VF_Keywords
VF0114	0.134104	0.258483	0	0	0	0.10273	1	0.407622	Flagella	NA	Penetrating the mucus barrier; chemotaxis is also important for intestinal colonization;In the absence of a type III secretion system, the flagellar secretion apparatus appears to secrete several putative virulence proteins including FspA, FlaC and up to eight Cia proteins	NA	Motility; Chemotaxis; Invasion; Phase variation
VF0333	0.118562	0.158023	0	0	0.0405009	0.202771	1	0.608542	T2SS	Type II secretion system	Still unknown.	NA	Secretion system; Type II secretion system
VF0394	0.0933997	0.16645	0	0	0.0152264	0.105187	1	0.621402	Flagella	NA	Required for efficient cellular invasion.; YplA, a phospholipase is secreted by this type III flagellum secretion system. YplA is required for survival of Y. enterocolitica in the Peyer's patches and for stimulation of the acute inflammatory response of the host to the infection.	NA	Secretion system; Invasion; Motility
VF0136	0.0623944	0.0985067	0	0	0.0102189	0.0976364	1	0.571968	Yersiniabactin	NA	FyuA/Psn-Irp system uses yersiniabactin, a siderophore that can remove iron from a number of mammalian proteins, due to its extremely high affinity for ferric iron	YbtA is an AraC-like regulator required for transcription of fyuA/psn, irp2 and ybtP, also downregulate its own transcription; In the presence of iron, Fur, a cytosolic protein that on binding ferrous iron changes conformation and binds DNA at a specific site called a Fur box, thus preventing transcription, downregulates transcription of fyuA/psn, irp2 and other iron-regulated genes	Iron uptake; Siderophore
VF0323	0.0513743	0.151589	0	0	0	0	0.998924	0.207999	Capsule	NA	Play an important role in bacterial survival and persistance in the enviroment and evasion of host immune response; the presence of heptose residues in the capsule may be important for virulence. Heptose residues found in some cell surface-located glycoconjugates are required for adhesion	NA	Adherence; Phase variation
VF0224	0.0498912	0.150269	0	0	0	0.00953975	1	0.315597	F1C fimbriae	NA	Adhesin	Binds of to the GalNAc<beta>1-4Gal<beta> sequence of glycolipids, i.e., asialo-GM1 and asialo-GM2 with high affinity; An additional binding to carbohydrate structures GlcNAc<beta>1-3Gal<beta>, Gal<beta>1-4Glc, Gal, and Glc of glycolipids may indicate functional low-affinity receptor sites	Adherence
VF0140	0.0491944	0.11333	0	0	0	0.0422006	1	0.441718	TTSS	Type III secretion system	Deliver Yop effectors into the cytosol of host cells to disturb the dynamics of the cytoskeleton and block phagocytosis by macrophages and PMNs, also impair the production of pro-inflammatory cytokines, chemokines. These actions allow the survival of the invading Yersinia and their extracellular multiplication in lymphoid tissues	NA	Secretion system; Type III secretion system
VF0118	0.0384349	0.108206	0	0	0	0.02512	1	0.438296	TTSS	Type III secretion system	Mxi-Spa system secretes approximately 2NA proteins with the four Ipas A, B,C,D and IpgD being the most abundant; Recent findings indicate that TTSS in Shigella is responsible not only for protein secretion, but that it is also involved in the control mechanisms of transcription of other target genes located on the virulence plasmid, virA and ipaH9.8, these proteins were not constitutively synthes…	NA	Secretion system; Type III secretion system; Invasion
VF0404	0.0365271	0.0807448	0	0	0	0.0485999	1	0.433813	ECP	E. coli common pilus	ECP, composed of a 21-kDa pilin subunit EspA, is a pilus-adherence factor that is crucial to the virulence of E. coli O157 in humans, and is also carried by commensal strains of E. coli.; It is suggested that pathogenic E. coli strains may use ECP to mimic commensal E. coli and provide themselves with an ecological advantage for host colonization and evasion of the immune system.	NA	Adherence
VF0221	0.0341871	0.0607452	0	0	0	0.0534625	0.807016	0.428976	Type 1 fimbriae	NA	Makes a important contribution to colonization of the bladder	FimH is the adhesin protein binding to mannose-containing glycoprotein receptors, known as uroplakins, that are located on the luminal surface of the bladder epithelial cells. This binding is followed by invasion of uroepithelia cells	Adherence; Invasion
VF0256	0.0300621	0.0568965	0	0	0	0.0412562	0.878465	0.386503	Shu	NA	Shu heme utilization locus includes:; ShuA, TonB-denpendent heme receptor which is critical for the uptake of heme into the periplasm,; ShuT, putative periplasmic binding protein which specifically binds heme and acts as a soluble receptor for active uptake of heme into the cytoplasm; ShuU and ShuV comprise the cytoplasmic membrane permease and ATPase; ShuS, soluble cytoplasmic protein may functi…	NA	Iron uptake; Heme uptake
VF0015	0.0196698	0.088424	0	0	0	0	0.962034	0.115975	Isd	NA	NA	Surface exposed protein glyceraldehyde-3-phosphate dehydrogenase (GAPDH), an enzyme usually associated with glycolysis, is a transferrin receptor involved in stripping iron off transferrin; isd genes (iron-regulated surface determinant) encode factors for hemoglobin binding and passagen of heme-iron to the cytoplasm: ; hemoglobin binds on IsdB. Heme is removed from hemoglobin (IsdA and IsdB) and …	Iron uptake; Heme uptake
VF0367	0.0195584	0.0836091	0	0	0	0	1	0.130368	LPS	Lipopolysaccharide	Plays a role in entry and early survival inside macrophages;Resistance to innate-immunity anti-bacterial responses;a modulator of the immune response	The entry and early survival stages of smooth Brucella are lipid-raft-dependent. The entry-gateway seems to include Brucella surface-exposed HSP6NA-PrPc (cellular prion protein) interaction but also a SR-A (class A scavenger)-lipid-A interaction and is also dependent on the LPS O-chain. And the LPS O-chain ensures the Brucella containing vacuole (BCV) aviodance of fusion with lysosomes transientl…	Intracellular survival; Intracellular entry; Immuno-modulatory activity
VF0091	0.0185759	0.0631258	0	0	0	0	1	0.244455	Alginate	Mucoid exopolysaccharide	Allows the bacteria form biofilm; contributes to the persistence of the bacteria in the CF lung: act as an adhesin, preventing the bacteria from being expelled from the lung, and alginate slime layer makes it more difficult for phagocytes to ingest and kill the bacteria	NA	Antiphagocytosis; Serum resistance
VF0228	0.0184523	0.0337746	0	0	0	0.0279556	0.493577	0.439948	Enterobactin	NA	Iron uptake: the siderophore enterobactin imported through the FepA receptor and the FepBCDG system	NA	Iron uptake; Siderophore
VF0082	0.0167138	0.0564621	0	0	0	0.00214255	1	0.307574	Type IV pili	NA	Attaches to host cells, but not to mucin, causing a twitching motility that allows the bacteria to move along the cell surface; biofilm formation	The C-terminal receptor-binding domain of pilin binds to asialoGM1 gangliosies on host cells. Generally, GM1 gangliosides contain a sialic acid moiety. P.aeruginosa produces a neuraminidase which removes sialic acid residues from the GM1 to form the asialoGM1, which is a better receptor for the pili; The asialoGM1 is present in increased abundance on the surface of cystic fibrosis respiratory epi…	Adherence; Twitching motility
VF0220	0.0159752	0.0510139	0	0	0	0	0.753503	0.177324	P fimbriae	NA	PapG mediates binding to the <alpha>-D-galactopyranosyl-(1-4)-<beta>-D-galactopyranoside (Gal<alpha>(1,4)Gal) moiety present in a globoseries of glycolipids found on host cells lining the upper urinary tract and erythrocytes; three adhesin variants of PapG-G-I, G-II, G-III recognize three different but related Gal<alpha>(1,4)Gal receptors; PapG-mediated interactions with its Gal<alpha>(1,4)Gal-co…	NA	Adherence
VF0299	0.0149841	0.0533162	0	0	0	0.00521149	1	0.367036	Mycobactin	NA	Cell-association mycobactin participates in iron internalization and/or to serve as a temporary iron-holding molecule to prevent sudden influx of excess iron if the metal suddenly becomes available after a period of iron limitation	NA	Iron uptake; Siderophore
VF0222	0.0103484	0.0383175	0	0	0	0	1	0.156088	S fimbriae	NA	S fimbriae binds to receptors containing sialic acid sugar moieties, the sialic acid residues are presented on UP3, one of four integral membrane uroplakin proteins	NA	Adherence
VF0018	0.00944388	0.0449775	0	0	0	0	1	0.130722	PVL	Panton-Valentine leukocidin	Induce cell activation linked to a Ca2+ influx, and pore formation as two consecutive and independently inhibitable events	NA	Toxin; Membrane-damaging; Pore-forming; Channel-forming involving beta-sheet-containing toxin (beta-barrel); Biocomponent leukocidin
VF0101	0.00921585	0.054842	0	0	0	0	1	0.109132	Vi antigen	NA	Prevent antibody-mediated opsonization, increase resistance to host peroxide and resistance to complement activation by the alternate pathway and complement-mediated lysis	NA	Immune evasion
VF0083	0.00916639	0.0425552	0	0	0	0	0.748354	0.0965078	TTSS	Type III secretion system	Transports four known effector proteins: ExoS, ExoT, ExoU and ExoY, although most strains generally do not express all four at the same time	NA	Secretion system; Type III secretion system
VF0300	0.00903263	0.0455017	0	0	0	0	0.700077	0.10689	IdeR	Iron-dependent regulator	Repressor of iron acquisition genes, activator of iron storage genes and a posistive regulator of oxidative stress responses	NA	Regulation
VF0430	0.00893925	0.0430711	0	0	0	0	0.931642	0.170835	Flagella	NA	Polar flagella required for motility and macrophage invasion	NA	Invasion
VF0227	0.00775186	0.0203663	0	0	0	0	0.345408	0.245635	Chu	E. coli hemin uptake	Iron uptake: the ability to use heme and/or hemoglobin might be especially advantageous to pathogenic bacteria. These pathogens often secrete cytotoxins, which gain access to the intracellular heme reservoir besides initiating tissue invasion. Cytotoxin production coupled with the capability to utilize heme and/or hemoglobin could serve as an effective iron acquisition strategy during the progres…	NA	Iron uptake; Heme uptake
VF0157	0.0072046	0.0467225	0	0	0	0	1	0.0823502	Flagella	NA	Not required for intracellular growth but enhance the invasion capacity	NA	Motility
VF0273	0.00646608	0.0293409	0	0	0	0	1	0.134379	Flagella	NA	Swimming motility; play a role in biofilm formation and other pathogenic adaptations	NA	Adherence; Motility
VF0307	0.00501639	0.0365262	0	0	0	0	1	0.077395	LipF	NA	Annotated as a lipase/esterase, dramatically upregulated at low pH, a possible function of lipF could be to hydrolyze toxic fatty acids present in caseous necrotic debris during tuberculosis or it may modify the external cell wall as an adaptive response to acid damage	NA	Metabolic adaptation
VF0156	0.00469666	0.0317296	0	0	0	8.91363e-05	1	0.254483	Dot/Icm	Defect in organella trafficking/intracellular multiplication	Allows survival and growth in macrophages, prevent phagosome acifidication and lysosome fusion, essential for induction of apoptosis in human macrophages	Assemble and activate a type IV secretion system in the bacterial membrane that exports plasmid and virulence factors to inhibit the phago-lysosome fusion and reprogram the Legionella-bearing vacuole; IcmS was shown to bind members of the SidE family (SidE, SdeA, SdeB, SdeC) and to be required for the export of SdeA; IcmW interacted with and was required for the translocation of additional Dot/Ic…	Secretion system; Type IV secretion system
VF0436	0.00445304	0.0330264	0	0	0	0	0.899465	0.0683105	Capsule I	Type I O-polysaccharide	A key virulence determinant and that loss of capsule production results in severe attenuation in animal models of disease	Plays a role in reducing B. pseudomallei phagocytosis by host cells by preventing complement factor C3b deposition on the surface of the bacterium	Antiphagocytosis
VF0103	0.00435706	0.0254601	0	0	0	0	0.72921	0.132964	Agf	Thin aggregative fimbriae (or curli)	Aids in attachment to the villi of enterocytes, also cause the bacteria to become attached to each other	NA	Adherence; Fimbrial
VF0035	0.00424118	0.0316914	0	0	0	0	1	0.0522652	TTSS	Type III secretion system	The B. bronchiseptica TTSS modulates the host immune response, contributes to persistent colonization of the trachea	BopB, BopN, BopD, Bsp22 and BopC/BteA have been identified as type III secreted proteins; BopB and BopD are orthologues of the Yersinia YopB and YopD translocation proteins. BopB and BopD complex is responsible for the pore formation in the host plasma membrane that functions as the conduit for the transition of effector proteins into host cells; BopN is orthologous to YopN, which functions as a …	Secretion system; Type III secretion system
VF0229	0.00420966	0.0167326	0	0	0	0	0.797819	0.163874	Aerobactin	NA	Iron uptake	NA	Iron uptake; Siderophore
VF0216	0.00410817	0.0359899	0	0	0	0	0.856604	0.0260736	EAST1	EAEC heat-stable enterotoxin 1	Activates guanylate cyclase resulting in ion secretion	NA	Toxin; Membrane-acting; Guanylate cyclase
VF0334	0.00369443	0.0197074	0	0	0	0	0.491236	0.0837659	HSI-I	Hcp1 secretion island I	Play role in chronic P. aeruginosa infections	Encoding a protein secretion apparatus for exporting Hcp1, a hexameric protein that forms rings with 4NA angstrom internal diameter; a ClpB-like AAA+ family protein, ClpV1, forms a core component of this secretion apparatus and is likely to provide the energy for translocation of Hcp1	Secretion system; Type VI secretion system
VF0033	0.00353124	0.0320512	0	0	0	0	0.904941	0.0395234	LPS	NA	Prevents clearance of the organism by host surfactant protein; confers protection to the bacterium from complement-mediated cell lysis	NA	Endotoxin
VF0236	0.00331091	0.0267277	0	0	0	0	0.895137	0.166116	OmpA	Outer membrane protein A	Contributes to brain mecrovascular endothelial cells (BMECs) invasion via a ligand-receptor interaction. Interaction of OmpA with its receptor induces actin condensation at the binding site. The actin reorganization induced by E. coli depends on activation of several host proteins involved in signaling, including focal adhesion kinase, PI3-kinase, PKC-<alpha>, and caveolin-1; OmpA also binds to C…	Binds to a 95-kDa HBMEC receptor, Ecgp, for E. coli invasion. OmpA-Ecgp interaction occurs via GlcNAc1,4-GlcNAc epitopes as well as the protein backbone of the receptor. The presence of Ecgp on human brain microvascular endothelial cell, but not on nonbrain endothelial cells. Ecgp is a gp96 (a cell surface glycoprotein related to heat shock proteins) homologue.	Invasion; Serum resistance
VF0044	0.00307896	0.0233892	0	0	0	0	1	0.0579283	LOS	NA	Major immunogen; LOS phosphorylcholine (ChoP) may influence invasion via interaction with PAF receptor and stimulates of inflammotory signals; LPS phase variation is characterized by the spontaneous loss and gain of oligosaccharide structures present in the outer core. the phase variable expression of LPS biosynthesis genes promotes evasion of antigen-specific host immune defences and allow colon…	Lic1(lic1A-lic1D) responsible for the addition of phosphorylcholine to LPS. lic1A mediates phase variation (tetranucleotide repeat region); phase-variable gene lic3A encodes an <alpha>-2,3-sialyltransferase that is responsible for the addition of Neu5Ac to terminal lactose in the LPS, LPS sialylation has been shown to be important for resistance to the killing effectors of normal human serum	Endotoxin
VF0223	0.00272113	0.020251	0	0	0	0	0.531232	0.0404672	Dr adhesins	NA	Facilitates colonization	The Dr adhesins bind to the Dr blood group antigen (Dra) present on decay accelerating factor (DAF) of erythrocytes and other cell types. DAF is a membrane protein that prevents cell lysis by complement; inducing a cytopathic effect characterized by the development of long cellular extensions that wrap around the adherent bacteria. (All members of the Dr family including UPEC elicit this effect);…	Adherence
VF0095	0.00261435	0.0152687	0	0	0	0	0.358904	0.0686645	Pyochelin	NA	Effective at promoting iron uptake in P. aeruginosa; catalyzes the formation of tissue-damaging free radicals; pyochelin also binds other transition metals (e.g. Mo(IV), Co(II)) with appreciable affinity and is implicated in the delivery of both Co(II) and Mo(IV) to P. aeruginosa cells	Pyochelin is a structurally unique siderophore possessing phenolate, but neither a hydroxamate nor a catecholate moiety. Pyochelin binds Fe (III) in a 2:1 stoichiometry with comparatively low affinity (stability constant, 1NA**5); FptA is the specific receptor for Fe(III)-pyochelin	Iron uptake; Siderophore
VF0084	0.00256995	0.0206188	0	0	0	0	1	0.0508495	xcp secretion system	NA	Secretes toxins and enzymes into the extracellular fluid; need for proper localization of PilB and PilC	NA	Secretion system; Type II secretion system
VF0050	0.00220915	0.0207121	0	0	0	0	0.754074	0.0325625	Urease	NA	An important colonization factor, contributes to acid resistance, epithelial cell damage, chemotactic behaviour, and nitrogen metabolism	A Ni2+-containing enzyme, catalyzes the hydrolysis of urea to ammonium and carbon dioxide. Urea channels (UreI) present in the inner membrane are opened at pH<6.5, allowing delivery of urea to urease. The ammonia produced diffuses into, and thus buffers the periplasm.	Enzyme; Acid resistance; Colonization
VF0308	0.00207719	0.0218697	0	0	0	0	0.808088	0.029613	FadD33	NA	The actual function of the FadD33 in pathogenesis is unclear	NA	Metabolic adaptation
VF0089	0.00203961	0.0109842	0	0	0	0	0.336159	0.113143	Rhamnolipid	NA	The rhamnolipid solubilizes the surfactant, making it easier for the Plc to degrade the surfactant, thus may cause alveolar collapse	NA	Biosurfactant
VF0123	0.00203722	0.00831816	0	0	0	0	0.333903	0.142402	Aerobactin	NA	Iron uptake, critical for intracellular growth	Aerobactin biosynthesis is driven by enzymes encoded by the iucABCD genes. IutA is the outer membrane receptor required for ferri-aerobactin uptake.	Iron uptake; Siderophore
VF0239	0.00187273	0.0110619	0	0	0	0	0.374967	0.100991	K1 capsule	NA	Confers invasiveness, modulates trafficking of E. coli-containing vacuoles and enhances intracellular bacterial survival in brain microvascular endothelial cells (BMECs)	NA	Invasion; Antiphagocytosis
VF0079	0.00183806	0.0159196	0	0	0	0	0.478126	0.0491977	Capsule	NA	Mediate resistance to both phagocytosis and complement-mediated killing; Opa- and Opc-meidated invasion into host cells is also blocked by the expression of a capsule	NA	Antiphagocytosis
VF0026	0.00160687	0.0207021	0	0	0	0	0.8117	0.0253657	Ptx	Pertussis toxin	Attachment of B. pertussis to ciliated respiratory cells; Important immunogen; Activates cyclic adenosine phosphate (cAMP), histamine sensitising factor (HSF), lymphocytosis promoting factor (LPF), islet-activating protein (IAP), interferes with leucocyte function, haemolytic	Although specific receptors for Ptx have not been identified, many cell surface sialoglycoproteins may serve as PTX receptors. The toxin can also bind to glycoproteins, such as haptoglobin and fetuin, which have served as model proteins for PTX receptors.;The A protomer, consisting of the enzymatically active S1 subunit; the B oligomer, formed by the remaining S2-S5 subunits. The B oligomer binds…	Toxin; Intracellular toxin; ADP-ribosyltransferase; A-B type; Adherence; Type IV secretory protein
VF0191	0.00152931	0.0184206	0	0	0	0	0.505583	0.0186409	TTSS	Type III secretion system	Injects Tir and other effector molecules directly into the host cell. Effector molecules activate cell-signaling pathways, causing alterations in the host cell cytoskeleton and resulting in the depolymerization of actin and the loss of microvilli	NA	Secretion system; Type III secretion system
VF0043	0.0013056	0.0168685	0	0	0	0	1	0.0263096	Capsule	NA	Protecting the organism from phagocytosis and the bactericidial activity of complement	NA	Antiphagocytosis
VF0258	0.00126716	0.0075913	0	0	0	0	0.192246	0.0639453	ShET2	Shigella enterotoxin 2	May account for the early diarrheal phase often observed during shigellosis	NA	Toxin; Enterotoxin
VF0219	0.00102244	0.0101914	0	0	0	0	0.344352	0.023596	ShET1	NA	Ion secretion, mode of action unknown	NA	Toxin; A-B type; Enterotoxin
VF0028	0.000980539	0.00519017	0	0	0	0	0.176395	0.125295	Cya	Invasive Adenylate cyclase /haemolysin	Bifunctional toxin harboring both adenylate cyclase and hemolytic activities;function primarily as an anti-inflammatory factor	Binds to <alpha>M<beta>2 integrin (CD11b/CD18, Mac-1, or CR3), activated by calmodulin and catalyzes the production of intracellular cAMP from ATP. This uncontrolled cAMP concentration leads to paralysis of the killing functions in phagocytic and immune effector cells	Toxin; Adenylate cyclase; RTX toxin
VF0433	0.000953302	0.0183363	0	0	0	0	0.648973	0.00672487	Quorum-sensing	NA	NA	B. pseudomallei encodes three luxI homologs that produce as many as seven quorum-sensing molecules, including C8-HSL (N-octanoyl-L-Homoserine lactone), 3-hydroxy-C8-HSL, 3-oxo-C8-HSL, C1NA-HSL, 3-hydroxy-C1NA-HSL, 3-oxo-C1NA-HSL, 3-hydroxy-C12-HSL, and 3-oxo-C14-HSL. It also has five luxR homologs to sense these signals.;The LuxIR system consists of the AHL (N-acyl-homoserine lactone) synthase Lu…	Signaling; Intercellular signaling
VF0237	0.000895581	0.0113193	0	0	0	0	0.848101	0.0493157	Ibes	Invasion of brain endothelial cells	Contributes to brain mecrovascular endothelial cells (BMECs) invasion via a ligand-receptor interaction	Unknown; the roles of Ibe proteins in E. coli K1 invasion of BMECs were verified by deletion and complementation experiments	Invasion
VF0330	0.000878689	0.0168487	0	0	0	0	0.860901	0.00814063	Cytadherence organelle	NA	The cytadherence organelle is a polar structure that orients mycoplasma binding to host cells and functions in cell division and gliding motility	More than one type of receptor for M. pneumoniae and for other adhering mycoplasmas. Host cell surface sialoglycoconjugates, a sialic acid-free glycoprotein isloated from cultured human lung fibroblasts, sulfated glycolipids containing terminal Gal(3SO4)<beta>1 residues were all found to function as receptors	Adherence
VF0116	0.00085127	0.0108195	0	0	0	0	0.405261	0.0447145	TTSS(SPI-1 encode)	Type III secretion system	Delivers at least 13 effector proteins through the host cell plasma membrane, most of them are involved in actin cytoskeleton rearrangements, leading to membrane ruffling and Salmonlla invasion	NA	Secretion system; Type III secretion system; Invasion
VF0214	0.000761421	0.0130012	0	0	0	0	0.697903	0.0136857	AAFs	Aggregative adherence fimbriae	Adhensin	NA	Adherence
[truncated: 132 more rows]

## Sheet: S1E
Supplementary Table: Species co-abundance network and keystone taxa
species	species_shortname	network_node_degree	keynote species	network_betweenness	network_closeness	species_prevalence	core_microbe
k__Bacteria.p__Actinobacteria.c__Actinobacteria.o__Coriobacteriales.f__Coriobacteriaceae.g__Eggerthella.s__Eggerthella_unclassified	Eggerthella_unclassified	122	Y	46.1601	0.00641026	24.4484
[truncated: 139 more rows]

## Sheet: S1F
Supplementary Table: pathways co-abundance network and keystone pathways
[truncated: 278 more rows]

[truncated: 23 more sheets: S2A, S2B, S2C, S2D, S3A, S3B, S3C, S3D, S3E, S3F, S3G, S3H, S4A, S4B, S4C, S5, S6A, S6B, S6C, S7 …]
